# Supplementary material for: Temporal network analysis identifies early physiological and transcriptomic indicators of mild drought in Brassica rapa
Source: eLife journal article supplement (doi:10.7554/elife.29655), 2017-08-18
Supplement: supp [file elife-29655-supp-v1.zip]

Archive with 10 entries (10 files):
- elife_poa_e29655_Figure_10_figure_supplement_2.tif
- elife_poa_e29655_Figure_10_source_data_1.xlsx
- elife_poa_e29655_Transparent_Reporting_File.docx
- elife_poa_e29655_Figure_1_source_data_1.xlsx
- elife_poa_e29655_Supplementary_File_3.pdf
- elife_poa_e29655_Supplementary_File_2.xlsx
- elife_poa_e29655_Figure_10_figure_supplement_1.tif
- elife_poa_e29655_Figure_3_source_data_1.xlsx
- elife_poa_e29655_Figure_3_figure_supplement_1.tif
- elife_poa_e29655_Supplementary_File_1.xlsx
