# Supplementary material for: Temporal network analysis identifies early physiological and transcriptomic indicators of mild drought in Brassica rapa
Source: eLife journal article supplement (doi:10.7554/elife.29655), 2017-08-18
Supplement: supp [file elife-29655-supp-v1.zip › elife_poa_e29655_Figure_1_source_data_1.xlsx]

## Sheet: Sheet1
Figure 1 - source data 1. Growth conditions and reproducibility of the mild drought treatment.
Table I. Environmental conditions utilized during the staggered experiments for RNAseq and Physiology time courses.
	RNA-seq	Physiology
Day/Night Photoperiod (h)	14 / 10	14 / 10
Growth PPFD (µmol photons m-2 s-1)	200 ± 20	200 ± 20
Measure PPFD (µmol photons m-2 s-1)	300 ± 5	300 ± 5
Day Temperature (°C)	20 ± 2	20 ± 2
Night Temperature (°C)	19 ± 2	19 ± 2
Day Air Relative Humidity (%)	25 ± 10	25 ± 10
Night Air Relative Humidity (%)	45 ± 10	45 ± 10
Table 2. Mean values for dry biomass at ZTl 7 of Day 3 and Day 4 into drought ( n= 6). Mean values for the highest Fv' /Fm' recorded during Day 3 and Day 4 (n=6). All error represent standard errors.
	RNA-seq	Physiology
Dry biomass Well watered (Day 3)	0.0723 ± 0.005	0.0715 ± 0.006
Dry biomass Droughted (Day 3)	0.0582 ± 0.007	0.0587 ± 0.005
Dry biomass Well watered (Day 4)	0.0665 ± 0.006	0.0661 ± 0.001
Dry biomass Droughted (Day 4)	0.0502 ± 0.002	0.0514 ± 0.006
Fv'/ Fm' Well watered (Day 3)	0.742 ± 0.001	0.742 ± 0.001
Fv'/Fm' Droughted (Day 3)	0.748 ± 0.001	0.748 ± 0.001
Fv'/ Fm' Well watered (Day 4)	0.741 ± 0.001	0.743 ± 0.001
Fv'/Fm' Droughted (Day 4)	0.748 ± 0.00I	0.749 ± 0.001
