# Supplementary material for: Temporal network analysis identifies early physiological and transcriptomic indicators of mild drought in Brassica rapa
Source: eLife journal article supplement (doi:10.7554/elife.29655), 2017-08-18
Supplement: supp [file elife-29655-supp-v1.zip › elife_poa_e29655_Figure_3_source_data_1.xlsx]

## Sheet: Mean_Values
Figure 3 - source data 1. Physiology measurements of well-watered (WW) and droughted (D) plants during Day 3 and Day 4 of the drought time course.
Sheet1 -Mean_Values: Mean values used for network analysis to correlate modules with physiology dynamics. The NSC values for ZT9 are the median of ZT5 and ZT13 because biomass was measured from the tissue at that time point. Due to issues with the LiCOR instrument, we did not have gas exchange (gs or A) values for ZT21 on day 3 in WW plants so the value used in the network analysis is a replicate…
Sheet2 -A_Gs_FvFm: Raw data for A, gs and Fv'/Fm'
Sheet3 -NSC: Raw values for NSC
Sheet4 -Biomass: Raw values for above-ground biomass at ZT21 on Day 3 and Day 4
Sheet5 -Volumetric Soil Moisture (%): Raw values for soil moisture measurements and soil water potential values.
A: photosynthetic rate; gs: stomatal conductance; Fv'/Fm': maximum efficiency of PSII in the light; NSCs: non-structural carbohydrates.
Time (ZT)	Day	Sample	A	gs	Fv'/Fm'	NSCs
1	3	WW	11.5316	0.383357	0.741357	2.63193
5	3	WW	11.9874	0.43471	0.742893	2.74741
9	3	WW	11.0354	0.360793	0.709331	3.04474
13	3	WW	7.74892	0.269336	0.707278	3.34208
17	3	WW	-2.7794	0.174495	0	2.04594
21	3	WW	-2.62159	0.132751	0	1.02496
1	3	WW	9.69868	0.343748	0.743296	2.71122
5	3	WW	13.1481	0.539194	0.702289	2.41133
9	3	WW	9.11718	0.349553	0.697545	2.30038
13	3	WW	9.63232	0.382894	0.699901	2.18943
17	3	WW	-2.66443	0.105015	0	2.15426
21	3	WW	-2.62159	0.132751	0	0.957235
1	4	D	12.0478	0.403176	0.749932	2.93101
5	4	D	12.5103	0.52803	0.740716	3.20029
9	4	D	11.8354	0.336462	0.729356	3.14712
13	4	D	5.6584	0.276547	0.684443	3.09394
17	4	D	-2.45765	0.127068	0	2.29552
21	4	D	-2.88133	0.0887692	0	2.56655
1	4	D	8.13546	0.340811	0.685894	3.68274
5	4	D	14.8803	0.489717	0.733782	2.63814
9	4	D	9.36804	0.343367	0.670396	3.17323
13	4	D	9.54982	0.272306	0.678137	3.70831
17	4	D	-2.37934	0.0587458	0	2.99027
21	4	D	-2.88133	0.0887692	0	2.04776

## Sheet: A_Gs_FvFm
Note: Due to instrument malfunction, we were not able to capture A measurements at ZT21 for WW samples on Day 3. Since the ZT17 and ZT21 night time data points for WW and D on Day 3 and Day 4 were indistinguishable, we plotted the WW ZT21 Day 4 measurements for Day 3.
Time (ZT)	Day	Treatment	# Rep	A	gs	Fv'Fm'
1	3	Dry	1	13.0041	0.495921	0.762194
1	3	Dry	2	12.8813	0.387049	0.756169
1	3	Dry	3	12.825	0.396999	0.757614
1	3	Dry	4	12.2488	0.352552	0.755279
1	3	Dry	5	11.3928	0.450994	0.723377
1	3	Dry	6	12.861	0.414959	0.742832
1	3	Dry	7	11.1589	0.439565	0.755171
1	3	Dry	8	10.0108	0.287367	0.746819
5	3	Dry	1	13.4547	0.487293	0.747052
5	3	Dry	2	11.0964	0.540276	0.740815
5	3	Dry	3	12.0515	0.530489	0.726243
5	3	Dry	4	13.5866	0.539772	0.751101
5	3	Dry	5	13.0338	0.586172	0.746022
5	3	Dry	6	12.7069	0.442568	0.738012
5	3	Dry	7	11.8994	0.560383	0.734198
5	3	Dry	8	12.2529	0.53729	0.74229
9	3	Dry	1	12.2579	0.383352	0.735715
9	3	Dry	2	13.2119	0.44763	0.746165
9	3	Dry	3	12.4801	0.311566	0.739667
9	3	Dry	4	11.8149	0.296995	0.721274
9	3	Dry	5	11.2412	0.286824	0.715816
9	3	Dry	6	12.1169	0.411491	0.731573
9	3	Dry	7	10.6609	0.267506	0.716966
9	3	Dry	8	10.8998	0.286334	0.727672
13	3	Dry	1	5.14168	0.26722	0.692235
13	3	Dry	2	7.34413	0.202914	0.665362
13	3	Dry	3	5.08976	0.26017	0.660819
13	3	Dry	4	3.83908	0.345206	0.662423
13	3	Dry	5	5.04642	0.294784	0.692535
13	3	Dry	6	7.4893	0.288985	0.733282
17	3	Dry	1	-2.0648	0.163942	0
17	3	Dry	2	-1.68136	0.131273	0
17	3	Dry	3	-2.52415	0.205895	0
17	3	Dry	4	-3.85141	0.163168	0
17	3	Dry	5	-3.53675	0.173484	0
17	3	Dry	6	-2.35934	0.176038	0
17	3	Dry	7	-1.86926	0.0930739	0
17	3	Dry	8	-2.30353	0.0975096	0
17	3	Dry	9	-1.61958	0.0589733	0
17	3	Dry	10	-1.8183	0.0301532	0
17	3	Dry	11	-3.95453	0.105078	0
17	3	Dry	12	-1.90876	0.126226	0
21	3	Dry	1	-2.38619	0.0685896	0
21	3	Dry	2	-3.21363	0.122986	0
21	3	Dry	3	-2.86356	0.111167	0
21	3	Dry	4	-2.64072	0.0746678	0
21	3	Dry	5	-2.71696	0.0788915	0
21	3	Dry	6	-3.34133	0.160071	0
21	3	Dry	7	-3.01461	0.0955226	0
21	3	Dry	8	-2.96393	0.0819102	0
21	3	Dry	9	-2.12601	0.0720584	0
21	3	Dry	10	-2.13518	0.0501229	0
21	3	Dry	11	-3.23219	0.0733165	0
21	3	Dry	12	-3.9416	0.0759254	0
1	4	Dry	1	8.13349	0.345227	0.747396
1	4	Dry	2	11.5197	0.422173	0.764434
1	4	Dry	3	12.2068	0.443789	0.757952
1	4	Dry	4	11.3422	0.415538	0.753151
1	4	Dry	5	9.10278	0.39912	0.741048
1	4	Dry	6	9.0058	0.38656	0.751993
1	4	Dry	7	8.9433	0.420642	0.748127
1	4	Dry	8	8.00641	0.373133	0.742628
1	4	Dry	9	5.02853	0.251975	0.744336
1	4	Dry	10	9.2125	0.325439	0.74538
1	4	Dry	11	4.75012	0.279318	0.730198
1	4	Dry	12	10.604	0.374067	0.750316
5	4	Dry	1	14.6722	0.670523	0.733211
5	4	Dry	2	15.901	0.555912	0.699582
5	4	Dry	3	16.9241	0.510437	0.726196
5	4	Dry	4	18.5644	0.609339	0.748951
5	4	Dry	5	19.2492	0.618363	0.754489
5	4	Dry	6	18.9326	0.519231	0.756875
5	4	Dry	7	14.0654	0.345161	0.74155
5	4	Dry	8	16.0701	0.35321	0.731088
5	4	Dry	9	17.4632	0.643269	0.704915
5	4	Dry	10	10.6617	0.173616	0.742844
5	4	Dry	11	7.79039	0.51939	0.737956
5	4	Dry	12	8.26938	0.358154	0.727726
9	4	Dry	1	6.09955	0.288588	0.666855
9	4	Dry	2	11.674	0.504109	0.629142
9	4	Dry	3	12.4843	0.452831	0.625426
9	4	Dry	4	11.0995	0.504885	0.697949
9	4	Dry	5	11.9428	0.350052	0.709726
9	4	Dry	6	10.5233	0.172296	0.700533
9	4	Dry	7	1.05744	0.0326737	0.596734
9	4	Dry	8	7.35197	0.382223	0.593235
9	4	Dry	9	10.3508	0.372817	0.709712
9	4	Dry	10	11.0104	0.396576	0.726343
9	4	Dry	11	8.41776	0.325466	0.674344
9	4	Dry	12	10.4047	0.337886	0.71475
13	4	Dry	1	11.6152	0.227128	0.742131
13	4	Dry	2	10.4618	0.354913	0.70321
13	4	Dry	3	11.2233	0.297575	0.730892
13	4	Dry	4	9.64992	0.409365	0.691984
13	4	Dry	5	12.0887	0.318759	0.725097
13	4	Dry	6	11.2934	0.379523	0.689362
13	4	Dry	7	10.2631	0.147938	0.653712
13	4	Dry	8	6.55242	0.16676	0.606616
13	4	Dry	9	8.67912	0.326256	0.642541
13	4	Dry	10	9.24507	0.264153	0.692956
13	4	Dry	11	8.80458	0.292641	0.681117
13	4	Dry	12	4.72135	0.0826592	0.578029
17	4	Dry	1	-1.4604	0.0332383	0
17	4	Dry	2	-0.399804	0.00961301	0
17	4	Dry	3	-2.9575	0.0741547	0
17	4	Dry	4	-3.31033	0.0679281	0
17	4	Dry	5	-3.42216	0.099495	0
17	4	Dry	6	-1.70514	0.0556513	0
17	4	Dry	7	-2.03422	0.0746745	0
17	4	Dry	8	-1.88047	0.0406844	0
17	4	Dry	9	-3.50769	0.0836067	0
17	4	Dry	10	-2.56593	0.0544584	0
17	4	Dry	11	-2.07671	0.0577244	0
17	4	Dry	12	-3.23168	0.0537213	0
21	4	Dry	1	-2.38619	0.0685896	0
21	4	Dry	2	-3.21363	0.122986	0
21	4	Dry	3	-2.86356	0.111167	0
21	4	Dry	4	-2.64072	0.0746678	0
21	4	Dry	5	-2.71696	0.0788915	0
21	4	Dry	6	-3.34133	0.160071	0
21	4	Dry	7	-3.01461	0.0955226	0
21	4	Dry	8	-2.96393	0.0819102	0
21	4	Dry	9	-2.12601	0.0720584	0
21	4	Dry	10	-2.13518	0.0501229	0
21	4	Dry	11	-3.23219	0.0733165	0
21	4	Dry	12	-3.9416	0.0759254	0
1	3	WW	1	11.5851	0.296913	0.751825
1	3	WW	2	10.9392	0.370799	0.744585
1	3	WW	3	11.2622	0.361059	0.730845
1	3	WW	4	11.6597	0.382391	0.73599
1	3	WW	5	11.149	0.386064	0.728011
1	3	WW	6	10.9798	0.405424	0.738894
1	3	WW	7	12.3552	0.444778	0.752709
1	3	WW	8	12.3229	0.419429	0.747999
5	3	WW	1	12.32	0.377315	0.75071
5	3	WW	2	11.8188	0.414575	0.755221
5	3	WW	3	11.8893	0.437099	0.75243
5	3	WW	4	9.99856	0.343276	0.752433
5	3	WW	5	13.0064	0.474274	0.749366
5	3	WW	6	11.3715	0.389874	0.693769
5	3	WW	7	12.7915	0.492779	0.744893
5	3	WW	8	12.7035	0.54849	0.744317
9	3	WW	1	11.9238	0.384189	0.737937
9	3	WW	2	11.2544	0.412817	0.686506
9	3	WW	3	11.8214	0.462989	0.718684
9	3	WW	4	11.081	0.47114	0.690561
9	3	WW	5	11.6331	0.343946	0.70252
9	3	WW	6	9.19586	0.154477	0.683534
9	3	WW	7	11.1958	0.365033	0.715548
9	3	WW	8	10.1782	0.291756	0.739361
13	3	WW	1	7.90761	0.304218	0.725896
13	3	WW	2	10.3764	0.346331	0.71519
13	3	WW	3	8.75197	0.261475	0.733038
13	3	WW	4	8.59383	0.324737	0.658993
13	3	WW	5	8.11954	0.243323	0.699457
13	3	WW	6	7.15836	0.23945	0.686429
13	3	WW	7	8.94406	0.314082	0.725725
13	3	WW	8	1.17913	0.171986	0.688847
13	3	WW	9	4.05183	0.169528	0.750792
13	3	WW	10	9.79105	0.310547	0.694162
13	3	WW	11	9.65397	0.305888	0.691874
13	3	WW	12	8.45923	0.24047	0.716933
17	3	WW	1	-3.33752	0.189332	0
17	3	WW	2	-3.62483	0.2425	0
17	3	WW	3	-2.16844	0.151038	0
17	3	WW	4	-4.04968	0.175702	0
17	3	WW	5	-3.68606	0.249003	0
17	3	WW	6	-1.8608	0.0569313	0
17	3	WW	7	-1.42027	0.0977943	0
17	3	WW	8	-1.28971	0.139027	0
17	3	WW	9	-3.04191	0.221657	0
17	3	WW	10	-2.39432	0.150014	0
17	3	WW	11	-3.09521	0.250687	0
17	3	WW	12	-3.38411	0.170254	0
21	3	WW	1		0.150785	0
21	3	WW	2		0.249002	0
21	3	WW	3		0.201038	0
21	3	WW	4		0.0977943	0
21	3	WW	5		0.189332	0
21	3	WW	6		0.150014	0
21	3	WW	7		0.150254	0
21	3	WW	8		0.121456	0
21	3	WW	9		0.2425	0
21	3	WW	10		0.176931	0
21	3	WW	11		0.239027	0
21	3	WW	12		0.125802	0
1	4	WW	1	11.1618	0.301751	0.75681
1	4	WW	2	10.3084	0.377025	0.755101
1	4	WW	3	8.51659	0.293755	0.759202
1	4	WW	4	9.78958	0.439691	0.744958
1	4	WW	5	6.27504	0.105473	0.714241
1	4	WW	6	10.7039	0.377923	0.749516
1	4	WW	7	9.04727	0.316613	0.744032
1	4	WW	8	10.4287	0.444191	0.746925
1	4	WW	9	9.52325	0.311577	0.716649
1	4	WW	10	10.0909	0.379985	0.745985
1	4	WW	11	10.2715	0.337457	0.74545
1	4	WW	12	10.2673	0.439528	0.740686
5	4	WW	1	17.2341	0.583809	0.734051
5	4	WW	2	16.2843	0.547628	0.709534
5	4	WW	3	16.2325	0.52899	0.705824
5	4	WW	4	15.9056	0.459272	0.699695
5	4	WW	5	15.5677	0.536549	0.711003
5	4	WW	6	12.4889	0.417153	0.61503
5	4	WW	7	10.1361	0.593107	0.74679
5	4	WW	8	10.5624	0.571738	0.69394
5	4	WW	9	9.55194	0.626938	0.662819
5	4	WW	10	10.849	0.548514	0.685287
5	4	WW	11	12.515	0.61354	0.75328
5	4	WW	12	10.4493	0.443085	0.710211
9	4	WW	1	8.50574	0.322549	0.662693
9	4	WW	2	7.50348	0.47468	0.693859
9	4	WW	3	11.1222	0.513257	0.714223
9	4	WW	4	10.9256	0.427914	0.708304
9	4	WW	5	11.5032	0.383937	0.70299
9	4	WW	6	6.41617	0.16012	0.733068
9	4	WW	7	12.0852	0.488292	0.737668
9	4	WW	8	8.27033	0.216671	0.657007
9	4	WW	9	6.36449	0.251148	0.675469
9	4	WW	10	9.68322	0.243711	0.697056
9	4	WW	11	7.7634	0.36298	0.703543
9	4	WW	12	9.26314	0.349377	0.684665
13	4	WW	1	9.65277	0.395149	0.685465
13	4	WW	2	10.34	0.407702	0.715552
13	4	WW	3	11.295	0.448416	0.732365
13	4	WW	4	9.95211	0.378607	0.721374
13	4	WW	5	5.61678	0.273667	0.67823
13	4	WW	6	6.07223	0.35078	0.623748
13	4	WW	7	10.3481	0.355462	0.708212
13	4	WW	8	11.5053	0.573402	0.725474
13	4	WW	9	10.0794	0.486371	0.689325
13	4	WW	10	9.99598	0.385177	0.728274
13	4	WW	11	10.2877	0.302288	0.71589
13	4	WW	12	10.4424	0.237705	0.674909
17	4	WW	1	-2.84641	0.0896779	0
17	4	WW	2	-2.48488	0.0895671	0
17	4	WW	3	-1.75241	0.0677144	0
17	4	WW	4	-2.43794	0.0833316	0
17	4	WW	5	-1.54063	0.0878076	0
17	4	WW	6	-2.56141	0.0555548	0
17	4	WW	7	-2.62491	0.127071	0
17	4	WW	8	-3.06587	0.152142	0
17	4	WW	9	-3.7877	0.133882	0
17	4	WW	10	-2.74534	0.188068	0
17	4	WW	11	-2.66391	0.100418	0
17	4	WW	12	-3.46177	0.0849498	0
21	4	WW	1	-2.08283	0.163307	0
21	4	WW	2	-2.39513	0.118267	0
21	4	WW	3	-2.68601	0.139027	0
21	4	WW	4	-2.86202	0.107049	0
21	4	WW	5	-2.77278	0.116284	0
21	4	WW	6	-3.37734	0.101283	0
21	4	WW	7	-1.36265	0.150014	0
21	4	WW	8	-3.44363	0.0998832	0
21	4	WW	9	-2.11667	0.170546	0
21	4	WW	10	-3.76896	0.102941	0
21	4	WW	11	-1.86917	0.152142	0
21	4	WW	12	-2.7219	0.172263	0

## Sheet: NSC
Time (ZT)	Day	Treatment	NSC (mg/g)
1	3	WW	2.67364
1	3	WW	2.61719
1	3	WW	2.33697
1	3	WW	2.37404
1	3	WW	2.4977
1	3	WW	2.50926
1	3	WW	2.52572
1	3	WW	2.45512
1	3	WW	2.87693
1	3	WW	2.80763
1	3	WW	2.9872
1	3	WW	2.92181
5	3	WW	2.97924
5	3	WW	1.79969
5	3	WW	3.04977
5	3	WW	3.16156
5	3	WW	2.89703
5	3	WW	2.28756
5	3	WW	2.81343
5	3	WW	3.18008
5	3	WW	3.02545
5	3	WW	3.01853
5	3	WW	2.86313
5	3	WW	1.89339
13	3	WW	3.23864
13	3	WW	4.04536
13	3	WW	3.33605
13	3	WW	3.30786
13	3	WW	5.33112
13	3	WW	3.07284
13	3	WW	4.02102
13	3	WW	3.73198
13	3	WW	2.4886
13	3	WW	3.0794
13	3	WW	2.55551
13	3	WW	2.81194
13	3	WW	2.42671
17	3	WW	2.25546
17	3	WW	1.87365
17	3	WW	1.05907
17	3	WW	2.97999
17	3	WW	2.39431
17	3	WW	1.58997
17	3	WW	1.4213
17	3	WW	2.51702
17	3	WW	2.14815
17	3	WW	2.44709
17	3	WW	2.00617
17	3	WW	1.85907
21	3	WW	1.27478
21	3	WW	0.695336
21	3	WW	1.04904
21	3	WW	1.38958
21	3	WW	0.63926
21	3	WW	0.91113
21	3	WW	0.258684
21	3	WW	0.904525
21	3	WW	1.13944
21	3	WW	1.73483
21	3	WW	1.04593
21	3	WW	1.22734
1	4	WW	3.18615
1	4	WW	2.33949
1	4	WW	2.0104
1	4	WW	4.40849
1	4	WW	2.51507
1	4	WW	2.4374
1	4	WW	2.5899
1	4	WW	2.73798
1	4	WW	2.34879
1	4	WW	2.17819
1	4	WW	2.59237
1	4	WW	3.19044
5	4	WW	2.42205
5	4	WW	2.59783
5	4	WW	2.30559
5	4	WW	2.09834
5	4	WW	2.15858
5	4	WW	2.2025
5	4	WW	2.50644
5	4	WW	2.35121
5	4	WW	2.46022
5	4	WW	2.88638
5	4	WW	2.23449
5	4	WW	2.71238
13	4	WW	2.25923
13	4	WW	2.27797
13	4	WW	1.97816
13	4	WW	1.90155
13	4	WW	2.14866
13	4	WW	2.16171
13	4	WW	2.32177
13	4	WW	2.29631
13	4	WW	2.43932
13	4	WW	2.1938
13	4	WW	2.10148
13	4	WW	2.19324
17	4	WW	1.84486
17	4	WW	1.75225
17	4	WW	2.10183
17	4	WW	2.72186
17	4	WW	1.8849
17	4	WW	2.14743
17	4	WW	2.13452
17	4	WW	2.08056
17	4	WW	2.25281
17	4	WW	2.23877
17	4	WW	2.08767
17	4	WW	2.60367
21	4	WW	0.96206
21	4	WW	0.805999
21	4	WW	1.19269
21	4	WW	1.25928
21	4	WW	1.00515
21	4	WW	0.867941
21	4	WW	1.03121
21	4	WW	0.513479
1	3	Dry	3.02516
1	3	Dry	2.8626
1	3	Dry	3.11216
1	3	Dry	3.05344
1	3	Dry	2.60006
1	3	Dry	3.17218
1	3	Dry	3.41571
1	3	Dry	3.3874
1	3	Dry	2.70304
1	3	Dry	2.45971
1	3	Dry	2.43625
1	3	Dry	2.94438
5	3	Dry	3.16332
5	3	Dry	3.25356
5	3	Dry	2.99359
5	3	Dry	3.27802
5	3	Dry	3.19585
5	3	Dry	3.82926
5	3	Dry	3.19483
5	3	Dry	3.18665
5	3	Dry	2.74574
5	3	Dry	3.26326
5	3	Dry	3.15483
5	3	Dry	3.14452
13	3	Dry	3.33195
13	3	Dry	3.09771
13	3	Dry	3.24223
13	3	Dry	2.43553
13	3	Dry	2.95635
13	3	Dry	3.05345
13	3	Dry	3.48311
13	3	Dry	2.98212
13	3	Dry	3.31192
13	3	Dry	3.16126
13	3	Dry	3.13405
13	3	Dry	2.93765
17	3	Dry	0.96681
17	3	Dry	2.29652
17	3	Dry	2.73956
17	3	Dry	2.41043
17	3	Dry	2.59476
17	3	Dry	2.62767
17	3	Dry	2.71803
17	3	Dry	2.70087
17	3	Dry	2.5552
17	3	Dry	2.48996
17	3	Dry	2.42961
17	3	Dry	1.01682
21	3	Dry	2.98418
21	3	Dry	2.73879
21	3	Dry	2.70363
21	3	Dry	2.72033
21	3	Dry	2.01158
21	3	Dry	2.65323
21	3	Dry	2.41483
21	3	Dry	2.66101
21	3	Dry	2.55102
21	3	Dry	2.31483
21	3	Dry	2.68854
21	3	Dry	2.35664
1	4	Dry	3.3764
1	4	Dry	3.69859
1	4	Dry	3.12393
1	4	Dry	3.75776
1	4	Dry	4.49816
1	4	Dry	3.36078
1	4	Dry	3.36677
1	4	Dry	4.32377
1	4	Dry	3.27147
1	4	Dry	4.79643
1	4	Dry	2.99419
1	4	Dry	3.62458
5	4	Dry	2.40852
5	4	Dry	2.21647
5	4	Dry	0.865504
5	4	Dry	2.59316
5	4	Dry	3.5073
5	4	Dry	3.06389
5	4	Dry	2.80658
5	4	Dry	2.55374
5	4	Dry	3.08642
5	4	Dry	2.74884
5	4	Dry	2.67158
5	4	Dry	3.1357
13	4	Dry	4.21475
13	4	Dry	3.92344
13	4	Dry	3.78569
13	4	Dry	4.07933
13	4	Dry	3.25651
13	4	Dry	3.92385
13	4	Dry	3.51209
13	4	Dry	3.95275
13	4	Dry	3.71205
13	4	Dry	3.70043
13	4	Dry	3.41691
13	4	Dry	3.02195
17	4	Dry	2.79673
17	4	Dry	3.14018
17	4	Dry	3.44592
17	4	Dry	2.91124
17	4	Dry	2.99472
17	4	Dry	2.34956
17	4	Dry	2.53544
17	4	Dry	2.62855
17	4	Dry	3.20023
17	4	Dry	3.44674
17	4	Dry	2.77993
17	4	Dry	3.65402
21	4	Dry	2.02037
21	4	Dry	2.42867
21	4	Dry	2.00989
21	4	Dry	1.9898
21	4	Dry	1.90361
21	4	Dry	2.18549
21	4	Dry	1.95506
21	4	Dry	2.20907
21	4	Dry	2.08809
21	4	Dry	2.14626
21	4	Dry	1.67743
21	4	Dry	1.95938

## Sheet: Biomass
Treatment	Time (ZT)	Day	Dry Weight Shoots
WW	9	3	0.042
WW	9	3	0.047
WW	9	3	0.066
WW	9	3	0.043
WW	9	3	0.064
WW	9	3	0.066
WW	9	3	0.06
WW	9	3	0.061
WW	9	3	0.064
WW	9	3	0.063
WW	9	3	0.043
WW	9	3	0.065
D	9	3	0.093
D	9	3	0.054
D	9	3	0.039
D	9	3	0.041
D	9	3	0.045
D	9	3	0.034
D	9	3	0.099
D	9	3	0.04
D	9	3	0.048
D	9	3	0.038
D	9	3	0.034
D	9	3	0.052
WW	9	4	0.074
WW	9	4	0.041
WW	9	4	0.08
WW	9	4	0.053
WW	9	4	0.053
WW	9	4	0.102
WW	9	4	0.106
WW	9	4	0.097
WW	9	4	0.091
WW	9	4	0.058
WW	9	4	0.062
WW	9	4	0.042
D	9	4	0.075
D	9	4	0.037
D	9	4	0.078
D	9	4	0.069
D	9	4	0.049
D	9	4	0.06
D	9	4	0.041
D	9	4	0.099
D	9	4	0.054
D	9	4	0.067
D	9	4	0.037
D	9	4	0.039

## Sheet: Volumetric Soil Moisture (%)
RNA-seq Time Course				Physiology Time Course						SWP
Time	Day	Treatment	SM (%)	Time	Day	Treatment	SM (%)		TimePoint	Phys_WW	Phys_D	RNA-seq_WW	RNA-seq_D
ZT2	3	WW	33.3	ZT2	3	WW	31.3		ZT2 Day3	-0.4	-0.88	-0.2	-0.4
ZT2	3	WW	35	ZT2	3	WW	37.6		ZT5 Day3	-0.2	-0.6	-0.4	-0.6
ZT2	3	WW	31.5	ZT2	3	WW	35.9		ZT9 Day3	-0.25	-0.9	-0.25	-0.7
ZT2	3	WW	37.5	ZT2	3	WW	24.2		ZT13 Day3	-0.4	-0.89	-0.39	-0.8
ZT2	3	WW	32.2	ZT2	3	WW	31.1		ZT1 Day4	-0.05	-0.9	-0.26	-0.8
ZT2	3	WW	31	ZT2	3	WW	28.9		ZT5 Day4	-0.4	-0.8	-0.4	-0.85
ZT2	3	WW	36	ZT2	3	WW	33.2		ZT9 Day4	-0.3	-1	-0.42	-0.9
ZT2	3	WW	33.8	ZT2	3	WW	29.6		ZT13 Day4	-0.2	-1.3	-0.01	-1.4
ZT2	3	WW	35.2	ZT2	3	WW	26.6		ZT17 Day4	-0.4	-1.5	-0.43	-1.35
ZT2	3	WW	34.4	ZT2	3	WW	28.4		ZT1 Day5	-0.5	-1.5	-0.42	-1.35
ZT2	3	WW	30.3	ZT2	3	WW	25.9
ZT2	3	WW	32.8	ZT2	3	WW	28.9		Bulk Density:2.17g/cm3
ZT2	3	WW	37	ZT2	3	Dry	21.6
ZT2	3	WW	32.8	ZT2	3	Dry	20.9
ZT2	3	WW	32.9	ZT2	3	Dry	21.6
ZT2	3	WW	34.1	ZT2	3	Dry	20.7
ZT2	3	WW	32.2	ZT2	3	Dry	22.5
ZT2	3	WW	36.1	ZT2	3	Dry	21.6
ZT2	3	WW	33.8	ZT2	3	Dry	21.9
ZT2	3	WW	33.7	ZT2	3	Dry	24
ZT2	3	Dry	23.8	ZT2	3	Dry	20.9
ZT2	3	Dry	26	ZT2	3	Dry	20.7
ZT2	3	Dry	25.2	ZT2	3	Dry	23.5
ZT2	3	Dry	27.3	ZT2	3	Dry	22.8
ZT2	3	Dry	26.9	ZT5	3	WW	38.5
ZT2	3	Dry	26.8	ZT5	3	WW	35.7
ZT2	3	Dry	25.2	ZT5	3	WW	32
ZT2	3	Dry	25.4	ZT5	3	WW	32.8
ZT2	3	Dry	24.7	ZT5	3	WW	29.8
ZT2	3	Dry	28.6	ZT5	3	WW	33
ZT2	3	Dry	26.6	ZT5	3	WW	36.1
ZT2	3	Dry	24.9	ZT5	3	WW	37.3
ZT2	3	Dry	25.1	ZT5	3	WW	36.8
ZT2	3	Dry	17.1	ZT5	3	WW	39.5
ZT2	3	Dry	23.7	ZT5	3	WW	35.6
ZT2	3	Dry	26.4	ZT5	3	WW	26.1
ZT2	3	Dry	28.1	ZT5	3	Dry	23.6
ZT2	3	Dry	25.4	ZT5	3	Dry	24.9
ZT2	3	Dry	29	ZT5	3	Dry	25.3
ZT2	3	Dry	29.7	ZT5	3	Dry	24.3
ZT5	3	WW	30	ZT5	3	Dry	25.4
ZT5	3	WW	30	ZT5	3	Dry	23.5
ZT5	3	WW	29.8	ZT5	3	Dry	20.8
ZT5	3	WW	30.4	ZT5	3	Dry	22
ZT5	3	WW	33.7	ZT5	3	Dry	18.3
ZT5	3	WW	29.9	ZT5	3	Dry	24.2
ZT5	3	WW	28.6	ZT5	3	Dry	24.3
ZT5	3	WW	28.7	ZT5	3	Dry	23.8
ZT5	3	WW	28.1	ZT9	3	WW	30.8
ZT5	3	WW	29.5	ZT9	3	WW	28.7
ZT5	3	WW	28.8	ZT9	3	WW	33.5
ZT5	3	WW	30.2	ZT9	3	WW	31.9
ZT5	3	WW	32.2	ZT9	3	WW	30.2
ZT5	3	WW	32.2	ZT9	3	WW	30.5
ZT5	3	WW	31.1	ZT9	3	WW	28.8
ZT5	3	WW	29.9	ZT9	3	WW	35.7
ZT5	3	WW	33.6	ZT9	3	WW	38.5
ZT5	3	WW	28.2	ZT9	3	WW	30.4
ZT5	3	WW	28.5	ZT9	3	WW	32.3
ZT5	3	WW	31.8	ZT9	3	WW	38.7
ZT5	3	Dry	23.8	ZT9	3	Dry	23.9
ZT5	3	Dry	21.7	ZT9	3	Dry	26.3
ZT5	3	Dry	24.1	ZT9	3	Dry	20.4
ZT5	3	Dry	24.7	ZT9	3	Dry	20.4
ZT5	3	Dry	23.3	ZT9	3	Dry	21.1
ZT5	3	Dry	22.8	ZT9	3	Dry	20.1
ZT5	3	Dry	22.5	ZT9	3	Dry	25.1
ZT5	3	Dry	24	ZT9	3	Dry	24.1
ZT5	3	Dry	26.3	ZT9	3	Dry	24.8
ZT5	3	Dry	22.6	ZT9	3	Dry	22.8
ZT5	3	Dry	24.1	ZT9	3	Dry	24.7
ZT5	3	Dry	24.9	ZT9	3	Dry	27.1
ZT5	3	Dry	23.1	ZT13	3	WW	33.9
ZT5	3	Dry	20.9	ZT13	3	WW	34.4
ZT5	3	Dry	23.7	ZT13	3	WW	32.2
ZT5	3	Dry	22	ZT13	3	WW	37.6
ZT5	3	Dry	22.1	ZT13	3	WW	28.7
ZT5	3	Dry	25.1	ZT13	3	WW	30.7
ZT5	3	Dry	23.3	ZT13	3	WW	26.2
ZT5	3	Dry	21.1	ZT13	3	WW	31.8
ZT9	3	WW	35.3	ZT13	3	WW	33.1
ZT9	3	WW	30.9	ZT13	3	WW	34
ZT9	3	WW	33.7	ZT13	3	WW	29.8
ZT9	3	WW	32.6	ZT13	3	WW	29.2
ZT9	3	WW	35.9	ZT13	3	Dry	38.7
ZT9	3	WW	29.8	ZT13	3	Dry	24.7
ZT9	3	WW	32.3	ZT13	3	Dry	22.3
ZT9	3	WW	31.6	ZT13	3	Dry	23.4
ZT9	3	WW	33.8	ZT13	3	Dry	22.8
ZT9	3	WW	31	ZT13	3	Dry	24.3
ZT9	3	WW	30.4	ZT13	3	Dry	21.1
ZT9	3	WW	38.5	ZT13	3	Dry	21.2
ZT9	3	WW	31.2	ZT13	3	Dry	22.3
ZT9	3	WW	30.1	ZT13	3	Dry	21.5
ZT9	3	WW	34.3	ZT13	3	Dry	23.5
ZT9	3	WW	33.4	ZT13	3	Dry	21.2
ZT9	3	WW	37.2	ZT1	4	WW	29.1
ZT9	3	WW	26.7	ZT1	4	WW	33.5
ZT9	3	WW	32.9	ZT1	4	WW	38.1
ZT9	3	WW	33.9	ZT1	4	WW	32.3
ZT9	3	Dry	17.4	ZT1	4	WW	35.9
ZT9	3	Dry	25.5	ZT1	4	WW	33.2
ZT9	3	Dry	25.1	ZT1	4	WW	41
ZT9	3	Dry	17.4	ZT1	4	WW	41.1
ZT9	3	Dry	25.2	ZT1	4	WW	34.3
ZT9	3	Dry	24.5	ZT1	4	WW	41.6
ZT9	3	Dry	22	ZT1	4	WW	44.3
ZT9	3	Dry	24.1	ZT1	4	WW	41.1
ZT9	3	Dry	25.6	ZT1	4	Dry	19.1
ZT9	3	Dry	26.3	ZT1	4	Dry	24.5
ZT9	3	Dry	18.7	ZT1	4	Dry	18.4
ZT9	3	Dry	24.1	ZT1	4	Dry	22.8
ZT9	3	Dry	24.1	ZT1	4	Dry	18.1
ZT9	3	Dry	21.2	ZT1	4	Dry	23.1
ZT9	3	Dry	18.9	ZT1	4	Dry	23
ZT9	3	Dry	23.3	ZT1	4	Dry	18.6
ZT9	3	Dry	23	ZT1	4	Dry	23.8
ZT9	3	Dry	22.4	ZT1	4	Dry	24.5
ZT9	3	Dry	22.4	ZT1	4	Dry	27.5
ZT9	3	Dry	24.6	ZT1	4	Dry	24.3
ZT13	3	WW	33.3	ZT5	4	WW	41.1
ZT13	3	WW	29.4	ZT5	4	WW	32
ZT13	3	WW	29.3	ZT5	4	WW	36
ZT13	3	WW	25.6	ZT5	4	WW	29.4
ZT13	3	WW	30.8	ZT5	4	WW	32.2
ZT13	3	WW	29.1	ZT5	4	WW	37.3
ZT13	3	WW	29.9	ZT5	4	WW	30.1
ZT13	3	WW	36.1	ZT5	4	WW	31.6
ZT13	3	WW	33.3	ZT5	4	WW	27.9
ZT13	3	WW	34.7	ZT5	4	WW	33.2
ZT13	3	WW	34.3	ZT5	4	WW	29.6
ZT13	3	WW	31.8	ZT5	4	WW	24.3
ZT13	3	WW	31.3	ZT5	4	Dry	22.7
ZT13	3	WW	29.9	ZT5	4	Dry	21.9
ZT13	3	WW	30.1	ZT5	4	Dry	22.6
ZT13	3	WW	28.5	ZT5	4	Dry	19
ZT13	3	WW	31	ZT5	4	Dry	11
ZT13	3	WW	29.6	ZT5	4	Dry	21
ZT13	3	WW	34.5	ZT5	4	Dry	20.8
ZT13	3	WW	28.5	ZT5	4	Dry	18.8
ZT13	3	Dry	23.2	ZT5	4	Dry	20.7
ZT13	3	Dry	24.5	ZT5	4	Dry	24.1
ZT13	3	Dry	23.4	ZT5	4	Dry	26.6
ZT13	3	Dry	23	ZT5	4	Dry	23
ZT13	3	Dry	23.4	ZT9	4	WW	33.5
ZT13	3	Dry	23.6	ZT9	4	WW	33.6
ZT13	3	Dry	25.5	ZT9	4	WW	34.2
ZT13	3	Dry	21.6	ZT9	4	WW	34.5
ZT13	3	Dry	23.6	ZT9	4	WW	35.5
ZT13	3	Dry	23.2	ZT9	4	WW	36.4
ZT13	3	Dry	22.2	ZT9	4	WW	34.5
ZT13	3	Dry	24.3	ZT9	4	WW	34.7
ZT13	3	Dry	18.9	ZT9	4	WW	34.9
ZT13	3	Dry	24.5	ZT9	4	WW	34.7
ZT13	3	Dry	21.4	ZT9	4	WW	39.3
ZT13	3	Dry	21.3	ZT9	4	WW	34.6
ZT13	3	Dry	21.1	ZT9	4	Dry	26.9
ZT13	3	Dry	20.2	ZT9	4	Dry	25.9
ZT13	3	Dry	21.8	ZT9	4	Dry	15.8
ZT13	3	Dry	23.4	ZT9	4	Dry	17
ZT1	4	WW	34.1	ZT9	4	Dry	13.7
ZT1	4	WW	34.2	ZT9	4	Dry	15.6
ZT1	4	WW	26.8	ZT9	4	Dry	0
ZT1	4	WW	32.5	ZT9	4	Dry	19.7
ZT1	4	WW	32.7	ZT9	4	Dry	11.6
ZT1	4	WW	38.1	ZT9	4	Dry	18.8
ZT1	4	WW	30.8	ZT9	4	Dry	18.3
ZT1	4	WW	31.1	ZT9	4	Dry	10.7
ZT1	4	WW	33	ZT13	4	WW	27.5
ZT1	4	WW	30.7	ZT13	4	WW	32.9
ZT1	4	WW	34.4	ZT13	4	WW	37.3
ZT1	4	WW	37.6	ZT13	4	WW	47.2
ZT1	4	WW	31	ZT13	4	WW	46.5
ZT1	4	WW	36.2	ZT13	4	WW	43.2
ZT1	4	WW	34.7	ZT13	4	WW	31.8
ZT1	4	WW	33	ZT13	4	WW	35.6
ZT1	4	WW	31.9	ZT13	4	WW	38.5
ZT1	4	WW	27.9	ZT13	4	WW	32.1
ZT1	4	WW	33.4	ZT13	4	WW	35.1
ZT1	4	WW	32.7	ZT13	4	WW	32.1
ZT1	4	Dry	24.4	ZT13	4	Dry	14.2
ZT1	4	Dry	19.7	ZT13	4	Dry	18.6
ZT1	4	Dry	25	ZT13	4	Dry	14.4
ZT1	4	Dry	21.1	ZT13	4	Dry	14.1
ZT1	4	Dry	17.2	ZT13	4	Dry	17.3
ZT1	4	Dry	21.2	ZT13	4	Dry	18.5
ZT1	4	Dry	24.2	ZT13	4	Dry	18.2
ZT1	4	Dry	15.8	ZT13	4	Dry	12.8
ZT1	4	Dry	22.3	ZT13	4	Dry	12.2
ZT1	4	Dry	23.1	ZT13	4	Dry	12.7
ZT1	4	Dry	23	ZT13	4	Dry	9.7
ZT1	4	Dry	20.2	ZT13	4	Dry	15.9
ZT1	4	Dry	23.1	ZT17	4	WW	32.5
ZT1	4	Dry	23.7	ZT17	4	WW	36.8
ZT1	4	Dry	18.8	ZT17	4	WW	33.3
ZT1	4	Dry	19.6	ZT17	4	WW	35.1
ZT1	4	Dry	19.6	ZT17	4	WW	35.3
ZT1	4	Dry	19.9	ZT17	4	WW	35.5
ZT1	4	Dry	19.9	ZT17	4	WW	36.7
ZT1	4	Dry	21.5	ZT17	4	WW	28.7
ZT5	4	WW	32.9	ZT17	4	WW	31.9
ZT5	4	WW	29.3	ZT17	4	WW	36.3
ZT5	4	WW	31.1	ZT17	4	WW	34
ZT5	4	WW	31.3	ZT17	4	WW	31.4
ZT5	4	WW	22.1	ZT17	4	Dry	3.1
ZT5	4	WW	33.4	ZT17	4	Dry	10.2
ZT5	4	WW	30.2	ZT17	4	Dry	15.2
ZT5	4	WW	29.9	ZT17	4	Dry	15.8
ZT5	4	WW	33	ZT17	4	Dry	11.3
ZT5	4	WW	29.8	ZT17	4	Dry	12.2
ZT5	4	WW	29.8	ZT17	4	Dry	14.7
ZT5	4	WW	34.4	ZT17	4	Dry	17.7
ZT5	4	WW	30.7	ZT17	4	Dry	19
ZT5	4	WW	32.6	ZT17	4	Dry	18
ZT5	4	WW	31.5	ZT17	4	Dry	17.7
ZT5	4	WW	31.1	ZT17	4	Dry	11.8
ZT5	4	WW	30.8	ZT1	5	WW	31.7
ZT5	4	WW	32.4	ZT1	5	WW	37.3
ZT5	4	WW	32.1	ZT1	5	WW	32.5
ZT5	4	WW	32.7	ZT1	5	WW	32.1
ZT5	4	Dry	21.9	ZT1	5	WW	33.3
ZT5	4	Dry	21.1	ZT1	5	WW	29.4
ZT5	4	Dry	20.7	ZT1	5	WW	27.5
ZT5	4	Dry	19.5	ZT1	5	WW	31.2
ZT5	4	Dry	16.4	ZT1	5	WW	30.9
ZT5	4	Dry	16.3	ZT1	5	WW	36
ZT5	4	Dry	21.7	ZT1	5	WW	32
ZT5	4	Dry	20.6	ZT1	5	WW	36.8
ZT5	4	Dry	24.5	ZT1	5	Dry	10.2
ZT5	4	Dry	21.2	ZT1	5	Dry	18
ZT5	4	Dry	12.6	ZT1	5	Dry	12.8
ZT5	4	Dry	19	ZT1	5	Dry	15.3
ZT5	4	Dry	19.4	ZT1	5	Dry	12.6
ZT5	4	Dry	20	ZT1	5	Dry	14.9
ZT5	4	Dry	19.3	ZT1	5	Dry	9.4
ZT5	4	Dry	19.2	ZT1	5	Dry	7.1
ZT5	4	Dry	24.6	ZT1	5	Dry	16
ZT5	4	Dry	17.4	ZT1	5	Dry	11.4
ZT5	4	Dry	19.4	ZT1	5	Dry	15.6
ZT5	4	Dry	19.4	ZT1	5	Dry	16.8
ZT9	4	WW	33.7
ZT9	4	WW	27.5
ZT9	4	WW	27.5
ZT9	4	WW	33.4
ZT9	4	WW	31.8
ZT9	4	WW	34
ZT9	4	WW	29
ZT9	4	WW	34.2
ZT9	4	WW	33.6
ZT9	4	WW	31.2
ZT9	4	WW	30.5
ZT9	4	WW	33.4
ZT9	4	WW	30.7
ZT9	4	WW	29.4
ZT9	4	WW	30.9
ZT9	4	WW	27.4
ZT9	4	WW	32.4
ZT9	4	WW	34.1
ZT9	4	WW	34.7
ZT9	4	WW	34.8
ZT9	4	Dry	25.6
ZT9	4	Dry	25.4
ZT9	4	Dry	21.1
ZT9	4	Dry	17.4
ZT9	4	Dry	22.5
ZT9	4	Dry	14.9
ZT9	4	Dry	18
ZT9	4	Dry	15.1
ZT9	4	Dry	16.9
ZT9	4	Dry	17.7
ZT9	4	Dry	20.5
ZT9	4	Dry	11.2
ZT9	4	Dry	18.8
ZT9	4	Dry	8.6
ZT9	4	Dry	11.6
ZT9	4	Dry	13.7
ZT9	4	Dry	18.8
ZT9	4	Dry	16
ZT9	4	Dry	20.4
ZT9	4	Dry	12.8
ZT13	4	WW	44.9
ZT13	4	WW	38.7
ZT13	4	WW	39.5
ZT13	4	WW	41.3
ZT13	4	WW	37.4
ZT13	4	WW	40.4
ZT13	4	WW	36.8
ZT13	4	WW	40.7
ZT13	4	WW	41.2
ZT13	4	WW	37.2
ZT13	4	WW	34.2
ZT13	4	WW	32.6
ZT13	4	WW	35.4
ZT13	4	WW	35.9
ZT13	4	WW	32.9
ZT13	4	WW	36.9
ZT13	4	WW	39.8
ZT13	4	WW	31.3
ZT13	4	WW	31.9
ZT13	4	WW	37.5
ZT13	4	Dry	16.3
ZT13	4	Dry	18.2
ZT13	4	Dry	17.7
ZT13	4	Dry	17.6
ZT13	4	Dry	20.3
ZT13	4	Dry	20
ZT13	4	Dry	13.3
ZT13	4	Dry	21.4
ZT13	4	Dry	14.9
ZT13	4	Dry	13.2
ZT13	4	Dry	11.2
ZT13	4	Dry	22.8
ZT13	4	Dry	8.1
ZT13	4	Dry	20
ZT13	4	Dry	17.8
ZT13	4	Dry	6
ZT13	4	Dry	14.8
ZT13	4	Dry	16.7
ZT13	4	Dry	12
ZT13	4	Dry	9.9
ZT17	4	WW	32.9
ZT17	4	WW	33
ZT17	4	WW	28.4
ZT17	4	WW	26.7
ZT17	4	WW	34.7
ZT17	4	WW	32.4
ZT17	4	WW	32.9
ZT17	4	WW	30.7
ZT17	4	WW	34.6
ZT17	4	WW	32
ZT17	4	WW	32.4
ZT17	4	WW	31
ZT17	4	WW	31.2
ZT17	4	WW	29.6
ZT17	4	WW	32.4
ZT17	4	WW	29.5
ZT17	4	WW	32.9
ZT17	4	WW	30.9
ZT17	4	WW	34.9
ZT17	4	WW	34.1
ZT17	4	Dry	15.8
ZT17	4	Dry	19.8
ZT17	4	Dry	11.5
ZT17	4	Dry	14.3
ZT17	4	Dry	19.9
ZT17	4	Dry	19.3
ZT17	4	Dry	17.5
ZT17	4	Dry	17.1
ZT17	4	Dry	16.1
ZT17	4	Dry	17.1
ZT17	4	Dry	14.7
ZT17	4	Dry	15.8
ZT17	4	Dry	10.6
ZT17	4	Dry	17.1
ZT17	4	Dry	16.2
ZT17	4	Dry	16.7
ZT17	4	Dry	10.4
ZT17	4	Dry	15.8
ZT17	4	Dry	14.5
ZT17	4	Dry	5.6
ZT1	5	WW	32.9
ZT1	5	WW	33
ZT1	5	WW	28.4
ZT1	5	WW	26.7
ZT1	5	WW	34.7
ZT1	5	WW	32.4
ZT1	5	WW	32.9
ZT1	5	WW	30.7
ZT1	5	WW	34.6
ZT1	5	WW	32
ZT1	5	WW	32.4
ZT1	5	WW	31
ZT1	5	WW	31.2
ZT1	5	WW	29.6
ZT1	5	WW	32.4
ZT1	5	WW	29.5
ZT1	5	WW	32.9
ZT1	5	WW	30.9
ZT1	5	WW	34.9
ZT1	5	WW	34.1
ZT1	5	Dry	15.8
ZT1	5	Dry	19.8
ZT1	5	Dry	11.5
ZT1	5	Dry	14.3
ZT1	5	Dry	19.9
ZT1	5	Dry	19.3
ZT1	5	Dry	17.5
ZT1	5	Dry	17.1
ZT1	5	Dry	16.1
ZT1	5	Dry	17.1
ZT1	5	Dry	14.7
ZT1	5	Dry	15.8
ZT1	5	Dry	10.6
ZT1	5	Dry	17.1
ZT1	5	Dry	16.2
ZT1	5	Dry	16.7
ZT1	5	Dry	10.4
ZT1	5	Dry	15.8
ZT1	5	Dry	14.5
ZT1	5	Dry	5.6
