# Supplementary material for: Temporal network analysis identifies early physiological and transcriptomic indicators of mild drought in Brassica rapa
Source: eLife journal article supplement (doi:10.7554/elife.29655), 2017-08-18
Supplement: supp [file elife-29655-supp-v1.zip › elife_poa_e29655_Figure_10_source_data_1.xlsx]

## Sheet: Probesets
Figure 10 - source data 1. List of genes selected for gene expression validation using NanoString.
Notes: Sheet two (Normalized_Data_WW) contains normalized data for the well-watered (WW) samples and sheet 3 (Normalized_Data_D) contains the normalized data for the droughted (D) samples. Missing data points represented by 'NA' were removed based on the Z-score cutoff for outlier probes as described in the Materials and Methods section. Data shown in Figure 10 and Figure 10 - figure supplement 1…
Brassica Gene	Arabidopsis ortholog	Annotation	Nanostring Set
Bra037914	AT4G10350	ANAC070	1
Bra022815	AT2G30860	ATGSTF9	1
Bra016459	AT1G20620	CAT3	1
Bra004518	AT2G46650	CB5.C	1
Bra030284	AT2G21660	CCR2	1
Bra000263	AT2G42530	COR15B	1
Bra012230	AT1G20440	COR47	1
Bra026058	AT1G16400	CYP79F2	1
Bra033911	AT3G22840	ELIP1	1
Bra036883	AT4G14690	ELIP2	1
Bra028409	AT5G38480	GRF3	1
Bra028586	AT5G10450	GRF6	1
Bra013183	AT2G05070	LHCB2.2	1
Bra040746	AT4G16690	MES16	1
Bra015665	AT1G77510	PDIL1.2	1
Bra003938	AT1G70940	PIN3	1
Bra039503	AT5G37260	RVE2	1
Bra039113	AT3G01500	CA1	2
Bra004853	AT2G44650	CHL_CPN10	2
Bra025406	AT3G29810	COBL2	2
Bra026649	AT2G01590	CRR3	2
Bra007110	AT3G54900	CXIP1	2
Bra035397	AT5G35560	DENN	2
Bra040120	AT3G04790	EMB3119	2
Bra005677	AT5G01600	FER1	2
Bra035392	AT5G35630	GS2	2
Bra000708	AT4G10340	LHCB5	2
Bra012083	AT5G66570	PSBO1	2
Bra038863	AT3G50820	PSBO2	2
Bra004252	AT1G67740	PSBY	2
Bra006425	AT5G17870	PSRP6	2
Bra008569	AT5G17230	PSY	2
Bra013832	AT4G24770	RBP31	2
Bra000884	AT4G02380	SAG21	2
Bra010116	AT5G62720	imHPP	2
Bra017781	AT4G36750	Quinone	2
Bra021411	AT3G02780	IPP2	Control
Bra010866	AT1G28490	SYP61	Control
Bra015007	AT3G24160	PMP	Control
Bra014841	AT3G54050	HCEF1	Control
Bra020305	AT3G46430	unknown	Control

## Sheet: Normalized_Data_WW
Time	ANAC070	ATGSTF9	CAT3	CB5.C	CCR2	COR15B	COR47	CYP79F2	ELIP1	ELIP2	GRF3	GRF6	LHCB2.2	MES16	PDIL1.2	PIN3	RVE2	CA1	CHL_CPN10	COBL2	CRR3	CXIP1	DENN	EMB3119	FER1	GS2	LHCB5	PSBO1	PSBO2	PSBY	PSRP6	PSY	RBP31	SAG21	imHPP	Quinone
T1	2.85	0.83	12774.3	68.62	139.54	568.56	2482.54	348.31	32.26	1337.89	1279.86	531.7	15245.8	230.66	293.45	NA	3.63	10389.6	545.45	28.67	79.5	844.58	83.7	984.07	140.61	289.2	10836.1	36.19	3296.92	2668.71	961.07	264.14	731.4	NA	49.02	NA
T1	1	6.5	791.61	198.83	1	67.83	495.22	317.76	1797.85	753.52	1668.7	2667.51	7656.89	215.56	157.02	157.95	62.25	25813.6	1076.33	NA	406.58	1038.73	60.33	802.66	87.44	397.83	5121.97	160.88	4061.38	3849.79	1224.1	NA	482.64	NA	NA	NA
T1	2.68	18.79	1065.83	179.88	2.68	34.9	590.64	453.72	1428.27	673.86	2107.5	4553.27	9348.17	NA	257.73	273.84	69.8	29164.3	1099.02	NA	447.12	1275.61	133.38	1256.82	155.93	629.35	5218.91	135.26	5681.06	4972.81	1232.4	NA	574.87	NA	140.9	NA
T1	0.07	5.2	NA	556.16	37.89	178.79	559.97	NA	105.1	731.47	425.07	3113.77	NA	180.63	391.52	112.63	25.46	NA	613.37	58.88	813.29	1043.73	60.09	655.53	161.55	227	NA	61.17	3160.91	5342.48	NA	139.87	1190.61	84.51	36.89	22.97
T1	0.75	0.08	14572.3	103.98	30.39	88.26	815.94	305.22	897.1	717.02	1323.11	803.41	13477	28.25	50.17	32.09	7.03	NA	863.99	49.95	NA	1001.9	53.75	812.01	255.59	NA	2380.76	141.32	NA	3145.66	980.22	335.38	812.24	186.54	NA	29.84
T2	1.49	12.26	8785.6	376.68	371.87	257.72	1416.57	1109.8	1139.82	704.32	2236.45	1362.74	17329.7	91.76	471.4	77.46	22.22	14366.8	906.66	49.14	403.61	1158.77	25.74	679.12	279.02	446.31	4802.97	171.97	4292.32	4185.86	1023.07	275.51	410.05	152.09	70.78	50.31
T2	1.56	13.45	7396.99	398.78	245.02	272.44	923.17	880.72	1311.83	661.32	1344.39	966.49	7496.25	111.23	535.1	115.55	42.62	14162	868.27	60.45	261.01	1100.57	56.78	1119.8	334.53	343.26	4326.45	167.26	4829.24	4925.26	970.95	221.1	851.65	198.2	72.36	36.65
T2	3.15	18.87	8467.88	380.61	412.07	346.01	NA	880.76	2280.54	899.63	1531.89	2138.99	17222	125.82	446.67	110.1	31.46	15109.6	675.98	83.1	290.85	1260.86	43.15	778.25	250.89	321.21	3870.48	127.84	4231.64	4234.83	963.62	206.15	433.07	159.81	59.13	68.72
T2	1.57	15.04	7243.06	268.04	294.67	327.32	819.46	357.63	1183.37	565.89	1538.39	1197.16	7900.84	16.55	489.64	127.03	37.41	12304.3	620.17	43.18	217.23	930	41.52	453.24	179.67	354.83	2509.71	125.55	3098.38	3911.74	829.59	153.26	476.82	113	70.51	27.85
T2	1.55	17.69	22719.4	175.56	262.63	298.03	1046.97	NA	1824.75	NA	1453.77	831.69	11140.2	121.27	242.81	42.62	25.23	27552.3	1594.91	39.05	256.81	1079.93	91.11	614.42	223.8	228.86	4603.22	86.44	2755.34	4240.83	490.73	150.25	483.54	108.29	46.16	34.08
T3	1.53	16.94	6726.41	186.87	NA	594.78	188.9	598.22	1139.82	214.89	401.33	654.95	1344.77	44.92	388.98	86.49	22.22	13277.1	626.08	48.6	206.33	726.31	72	326.81	142.23	325.19	3230.24	154.87	3344.94	2628.28	NA	285.12	1583.07	289.52	87.39	35.45
T3	1.1	13.25	7179.51	270.61	932.23	502.57	1089.08	302.64	432.98	439.61	807.42	1079.14	4217.13	140.28	269.51	46.39	NA	10371	1680.11	54.91	679.61	952.92	62.23	841.88	NA	233.04	1698.41	169.6	3053.96	4281.41	1451.94	516.11	606.4	NA	192.78	89.07
T3	1.52	14.04	21197.2	168.52	74.26	192.77	1035.15	284.47	1605.36	666.55	1022.88	532.7	1771.06	33.52	174.85	87.21	24.84	16094.4	793.55	55.72	267.02	948.01	92.48	1670.29	214.21	399.87	8463.74	NA	3190.37	5628.93	441.23	385.44	1322.17	174.28	58.46	20.85
T3	1.02	NA	10717.9	275.44	535.53	190.94	847.58	317.06	934.9	519.06	976.45	1536.09	1239.45	29.34	NA	163.47	15.75	22835.5	918.06	33.26	582.25	1215.89	53.89	NA	98	863.94	2939.89	106.85	3302.41	4592.42	764.78	283.48	1005.31	108.2	81.78	26.42
T3	1	12.71	13082.3	134.45	1064.79	NA	1723.69	438.63	171.96	359.49	1171.59	1786.94	8610.81	131.59	435.45	113.79	NA	18281.2	819.05	52.14	524.49	961.33	98.46	982.69	NA	317.02	1850.28	190.55	3808.72	4547.34	1199.59	491.21	628.78	214.12	NA	61.57
T4	1	16.82	5092.86	408.48	106.33	92.19	460.97	412.52	31.63	266.49	857.33	1299.46	880.89	131.22	458.95	78.73	NA	19414.4	1117.12	22.97	516.53	357.5	78.87	1216.79	502.66	222.73	656.93	161.2	2583.07	3581.03	1517.08	601.46	753.56	139.97	106.17	55.9
T4	0.37	33.1	9472.57	NA	167.23	471.22	1122.48	NA	675.95	408.35	1574.51	1486.13	13934.4	4.87	230.54	70.55	12.5	22492.7	1961.84	41.58	460.78	1048.83	56.94	959.05	62.17	422.35	NA	137.37	1987.31	779.82	470.08	294.24	969.66	155.03	26.22	18.23
T4	1.05	4.18	22820.2	270.87	357.79	304.21	657.34	83.7	103.57	920.38	385.2	550.26	622.18	NA	64.8	NA	17.46	9931.56	358.91	27.67	187.49	520.97	72.89	722.06	265.71	423.87	NA	226.01	1078.71	4002.15	247.27	323.95	994.67	14.72	40.77	26.96
T4	0.09	4.48	9565.32	381.18	261.29	519.75	348.81	228.34	875.7	505.84	933.58	2987.79	896.05	21.13	418.55	98.21	33.06	21019.9	1210.23	15.15	931.31	1915.97	83.06	2127.74	36.5	583.09	4855.65	90.92	1940.21	4121.78	612.37	326.48	1163.23	146.56	87.62	21.98
T4	NA	36.7	4520.37	422.06	91.75	367.01	2091.97	367.01	42.82	116.22	299.73	819.66	929.76	42.82	318.08	67.29	NA	12267.2	881.15	53.64	528.69	390.77	84.28	551.68	536.35	168.57	911.8	153.24	1532.44	3294.74	850.5	NA	329.47	99.61	68.96	NA
T5	4.41	2.92	3067.05	37.61	NA	12.68	1078.96	97.43	1139.82	108.4	147.66	275.01	291.43	0.93	835.48	148.53	22.22	9076.04	1595.72	73.15	284.8	244.66	84.25	98.64	389.46	317.2	3358.35	178.8	3424.18	2995.44	1362.49	448.27	NA	NA	123.85	55.35
T5	2.74	2.3	NA	51.52	27.12	65.21	2202.71	171.14	33.3	295.92	1426.57	110.73	116.69	89.28	77.29	92.93	5.44	7178.37	713.14	40.65	325.03	695.75	100	NA	317.78	491.35	NA	194.11	1162.46	6749.18	156.54	381.57	1393.58	187.58	72.02	70.28
T5	0.01	2.64	3779.59	34.57	560.43	NA	97.96	34.21	129.98	176.79	340.5	3919.78	8048.1	0.8	62.74	23.24	0.75	20557.4	1495.03	27	444.26	824.56	NA	1338.83	319.66	358.37	3606.35	17.06	936.15	2126.89	1187.78	285.24	1899.17	45.99	70.19	23.4
T5	1.39	9.04	1633.65	14.6	9.04	27.82	200.99	46.6	27.12	127.27	467.35	2505.76	127.27	219.07	216.98	146.74	NA	24802.1	1285.9	80.88	595.24	342.13	100.08	1437.76	291.51	239.72	595.24	126.84	4128.83	2432.15	1517.47	NA	818.09	251.94	NA	87.86
T5	0.03	0.74	9895.12	NA	62.18	99.95	488.56	785.55	50.44	70	149.96	5443.17	5446.26	1.21	100.56	144.94	3.02	34472.7	1373.06	78.34	554	1044.73	NA	943.29	43.63	292.05	NA	105.08	3524.33	655.3	NA	337.94	1437.65	177.42	34.39	14.73
T6	0.14	2.26	2978.08	21.82	606.76	NA	120.9	43.91	107.86	133.87	491.24	NA	NA	7.3	55.18	198.89	0.64	13567.1	NA	18.64	522.62	675.6	139.47	2209.05	NA	259.56	1439.12	69.74	1053.86	1678.67	940.51	209.32	NA	37.69	38.04	21.48
T6	0.03	2.14	16043.8	NA	42.51	140.51	369.67	NA	349.4	305.76	169.07	5002.67	5446.26	6.55	173.78	138.08	8.39	NA	307.85	104.26	872.45	1122.25	NA	1232.89	89.34	385.52	NA	130.54	5536.92	2843.12	NA	316.84	1475.56	199.15	41.41	21.25
T6	0.16	0.2	23259	101.71	38.22	50.69	228.02	597.08	647.2	704.94	596.37	609.29	626	55.25	24.2	21.77	4.29	35800.4	962.66	16.34	NA	1408.79	38.16	175.6	92.92	NA	2061.43	98.98	NA	2443.01	901.29	174.62	813.86	175.17	113.64	14.21
T6	2.07	5.16	864.38	74.36	2.07	34.08	152.84	82.62	118.76	229.26	686.75	2949.42	987.27	241.65	223.07	58.86	NA	19092	1398.35	NA	461.87	370.29	48.58	921.35	72.47	223.77	1882.52	86	3323.08	1708.12	1358.54	NA	355.16	NA	184.75	NA
T6	2.63	1.18	NA	23.91	22.74	233.16	1667.31	162.02	10.58	423.26	931.65	158.37	969.63	170.27	79.47	310.13	0.65	6901.58	653.3	17.87	238.44	611.36	141.49	1356.03	180.97	342.15	9815.83	45.61	1156.85	6003.1	361.08	321.84	682.01	NA	52.12	NA
T7	2.61	1.57	19365.5	30.52	622.65	3.32	1003.63	209.33	1139.82	182.97	430.72	1369.44	13140.9	49.65	603.83	136.43	29.54	25381.7	698.5	148.14	352.74	857.79	76.68	634.72	126.87	433.25	4339.15	171.84	4478.57	4244.69	763.33	593.24	366.68	NA	177.76	NA
T7	0.97	0.04	16442.1	190.28	34.24	160.29	969.53	1015.5	1368.97	883.77	1991.41	1612.52	19453.4	46.99	46.88	41.79	12.38	29284.3	575.05	35.24	768.28	896.11	43.84	155.32	201.43	478.41	1656.36	132.97	NA	2704.64	841.04	235.26	683.18	164.55	NA	24.08
T7	2.59	12.95	939.89	166.57	1	80.27	642.13	303.8	2596.99	1100.42	1956.59	3258.97	8161.24	NA	214.91	189.01	NA	30448.8	693.02	NA	499.67	1109.42	87.62	788.61	173.8	412.77	5029.3	115.87	5061.89	4596.25	1091.31	NA	362.8	NA	113.69	NA
T7	3.53	2.41	18405.6	138.75	224.55	364.09	NA	575.51	5.16	550.77	1152.54	463.68	22556.1	NA	445.32	NA	8.71	13581.8	810.71	42.09	87.31	1270.09	NA	1393.02	240.5	255.92	NA	98.67	3867.94	2802.56	1615.21	324.92	1068.27	NA	64.37	NA
T7	0.01	5.09	7404.73	NA	35.6	234.18	1315.61	1325.4	159.21	333.79	546.19	4262.86	15472.2	179.72	418.48	154.35	42.41	NA	397.89	100.19	NA	1033.81	137.1	649.36	198.74	200.25	NA	67.04	5440.52	5694.53	NA	276.58	1424.99	124.56	76.43	35.82
T8	1.01	8.2	13973.7	163.93	164.85	183.78	2454.83	798.87	1139.82	842.61	NA	1762.67	16534.5	78.23	265.76	75.34	22.22	20955.9	NA	58.75	182.66	1378.63	58.21	912.33	185.21	402.01	2913.28	118.95	4228.14	4921.5	850.89	235.4	769.45	182.64	105.05	33.99
T8	1	8.43	5756.76	103.66	233.44	172.76	2017.52	391.03	1400.64	588.23	933.76	1286.87	12249.2	80.06	541.04	55.62	18.54	20924.6	705.67	98.05	389.52	1303.29	58.69	785.71	188.09	377.51	4511.48	214.1	6154.93	5600	969.13	218.77	402.86	262.79	88.71	NA
T8	1	13.72	6116.97	400.28	294.1	239.81	1582.63	485.59	761.79	464.11	1050.52	1249.76	9130.71	79.94	599.53	46.53	12.53	15058.2	809.72	41.63	443.23	1463.54	31.83	590.15	222.84	341.19	5034.65	208.96	4557.96	4993.02	907.67	210.59	262.83	412.21	87.34	NA
T8	1.38	9.51	4613.13	669.81	213.01	589.35	1124.04	267.08	588.56	1069.83	464.33	522.13	4700.79	NA	79.37	NA	10.04	15715.6	716.32	42.72	69.79	872.41	152.41	895.89	176.97	234.14	5811.65	115.87	4580.33	2265.04	1495.29	408.81	544.8	85.21	37.38	NA
T8	1.65	18.64	7470.54	532.88	308.61	820.9	NA	680.07	1221.43	546.33	2060.46	4280.66	15421.5	62.94	402.76	154.85	42.66	21125.3	559.57	53.5	241.81	719.19	33.49	599.04	174.57	477.24	1302.22	89.96	1870.95	3844.75	865.89	163.38	690.18	102.74	140.64	37.97
T9	2.26	7.51	7404.73	NA	527.2	406.23	549.23	993.96	688.81	554.6	601.49	2092.24	5446.26	7.68	211.65	61.09	10.15	17512.7	NA	51.86	401.28	1409.09	118.19	768.2	139.36	332.83	9895.67	79.03	3330.45	1585.24	485.64	375.83	1083.72	119.52	36.07	33.54
T9	0.59	22.52	6682.74	148.75	411.49	121.63	833.74	436.64	495.44	419.86	514.62	1395.01	941.73	40.41	252.69	68.46	12.27	24641.2	765.12	32.53	757.02	978.26	47.16	2088.58	66.67	NA	2421.4	87.28	3814.33	5955.07	939.8	275.42	1151.71	128.75	61.43	35.59
T9	1.5	10.83	9618.35	NA	525.21	514.79	1139.76	678.74	689.32	333.25	1126.43	2125.17	5446.26	12.73	186.78	92.33	11.31	14939.6	952.61	NA	739.73	1122.08	NA	1556.52	254.53	387.76	3529.09	38.14	2413.53	3284.82	1260.2	363.01	1646.65	129.87	61.01	58.84
T9	3.58	25.06	10203.4	384.48	548.44	171.83	734.59	445.34	168.97	368.01	808.34	1048.9	3667.22	143.91	763.23	75.18	NA	15222.7	743.76	33.78	543.89	637.35	92.9	816.96	612.01	182.99	914.93	185.8	3297.11	4598.27	1071.45	450.42	492.65	136.82	149.77	78.26
T9	1.19	17.36	1061.25	62.26	486.78	176.93	599.59	596.23	1139.82	266.13	986.17	2431.73	35543	41.62	377.06	185.07	30.22	8138.18	1294.86	50.35	330.4	644.48	11.79	589.27	93.94	NA	6444.54	172.13	6763.02	7266.21	975.23	140.28	308.29	311.21	19.5	24.98
T10	0.25	25.47	7404.73	NA	116.01	289.42	1300.57	NA	563.12	298.93	1039.95	1420.57	17612.9	3.45	111.6	30.72	7.67	11940.2	1425.13	58.16	283.04	995.19	79.67	896.38	41.48	420.27	10677.8	88.81	1679.26	444.84	481.26	283.69	848.32	134.17	27.18	17.82
T10	2.43	NA	4561.85	604.85	114.17	245.34	NA	879.33	111.74	218.62	648.57	1612.92	626.71	140.89	706.87	111.74	NA	20396.1	713.16	49.06	450.33	278.61	101.63	1179.26	572.98	187.49	464.34	157.7	2418.1	3220.62	1202.04	NA	530.93	80.6	166.46	89.36
T10	0.51	28.04	21885.6	NA	150.66	420.16	1815.38	1059.02	407.67	452.06	2112.76	2257.57	16097.1	5.15	177.36	98.53	9.75	10831.1	NA	65.6	347.52	1172	102.83	981.2	45.66	347.94	11610.6	135.6	2176.55	542.58	873.12	272.37	1288	187.45	36.65	24.31
T10	0.04	2.77	3973.31	177.96	80.99	415.74	797.95	1044.74	233.99	330.62	229.57	1076.07	625.91	96.68	110.57	146.98	16.7	NA	1423.33	16.02	NA	2103.08	92.71	2473.87	37.13	NA	4427.99	116.06	4182.41	5387.02	670.56	490.75	1312.56	191.26	61.59	39.51
T10	1.07	18.28	587.48	7.27	824.48	225.72	509.46	NA	1175.22	239.3	469.78	454.52	NA	65.48	460.87	255.81	8.77	13248.9	1454.51	53.2	230.77	779.84	7.76	603.99	51.55	694.79	7584.66	168.65	4555.38	9368.62	1318.71	258.37	220.72	NA	42.74	37.39
T11	0.04	2.08	7404.73	NA	69.43	137	543.71	992.7	74.58	84.24	226.38	3405.42	18690.9	6.95	139.82	147.21	7.72	33626.8	725.53	84.12	503.5	956.1	NA	1055.6	52.75	419.79	NA	166.61	3587.65	455.66	2095.93	356.95	1573.54	212.87	46.67	16.82
T11	3.3	2.62	3901.85	14.67	NA	7.02	345.82	49.34	1139.82	45.85	98.74	231.27	125.55	0.9	586.89	151.57	22.22	8299.79	1960.1	97.19	364.33	261.94	88.59	115.34	487.6	322.4	4214.74	158.76	4035.59	3698.68	801.03	357.13	2628.74	NA	103.29	50.83
T11	0.01	0.48	19384	139.23	77.68	81.81	141.88	371.53	363.47	927.04	361.19	683.85	1591.49	34.38	80.31	30.58	8.56	36443.6	939.74	10.92	NA	1450.92	45.17	626.89	23.42	NA	2800.24	126.94	NA	3889.14	887.81	378.68	1222.46	184.78	135.41	16.74
T11	0.03	5.69	7404.73	NA	90.79	205.3	809.84	1007.6	149.63	139.06	581.35	3568.42	7539.95	15.51	139.57	128.1	8.48	27914.3	907.78	77.95	655.89	1271.08	NA	906.28	49.58	338.38	NA	111.35	3679.93	513.39	NA	372.15	1424.44	181.84	56.91	17.95
T11	2.69	35.37	965.8	1.8	572.55	122.15	365.58	NA	NA	130.57	1304.94	70.14	NA	87.91	55.8	13.28	4.74	9817.76	1319.2	66.69	159.11	826	6.11	328.63	65.9	319.36	9094.66	238.52	8494.05	NA	1277.86	228.91	383.15	NA	85.42	37.99
T12	3.24	1.55	4126.3	18	NA	3.29	839.21	147.77	1139.82	216.23	465.13	740.04	2461.01	4.61	545.61	150.69	22.22	8936.88	NA	90.19	270.59	372.83	74.15	383.03	589.15	305.07	3297.46	175.68	3993.38	4364.26	369.28	311.88	NA	NA	139.63	47.62
T12	3.35	NA	936.19	13.93	321.9	109.45	340.35	NA	NA	151.27	1467.33	19.72	NA	102.26	81.2	31.74	2.02	7114.62	1440.94	46.75	309.39	909.16	26.16	363.1	74.66	101.76	9052.94	260.89	NA	8729.33	1415.23	153.93	421.41	NA	88.99	42.24
T12	0	6.43	18961.8	NA	37.57	99.64	436.91	NA	146.44	158.33	496.46	4177.22	13946.6	4.18	199.93	100.43	7.45	NA	364.76	82.42	689.31	916.1	153.19	1156.81	76.32	550.77	NA	118.84	3433.34	2294.21	2115.76	304.21	1182.65	148.42	55.05	13.02
T12	4.9	1.7	2121.55	13.29	NA	8.32	708.07	284.12	1900.55	251.29	508.73	672.11	2090.11	4.52	711.51	114.43	37.05	7941.23	NA	85.13	241.01	390.3	84.34	377.15	553.23	212.53	3317.6	174.51	3730.23	3662.72	338.15	343.54	NA	NA	NA	47.29
T12	4.23	1.44	4193.49	79	NA	1.66	791.07	145.82	1139.82	587.92	1102.22	351.98	1167.55	4.42	597.53	222.83	22.22	29469.7	1171.2	136.61	481.3	396.58	97.95	1163.26	86.3	440	1562.49	134.49	4515.39	2416.54	1539.72	NA	766.68	NA	NA	NA

## Sheet: Normalized_Data_D
Time	ANAC070	ATGSTF9	CAT3	CB5.C	CCR2	COR15B	COR47	CYP79F2	ELIP1	ELIP2	GRF3	GRF6	LHCB2.2	MES16	PDIL1.2	PIN3	RVE2	CA1	CHL_CPN10	COBL2	CRR3	CXIP1	DENN	EMB3119	FER1	GS2	LHCB5	PSBO1	PSBO2	PSBY	PSRP6	PSY	RBP31	SAG21	imHPP	Quinone
T1	0.04	10.34	7404.73	329.22	40.21	121.9	585.19	654.85	236.57	223.82	953.81	3915.54	6705.62	152.63	470.33	150.14	37.65	NA	782.21	90.37	705.59	968.5	96.38	801.35	211.97	425.29	NA	85.36	4446.96	6552.39	NA	272.49	950.31	120.67	63.73	31.14
T1	2.44	1.14	6952	50.91	269.14	235.87	1793.51	475.06	7.93	158.58	1401.14	801.04	16431.3	63.79	357.05	66.4	2.28	13799.1	848.48	42.87	250.12	1399.26	132.83	1028.52	276.05	337.71	11679	244.29	3779.37	4316.44	1353.09	287.88	971.14	NA	82.66	NA
T1	3.64	NA	12907.1	206.37	337.44	161.3	1695.85	743.96	1539.15	830.16	455.63	12.4	23880.5	132.92	196.55	45.79	4.13	9013.21	977.63	49.45	386.36	1816.51	75.44	877.2	215.75	446.25	NA	NA	NA	7003.91	1223.52	172.64	671.78	NA	NA	71.2
T1	0.02	8.8	7404.73	178.31	38.95	98.16	694.28	354.38	288.13	154.6	890.09	4375.36	5446.26	111.19	414.03	204.55	24.06	18000.2	1062	67.93	422.21	1707.24	NA	NA	293.8	725.78	5921.34	143.81	9654.14	4637.26	1000.68	545.07	196.12	156.55	47.94	32.07
T1	3.25	37.63	21271.4	172.05	456.97	115.37	1617.24	1007.5	1389.58	897.71	455.63	14.93	18095	105.81	359.1	165.37	2.84	7529.96	1312.08	52.38	333.03	1636.93	80.32	771.06	220.13	266.02	6132.77	NA	NA	7157.58	1029.27	136.26	609.21	NA	197	54.97
T2	1.31	13.32	8928.96	226.27	426.09	501.12	1102.3	782.85	1139.82	651.74	455.63	1670.38	5743.76	43.92	350.47	154.86	20.67	8661.07	1138.42	54.32	335.68	1137.31	65.3	802.94	236.11	529.52	4849.23	136.63	6900.22	4125.91	1064.18	139.33	533.31	134.72	47.27	32.97
T2	1.64	21.78	NA	85.84	420.07	240.31	2020.28	NA	1890.41	1227.88	2420.05	1416.06	8851.6	163.66	311.08	121.5	42.31	9443.68	2076	52.75	376.3	1105.25	49.94	819.69	268.11	334.96	3653.43	159	4913.24	5297.45	1383.98	217.76	678.77	162.55	50.58	37.97
T2	1.47	14.67	2338.97	162.18	365.07	168.06	1390.31	609.46	1166.88	556.64	1404.03	1560.13	12958.3	95.43	414.01	109.19	29.02	19392.5	1090.62	84.92	358.23	1530.32	67.41	910.7	254.37	378.06	4432.65	178.92	5924.79	5118.32	1299.22	173.2	697.64	155.18	64.62	41.59
T2	1.48	17	11995.6	290.14	428.33	405.06	1249.98	275.47	1139.82	723.49	1027.61	1593.53	6837.49	66.36	365.51	104.59	26.69	15626.2	934.57	62.12	346.61	1366.95	61.38	1006.97	267.78	409.62	4717.15	120.86	6988.61	4003.23	1312.1	193.91	718.42	148.08	41.97	39.44
T2	1.26	12.11	4850.37	339.71	574.85	353.2	1061.52	503.05	1101.24	787.39	784.62	1668.91	14346	135.75	360.73	105.97	35.17	19677.7	947.01	60.03	266.2	1474.63	74.4	920.53	244.26	396.67	4356.81	168.69	5851.37	4975.81	1439.36	244.18	983.14	133.91	59.14	65.58
T3	1.48	20.27	1893.98	83.15	445.49	208.45	730.73	892.9	1139.82	368.32	1107.65	2222.73	38385.9	58.32	162.53	78.45	30.46	10986.9	1630.1	66.8	319.15	647.35	20.11	591.14	126.77	NA	6323.02	178.62	1946.08	9296.83	1260.26	149.05	425.53	329.5	19.33	31.21
T3	1.55	22.57	1597.9	137.62	298.01	182.97	956.81	447.98	1139.82	423.12	1605.41	2894.11	30300.2	96.1	125.81	27.18	40.25	18202.2	1215.4	66.19	346.78	878.71	18.57	617.49	114.22	NA	6326.81	180.62	4840.1	NA	1260.7	189.53	468.52	319.2	37	27.89
T3	0.3	13.25	6983.46	274.24	272.68	653.19	868.73	586.34	1135.32	309.39	936.66	571.32	9384.37	31.45	219.27	54.2	35.7	20219.5	630.93	90.7	176.37	453.49	52.75	1953.42	256.12	616.9	2711.67	162.16	9515.45	4632.3	1072.89	290.22	2436.44	215.57	32.63	27.65
T3	2.04	17.74	30350	535.02	211.14	230.01	1279.91	396.38	2010.67	397.65	917.2	663.74	2849.4	47.99	220.01	87.41	36.64	13443.1	749.97	NA	484.85	888.58	88.97	933.33	101.97	368.08	4015.24	51.97	2800.32	3071.85	1135.56	271.41	1264.88	98.29	71.84	33.03
T3	2.25	8.27	7404.73	NA	408.72	219.84	676.41	517.9	1615.66	672.84	660.38	1811.31	5446.26	12.4	228.94	65.46	13.63	12500.8	NA	40.34	327.62	1041.74	98.11	979.71	107.48	456.95	8030.27	142.81	2668.21	1320.09	720.91	305.35	1218.57	154.23	35.09	23.75
T4	1.32	18.43	734.03	15.11	368.75	122.38	686.38	1355	1139.82	265.02	747.06	341.32	NA	58.14	290.34	189.62	11.35	15901	1257.67	63.15	228.04	694.25	7.54	487.02	50.91	796.82	5235.44	112.6	5394.5	8903.97	1454.86	201.7	267.9	NA	26.47	29.63
T4	1.12	18.64	224.84	12.23	488.5	103.79	675.44	409.73	1139.82	236.02	580.89	374.68	NA	69.49	354.59	125.15	15.5	20008.2	1485.01	70.67	271.65	770.26	9.73	509.81	47.69	NA	4378.92	221.15	NA	9950.51	1502.83	247.38	348.54	428.54	26.01	38.1
T4	2.18	7.18	NA	46.21	575.49	454.14	1061.12	328.43	280.89	412.2	1006.34	1538.98	576.64	41.45	191.76	53.93	12.04	10285.4	481.87	44.96	385.97	661.37	84.29	1208.33	297.2	450.63	11608.1	NA	1128.43	6138.49	168.56	381.32	1211.89	90.86	56.09	NA
T4	0.26	30.67	7404.73	NA	166.83	235.77	1284.96	666.47	610.73	179.9	1383.1	1391.18	9262.07	4.83	173.89	48.63	11.38	34409.6	NA	57.64	436.49	1002.6	84.19	1179.15	65.99	528.37	NA	140.12	2243.68	782.55	700.87	338.7	1017.85	160.3	35.18	19.79
T4	2.06	9.28	NA	105.19	185.51	363.33	726.23	258.78	461.61	550.37	1348.36	2281.99	25029.8	98.76	87.59	6.91	1.45	21845.8	545.82	124.65	216.5	230.24	56.59	NA	364.69	577.13	4274.63	201.33	NA	7182.2	996.29	323.66	2048.33	239.05	14.88	25.59
T5	0.02	0.27	14336.3	138.35	80.65	54.46	258.47	225.6	420.92	579.41	291.44	1142.49	250.05	62.63	66.55	17.26	5.2	28647.1	915.57	10.68	917.17	1439.74	64.08	767.17	30.78	NA	2894.69	74.96	5610.65	2439.23	663.78	254.96	987.05	139.69	112.27	11.09
T5	0.3	3.58	NA	242.76	57.83	838.53	63.49	89.52	341.92	929.15	879.45	3776.73	738.23	5.93	17.89	3.31	0.27	19397.2	577.58	126.44	170.19	171.07	NA	NA	242.48	NA	4273.73	106.06	6340.39	5485.25	548.38	264.8	371.47	159.4	8.73	11.73
T5	3.17	NA	242.72	3.68	217.33	78.68	398.1	275.47	1139.82	147.19	455.63	37.27	NA	109.54	67.28	20.42	5.62	19479.1	1712.94	73.51	314.61	781.1	8.86	406.13	56.53	683.57	NA	294.77	NA	NA	1753.51	296.73	565.95	NA	94.42	54.9
T5	1.28	4.37	NA	60.44	77.7	365.36	67.97	79.17	162.64	1031.27	1420.46	3933.82	1585.3	10.21	9.8	0.72	0.36	19277.9	822.4	NA	149.85	208.89	161.73	NA	261.8	847.41	5386.81	160.6	9967.07	5483.69	832.62	527.68	751.76	194.93	12.23	13.64
T5	0.02	4.82	4355.97	42.92	661.91	NA	83.77	23.4	55.69	182.54	177.55	5587.11	18354.4	1.18	75.52	53.01	0.28	23734.4	NA	83.76	548.59	1079.5	172.9	2274.3	NA	483.79	4811.69	25.89	1235.65	2722.39	1697.91	303.56	2544.8	57.06	94.53	26.64
T6	1.28	6.17	NA	107.07	47.56	46.23	30.8	186.21	153.58	1285.07	594.25	3652.35	2503.02	11	3.35	10.44	1.52	19378.5	779.92	NA	197.38	626.71	NA	NA	271.46	NA	5149.39	86.85	6337.52	5951.71	619.74	NA	1669.8	167.75	14.62	14.08
T6	0.13	0.06	15057.7	120.62	45.67	83.19	193.16	252.9	524.22	470.97	559.09	1051.59	1371.21	23.4	34.17	25.91	6.57	NA	1075.26	17.17	NA	1450.03	79.66	658.15	124.36	NA	2775.98	88.13	NA	3253.47	886.65	254.09	890.07	167.08	NA	14.23
T6	0.8	6.67	NA	480.91	37.86	138.43	33.54	176.45	237.66	1309.06	1489.05	4964.9	914.02	12.47	8.27	10.12	2.64	13861.7	909.34	NA	176.25	630.58	NA	NA	256.36	NA	4999.92	91.79	8667.95	5233.57	525.39	NA	281.08	139.69	15.61	17.6
T6	3.13	1.22	NA	64.7	52.81	236.02	2060.35	186.41	5.36	142.81	1115.72	299.71	1464.21	172.35	108.34	89.69	1.15	6484.31	683.46	19.96	181.92	690.73	129.61	1798.01	174.33	329	10874.5	42.45	1004.98	5082.37	420.84	344.49	673.27	NA	59.64	NA
T6	0.14	3.58	6639.35	32.96	651.78	NA	261.81	108.23	16.02	286.78	342.55	4982.82	27282	8.87	139.42	78.79	0.42	22364.5	NA	53.03	425.7	1207.2	169.44	2221.46	NA	408.25	2773.61	71.33	1609.14	3023.08	1122.35	210.99	2389.46	64.11	69.13	19.64
T7	2.92	1.5	13689.7	67.77	208.05	231.47	1897.53	568.78	3.5	186.75	1676.1	679.02	14065.6	56.34	310.48	117.29	3.65	13705.9	809.58	42.04	164.78	1155.02	NA	1402.82	213.92	210.51	10323.6	100.17	3604.64	2880.2	1235.47	384.07	728.88	NA	67.69	NA
T7	0.77	0.12	16977.9	236.13	33.81	216.87	77.85	203.86	1385.72	759.29	1938.45	1460.1	22894	18.87	42.23	34.52	13.66	33481	827.92	42.38	923.56	1151.57	62.01	803.02	263.05	388.13	2174.18	161.38	NA	3447.7	906.56	229.86	854.27	167.97	NA	29.95
T7	2.1	2.14	18622.3	12.38	1111.03	40.68	384.75	332.23	NA	129.06	473.89	1430.41	21645.5	57.81	677.24	103.63	60.4	14023	NA	71.52	132.21	808.03	64.37	1001.88	NA	306.81	2632.62	83.81	4060.06	5555.23	1324.97	NA	2240.53	199.85	NA	26.4
T7	2.43	32.58	16998.6	140.1	502.08	77.6	1478.72	275.47	1139.82	752.82	455.63	13.05	22688.5	143.06	244.93	99.53	4.07	20870.1	NA	101.36	512.6	1360.67	111.36	NA	NA	206.18	1978.52	175	4140.51	6395.64	874.82	252.53	2434.13	134.76	42.78	35.62
T7	4.23	10.91	10368.1	161.21	37.27	139.21	177.07	369.09	424.24	813.88	1063.19	2047.8	3860.57	14.51	14.26	135.91	11.5	17885.5	705.81	92.88	282.41	1704.49	168.81	NA	145.58	NA	3743.24	56.49	6369.22	2582.74	942.14	NA	694.19	155.18	38.72	29.65
T8	1.54	23.94	9230.75	251.31	407.9	465.33	313.02	819.65	1288.53	638.5	2150.4	5229.55	25535	75.85	402.36	193.23	34.28	32826.4	695.9	71.07	300.47	1011.49	46.32	1639.41	256.37	595.21	1675.98	152.75	7968.49	4842.98	1044.07	226.04	844.41	121.03	NA	46.66
T8	1.37	13.86	16793.3	265.5	552.07	248.38	1425.17	563.51	1139.82	989.12	455.63	1492.92	5426.41	78.81	467.97	134.23	23.01	11781.6	931.35	42.77	295.58	1226.35	58.95	857.46	225.29	573.34	5061.95	132.54	NA	5096.5	904.73	152.48	568.1	140.81	68.58	33.62
T8	0.85	8.16	2089.12	569.96	303.18	400.34	701.27	338.66	736.01	242.24	585.78	1412.81	11872.3	146.17	290.5	228.21	23.39	15994.2	666.14	43.39	147.03	1011.9	42.62	787.65	133.87	214.16	3342.1	322.12	5409.62	2918.74	1068.32	154.28	636.17	91.12	37.74	NA
T8	2.62	28.65	17390.1	176.05	219.94	183.35	1460.66	1265.5	2007.6	490.37	NA	NA	30074.6	78.71	443.5	86.85	30.63	13469.9	739.35	70.24	356.33	963.32	106.68	1175.97	636.52	304.24	1796.66	156.02	5406.69	4242.26	820.94	214.17	720.74	178.19	45.01	39.2
T8	1.57	12.96	2659.6	314.91	275.57	181.29	776.91	718.7	1209.25	443.98	692.31	1033.79	22185.6	92.61	328	159.8	20.39	14412.8	858.34	86.15	279.3	1706.54	46.13	924.31	186.47	619.11	3822.35	68.15	3585.92	3172.29	1241.16	NA	1164.04	151.16	58.83	37.53
T9	1.88	17.7	NA	311.29	292.85	353.14	993.37	406.32	1605.78	485.64	948.51	873.41	5810.77	29.3	278.84	30.5	52.57	16486.6	603.16	60.72	211.09	976.64	89.27	2080.71	165.95	352.26	9733.87	NA	2891.78	4011.97	400.17	474.62	1006.59	146.78	44.31	72.89
T9	1.76	9.21	28946.6	109.61	390.73	94.65	2439.48	402.08	1287.89	495.17	987.64	1658.34	8083.2	55.6	330.38	55.56	12.15	11183.8	675.24	NA	230.26	479.64	42.76	1964.22	187.3	469.17	2979.54	102.87	10486.6	3720.79	1256.99	274.29	NA	185.66	30.06	32.28
T9	0.73	34.34	11355.5	471.52	678.27	452.36	1691.39	553.62	1254.01	512.13	1894.84	3125.69	15307	153.7	NA	146.61	25.51	31061.5	817.3	34.64	718.63	1166.42	55.14	NA	92.17	814.25	1681.06	86.65	2988.86	3966.36	718.62	296.75	1217.97	82.57	82.87	32.66
T9	2.05	10.09	28924.4	460.19	390.58	99.35	2205.41	443.86	1376.48	499.16	758.75	2118.24	11982.5	49.85	523.96	53.7	10.03	15477.6	643.95	108.86	200.04	533.25	42.25	2120.64	233.54	NA	3105.8	121.43	8980.25	4598.04	1021.82	649.53	NA	224.41	35.03	37.57
T9	1.11	19.35	1443.68	102.66	739.26	518.08	827.07	333.99	1139.82	255.61	552.43	1270.88	29559	51.33	312.94	124.97	38.04	10210.7	1131.2	35.14	377.34	771.88	15.74	747.6	88.84	NA	5403.85	180.58	NA	NA	870.46	166.11	469.18	352.59	35.04	29.91
T10	1.57	9.4	NA	134.81	777.2	701.91	1350.86	348.38	262.87	424.72	1501.05	1451	1004.88	NA	204.5	266.74	23.68	9363.49	424.91	35.77	233.22	521.54	84.14	632.8	195.03	325.69	NA	NA	917.92	4775.81	178.18	286.02	922.13	110.67	42.98	66.16
T10	1.09	22.81	1000.31	7.85	543.24	102.96	735.71	769.95	1139.82	390.43	455.63	359.37	NA	70.01	452.75	176.25	11.13	15987.8	1235.83	55.12	230.62	712.16	7	530.23	51.14	NA	6027.25	149.15	6784.19	9125.19	1168.67	230.02	288.72	383.67	48.07	32.74
T10	1.86	7.8	NA	133.83	187.02	693.42	815.51	303.47	488.11	449.12	1404.79	2597.84	28234.5	110.93	99.61	16.67	1.23	18433	489.5	154.94	204.75	209.17	59	NA	313.5	652.76	4066.25	146.62	10723.8	6613.48	1107.01	405.31	1828.24	240.54	15.98	27.43
T10	2.5	7.62	NA	81.05	201.17	349.95	1454.09	275.23	1864.97	501.33	1031.44	1827.78	30840	125.54	75.86	18.74	1.58	11819.9	507.36	96.6	153.66	193.46	34.37	NA	258.26	564.27	3781.12	101.2	8969.54	6347.09	1119.7	355.84	2039.39	210.98	9.28	33.4
T10	0.06	2.33	8194.01	413.06	217.89	NA	561.24	1102.23	704.9	219.13	682.58	2813.69	2520.35	34	822.37	170.77	42.91	26754.5	1079.12	10.92	NA	1382.27	70.85	NA	38.8	528.12	1954.5	94.07	2306.7	5672.05	568.95	272.8	1487.69	147.07	111.83	23.83
T11	4.44	2.53	NA	38.98	119.93	NA	2047.68	208.2	36.5	NA	2714.81	451.13	767.36	NA	132.59	305.54	7.27	11462.6	1022.95	70.85	293.94	728.68	177.76	NA	255.55	638.94	NA	NA	1923.72	6439.62	231.06	638.1	1557.09	349.94	93.29	NA
T11	0.02	3.08	4749.19	55.57	574.23	NA	137.19	67.86	146.22	186.09	144	2446.96	7726.43	1.11	68.9	22.31	0.29	21781	NA	72.28	544.84	1025.65	180.1	1439.97	652.27	330.77	3365.75	20.39	979.66	2558.87	869.56	287.47	2219.02	59.84	62.37	31.8
T11	1.14	5.5	NA	86.65	87.14	224.48	131.44	131.63	341.09	1112.82	1553.47	4093.69	2075.11	7.12	14.69	2.37	0.41	14913.5	798.59	NA	175.08	208	143.47	NA	241.51	NA	4883.44	137.01	10022.8	5071.12	989.84	NA	939.56	211.98	11.93	15.88
T11	0.89	4.85	NA	219.48	96.98	NA	166.46	105.09	226.16	NA	1325.19	3821.81	4088.07	18.05	16.17	3.75	0.4	14935.8	578.45	NA	190.49	222.95	110.4	NA	218.68	837.49	3805.44	62.57	7482.54	4010.93	677.96	610.05	593.11	205.33	10.25	11.7
T11	0.02	0.75	17415.3	78.1	82.66	60.81	145.9	764.12	358.43	669.64	254.41	652.22	331.9	70.71	53.34	12.13	3.31	20160	1057.76	12.13	NA	1495.52	60.58	454.87	32.34	NA	2677.87	71.03	5468.57	3031.56	708.95	277.64	1117.48	153.24	113.24	13.6
T12	3.1	NA	2210.42	24.03	158.34	321.45	582.69	872.75	1805.58	218.85	721.76	38.8	NA	134.13	243.29	62.44	3.64	20413.8	NA	22.13	684.01	1040.53	NA	1835.7	NA	342.57	2239.1	61.28	1572.77	3177.08	733.21	251.6	NA	55.83	56.26	18.03
T12	0.1	0.18	17196	146.23	55.05	115.5	351.25	306.59	711.3	690.37	622.67	1304.08	1037.8	28.37	18.64	23.59	7.02	NA	962.09	20.58	NA	1323.42	62.67	397.8	106.57	NA	2271.59	114.01	10452.4	3474.55	987.68	290.63	1146.79	167.71	NA	17.06
T12	0.92	6.14	NA	65.08	50.27	449.59	61.27	175.87	158.72	1080.66	1239.26	4709.34	2646.98	12.8	6.23	16.49	1.76	13863.8	877.14	NA	278.77	661.42	165.41	NA	255.61	NA	5271.01	69.02	7529.9	4565.59	787.09	NA	529.61	212.57	16.21	17.89
T12	0.1	7.76	6195.5	34.83	597.77	NA	179.68	61.35	13.49	268.94	251.95	4793.32	NA	9.24	97.18	56.84	0.06	19630.9	NA	27.45	581.47	1133.69	NA	1700.11	NA	333.59	1854.3	63.72	1527.24	2675.98	754.7	198.28	2168.32	68.26	55.03	24.1
T12	0.82	7.1	NA	109.55	49.58	189.2	94.54	208.01	272.86	1235.57	2208.18	5097.23	1748.96	15.7	4.04	12.34	2.95	11860	798.62	NA	202.2	579.29	NA	NA	233.13	870.22	4705.45	102.07	9775.2	4905.46	761.27	NA	249.06	156.22	16.93	19.46
