# Supplementary material for: Temporal network analysis identifies early physiological and transcriptomic indicators of mild drought in Brassica rapa
Source: eLife journal article supplement (doi:10.7554/elife.29655), 2017-08-18
Supplement: supp [file elife-29655-supp-v1.zip › elife_poa_e29655_Supplementary_File_1.xlsx]

## Sheet: WW_Network
Supplementary File 1. WGCNA network gene lists with module membership and gene significance for each physiology measure.
Notes: WW_network lists all the genes in the well-watered network with their corresponding module, module membership with associated p. value and the gene significance score for each trait. The same information is listed for the drought network in the D_network sheet.
ID: unique ID generated by the Tophat alignment program during RNAseq read mapping to the Chiifu reference genome; GS: gene significance; p.GS: student asymptotic p-value for the gene significance correlations; MM: module membership; p.MM: student asymptotic p-value for the module membership correlations.
ID	Gene	Ath_ortholog	Module	GS.FV_FM	p.GS.FV_FM	GS.GasExchange	p.GS.GasExchange	GS.Photosynthesis	p.GS.Photosynthesis	GS.Starch	p.GS.Starch	GS.Sugars	p.GS.Sugars	MM.tan	p.MM.tan	MM.royalblue	p.MM.royalblue	MM.lightyellow	p.MM.lightyellow	MM.darkmagenta	p.MM.darkmagenta	MM.plum1	p.MM.plum1	MM.green	p.MM.green	MM.skyblue	p.MM.skyblue	MM.greenyellow	p.MM.greenyellow	MM.darkturquoise	p.MM.darkturquoise	MM.orangered4	p.MM.orangered4	MM.white	p.MM.white	MM.turquoise	p.MM.turquoise	MM.darkgreen	p.MM.darkgreen	MM.paleturquoise	p.MM.paleturquoise	MM.darkgrey	p.MM.darkgrey	MM.violet	p.MM.violet	MM.saddlebrown	p.MM.saddlebrown
XLOC_000011	Bra011871	AT4G39200	M1	0.566321	0.00391474	0.625935	0.00106912	0.612126	0.0014774	-0.488966	0.0153199	0.631301	0.00093896	-0.545098	0.0058764	-0.665109	0.000390983	0.395527	0.0557368	-0.134838	0.529885	-0.00520718	0.980734	0.859034	7.7266e-08	-0.884044	1.01769e-08	-0.00776121	0.971288	0.0138658	0.948727	0.327467	0.118279	-0.163646	0.444823	0.839165	2.98978e-07	-0.415342	0.0435543	-0.680856	0.00025027	-0.298778	0.156131	-0.599321	0.00196856	0.458704	0.0241635
XLOC_000030	Bra011844,Bra011846	NA	M1	0.494107	0.0141224	0.528701	0.00790427	0.51601	0.00984699	-0.280135	0.184892	0.272285	0.198027	-0.455826	0.0251832	-0.566939	0.00386714	0.432592	0.0347461	-0.0153148	0.943377	0.0937682	0.662976	0.724124	6.32269e-05	-0.794347	3.57436e-06	-0.0464878	0.829221	-0.175581	0.411845	0.236262	0.266361	-0.566393	0.00390916	0.685323	0.000219452	-0.466947	0.0214249	-0.0789432	0.713866	-0.219168	0.303499	-0.519361	0.00929924	0.340263	0.103753
XLOC_000031	Bra011843	AT4G39660	M1	-0.153646	0.473497	-0.262465	0.215333	-0.182677	0.392894	0.32615	0.119854	-0.0300858	0.889013	0.124527	0.56208	0.220381	0.300762	-0.0369437	0.863923	0.380547	0.066581	-0.145491	0.49756	-0.0859337	0.689706	-0.005947	0.977998	-0.266308	0.208444	0.206814	0.332232	0.0237336	0.912347	0.0262136	0.903228	0.15415	0.472029	0.483024	0.0168063	0.0105214	0.961084	-0.409052	0.0471698	-0.204272	0.338342	-0.216212	0.31023
XLOC_000041	Bra011825	AT4G39880	M1	-0.118473	0.581385	-0.232474	0.274329	-0.181904	0.394934	0.10137	0.637414	0.0860275	0.689384	-0.0800477	0.710031	0.262853	0.21463	0.0276642	0.897899	0.549747	0.00538811	-0.169688	0.427955	0.0415165	0.847262	-0.582472	0.00282144	-0.849396	1.52573e-07	0.771209	1.02756e-05	0.162767	0.447307	-0.156092	0.466397	0.781683	6.47101e-06	-0.561699	0.0042865	-0.184441	0.388262	-0.291333	0.167211	-0.841282	2.61132e-07	0.693993	0.000168936
XLOC_000044	Bra011820	AT4G39960	M1	0.732538	4.69726e-05	0.632306	0.000916168	0.70699	0.0001122	-0.333029	0.111793	0.707059	0.000111951	-0.779604	7.10699e-06	-0.570061	0.00363415	0.610597	0.00152989	-0.332312	0.112614	0.416355	0.0429927	0.66683	0.000372842	-0.826174	6.58973e-07	-0.0354289	0.869455	0.0822055	0.702556	-0.13005	0.544726	-0.187271	0.380895	0.721089	7.01988e-05	-0.52085	0.00906405	-0.458775	0.0241386	-0.258233	0.223096	-0.396871	0.0548352	0.447263	0.0284246
XLOC_000057	Bra011794,Bra011795	NA	M1	0.170058	0.426935	0.0770633	0.72041	0.128997	0.548015	-0.0774772	0.718968	0.356116	0.0876394	-0.321	0.126159	-0.103887	0.629037	0.183268	0.391338	0.342675	0.10117	-0.142562	0.506351	0.395442	0.0557941	-0.829869	5.29874e-07	-0.636481	0.00082649	0.608899	0.00159003	0.234424	0.270207	-0.143333	0.50403	0.946543	2.73863e-12	-0.538368	0.00664845	-0.491069	0.0148205	-0.460905	0.023406	-0.890241	5.73045e-09	0.628106	0.0010147
XLOC_000058	Bra011792	AT4G37870	M1	0.262442	0.215375	0.367879	0.076953	0.298434	0.156631	-0.310237	0.140106	0.265656	0.209603	-0.297508	0.157983	-0.46107	0.02335	0.367484	0.0772955	0.244008	0.250535	-0.267042	0.207145	0.725722	5.98057e-05	-0.874478	2.32407e-08	-0.310297	0.140025	0.119354	0.57856	0.470967	0.0201838	-0.504383	0.0119584	0.896702	3.03276e-09	-0.415116	0.04368	-0.343862	0.0999165	-0.43785	0.0323636	-0.800894	2.58755e-06	0.414522	0.0440129
XLOC_000070	Bra011770	AT4G37510	M1	-0.119658	0.577586	-0.184766	0.387412	-0.135756	0.52706	0.156983	0.463825	0.165325	0.440102	-0.025959	0.904164	0.160087	0.454921	-0.193793	0.364221	0.348131	0.0955029	-0.310253	0.140085	0.0688941	0.749064	-0.426922	0.0374694	-0.555595	0.00482266	0.749168	2.52555e-05	0.245564	0.247433	0.37054	0.0746789	0.609054	0.00158446	-0.377777	0.0687524	-0.629193	0.000988368	-0.261081	0.217851	-0.65388	0.000529205	0.566371	0.00391085
XLOC_000088	Bra011734	AT4G37000	M1	-0.381815	0.0656052	-0.291068	0.167614	-0.357311	0.0865058	-0.161261	0.451577	0.0085341	0.96843	0.408576	0.0474524	0.188984	0.376474	-0.39239	0.0578861	0.616914	0.0013229	-0.65421	0.000524614	0.144346	0.50099	-0.24041	0.257808	-0.458745	0.0241491	0.416963	0.0426586	0.741708	3.35522e-05	0.0543094	0.801008	0.467409	0.0212792	-0.28592	0.175604	-0.468963	0.0207951	0.0652334	0.762012	-0.6827	0.000237123	0.53171	0.00749385
XLOC_000091	Bra011728	AT4G37090	M1	0.508091	0.011248	0.48544	0.0161883	0.504088	0.0120165	-0.4667	0.0215032	0.609338	0.0015743	-0.504763	0.0118839	-0.472922	0.0196014	0.358151	0.0857156	0.0578027	0.788483	0.0586478	0.78546	0.751194	2.33413e-05	-0.917973	2.65715e-10	-0.238667	0.261381	0.159327	0.457095	0.29957	0.154984	-0.277191	0.189746	0.927548	7.09892e-11	-0.532295	0.00741623	-0.554065	0.00496558	-0.240557	0.257509	-0.739826	3.59911e-05	0.616483	0.00133622
XLOC_000094	Bra011723	AT4G37130	M1	0.0710548	0.741452	0.0938166	0.662812	0.0767188	0.721612	-0.151035	0.481138	0.158011	0.460866	-0.202222	0.343315	-0.153485	0.473967	0.13913	0.516742	0.453604	0.0259941	-0.279634	0.185712	0.436821	0.0328193	-0.786472	5.1941e-06	-0.588831	0.00246869	0.359999	0.0839955	0.36773	0.0770822	-0.438514	0.0320721	0.884396	9.85891e-09	-0.299217	0.155495	-0.24415	0.250251	-0.623407	0.00113561	-0.882417	1.17697e-08	0.356176	0.0875823
XLOC_000128	Bra011677	NA	M1	0.551372	0.0052257	0.454119	0.0258045	0.511376	0.010648	-0.438564	0.0320506	0.66105	0.000436813	-0.705964	0.000115976	-0.360011	0.0839848	0.572814	0.00343865	-0.213494	0.316499	0.350901	0.0927178	0.444418	0.0295722	-0.766874	1.23566e-05	-0.309655	0.14089	0.28022	0.184753	-0.207691	0.33014	-0.330453	0.114764	0.70798	0.000108662	-0.514589	0.0100872	-0.394557	0.0563946	-0.433549	0.0343027	-0.466329	0.0216211	0.385061	0.063156
XLOC_000147	Bra011645	AT4G35860	M1	0.248562	0.241522	0.484406	0.0164505	0.348312	0.0953192	-0.490041	0.015063	0.24452	0.249511	-0.0939662	0.662305	-0.522297	0.00884038	0.15873	0.458802	0.144433	0.500727	-0.294853	0.161906	0.79267	3.8756e-06	-0.612326	0.00147068	0.0740866	0.730811	-0.227937	0.284067	0.683093	0.000234397	-0.313706	0.135495	0.635112	0.000855036	-0.303188	0.149817	-0.371629	0.0737632	0.0697502	0.746045	-0.546689	0.00570529	0.458632	0.0241884
XLOC_000155	Bra011624	AT4G35570	M1	0.200446	0.347661	0.231003	0.277462	0.212349	0.319162	-0.296433	0.159563	0.407485	0.0481058	-0.226499	0.287198	-0.214814	0.313445	0.105476	0.62377	0.299819	0.154624	-0.16446	0.442531	0.541534	0.00627541	-0.766371	1.2621e-05	-0.40907	0.0471587	0.327243	0.118545	0.450694	0.0270878	-0.140287	0.513227	0.880381	1.40766e-08	-0.53565	0.00698344	-0.490232	0.0150177	-0.129702	0.545811	-0.814168	1.29438e-06	0.730595	5.0357e-05
XLOC_000163	Bra011604	AT4G35300	M1	0.33959	0.104483	0.402707	0.0510504	0.373599	0.0721282	-0.333713	0.111014	0.354652	0.0890437	-0.358353	0.0855257	-0.459562	0.0238658	0.256528	0.226274	0.178179	0.40485	-0.185029	0.386724	0.730205	5.10622e-05	-0.905898	1.13638e-09	-0.296968	0.158776	0.169863	0.427473	0.448429	0.0279642	-0.364427	0.0799806	0.907217	9.79108e-10	-0.53586	0.00695707	-0.526619	0.0081991	-0.36546	0.0790657	-0.812351	1.4276e-06	0.52092	0.00905315
XLOC_000167	Bra011599	AT4G35260	M1	0.255495	0.228214	0.281813	0.182163	0.267509	0.206321	-0.495434	0.0138262	0.317257	0.13089	-0.14463	0.500137	-0.254655	0.229799	0.160421	0.453968	0.107383	0.617475	0.027653	0.89794	0.482172	0.0170286	-0.460885	0.023413	-0.0740903	0.730798	-0.0811323	0.70627	0.335206	0.109327	-0.343786	0.0999968	0.479402	0.0177685	-0.403311	0.0506709	-0.149211	0.486511	0.207899	0.329646	-0.411886	0.0455127	0.504195	0.0119954
XLOC_000189	Bra011546	AT4G34620	M1	-0.266336	0.208394	-0.342266	0.101605	-0.309878	0.140589	0.0975633	0.650167	0.0847088	0.693919	0.099435	0.643885	0.3532	0.0904525	-0.221333	0.298626	0.661122	0.00043596	-0.372845	0.0727509	0.00215042	0.992043	-0.488603	0.0154075	-0.851985	1.27684e-07	0.847672	1.71465e-07	0.3514	0.092223	0.0668818	0.756174	0.754783	2.02625e-05	-0.4518	0.026668	-0.425148	0.0383554	-0.266663	0.207815	-0.887058	7.72881e-09	0.698728	0.00014589
XLOC_000190	Bra011543	AT4G34570	M1	0.258474	0.222649	0.286501	0.174688	0.290385	0.168659	-0.230977	0.277517	0.382356	0.0651922	-0.342963	0.100865	-0.31636	0.132042	0.170929	0.424535	0.151115	0.480901	-0.174248	0.41546	0.532166	0.00743327	-0.73514	4.27539e-05	-0.315124	0.133642	0.307278	0.144126	0.270116	0.201765	-0.0955707	0.656881	0.794792	3.49799e-06	-0.193137	0.365878	-0.621355	0.00119218	-0.578707	0.00304985	-0.687924	0.000203074	0.302919	0.150198
XLOC_000196	Bra011530	AT4G34412	M1	0.109982	0.608936	0.0953128	0.657752	0.106746	0.619575	-0.103	0.631986	0.21857	0.304852	-0.152155	0.477853	-0.117372	0.584928	-0.00858358	0.968247	0.469065	0.0207635	-0.233108	0.272984	0.458983	0.0240663	-0.746981	2.74759e-05	-0.504462	0.011943	0.36557	0.0789685	0.44833	0.0280034	-0.185368	0.385839	0.873366	2.54693e-08	-0.375252	0.070778	-0.3831	0.0646273	-0.326872	0.118988	-0.873198	2.58224e-08	0.567261	0.0038425
XLOC_000201	Bra011516	AT4G34270	M1	0.0126248	0.953311	-0.0400132	0.852732	0.016525	0.938911	-0.0145822	0.946082	0.230945	0.277587	-0.0050333	0.981378	0.174901	0.413685	-0.141919	0.50829	0.111714	0.603272	0.114326	0.594773	-0.0596534	0.781867	-0.00318304	0.988223	-0.128415	0.549839	0.155717	0.467484	-0.0132441	0.951024	0.20732	0.331024	0.102384	0.634035	0.0454215	0.833084	-0.142294	0.507159	0.110098	0.608555	-0.0933459	0.664407	0.213055	0.317519
XLOC_000205	Bra011507	AT4G34215	M1	0.494316	0.0140756	0.386292	0.0622463	0.437923	0.0323314	-0.167377	0.434365	0.451099	0.0269335	-0.542492	0.00616598	-0.288951	0.170869	0.429049	0.0364287	-0.0948169	0.659427	0.327308	0.118468	0.425882	0.0379865	-0.708518	0.000106778	-0.249672	0.23936	0.222506	0.296006	-0.0620515	0.773317	-0.237534	0.263719	0.650063	0.00058496	-0.746224	2.82838e-05	-0.240192	0.258254	-0.0150756	0.94426	-0.470245	0.0204023	0.632654	0.000908395
XLOC_000215	Bra011486	AT4G34020	M1	0.301551	0.152139	0.220632	0.300199	0.272317	0.197972	-0.171812	0.422109	0.452617	0.0263612	-0.427897	0.0369893	-0.208455	0.328324	0.232651	0.273953	0.203077	0.341235	-0.0168102	0.937859	0.478089	0.0181281	-0.87541	2.15072e-08	-0.532873	0.00734005	0.509636	0.0109624	0.196471	0.357502	-0.173915	0.416364	0.939791	9.81684e-12	-0.657368	0.000482341	-0.521284	0.0089965	-0.365642	0.0789052	-0.835797	3.69347e-07	0.689074	0.000196178
XLOC_000235	Bra011446	AT4G33490	M1	0.625922	0.00106945	0.629339	0.000984877	0.633803	0.000883098	-0.502581	0.0123168	0.599861	0.00194534	-0.620727	0.00120996	-0.640046	0.000755997	0.50428	0.0119787	-0.0766418	0.72188	0.117872	0.583317	0.840666	2.71674e-07	-0.965121	2.72486e-14	-0.121398	0.572022	-0.0111345	0.958818	0.220846	0.299719	-0.452262	0.0264941	0.88829	6.8913e-09	-0.464315	0.0222707	-0.477606	0.0182619	-0.401913	0.051553	-0.661076	0.000436507	0.406343	0.0487971
XLOC_000243	Bra011434	AT4G33350	M1	0.157914	0.461145	0.146717	0.493907	0.16322	0.446025	-0.0286784	0.894176	0.315475	0.133187	-0.249656	0.23939	-0.0795155	0.711878	0.20813	0.329096	0.178883	0.402964	-0.0369212	0.864005	0.328071	0.117562	-0.581976	0.00285072	-0.399705	0.0529713	0.478558	0.0179988	0.17095	0.424478	0.0498014	0.817241	0.711034	9.83517e-05	-0.496313	0.0136329	-0.383546	0.0642906	-0.0834671	0.698199	-0.588448	0.0024888	0.695499	0.000161284
XLOC_000246	Bra011430	NA	M1	0.0349635	0.871156	0.128101	0.550823	0.084226	0.695582	-0.162105	0.44918	0.152718	0.476207	0.0350128	0.870975	-0.150127	0.483809	-0.0349609	0.871165	0.31348	0.135793	-0.244564	0.249425	0.341366	0.102566	-0.216613	0.30931	-0.0171627	0.936558	-0.176314	0.409863	0.341489	0.102435	-0.155261	0.468803	0.319486	0.128057	0.635896	0.000838586	-0.202377	0.342938	-0.51808	0.00950553	-0.306309	0.145461	-0.316105	0.132372
XLOC_000268	Bra011394	AT4G32900	M1	0.159081	0.457798	0.175691	0.411546	0.165884	0.438535	-0.171856	0.42199	0.328728	0.116785	-0.193537	0.364867	-0.162433	0.448252	-0.00576336	0.978677	0.340074	0.103958	-0.223993	0.292706	0.491556	0.0147068	-0.736844	4.01754e-05	-0.431879	0.0350799	0.396447	0.0551182	0.441259	0.0308896	-0.0482447	0.822864	0.851906	1.28388e-07	-0.461341	0.0232583	-0.612881	0.00145206	-0.249385	0.239918	-0.825562	6.82904e-07	0.628511	0.00100484
XLOC_000286	Bra011352	NA	M1	0.0593579	0.782923	0.160075	0.454956	0.0938077	0.662842	-0.233198	0.272795	0.229709	0.280238	-0.0220532	0.918532	-0.128695	0.548961	0.102011	0.635276	0.341217	0.102726	-0.255287	0.228606	0.461885	0.023075	-0.533889	0.00720795	-0.299804	0.154646	0.244429	0.249694	0.503407	0.0121514	-0.0970415	0.651923	0.696344	0.000157123	-0.421324	0.0403208	-0.345195	0.0985228	0.132307	0.537704	-0.652277	0.000552035	0.721221	6.98813e-05
XLOC_000292	Bra011339	AT4G32340	M1	0.225733	0.288874	0.250403	0.237941	0.226885	0.286355	-0.275575	0.192447	0.343931	0.0998444	-0.286494	0.1747	-0.263206	0.213994	0.257452	0.224547	0.38029	0.0667805	-0.194193	0.363214	0.599308	0.00196911	-0.873113	2.60034e-08	-0.501423	0.0125518	0.311509	0.138403	0.412315	0.0452657	-0.417132	0.0425657	0.96832	9.60097e-15	-0.406038	0.0489835	-0.402148	0.051404	-0.453699	0.0259593	-0.903925	1.41436e-09	0.517716	0.00956482
XLOC_000316	Bra011291	AT4G31700	M1	0.279365	0.186153	0.379619	0.0673021	0.325226	0.120967	-0.322411	0.124408	0.378885	0.067877	-0.299114	0.155643	-0.454294	0.0257403	0.221116	0.299113	0.156142	0.466252	-0.277168	0.189784	0.727425	5.634e-05	-0.851346	1.33463e-07	-0.247872	0.242875	0.233535	0.272081	0.512662	0.0104205	-0.154176	0.471955	0.895949	3.27306e-09	-0.539599	0.00650128	-0.625866	0.00107088	-0.251648	0.235537	-0.784484	5.69415e-06	0.615479	0.00136769
XLOC_000324	Bra011275	AT4G31460	M1	0.5696	0.00366776	0.46563	0.0218447	0.519884	0.00921604	-0.357957	0.0858969	0.581541	0.00287657	-0.70274	0.000128564	-0.452064	0.0265685	0.570055	0.00363457	-0.0485786	0.821657	0.243148	0.252262	0.605492	0.00171684	-0.939101	1.1091e-11	-0.340964	0.102997	0.224699	0.291149	-0.053201	0.804992	-0.429719	0.0361056	0.889397	6.20896e-09	-0.455252	0.025391	-0.315393	0.133293	-0.570548	0.00359887	-0.653808	0.00053022	0.371427	0.0739323
XLOC_000339	Bra011233	AT4G30930	M1	0.626109	0.00106466	0.598458	0.00200613	0.620966	0.00120315	-0.47505	0.0189832	0.575261	0.0032724	-0.689004	0.000196592	-0.57752	0.003125	0.560001	0.00443033	-0.153913	0.472719	0.236005	0.266897	0.731451	4.88407e-05	-0.928838	5.86148e-11	-0.161644	0.450489	0.0705164	0.743347	0.0558524	0.795469	-0.410413	0.0463682	0.853968	1.11147e-07	-0.536022	0.00693675	-0.354311	0.089373	-0.364402	0.080003	-0.58478	0.00268879	0.468073	0.0210712
XLOC_000341	Bra011230	AT4G30890	M1	0.584009	0.0027325	0.570957	0.00356949	0.584054	0.00272994	-0.485717	0.0161188	0.569224	0.00369539	-0.629648	0.000977535	-0.591755	0.00231946	0.461868	0.0230808	-0.0619897	0.773537	0.109741	0.609727	0.765754	1.29518e-05	-0.952583	7.53367e-13	-0.185019	0.386752	0.0512751	0.811926	0.160209	0.454573	-0.455032	0.0254709	0.874874	2.24889e-08	-0.399956	0.0528085	-0.488975	0.0153178	-0.562138	0.00424992	-0.667765	0.000363302	0.302678	0.150538
XLOC_000392	Bra011140	NA	M1	0.491155	0.0148003	0.569295	0.00369018	0.52483	0.00845968	-0.574968	0.00329194	0.554906	0.0048866	-0.479682	0.0176924	-0.596604	0.00208895	0.386987	0.0617369	0.0444828	0.836487	-0.0632529	0.769043	0.845316	2.00673e-07	-0.916936	3.03595e-10	-0.141828	0.508563	0.00344505	0.987253	0.38989	0.0596439	-0.388714	0.0604855	0.906409	1.07295e-09	-0.330267	0.11498	-0.555162	0.00486275	-0.420362	0.0408275	-0.717974	7.80457e-05	0.392991	0.0574694
XLOC_000394	Bra011137	AT4G29810	M1	-0.121707	0.571039	-0.247857	0.242904	-0.20154	0.34498	0.341546	0.102373	-0.242409	0.253751	-0.123091	0.566636	0.205363	0.335711	0.164675	0.441925	0.164832	0.441485	0.0554664	0.796854	-0.25607	0.227132	-0.228956	0.281861	-0.542986	0.0061102	0.390965	0.0588834	-0.251091	0.236612	-0.404418	0.0499803	0.178935	0.402825	-0.564299	0.00407382	0.469629	0.0205902	-0.238761	0.261188	-0.263657	0.21318	0.178999	0.402654
XLOC_000403	Bra011127	AT4G29670	M1	-0.0545702	0.800071	0.113991	0.595861	0.00673037	0.9751	-0.0849265	0.69317	-0.139499	0.51562	0.149018	0.48708	-0.22427	0.292094	-0.031559	0.883614	0.12648	0.555915	-0.364763	0.079682	0.363365	0.0809306	-0.275972	0.191781	0.0100329	0.962889	-0.026996	0.900353	0.555056	0.00487262	-0.120248	0.575696	0.269564	0.202724	-0.645806	0.000653043	-0.124878	0.560971	0.430058	0.0359432	-0.32268	0.124076	0.573369	0.00340029
XLOC_000404	Bra011126	AT4G29660	M1	0.239055	0.260582	0.329001	0.116463	0.254039	0.230968	-0.392118	0.0580754	0.301633	0.152023	-0.203592	0.339985	-0.380684	0.0664753	0.262141	0.21592	0.183456	0.390844	-0.183714	0.390167	0.580763	0.00292324	-0.563657	0.0041255	-0.0967959	0.65275	-0.0546617	0.799742	0.362228	0.0819562	-0.299309	0.15536	0.607155	0.00165389	0.0831978	0.699128	-0.363388	0.0809094	-0.426259	0.0377983	-0.509632	0.0109632	0.06836	0.750949
XLOC_000408	Bra011116	AT4G29480	M1	-0.112367	0.601143	0.0424391	0.843908	-0.0446649	0.835827	-0.207906	0.329628	0.0789461	0.713856	0.274778	0.193788	-0.0725209	0.736301	-0.119475	0.57817	0.247877	0.242865	-0.358764	0.0851424	0.301562	0.152124	-0.0285801	0.894537	0.114117	0.59545	-0.0668522	0.756279	0.536938	0.00682305	0.238278	0.262181	0.217211	0.307945	0.20271	0.342127	-0.286541	0.174627	0.295119	0.16151	-0.20139	0.345346	0.293519	0.163902
XLOC_000415	Bra011106	AT4G29410	M1	0.0707671	0.742465	0.0600721	0.780373	0.0703697	0.743863	-0.112085	0.602062	0.304139	0.14848	-0.162616	0.447732	-0.025789	0.904788	-0.0218283	0.91936	0.369111	0.075894	-0.217029	0.308361	0.363614	0.0807074	-0.697166	0.000153167	-0.556561	0.00473427	0.607762	0.00163143	0.379729	0.0672168	0.0821866	0.702622	0.869461	3.49048e-08	-0.592368	0.00228917	-0.59775	0.00203741	-0.144536	0.500419	-0.843085	2.32349e-07	0.822933	7.94629e-07
XLOC_000430	Bra011069	AT4G28910	M1	0.499091	0.013036	0.368513	0.0764066	0.439954	0.0314475	-0.231095	0.277264	0.472032	0.0198647	-0.654356	0.000522594	-0.332495	0.112404	0.584913	0.00268128	-0.0709681	0.741757	0.285641	0.176043	0.429072	0.0364178	-0.784055	5.80743e-06	-0.359025	0.0848983	0.251174	0.23645	-0.205183	0.336144	-0.438593	0.0320377	0.726653	5.78889e-05	-0.350762	0.0928558	-0.226591	0.286997	-0.611627	0.00149436	-0.518446	0.00944615	0.213219	0.317137
XLOC_000440	Bra011035	AT4G28510	M1	-0.122652	0.56803	-0.278752	0.187161	-0.199174	0.350792	0.055127	0.798072	0.0978513	0.649199	-0.0826015	0.701188	0.336458	0.107928	-0.0296736	0.890525	0.468013	0.0210898	-0.0701765	0.744544	-0.0687898	0.749432	-0.486938	0.0158147	-0.828624	5.70611e-07	0.81427	1.28722e-06	0.0577122	0.788807	-0.0550724	0.798268	0.682789	0.000236499	-0.612211	0.00147454	-0.186114	0.383896	-0.175488	0.412097	-0.740126	3.55929e-05	0.740832	3.46681e-05
XLOC_000442	Bra011030	AT4G28470	M1	0.0906321	0.67363	0.00815968	0.969815	0.0463065	0.829877	-0.158608	0.459152	0.294811	0.161969	-0.309308	0.14136	-0.081103	0.706372	0.323275	0.123344	0.0751244	0.72718	-0.0517358	0.810266	0.140569	0.512373	-0.499147	0.0130242	-0.477264	0.018357	0.435204	0.0335457	-0.0709231	0.741915	-0.29591	0.160336	0.517815	0.00954867	-0.293857	0.163394	-0.212493	0.318827	-0.594383	0.002192	-0.464172	0.0223174	0.137083	0.52299
XLOC_000446	Bra040161	AT4G17520	M1	0.350562	0.0930551	0.364104	0.0802684	0.359022	0.0849012	-0.301772	0.151824	0.447762	0.0282268	-0.429563	0.0361805	-0.388786	0.0604334	0.31934	0.128241	0.199251	0.3506	-0.113352	0.597939	0.671536	0.00032693	-0.931937	3.64479e-11	-0.396775	0.054899	0.305329	0.146818	0.332388	0.112527	-0.28351	0.179432	0.985447	1.99754e-18	-0.457173	0.0247018	-0.515327	0.00996173	-0.466842	0.0214583	-0.843982	2.19103e-07	0.54254	0.00616057
XLOC_000459	Bra013257	AT4G17810	M1	0.186499	0.382895	0.320917	0.126262	0.253647	0.231712	-0.148187	0.489539	0.206419	0.333176	-0.148065	0.489901	-0.424012	0.038931	0.112446	0.600886	0.233703	0.271728	-0.368714	0.0762337	0.691601	0.000181737	-0.740835	3.46644e-05	-0.173956	0.416252	0.106277	0.621123	0.603352	0.0018008	-0.210163	0.324287	0.763481	1.42377e-05	-0.475981	0.0187179	-0.500735	0.0126929	-0.184124	0.389092	-0.724553	6.22927e-05	0.506634	0.0115229
XLOC_000493	Bra013326	AT4G18590	M1	0.201078	0.346111	0.15154	0.479653	0.176789	0.408583	0.0299271	0.889595	0.232479	0.274318	-0.209435	0.326004	-0.105864	0.622487	0.121657	0.571198	0.141046	0.510928	0.0299439	0.889534	0.321633	0.125372	-0.545139	0.00587195	-0.290196	0.168949	0.322285	0.124563	0.213161	0.317271	0.00436068	0.983866	0.592978	0.0022594	-0.757173	1.84164e-05	-0.255751	0.227733	0.247336	0.243927	-0.527564	0.00806423	0.818683	1.00996e-06
XLOC_000494	Bra013327	AT4G18593	M1	0.218821	0.304285	0.301752	0.151854	0.272205	0.198164	-0.254673	0.229766	0.312526	0.137052	-0.0963902	0.654116	-0.313291	0.136041	0.0628949	0.770316	-0.025405	0.9062	-0.0906864	0.673445	0.50044	0.0127541	-0.425238	0.0383098	0.050365	0.815207	0.00236555	0.991247	0.435449	0.0334349	0.0102621	0.962042	0.426493	0.0376821	-0.672307	0.000319896	-0.391575	0.0584549	0.451976	0.0266016	-0.354857	0.088846	0.724941	6.14566e-05
XLOC_000503	Bra013342	NA	M1	0.0236059	0.912817	0.00914713	0.966164	0.0187115	0.930846	-0.147267	0.492271	0.275248	0.192996	-0.139879	0.514465	-0.0588338	0.784795	-0.0217189	0.919763	0.457399	0.0246216	-0.340771	0.103205	0.393256	0.0572861	-0.74332	3.15802e-05	-0.614724	0.00139177	0.578599	0.00305661	0.435236	0.0335312	-0.0552998	0.797452	0.912867	5.03917e-10	-0.39228	0.0579624	-0.600592	0.0019143	-0.449705	0.027468	-0.922771	1.40088e-10	0.588793	0.00247064
XLOC_000509	Bra013360	NA	M1	0.527233	0.00811134	0.531795	0.00748253	0.527475	0.00807678	-0.439318	0.0317221	0.517053	0.00967364	-0.587521	0.0025381	-0.560512	0.00438662	0.485164	0.0162579	0.0172621	0.936191	0.0537496	0.80302	0.76031	1.62194e-05	-0.973983	1.12945e-15	-0.252625	0.233663	0.0816237	0.704569	0.214565	0.314019	-0.488762	0.0153693	0.923711	1.2297e-10	-0.453959	0.0258633	-0.382563	0.0650341	-0.510608	0.010786	-0.726162	5.8894e-05	0.389473	0.0599414
XLOC_000515	Bra013370	AT4G19020	M1	-0.155002	0.469556	-0.0979081	0.649008	-0.131607	0.539879	-0.220566	0.300346	0.109335	0.611057	0.205137	0.336255	0.107565	0.616875	-0.343817	0.0999637	0.549512	0.00541195	-0.361065	0.0830159	0.231259	0.276915	-0.359784	0.0841947	-0.405579	0.0492644	0.264769	0.211185	0.59986	0.00194538	-0.0236051	0.91282	0.554016	0.00497017	-0.204596	0.337559	-0.322105	0.124786	-0.00428374	0.984151	-0.671777	0.000324717	0.517309	0.00963149
XLOC_000520	Bra013382	AT4G19200	M1	0.208908	0.327251	0.248215	0.242202	0.243435	0.251685	-0.355471	0.0882556	0.493564	0.0142453	-0.0797708	0.710991	-0.231539	0.276317	0.0270786	0.90005	0.274056	0.195009	-0.15199	0.478337	0.547203	0.00565098	-0.477718	0.0182308	-0.102826	0.632565	-0.0243942	0.909917	0.485042	0.0162887	-0.10993	0.609105	0.595151	0.00215587	0.0542212	0.801325	-0.492538	0.0144794	-0.129753	0.545653	-0.535998	0.00693979	0.28904	0.170731
XLOC_000522	Bra013385	AT4G19210	M1	-0.0240736	0.911096	-0.0116486	0.956918	-0.0425705	0.84343	-0.0909642	0.672499	0.158359	0.459868	-0.13567	0.527323	-0.0157453	0.941789	0.0878949	0.682979	0.481316	0.0172545	-0.329521	0.115852	0.314581	0.13435	-0.72809	5.5036e-05	-0.69847	0.000147071	0.576266	0.00320609	0.367116	0.0776145	-0.270271	0.201497	0.870206	3.2894e-08	-0.497093	0.013463	-0.381674	0.0657133	-0.465179	0.02199	-0.907569	9.40562e-10	0.551972	0.00516679
XLOC_000545	Bra013425	AT4G19710	M1	0.354654	0.0890413	0.263946	0.212661	0.332947	0.111887	-0.307163	0.144283	0.523285	0.00869015	-0.432724	0.0346848	-0.262752	0.214815	0.255109	0.228942	-0.108719	0.613079	0.138602	0.518349	0.41982	0.0411151	-0.652907	0.000542957	-0.240756	0.257104	0.377879	0.0686712	0.0775179	0.718826	0.0522423	0.808442	0.670792	0.000333845	-0.766985	1.22992e-05	-0.476188	0.0186593	0.0751574	0.727064	-0.495819	0.0137412	0.794386	3.56761e-06
XLOC_000559	Bra013452	AT4G20280	M1	0.644732	0.000671262	0.557046	0.00469035	0.653127	0.000539821	-0.314809	0.134053	0.484771	0.0163575	-0.60261	0.00183073	-0.567775	0.00380356	0.457206	0.02469	-0.320271	0.12707	0.401847	0.0515948	0.581529	0.00287723	-0.607648	0.00163564	0.152218	0.477669	-0.273948	0.195193	-0.0958002	0.656106	-0.383315	0.0644644	0.43856	0.0320523	-0.280246	0.184709	-0.0584428	0.786193	-0.194232	0.363114	-0.193315	0.365428	0.14522	0.498371
XLOC_000573	Bra013481	AT4G20890	M1	0.231129	0.277192	0.187619	0.379993	0.224831	0.290858	-0.282319	0.181346	0.412001	0.0454462	-0.280258	0.18469	-0.161317	0.451419	0.0355113	0.869154	0.362706	0.0815236	-0.115051	0.592424	0.509268	0.01103	-0.822318	8.2301e-07	-0.51055	0.0107964	0.401349	0.0519127	0.379539	0.0673648	-0.187693	0.379804	0.936505	1.7342e-11	-0.43483	0.0337157	-0.553264	0.00504179	-0.369858	0.0752569	-0.89104	5.3083e-09	0.613697	0.00142509
XLOC_000634	Bra013582	AT4G22010	M1	0.154836	0.470038	-0.0424068	0.844025	0.0776126	0.718496	-0.0972417	0.651249	0.441146	0.0309376	-0.368453	0.0764583	0.13748	0.521777	0.0887341	0.680108	0.0270043	0.900323	0.20664	0.332649	-0.0600992	0.780276	-0.399158	0.0533272	-0.529236	0.00782997	0.62309	0.0011442	-0.261751	0.21663	0.0897057	0.676789	0.461879	0.0230771	-0.351106	0.0925138	-0.431677	0.0351748	-0.398359	0.0538503	-0.403282	0.0506892	0.336418	0.107972
XLOC_000657	Bra013635	AT4G22720	M1	0.586764	0.00257896	0.565995	0.00394001	0.59686	0.00207736	-0.429903	0.0360175	0.604024	0.00177406	-0.646951	0.000634098	-0.585823	0.00263055	0.428973	0.0364654	-0.143832	0.50253	0.137051	0.523088	0.726687	5.78211e-05	-0.910936	6.35479e-10	-0.143402	0.503822	0.0918105	0.66962	0.121592	0.571406	-0.279363	0.186156	0.830347	5.14944e-07	-0.448198	0.028055	-0.543265	0.00607884	-0.474315	0.0191949	-0.602179	0.00184832	0.366811	0.0778801
XLOC_000687	Bra013697	AT4G23500	M1	0.395071	0.0560455	0.217356	0.307614	0.350694	0.0929237	0.269677	0.202528	0.335435	0.10907	-0.514266	0.0101424	-0.253239	0.232491	0.374317	0.0715392	-0.477527	0.0182838	0.366441	0.0782036	0.0992328	0.644563	-0.263606	0.213273	0.0817641	0.704083	0.193782	0.364249	-0.416445	0.0429429	0.271232	0.199835	0.120729	0.574159	-0.454099	0.0258119	-0.155563	0.467929	-0.0174597	0.935462	0.0988377	0.645887	0.222662	0.295661
XLOC_000695	Bra013714	NA	M1	0.470777	0.020241	0.43452	0.033857	0.458864	0.0241077	-0.244996	0.248563	0.425895	0.0379803	-0.573563	0.00338702	-0.485934	0.0160644	0.725237	6.08271e-05	-0.111104	0.605266	0.160578	0.453522	0.573191	0.00341253	-0.753872	2.1008e-05	-0.187159	0.381184	0.0538082	0.802809	-0.0581997	0.787063	-0.553748	0.00499563	0.681995	0.00024208	-0.322662	0.124099	-0.0873437	0.684868	-0.487398	0.0157012	-0.442336	0.0304354	0.18935	0.375533
XLOC_000730	Bra013772	AT4G24175	M1	0.262868	0.214604	0.0358495	0.867918	0.17232	0.420719	-0.0342838	0.87364	0.484376	0.0164581	-0.409622	0.0468325	0.00840282	0.968916	0.24466	0.249233	0.178982	0.402699	0.182552	0.393225	0.217188	0.307996	-0.651394	0.000564961	-0.554736	0.00490251	0.593343	0.00224171	-0.0681477	0.751699	-0.0110597	0.959094	0.76057	1.60481e-05	-0.473776	0.0193514	-0.338351	0.105835	-0.286281	0.175035	-0.63599	0.000836639	0.610651	0.00152801
XLOC_000731	Bra013776	AT4G24210	M1	-0.14076	0.511794	-0.149064	0.486945	-0.149044	0.487004	-0.042672	0.843061	0.0774812	0.718954	0.0122872	0.954558	0.0460701	0.830733	-0.0393602	0.855111	0.445826	0.0289994	-0.405484	0.0493225	0.178808	0.403166	-0.513561	0.0102639	-0.595213	0.00215301	0.521334	0.00898879	0.363386	0.0809119	-0.187478	0.380359	0.642644	0.000707952	-0.326935	0.118913	-0.36334	0.0809525	-0.455331	0.0253622	-0.737068	3.98473e-05	0.353686	0.0899789
XLOC_000732	Bra013777	AT4G24220	M1	0.344092	0.0996754	0.422635	0.039638	0.389865	0.059662	-0.291109	0.167552	0.348362	0.0952678	-0.329404	0.11599	-0.432508	0.0347857	0.265483	0.20991	0.256511	0.226305	-0.138887	0.517484	0.740594	3.49779e-05	-0.862367	6.03571e-08	-0.258801	0.222042	0.0614034	0.775626	0.445393	0.0291746	-0.42531	0.0382735	0.896325	3.1512e-09	-0.29772	0.157674	-0.398316	0.0538782	-0.411417	0.0457839	-0.783265	6.02149e-06	0.403969	0.0502594
XLOC_000736	Bra013786,Bra013788	NA	M1	-0.269814	0.202289	-0.364924	0.0795392	-0.335741	0.108727	0.0436177	0.839627	0.0921849	0.668347	0.0661191	0.758874	0.415103	0.0436875	-0.14673	0.493868	0.633378	0.000892382	-0.268884	0.20391	-0.095164	0.658254	-0.429578	0.0361736	-0.889827	5.9609e-09	0.847033	1.78987e-07	0.220452	0.300602	-0.00531512	0.980335	0.69498	0.000163886	-0.419849	0.0411	-0.286593	0.174545	-0.267854	0.205715	-0.814104	1.29887e-06	0.651709	0.000560323
XLOC_000748	Bra013803	AT4G24450	M1	-0.0638326	0.766984	-0.0349016	0.871382	-0.075638	0.725385	-0.173865	0.416501	0.116673	0.58718	0.00348861	0.987092	-0.0418668	0.845988	0.26025	0.219372	0.308832	0.142005	-0.243851	0.25085	0.182636	0.393004	-0.281427	0.182789	-0.322887	0.123822	0.119798	0.577138	0.191369	0.370369	-0.40956	0.0468692	0.378227	0.0683957	0.166838	0.435869	-0.0303282	0.888125	-0.461789	0.0231073	-0.392406	0.0578752	-0.0811279	0.706286
XLOC_000749	Bra013804	AT4G24460	M1	0.323626	0.122915	0.19202	0.368712	0.268368	0.204813	-0.225351	0.289713	0.458348	0.0242878	-0.388776	0.0604408	-0.1992	0.350728	0.256315	0.226673	0.251934	0.234987	0.0200524	0.925903	0.487716	0.0156233	-0.833253	4.31956e-07	-0.500359	0.0127707	0.403115	0.0507935	0.207172	0.331378	-0.307073	0.144407	0.887579	7.36374e-09	-0.566673	0.00388753	-0.423144	0.0393754	-0.33131	0.113769	-0.803984	2.21254e-06	0.599485	0.00196146
XLOC_000762	Bra013836,Bra013837	NA	M1	0.141943	0.508217	0.225477	0.289436	0.187409	0.380536	-0.100713	0.639608	0.237371	0.264056	-0.179724	0.400719	-0.272411	0.197811	0.0552702	0.797558	0.348036	0.0955999	-0.336145	0.108276	0.583247	0.0027763	-0.771572	1.01162e-05	-0.36967	0.0754169	0.306603	0.145055	0.517247	0.00964176	-0.129276	0.547142	0.868347	3.81202e-08	-0.362841	0.0814017	-0.548965	0.00546785	-0.382123	0.06537	-0.827788	5.99481e-07	0.510971	0.0107205
XLOC_000765	Bra013848,Bra013849	NA	M1	0.432605	0.03474	0.456403	0.024976	0.450545	0.027145	-0.297957	0.157327	0.447178	0.0284582	-0.476047	0.0186992	-0.501881	0.0124584	0.357167	0.0866412	-0.0026292	0.990272	-0.0443317	0.837035	0.710642	9.96228e-05	-0.904247	1.36518e-09	-0.228491	0.282866	0.21253	0.31874	0.307509	0.14381	-0.228429	0.282999	0.87638	1.98278e-08	-0.714393	8.80097e-05	-0.505165	0.0118056	-0.205798	0.334666	-0.706564	0.000113755	0.667163	0.000369417
XLOC_000768	Bra013852	AT4G24972	M1	0.576546	0.00318785	0.594979	0.00216392	0.590185	0.0023986	-0.59137	0.00233867	0.654607	0.000519127	-0.54115	0.00631964	-0.552874	0.00507923	0.426545	0.0376563	-0.0156688	0.942071	0.117415	0.584789	0.813014	1.37764e-06	-0.903892	1.41951e-09	-0.139268	0.516322	0.0145067	0.946361	0.287754	0.172727	-0.388401	0.0607104	0.885156	9.20299e-09	-0.458512	0.0242302	-0.533416	0.00726916	-0.248975	0.240716	-0.669436	0.000346768	0.522463	0.00881501
XLOC_000769	Bra013856	NA	M1	0.736544	4.06198e-05	0.668801	0.000352974	0.717448	7.94456e-05	-0.564656	0.00404535	0.680421	0.000253468	-0.746407	2.80867e-05	-0.594777	0.00217341	0.644191	0.000680619	-0.259517	0.220721	0.412619	0.0450913	0.728046	5.51209e-05	-0.880745	1.36366e-08	-0.0787895	0.7144	-0.0341123	0.874268	-0.0582489	0.786886	-0.497401	0.0133965	0.766765	1.24139e-05	-0.547453	0.0056247	-0.318252	0.12962	-0.256813	0.22574	-0.472308	0.0197828	0.440219	0.0313337
XLOC_000795	Bra013899	AT4G25550	M1	0.186585	0.382672	0.194997	0.36119	0.197741	0.35434	-0.211267	0.321694	0.301339	0.152442	-0.149813	0.484735	-0.119181	0.579113	0.0403321	0.851571	0.0869635	0.686171	-0.00429472	0.98411	0.347521	0.0961241	-0.46028	0.023619	-0.193549	0.364839	0.269625	0.202618	0.268753	0.20414	0.0628564	0.770453	0.528064	0.00799352	-0.654709	0.000517732	-0.402547	0.0511517	0.315755	0.132824	-0.46118	0.0233128	0.791142	4.16937e-06
XLOC_000799	Bra013905	AT4G25630	M1	0.374796	0.0711486	0.414531	0.0440075	0.391316	0.0586361	-0.43282	0.0346401	0.468838	0.0208336	-0.421308	0.0403293	-0.444725	0.0294466	0.341811	0.10209	0.202998	0.341428	-0.115089	0.592302	0.728176	5.48692e-05	-0.928005	6.63569e-11	-0.342691	0.101153	0.165276	0.44024	0.373065	0.072569	-0.424646	0.0386088	0.963799	4.07758e-14	-0.3513	0.0923217	-0.467378	0.0212891	-0.509928	0.0109093	-0.828291	5.81965e-07	0.427183	0.0373403
XLOC_000817	Bra013937,Bra013938	NA	M1	0.161186	0.451789	0.284778	0.17741	0.216297	0.310036	-0.344817	0.0989158	0.317255	0.130893	-0.119418	0.578354	-0.270089	0.201812	0.0668716	0.75621	0.381228	0.0660553	-0.293177	0.164416	0.653041	0.000541045	-0.747376	2.70631e-05	-0.323273	0.123347	0.198445	0.352594	0.624714	0.00110081	-0.208791	0.327528	0.883151	1.10255e-08	-0.404342	0.0500275	-0.507771	0.011308	-0.112438	0.600913	-0.832682	4.4725e-07	0.672028	0.000322419
XLOC_000827	Bra013951	NA	M1	0.443327	0.030022	0.522135	0.0088652	0.487597	0.0156524	-0.407431	0.0481383	0.514471	0.0101072	-0.425025	0.0384171	-0.568946	0.00371596	0.346457	0.0972164	0.0921373	0.668509	-0.126912	0.554556	0.83935	2.95483e-07	-0.903759	1.44028e-09	-0.147521	0.491515	0.0458469	0.831542	0.444405	0.0295776	-0.29971	0.154781	0.910689	6.54341e-10	-0.349611	0.094007	-0.570979	0.00356792	-0.37806	0.0685281	-0.735489	4.22155e-05	0.440066	0.0313991
XLOC_000841	Bra026505	AT5G23290	M1	0.310034	0.140379	0.444792	0.0294192	0.369029	0.0759642	-0.459269	0.0239672	0.411026	0.0460109	-0.365361	0.0791533	-0.488353	0.0154681	0.34497	0.0987566	-0.0970543	0.65188	-0.137915	0.520446	0.629596	0.000978751	-0.681077	0.000248662	-0.0955706	0.656881	0.0997937	0.642684	0.310333	0.139976	-0.183304	0.391243	0.665513	0.000386652	-0.498168	0.0132318	-0.503504	0.0121321	-0.161113	0.451999	-0.504633	0.0119095	0.485664	0.0161319
XLOC_000851	Bra026490	AT5G23575	M1	0.0246691	0.908906	0.256941	0.225501	0.110249	0.608063	-0.355282	0.0884375	0.0342952	0.873599	0.0103889	0.961573	-0.359556	0.0844052	-0.0473481	0.826107	0.300459	0.153702	-0.518235	0.00948044	0.583821	0.00274323	-0.565029	0.00401579	-0.155555	0.467952	-0.00477043	0.98235	0.670605	0.000335595	-0.304887	0.147434	0.589852	0.00241569	-0.171111	0.424033	-0.496153	0.0136679	-0.374727	0.0712047	-0.64566	0.000655499	0.164414	0.442661
XLOC_000856	Bra026478	AT5G23890	M1	0.224438	0.291724	0.090621	0.673668	0.156006	0.466646	-0.218583	0.304824	0.427961	0.0369582	-0.352979	0.0906687	0.0413787	0.847763	0.132597	0.536806	0.251295	0.236217	0.175311	0.412574	0.187605	0.380029	-0.546857	0.00568747	-0.497853	0.0132993	0.423277	0.0393072	-0.054209	0.801368	-0.1066	0.620059	0.672445	0.000318645	-0.0609744	0.777155	-0.352737	0.0909055	-0.505343	0.011771	-0.579534	0.00299837	0.270321	0.201409
XLOC_000880	Bra026426,Bra026427	NA	M1	0.00310924	0.988496	0.090794	0.673079	0.0261393	0.903501	-0.213486	0.316517	0.190602	0.372326	-0.0244311	0.909781	-0.139634	0.515211	0.0303541	0.88803	0.559713	0.00445513	-0.435408	0.0334534	0.527654	0.00805147	-0.735284	4.25306e-05	-0.518721	0.0094018	0.340395	0.103611	0.634358	0.000871095	-0.293181	0.16441	0.90184	1.77326e-09	-0.327846	0.117828	-0.439609	0.0315965	-0.338112	0.106098	-0.9358	1.95183e-11	0.543342	0.00607022
XLOC_000883	Bra026418	AT4G26600	M1	0.48141	0.0172295	0.4807	0.0174185	0.487777	0.0156085	-0.373949	0.0718406	0.471935	0.0198937	-0.511831	0.010567	-0.525258	0.0083967	0.385191	0.0630601	0.0945686	0.660267	-0.0135685	0.949825	0.766314	1.26512e-05	-0.963548	4.39491e-14	-0.260994	0.218011	0.0979362	0.648914	0.303297	0.149664	-0.440926	0.0310313	0.932985	3.08805e-11	-0.461645	0.0231558	-0.419893	0.0410767	-0.458819	0.0241234	-0.770499	1.05935e-05	0.43658	0.032927
XLOC_000887	Bra026412	AT4G26670	M1	0.122901	0.567237	0.203663	0.339814	0.14806	0.489916	-0.219679	0.302345	0.260726	0.218501	-0.183487	0.390764	-0.25328	0.232412	0.155411	0.468369	0.439229	0.0317606	-0.353786	0.0898819	0.595456	0.00214171	-0.834284	4.05532e-07	-0.488236	0.0154966	0.324451	0.121907	0.528583	0.00792075	-0.321301	0.125784	0.953327	6.35273e-13	-0.343171	0.100645	-0.454348	0.0257206	-0.470525	0.0203174	-0.924825	1.05154e-10	0.490836	0.0148752
XLOC_000915	Bra026354,tRNA-Phe	NA	M1	0.0519878	0.809358	0.196272	0.357997	0.122327	0.569064	-0.237688	0.263401	0.218451	0.305123	0.089431	0.677727	-0.250967	0.236849	-0.164302	0.442975	0.28642	0.174816	-0.417024	0.042625	0.552789	0.00508748	-0.467252	0.0213287	-0.0782368	0.716323	0.0444721	0.836526	0.733631	4.51584e-05	0.0230464	0.914876	0.553601	0.00500958	-0.373657	0.0720802	-0.601232	0.00188744	0.164794	0.441591	-0.590486	0.00238324	0.568182	0.00377287
XLOC_000922	Bra026344	AT4G27490	M1	0.336547	0.107828	0.276574	0.190774	0.312486	0.137104	-0.261744	0.216643	0.391225	0.0587002	-0.450917	0.0270027	-0.279453	0.186008	0.305547	0.146516	0.23394	0.271226	0.00722677	0.973265	0.542363	0.00618062	-0.919899	2.06478e-10	-0.511986	0.0105397	0.33931	0.104788	0.202739	0.342057	-0.440788	0.0310903	0.950563	1.18107e-12	-0.557898	0.00461414	-0.309056	0.1417	-0.475283	0.0189167	-0.844686	2.09196e-07	0.545815	0.0057988
XLOC_000936	Bra026318	NA	M1	-0.319098	0.128547	-0.343871	0.0999068	-0.369332	0.0757053	0.130803	0.542378	-0.270432	0.201217	0.255064	0.229027	0.344556	0.0991885	-0.176383	0.409677	0.428423	0.0367328	-0.251354	0.236103	-0.186464	0.382988	-0.0457114	0.832033	-0.452316	0.0264739	0.406805	0.0485168	0.194582	0.362234	-0.0454717	0.832902	0.185801	0.384711	-0.30279	0.150379	0.0691321	0.748225	0.100224	0.641245	-0.336823	0.107521	0.358699	0.0852029
XLOC_000987	Bra026227	NA	M1	-0.083182	0.699183	-0.200563	0.347373	-0.15381	0.473021	-0.0740587	0.730909	0.203351	0.34057	-0.1054	0.624024	0.160976	0.452389	0.0736714	0.732266	0.475041	0.018986	-0.210389	0.323753	0.0769275	0.720884	-0.49164	0.0146871	-0.69773	0.000150507	0.57062	0.00359366	0.114168	0.595288	-0.244182	0.250187	0.660526	0.000443061	-0.0651175	0.762423	-0.253924	0.231186	-0.652966	0.000542117	-0.709205	0.000104416	0.187137	0.381242
XLOC_001000	Bra038503	AT4G16720	M1	0.150231	0.483502	0.129037	0.547891	0.13947	0.51571	-0.231	0.277467	0.383042	0.0646712	-0.264893	0.210963	-0.139412	0.515887	0.160694	0.453191	0.347561	0.0960839	-0.199297	0.350488	0.466185	0.021667	-0.816059	1.16757e-06	-0.581159	0.00289942	0.542824	0.00612849	0.352191	0.0914411	-0.148792	0.487749	0.95643	3.02475e-13	-0.539991	0.006455	-0.533435	0.00726675	-0.343826	0.0999539	-0.895317	3.48788e-09	0.701892	0.000132071
XLOC_001033	Bra038447,Bra038448	NA	M1	0.0612429	0.776197	-0.0850917	0.692602	-0.0227932	0.915808	0.0717599	0.738973	0.131014	0.541722	-0.233381	0.272406	0.068364	0.750935	0.19075	0.371948	0.185486	0.385532	0.0786418	0.714914	0.00951882	0.96479	-0.400856	0.0522282	-0.478189	0.0181003	0.415316	0.0435687	-0.113322	0.598033	-0.12292	0.567177	0.446456	0.0287464	-0.316543	0.131806	0.00650209	0.975945	-0.301168	0.152687	-0.418901	0.0416071	0.284487	0.177874
XLOC_001041	Bra033543	NA	M1	0.480668	0.0174271	0.465636	0.021843	0.48219	0.0170239	-0.305372	0.146759	0.4528	0.0262927	-0.50141	0.0125545	-0.474909	0.0190238	0.365999	0.0785911	-0.0249627	0.907826	0.101707	0.63629	0.598019	0.00202548	-0.683504	0.00023158	-0.071801	0.738829	-0.0789541	0.713828	0.0713837	0.740296	-0.326887	0.11897	0.631795	0.000927704	0.0454811	0.832867	-0.284148	0.178413	-0.612376	0.00146898	-0.449017	0.0277347	-0.0264356	0.902412
XLOC_001050	Bra033533,Bra033534	NA	M1	0.185704	0.384965	0.255352	0.228484	0.211747	0.320568	-0.276322	0.191195	0.231653	0.276074	-0.245135	0.248285	-0.297251	0.158359	0.168625	0.430898	0.314552	0.134388	-0.266999	0.207221	0.596451	0.00209593	-0.819947	9.41053e-07	-0.409668	0.0468058	0.291931	0.166302	0.451858	0.0266461	-0.266604	0.20792	0.903516	1.47913e-09	-0.439718	0.0315493	-0.424305	0.0387817	-0.350252	0.0933649	-0.839672	2.89487e-07	0.557341	0.00466387
XLOC_001090	Bra039566	NA	M1	0.380297	0.0667752	0.428276	0.0368041	0.401008	0.052131	-0.220262	0.30103	0.307366	0.144006	-0.435859	0.0332499	-0.483567	0.0166657	0.32536	0.120805	0.110235	0.608107	-0.128383	0.549939	0.6796	0.000259593	-0.899142	2.35887e-09	-0.282194	0.181547	0.157616	0.462003	0.304804	0.147551	-0.384617	0.0634871	0.855252	1.01498e-07	-0.470599	0.0202948	-0.443083	0.0301232	-0.518722	0.00940164	-0.744688	2.99871e-05	0.358939	0.0849787
XLOC_001097	Bra036920	AT4G15010	M1	-0.232815	0.273603	-0.402161	0.051396	-0.333001	0.111825	0.147887	0.49043	-0.0358664	0.867856	0.0143991	0.946758	0.43659	0.0329226	-0.0669102	0.756073	0.612457	0.00146626	-0.129003	0.547996	-0.192847	0.366614	-0.397455	0.0544468	-0.909725	7.32969e-10	0.737205	3.9648e-05	0.0386017	0.857875	-0.282318	0.181348	0.583482	0.00276274	-0.375966	0.0702006	0.0214328	0.920817	-0.423262	0.0393149	-0.726352	5.85024e-05	0.418333	0.0419131
XLOC_001123	Bra036865	AT4G14510	M1	0.22199	0.297157	0.0529063	0.806052	0.149146	0.486703	0.079463	0.71206	0.317173	0.130998	-0.438877	0.0319138	-0.0870416	0.685903	0.204249	0.338397	0.0758212	0.724745	0.0415669	0.847079	0.176608	0.409071	-0.638937	0.000777356	-0.50381	0.0120715	0.576034	0.0032213	-0.120148	0.576018	-0.0158306	0.941473	0.648796	0.000604547	-0.398439	0.0537975	-0.426898	0.0374812	-0.620822	0.00120725	-0.571621	0.00352221	0.275799	0.19207
XLOC_001166	Bra037621	NA	M1	0.402398	0.0512454	0.314907	0.133925	0.371314	0.074027	-0.118712	0.580619	0.245686	0.24719	-0.493829	0.0141852	-0.430649	0.0356611	0.473193	0.0195219	-0.177022	0.407956	0.139237	0.516416	0.382016	0.0654516	-0.519683	0.00924803	-0.0550925	0.798196	-0.0878539	0.68312	-0.174321	0.41526	-0.539499	0.00651318	0.34825	0.0953821	-0.049783	0.817307	-0.0548712	0.79899	-0.720177	7.24204e-05	-0.218457	0.305109	-0.300017	0.154338
XLOC_001197	Bra033807,Bra033808	NA	M1	0.0204726	0.924354	-0.137173	0.522714	-0.0467933	0.828115	-0.105346	0.624202	0.242416	0.253738	-0.0868551	0.686543	0.215543	0.311765	-0.178156	0.404911	0.564143	0.00408635	-0.0629585	0.77009	0.140818	0.511619	-0.576255	0.00320684	-0.709628	0.000102986	0.541144	0.00632041	0.247509	0.243589	-0.197119	0.355887	0.743104	3.18389e-05	-0.356936	0.0868601	-0.342606	0.101243	-0.315215	0.133524	-0.834505	4.00067e-07	0.537459	0.00675899
XLOC_001213	Bra033788	AT3G47640	M1	0.151132	0.480851	0.112794	0.599754	0.150002	0.484178	-0.132273	0.53781	0.330886	0.114261	-0.187909	0.379245	-0.112429	0.600942	0.193979	0.363752	0.312143	0.13756	-0.098519	0.646957	0.360331	0.0836893	-0.538657	0.00661367	-0.364555	0.0798668	0.215165	0.312634	0.206916	0.331989	-0.265502	0.209876	0.654138	0.000525606	0.0372776	0.862704	-0.222228	0.296627	-0.478106	0.0181233	-0.586282	0.00260532	0.179142	0.402274
XLOC_001235	Bra029899	AT3G48500	M1	-0.136337	0.525277	-0.206367	0.333302	-0.182291	0.393912	0.100677	0.639729	0.0318051	0.882713	-0.0702813	0.744174	0.194378	0.362748	-0.0596315	0.781946	0.564674	0.00404393	-0.288093	0.172199	0.103482	0.630384	-0.645435	0.000659294	-0.835932	3.66273e-07	0.759576	1.6712e-05	0.264307	0.212013	-0.142138	0.507629	0.822174	8.2978e-07	-0.575515	0.00325549	-0.281068	0.183372	-0.398926	0.0534782	-0.909501	7.52453e-10	0.65072	0.000575009
XLOC_001255	Bra029933	NA	M1	0.610605	0.0015296	0.682486	0.000238617	0.661371	0.000433028	-0.286944	0.173994	0.432325	0.0348708	-0.625944	0.00106889	-0.747979	2.64422e-05	0.681549	0.000245259	-0.321809	0.125153	0.144803	0.49962	0.77775	7.72016e-06	-0.767454	1.20583e-05	0.141551	0.509402	-0.19778	0.354243	0.057362	0.79006	-0.393017	0.0574511	0.617882	0.00129341	-0.353844	0.0898258	-0.172868	0.419218	-0.319418	0.128144	-0.31599	0.13252	0.201095	0.346069
XLOC_001262	Bra029944	AT3G49240	M1	0.498653	0.0131287	0.462703	0.0228015	0.485036	0.0162903	-0.352164	0.0914678	0.515304	0.00996575	-0.60229	0.00184376	-0.465945	0.0217438	0.478869	0.0179138	0.0407653	0.849995	0.0919879	0.669017	0.676624	0.000282882	-0.970225	4.89632e-15	-0.347441	0.0962059	0.233927	0.271255	0.13224	0.537914	-0.394036	0.0567508	0.954472	4.86086e-13	-0.502291	0.0123752	-0.393986	0.0567848	-0.506298	0.0115871	-0.749413	2.50171e-05	0.479566	0.0177238
XLOC_001266	Bra029954,Bra029955	NA	M1	0.418138	0.0420181	0.475609	0.0188235	0.439685	0.0315636	-0.439242	0.0317553	0.498467	0.0131681	-0.452614	0.0263625	-0.555283	0.00485154	0.387682	0.0612308	0.0529019	0.806068	-0.143878	0.502393	0.767622	1.19734e-05	-0.889532	6.13024e-09	-0.199965	0.348843	0.113757	0.59662	0.353587	0.0900751	-0.328884	0.116601	0.874979	2.22941e-08	-0.334264	0.11039	-0.594797	0.00217248	-0.520833	0.00906673	-0.717505	7.92918e-05	0.32583	0.120239
XLOC_001274	Bra029966	AT3G49680	M1	-0.001566	0.994206	-0.175832	0.411166	-0.0915714	0.670433	0.178394	0.404273	0.20761	0.330333	-0.232668	0.273916	0.1644	0.4427	0.191659	0.369629	0.341923	0.10197	-0.0862633	0.688574	0.0223694	0.917368	-0.54226	0.00619229	-0.732815	4.65071e-05	0.749854	2.45927e-05	-0.0561696	0.794332	-0.0724008	0.736722	0.67008	0.000340575	-0.38427	0.0637464	-0.27107	0.200115	-0.512559	0.0104386	-0.671402	0.000328161	0.403815	0.0503557
XLOC_001345	Bra035416	AT1G59900	M1	0.420295	0.0408632	0.361355	0.0827505	0.405271	0.0494534	-0.193666	0.364542	0.360445	0.0835848	-0.509135	0.0110544	-0.333175	0.111626	0.440335	0.031284	-0.193833	0.364121	0.261421	0.21723	0.32002	0.127385	-0.394029	0.0567554	0.00878565	0.9675	-0.0457789	0.831788	-0.27172	0.198996	-0.197137	0.35584	0.338412	0.105768	0.33428	0.110371	-0.19625	0.358052	-0.713951	8.9313e-05	-0.112973	0.59917	-0.326514	0.119416
XLOC_001364	Bra031506	AT1G60460	M1	-0.17145	0.423103	-0.325137	0.121075	-0.241613	0.255361	-0.107789	0.616138	0.179233	0.402028	0.104821	0.625941	0.378101	0.0684953	-0.293883	0.163356	0.505148	0.0118089	-0.129964	0.544994	-0.0771711	0.720035	-0.316631	0.131694	-0.678444	0.000268434	0.631668	0.000930598	0.251923	0.235009	0.00709522	0.973751	0.519901	0.00921333	-0.52031	0.00914885	-0.263145	0.214103	0.0622352	0.772663	-0.657078	0.000486099	0.707694	0.000109674
XLOC_001443	Bra028367	NA	M1	-0.109084	0.611882	-0.214675	0.313765	-0.159905	0.45544	0.0746331	0.728898	0.101297	0.63766	-0.0614348	0.775514	0.26385	0.212834	-0.0830751	0.699552	0.5829	0.00279642	-0.152836	0.475861	0.0283664	0.895321	-0.505485	0.0117435	-0.765848	1.29009e-05	0.603086	0.0018115	0.147324	0.4921	-0.226988	0.286131	0.691503	0.000182283	-0.172238	0.420944	-0.185479	0.38555	-0.558973	0.00451943	-0.771908	9.9707e-06	0.332284	0.112646
XLOC_001461	Bra028335	AT3G23690	M1	0.0760664	0.723888	-0.12009	0.576201	-0.0212228	0.92159	0.196622	0.357123	0.0277534	0.897572	-0.243015	0.25253	0.183733	0.390117	0.258348	0.222882	0.134065	0.532268	0.205917	0.334379	-0.100894	0.639005	-0.381053	0.0661905	-0.575006	0.00328936	0.550442	0.00531814	-0.246204	0.246163	-0.258992	0.22169	0.395867	0.0555076	-0.739112	3.69559e-05	0.106143	0.621567	-0.0427708	0.842702	-0.395536	0.0557307	0.543615	0.00603973
XLOC_001549	Bra023796,Bra023797	NA	M1	0.315924	0.132605	0.35365	0.0900143	0.33363	0.111108	-0.327698	0.118004	0.413376	0.0446599	-0.347768	0.0958721	-0.366283	0.078342	0.242221	0.254131	0.285989	0.175494	-0.152383	0.477185	0.685145	0.000220615	-0.905195	1.22924e-09	-0.388463	0.060666	0.223916	0.292877	0.425424	0.0382165	-0.353307	0.0903481	0.96732	1.34503e-14	-0.393936	0.0568192	-0.484986	0.0163031	-0.439931	0.0314573	-0.86795	3.93262e-08	0.505426	0.011755
XLOC_001571	Bra023822	AT3G22520	M1	0.364338	0.0800599	0.172669	0.419762	0.285698	0.175954	-0.485	0.0162994	0.607042	0.00165813	-0.364414	0.0799929	0.00521775	0.980695	0.181553	0.395862	0.0415506	0.847138	0.438612	0.0320294	0.172244	0.420926	-0.337565	0.1067	-0.219826	0.302013	0.115746	0.590175	-0.177578	0.40646	-0.168136	0.432256	0.415353	0.0435478	0.0482298	0.822918	-0.180664	0.39822	-0.170079	0.426877	-0.268637	0.204342	0.204738	0.337216
XLOC_001579	Bra023842	AT3G22240	M1	0.262057	0.216074	0.154318	0.471543	0.185644	0.385119	-0.0301525	0.888769	0.165302	0.440166	-0.388199	0.0608562	-0.151696	0.479198	0.497512	0.0133724	0.0208072	0.923121	0.250717	0.237333	0.14864	0.488199	-0.432357	0.0348557	-0.287743	0.172744	0.0351726	0.870391	-0.246828	0.244929	-0.620911	0.00120473	0.337799	0.106442	-0.231955	0.275432	0.356755	0.0870315	-0.410846	0.0461152	-0.257423	0.224602	-0.039755	0.853673
XLOC_001582	Bra023846,Bra023847	NA	M1	0.386627	0.0620006	0.316608	0.131723	0.361197	0.0828948	-0.175746	0.411397	0.36831	0.0765813	-0.459657	0.023833	-0.332141	0.112811	0.337368	0.106918	0.213731	0.315949	0.0210192	0.92234	0.588667	0.00247725	-0.92237	1.48013e-10	-0.440131	0.0313713	0.265695	0.209533	0.2063	0.333463	-0.448633	0.0278845	0.923013	1.35479e-10	-0.546559	0.00571916	-0.293207	0.164372	-0.441745	0.0306842	-0.814457	1.27427e-06	0.507453	0.0113678
XLOC_001624	Bra023904	AT3G21110	M1	0.339172	0.104937	0.276798	0.1904	0.29833	0.156782	-0.199712	0.349465	0.323764	0.122745	-0.518954	0.00936433	-0.331236	0.113854	0.509795	0.0109335	-0.0374623	0.86203	0.0417661	0.846354	0.400151	0.0526824	-0.729465	5.24224e-05	-0.373118	0.072525	0.304187	0.148413	-0.0695843	0.74663	-0.43257	0.0347566	0.672599	0.000317264	-0.42298	0.0394603	-0.258645	0.222332	-0.637376	0.000808282	-0.531237	0.00755719	0.18861	0.377436
XLOC_001628	Bra023912	AT3G20920	M1	0.167318	0.434531	0.269937	0.202075	0.196009	0.358656	-0.218268	0.305539	0.0936425	0.663402	-0.119563	0.57789	-0.360468	0.0835637	0.265262	0.210304	0.00586907	0.978286	-0.148273	0.489284	0.469746	0.0205543	-0.457899	0.0244454	-0.0291994	0.892264	-0.0559111	0.795259	0.359572	0.0843906	-0.327967	0.117685	0.398771	0.0535796	-0.657417	0.000481708	-0.0816228	0.704572	0.232983	0.273249	-0.351618	0.0920063	0.51539	0.00995115
XLOC_001632	Bra023923	NA	M1	-0.51655	0.00975684	-0.346705	0.0969606	-0.467993	0.0210962	0.239165	0.260357	-0.339316	0.104781	0.511489	0.0106279	0.299935	0.154456	-0.412536	0.0451392	0.645907	0.000651352	-0.685465	0.000218529	-0.00560045	0.97928	-0.111814	0.602945	-0.455161	0.025424	0.475847	0.018756	0.67261	0.000317161	0.205937	0.334331	0.352924	0.0907224	-0.396899	0.0548163	-0.217403	0.307507	0.279597	0.185771	-0.580894	0.00291537	0.656014	0.000500086
XLOC_001634	Bra023926	AT3G20800	M1	0.200942	0.346443	0.213714	0.315987	0.208564	0.328065	-0.34175	0.102155	0.330956	0.114179	-0.25853	0.222545	-0.262429	0.215398	0.132657	0.536622	0.27259	0.197505	-0.217188	0.307997	0.551211	0.00524165	-0.804647	2.13861e-06	-0.438949	0.0318827	0.349456	0.0941627	0.410028	0.0465936	-0.273973	0.19515	0.870051	3.33043e-08	-0.523867	0.00860285	-0.536272	0.00690558	-0.346285	0.0973928	-0.831457	4.8171e-07	0.562432	0.00422563
XLOC_001643	Bra023937	AT3G20670	M1	-0.180341	0.399079	-0.19706	0.356031	-0.202107	0.343596	-0.10716	0.61821	0.202054	0.343723	0.108727	0.613053	0.20138	0.34537	-0.288107	0.172179	0.659568	0.000454668	-0.41807	0.0420552	0.165084	0.440777	-0.478812	0.0179293	-0.660037	0.000448955	0.572326	0.00347264	0.493312	0.0143025	0.0275716	0.898239	0.723235	6.52022e-05	-0.074063	0.730894	-0.570392	0.00361015	-0.444884	0.0293816	-0.851204	1.34775e-07	0.386244	0.0622819
XLOC_001657	Bra038252	AT3G20050	M1	0.138139	0.519762	0.0933261	0.664474	0.119048	0.57954	-0.197134	0.355848	0.397134	0.0546601	-0.130712	0.542664	0.0766649	0.7218	0.0233505	0.913757	0.311731	0.138106	0.0748685	0.728075	0.250773	0.237226	-0.457737	0.0245022	-0.394302	0.0565684	0.34811	0.095524	0.226651	0.286866	-0.00476063	0.982386	0.630486	0.000957819	-0.385954	0.0624954	-0.320987	0.126176	0.140369	0.512979	-0.570617	0.00359392	0.721326	6.96311e-05
XLOC_001682	Bra038211	AT3G19500	M1	-0.0165415	0.93885	-0.226966	0.28618	-0.121667	0.571167	0.024122	0.910918	0.19014	0.373507	-0.21697	0.308496	0.255149	0.228866	0.0633098	0.768841	0.405823	0.0491149	0.0122816	0.954579	-0.0359994	0.867371	-0.578874	0.00303941	-0.843367	2.28116e-07	0.758829	1.72259e-05	-0.0361044	0.866987	-0.214929	0.313179	0.706015	0.000115785	-0.614899	0.00138614	-0.125877	0.557817	-0.364685	0.0797512	-0.750554	2.3931e-05	0.593771	0.00222112
XLOC_001801	Bra021205	NA	M1	0.394643	0.0563361	0.402737	0.0510313	0.400382	0.0525333	-0.357311	0.0865053	0.434253	0.0339789	-0.469658	0.0205813	-0.415953	0.0432149	0.348921	0.0947026	0.147454	0.491713	-0.039685	0.853928	0.673155	0.000312309	-0.941851	6.75933e-12	-0.378018	0.0685608	0.255961	0.227338	0.288109	0.172175	-0.376466	0.069798	0.955861	3.47928e-13	-0.531807	0.00748102	-0.477103	0.0184021	-0.443581	0.0299168	-0.81183	1.46806e-06	0.539238	0.0065442
XLOC_001844	Bra021124	AT3G15650	M1	0.403942	0.0502762	0.354153	0.0895258	0.39453	0.0564133	-0.29272	0.165106	0.400928	0.0521822	-0.418398	0.0418778	-0.367463	0.0773137	0.326531	0.119397	0.0925155	0.667224	0.0648252	0.76346	0.613071	0.00144576	-0.832842	4.42911e-07	-0.290746	0.168107	0.201937	0.34401	0.249117	0.240439	-0.313374	0.135932	0.834667	3.96086e-07	-0.689214	0.000195352	-0.311334	0.138636	-0.0885459	0.680752	-0.691605	0.000181716	0.707837	0.000109164
XLOC_001852	Bra021110	AT3G15450	M1	0.484154	0.0165149	0.481854	0.0171121	0.491925	0.014621	-0.398026	0.0540692	0.536953	0.00682118	-0.52405	0.00857549	-0.491571	0.0147033	0.378617	0.0680879	0.0881693	0.68204	0.00129955	0.995192	0.747201	2.72448e-05	-0.962867	5.37068e-14	-0.29437	0.162626	0.182183	0.394199	0.280008	0.1851	-0.358769	0.0851373	0.956776	2.77511e-13	-0.463889	0.0224098	-0.541071	0.00632886	-0.461797	0.0231047	-0.785394	5.4601e-06	0.481103	0.0173111
XLOC_001903	Bra021548,Bra021549	NA	M1	0.366672	0.0780016	0.512898	0.0103792	0.430378	0.0357902	-0.370703	0.0745411	0.254253	0.230562	-0.331764	0.113245	-0.595139	0.00215644	0.366107	0.0784962	0.137425	0.521945	-0.20173	0.344515	0.829854	5.30346e-07	-0.856063	9.57941e-08	-0.110124	0.608471	-0.111228	0.604859	0.489032	0.0153041	-0.544523	0.00593937	0.818238	1.03529e-06	-0.359011	0.084912	-0.285824	0.175755	-0.357032	0.0867696	-0.693142	0.000173397	0.334926	0.109642
XLOC_001930	Bra021516,Bra021517	NA	M1	0.428905	0.0364985	0.423158	0.0393683	0.422151	0.0398891	-0.382436	0.0651312	0.49159	0.0146989	-0.533041	0.0073181	-0.484647	0.016389	0.419119	0.0414899	0.0787297	0.714609	-0.0471552	0.826805	0.676143	0.000286811	-0.923985	1.18361e-10	-0.321509	0.125525	0.189053	0.376296	0.204679	0.337357	-0.394743	0.0562683	0.908218	8.73146e-10	-0.301937	0.151589	-0.46492	0.022074	-0.68075	0.000251047	-0.74356	3.12949e-05	0.267102	0.207039
XLOC_001959	Bra021472	AT3G02250	M1	0.501364	0.0125639	0.528783	0.00789294	0.526306	0.00824417	-0.450305	0.0272368	0.530287	0.00768568	-0.482134	0.0170386	-0.564675	0.00404384	0.468846	0.0208311	-0.069239	0.747848	0.0641563	0.765834	0.689	0.000196615	-0.660669	0.000441346	0.0318415	0.882579	-0.181585	0.395779	0.128073	0.550909	-0.36259	0.0816286	0.622979	0.00114722	0.197673	0.354507	-0.354792	0.0889087	-0.619802	0.00123656	-0.39943	0.0531497	-0.0984726	0.647112
XLOC_001978	Bra021445	NA	M1	-0.226373	0.287474	-0.0502637	0.815573	-0.173121	0.418529	-0.182538	0.393262	-0.0390243	0.856335	0.180259	0.399296	-0.0269063	0.900683	-0.0773136	0.719538	0.6028	0.00182303	-0.591654	0.00232449	0.319726	0.127756	-0.435078	0.0336031	-0.454977	0.0254908	0.216226	0.310197	0.6118	0.00148846	-0.32706	0.118764	0.609835	0.00155663	0.119701	0.577449	-0.310564	0.139667	-0.545176	0.00586796	-0.72763	5.59349e-05	0.0783328	0.715989
XLOC_001980	Bra021442	AT2G47770	M1	0.0853584	0.691684	0.110769	0.606359	0.0988171	0.645956	-0.178908	0.402896	0.274629	0.19404	-0.127941	0.551324	-0.157464	0.462441	0.0465434	0.829019	0.414337	0.0441167	-0.290416	0.168612	0.439401	0.0316861	-0.579856	0.00297851	-0.35431	0.0893741	0.207089	0.331574	0.379826	0.0671412	-0.169487	0.42851	0.717743	7.86567e-05	0.198715	0.351924	-0.42582	0.0380178	-0.647177	0.000630403	-0.692782	0.000175318	0.0729223	0.734892
XLOC_001987	Bra021430	AT3G02570	M1	0.307215	0.144213	0.431322	0.0353421	0.369624	0.0754557	-0.427605	0.0371326	0.441702	0.0307022	-0.283123	0.180052	-0.434658	0.033794	0.197676	0.354501	0.153889	0.472789	-0.206866	0.332108	0.743859	3.09439e-05	-0.797369	3.08363e-06	-0.1877	0.379785	0.157399	0.462627	0.52726	0.0081074	-0.111464	0.604088	0.877635	1.78319e-08	-0.434929	0.0336708	-0.628358	0.00100856	-0.136749	0.524012	-0.735999	4.14363e-05	0.653741	0.00053115
XLOC_001989	Bra021427,Bra021428	NA	M1	0.635133	0.000854589	0.454191	0.0257782	0.561073	0.00433906	-0.343703	0.100084	0.592906	0.00226287	-0.738926	3.72114e-05	-0.404057	0.0502045	0.615146	0.00137827	-0.160397	0.454038	0.435604	0.0333648	0.508388	0.0111927	-0.836099	3.62494e-07	-0.289013	0.170772	0.168024	0.432567	-0.226204	0.287843	-0.5127	0.0104139	0.730176	5.11144e-05	-0.536718	0.00685016	-0.212012	0.31995	-0.437701	0.0324294	-0.497012	0.0134806	0.34033	0.103681
XLOC_001992	Bra021421	AT3G02660	M1	0.440456	0.0312321	0.450916	0.0270032	0.443505	0.0299482	-0.313778	0.135401	0.42513	0.0383642	-0.540135	0.00643799	-0.468141	0.0210499	0.460979	0.0233807	0.102045	0.635163	-0.00223441	0.991733	0.685598	0.000217668	-0.968682	8.47321e-15	-0.365642	0.0789051	0.207266	0.331154	0.20546	0.335477	-0.478831	0.0179239	0.948441	1.85666e-12	-0.487527	0.0156696	-0.368919	0.0760583	-0.556302	0.00475784	-0.780004	6.9806e-06	0.425442	0.038207
XLOC_002011	Bra021384	AT3G02920	M1	0.113578	0.597203	0.0529285	0.805972	0.0801292	0.709748	-0.383151	0.0645883	0.308406	0.142583	-0.136668	0.524263	0.0561518	0.794396	0.1399	0.514402	0.361778	0.082365	0.0683793	0.750881	0.251072	0.236647	-0.485586	0.0161516	-0.473289	0.0194936	0.266864	0.207461	0.180636	0.398295	-0.376231	0.0699873	0.634663	0.000864564	-0.263476	0.213506	-0.120836	0.573817	-0.103937	0.628872	-0.598256	0.00201501	0.504913	0.0118547
XLOC_002019	Bra021372	AT3G03110	M1	0.103594	0.630012	0.0841361	0.695892	0.0778494	0.717671	-0.136406	0.525063	0.124991	0.560613	-0.2633	0.213824	-0.152887	0.475711	0.243201	0.252156	0.385607	0.0627514	-0.19827	0.353028	0.37224	0.0732532	-0.7719	9.97405e-06	-0.600953	0.0018991	0.379307	0.0675463	0.229851	0.279932	-0.47577	0.0187779	0.836161	3.61096e-07	-0.32616	0.119841	-0.160674	0.453248	-0.657502	0.000480615	-0.822375	8.20309e-07	0.298898	0.155956
XLOC_002027	Bra021358	AT3G03440	M1	-0.0995769	0.64341	0.0782196	0.716383	-0.0264953	0.902193	-0.369622	0.0754573	0.164112	0.443511	0.1759	0.410981	-0.0483008	0.822661	-0.286352	0.174924	0.464303	0.0222744	-0.423495	0.0391955	0.398818	0.0535494	-0.403029	0.050848	-0.268182	0.205139	0.116874	0.586533	0.710526	0.000100005	-0.103895	0.629011	0.566795	0.00387814	-0.222599	0.295799	-0.46423	0.0222984	0.0381482	0.859528	-0.657606	0.000479286	0.506416	0.0115645
XLOC_002040	Bra021339	NA	M1	0.592951	0.00226069	0.558029	0.00460247	0.601845	0.00186202	-0.542288	0.00618912	0.741492	3.38246e-05	-0.532079	0.0074448	-0.535284	0.0070296	0.414358	0.0441047	-0.106568	0.620162	0.224898	0.290709	0.737185	3.96763e-05	-0.746202	2.83072e-05	0.00738063	0.972696	-0.112073	0.602102	0.178727	0.40338	-0.299633	0.154892	0.715719	8.41984e-05	-0.254675	0.229763	-0.40869	0.0473848	-0.183941	0.389573	-0.470526	0.0203169	0.374405	0.0714675
XLOC_002073	Bra038724	NA	M1	0.165409	0.439865	0.121972	0.570195	0.135426	0.528074	-0.221225	0.298868	0.292183	0.165919	-0.247761	0.243092	-0.101096	0.63833	0.191486	0.370069	0.459497	0.0238883	-0.112235	0.601575	0.438442	0.032104	-0.792152	3.97294e-06	-0.603263	0.00180438	0.37585	0.0702942	0.302044	0.151437	-0.442547	0.030347	0.911262	6.11332e-10	-0.333831	0.11088	-0.279666	0.185658	-0.488292	0.0154829	-0.885396	9.00377e-09	0.462103	0.0230021
XLOC_002083	Bra038703	NA	M1	0.239201	0.260282	0.203632	0.339889	0.231424	0.276562	-0.142866	0.505433	0.246286	0.246	-0.306399	0.145336	-0.365846	0.0787254	0.250488	0.237776	0.0589483	0.784386	-0.136851	0.523702	0.411198	0.0459104	-0.529743	0.00776014	-0.139011	0.517104	0.0122681	0.954629	0.122081	0.569845	-0.318717	0.129029	0.469614	0.0205948	0.115808	0.589976	-0.219388	0.303001	-0.755736	1.95076e-05	-0.402886	0.0509378	-0.236406	0.266061
XLOC_002092	Bra038689,Bra038690	NA	M1	0.399426	0.0531523	0.344394	0.0993581	0.378392	0.0682651	-0.203128	0.34111	0.398136	0.0539972	-0.498914	0.0130733	-0.366802	0.0778885	0.402249	0.0513399	0.179845	0.400399	0.0189377	0.930012	0.601236	0.00188727	-0.930133	4.81892e-11	-0.428869	0.0365158	0.258464	0.222666	0.174427	0.414973	-0.440554	0.03119	0.93685	1.63612e-11	-0.451535	0.0267681	-0.29154	0.166895	-0.542485	0.00616678	-0.793764	3.67663e-06	0.434444	0.0338915
XLOC_002093	Bra038688	AT3G11930	M1	0.206914	0.331994	0.218559	0.304877	0.219941	0.301753	-0.170951	0.424474	0.367297	0.0774574	-0.26414	0.212312	-0.255652	0.22792	0.0937401	0.663071	0.319203	0.128415	-0.247327	0.243947	0.5521	0.00515424	-0.758382	1.75405e-05	-0.379795	0.0671651	0.324212	0.122199	0.38568	0.0626973	-0.0808349	0.707301	0.866866	4.28002e-08	-0.116671	0.587187	-0.633072	0.000899114	-0.582044	0.00284664	-0.798707	2.8862e-06	0.324658	0.121656
XLOC_002102	Bra038675	AT3G11710	M1	0.142416	0.506789	0.183663	0.390301	0.157001	0.463775	-0.268195	0.205116	0.333674	0.111058	-0.229817	0.280004	-0.245304	0.247948	0.147286	0.492214	0.366153	0.0784564	-0.323731	0.122786	0.557052	0.00468985	-0.823286	7.7872e-07	-0.500019	0.0128414	0.391308	0.0586422	0.45655	0.0249237	-0.256496	0.226334	0.934022	2.61393e-11	-0.344419	0.0993319	-0.57007	0.00363351	-0.538254	0.00666224	-0.897063	2.92312e-09	0.461969	0.0230469
XLOC_002123	Bra034231	NA	M1	-0.235959	0.266993	-0.0935539	0.663702	-0.209177	0.326614	-0.365404	0.0791152	0.0826782	0.700923	0.173215	0.418273	0.090328	0.674667	-0.10617	0.621478	0.356146	0.0876109	-0.370619	0.0746122	0.0969572	0.652207	-0.170696	0.425177	-0.338015	0.106204	0.220456	0.300594	0.396916	0.0548053	-0.110147	0.608397	0.342129	0.101751	0.00488298	0.981934	-0.248016	0.242593	-0.179198	0.402122	-0.415361	0.0435436	0.196346	0.357814
XLOC_002153	Bra034189	AT4G03140	M1	0.294605	0.162276	0.209569	0.325688	0.260487	0.218939	-0.409635	0.0468252	0.548187	0.00554807	-0.328708	0.116809	-0.100052	0.641819	0.105725	0.622946	0.18672	0.382323	0.114279	0.594925	0.347968	0.0956691	-0.526428	0.0082266	-0.307754	0.143474	0.240396	0.257837	0.0826845	0.700901	-0.0514329	0.811358	0.646521	0.000641154	0.120664	0.574366	-0.530239	0.00769223	-0.472114	0.0198404	-0.53343	0.00726739	0.181998	0.394687
XLOC_002168	Bra034165,Bra034166	NA	M1	-0.0329447	0.87854	-0.0855798	0.690923	-0.056402	0.793499	-0.0427384	0.84282	0.0487119	0.821176	-0.151637	0.479371	0.054355	0.800844	0.149788	0.484808	0.108397	0.614138	-0.0233602	0.913721	-0.0892907	0.678206	-0.148593	0.488338	-0.328026	0.117615	0.154176	0.471955	-0.193851	0.364077	-0.366357	0.0782776	0.13707	0.523029	0.270358	0.201346	0.0480904	0.823422	-0.756859	1.865e-05	-0.1624	0.448346	-0.423527	0.0391789
XLOC_002216	Bra034092	AT3G10070	M1	0.32161	0.1254	0.197821	0.35414	0.314732	0.134153	-0.364879	0.0795795	0.46164	0.0231574	-0.194915	0.361396	-0.218576	0.30484	-0.141439	0.509739	-0.193543	0.364854	0.155066	0.46937	0.306848	0.144717	-0.214519	0.314126	0.184099	0.389158	-0.0196506	0.927383	0.121967	0.570211	0.300271	0.153974	0.188967	0.376516	-0.174294	0.415333	-0.636146	0.000833396	0.180519	0.398604	-0.10635	0.620881	0.295779	0.16053
XLOC_002226	Bra034079	NA	M1	0.0832247	0.699036	0.044103	0.837865	0.0734495	0.733044	-0.0917122	0.669954	0.292207	0.165883	-0.185842	0.384604	-0.0498002	0.817245	0.0299199	0.889622	0.386812	0.061865	-0.217616	0.30702	0.367001	0.0777151	-0.717718	7.87241e-05	-0.574043	0.00335425	0.558186	0.00458854	0.346388	0.0972869	-0.00215073	0.992042	0.877042	1.87511e-08	-0.484327	0.0164706	-0.497802	0.0133101	-0.268222	0.20507	-0.85028	1.43622e-07	0.703251	0.000126495
XLOC_002240	Bra034052,Bra034054	NA	M1	0.332603	0.11228	0.343858	0.0999207	0.348931	0.0946921	-0.280467	0.18435	0.468488	0.0209421	-0.387277	0.0615253	-0.370794	0.0744642	0.211761	0.320536	0.189519	0.3751	-0.131161	0.541266	0.658906	0.000462856	-0.89131	5.17189e-09	-0.357452	0.0863729	0.307866	0.14332	0.380522	0.0666005	-0.173438	0.417663	0.945195	3.57867e-12	-0.495844	0.0137357	-0.600207	0.00193056	-0.372288	0.0732129	-0.826724	6.38132e-07	0.592765	0.00226974
XLOC_002255	Bra040048,Bra040049	NA	M1	0.323148	0.1235	0.401701	0.0516883	0.35765	0.0861857	-0.172023	0.421531	0.145437	0.497724	-0.384419	0.063635	-0.433643	0.0342592	0.356557	0.0872192	0.165546	0.439482	-0.082999	0.699815	0.63386	0.000881861	-0.831476	4.81151e-07	-0.270488	0.201121	0.0676424	0.753484	0.276616	0.190703	-0.530051	0.00771798	0.799692	2.74803e-06	-0.416986	0.0426459	-0.153311	0.474474	-0.453269	0.0261182	-0.682388	0.000239303	0.341547	0.102372
XLOC_002281	Bra040370,Bra040371	NA	M1	0.297944	0.157346	0.33005	0.115233	0.315798	0.132768	-0.511715	0.0105877	0.479741	0.0176763	-0.262354	0.215535	-0.32591	0.120143	0.093374	0.664312	0.289897	0.16941	-0.145475	0.49761	0.663882	0.000404375	-0.779741	7.06338e-06	-0.292349	0.165667	0.121572	0.57147	0.489902	0.0150961	-0.274909	0.193568	0.869127	3.58438e-08	-0.22876	0.282284	-0.554263	0.00494688	-0.336387	0.108006	-0.791346	4.12901e-06	0.45396	0.0258631
XLOC_002304	Bra040285	AT3G06670	M1	-0.141642	0.509126	-0.205543	0.335277	-0.173114	0.418547	0.0239149	0.91168	0.210941	0.322456	0.00144406	0.994657	0.20643	0.33315	-0.225016	0.290451	0.466648	0.0215198	-0.326819	0.119052	0.0728676	0.735084	-0.454083	0.0258179	-0.641828	0.000722749	0.730123	5.12122e-05	0.297138	0.158526	0.273696	0.195621	0.674674	0.00029911	-0.259967	0.219893	-0.632871	0.00090356	-0.343148	0.100669	-0.745386	2.92018e-05	0.529601	0.00777968
XLOC_002320	Bra040225	AT3G06350	M1	0.217066	0.308276	0.111414	0.604251	0.146177	0.495513	0.0508596	0.813424	0.177565	0.406497	-0.463804	0.0224377	-0.198579	0.352263	0.494679	0.0139941	-0.0660862	0.75899	0.0476818	0.8249	0.191785	0.36931	-0.618605	0.00127173	-0.435497	0.0334132	0.452685	0.0263359	-0.183301	0.391253	-0.2574	0.224644	0.561592	0.00429541	-0.632107	0.000920644	-0.0736652	0.732288	-0.435692	0.0333252	-0.443798	0.0298273	0.336815	0.107531
XLOC_002343	Bra040117	NA	M1	0.155204	0.468968	0.139919	0.514344	0.149357	0.486078	-0.237557	0.263672	0.385097	0.0631295	-0.244638	0.249276	-0.180281	0.399238	0.0950234	0.658729	0.382884	0.0647904	-0.257341	0.224755	0.516546	0.00975752	-0.836436	3.54971e-07	-0.549099	0.00545405	0.476117	0.0186793	0.428829	0.0365354	-0.157574	0.462122	0.965944	2.10349e-14	-0.455116	0.0254404	-0.576864	0.00316721	-0.417348	0.0424478	-0.928166	6.47947e-11	0.61546	0.0013683
XLOC_002369	Bra040508,Bra040509	NA	M1	0.341495	0.102427	0.352999	0.0906485	0.347027	0.0966299	-0.334808	0.109775	0.419394	0.0413429	-0.370005	0.0751319	-0.385548	0.0627952	0.294428	0.16254	0.279111	0.186571	-0.136023	0.526238	0.693648	0.000170732	-0.908338	8.61189e-10	-0.380639	0.0665102	0.194818	0.36164	0.387873	0.0610921	-0.431473	0.0352709	0.955452	3.84351e-13	-0.33155	0.113492	-0.454166	0.0257874	-0.519528	0.0092727	-0.853102	1.1812e-07	0.410428	0.0463593
XLOC_002376	Bra011902	AT4G38220	M1	-0.141897	0.508355	-0.281606	0.182498	-0.232908	0.273408	0.232269	0.274763	-0.150489	0.482741	-0.111479	0.60404	0.242091	0.254395	0.257608	0.224258	0.244381	0.24979	-0.0263134	0.902861	-0.20135	0.345444	-0.299981	0.154391	-0.662909	0.000415272	0.59669	0.00208506	-0.208561	0.328072	-0.359831	0.0841512	0.341286	0.102652	-0.536908	0.00682667	0.207437	0.330746	-0.312337	0.137301	-0.402056	0.0514625	0.291334	0.167209
XLOC_002383	Bra011887	AT4G38890	M1	0.443771	0.0298381	0.492935	0.0143885	0.462851	0.0227524	-0.401485	0.0518255	0.458175	0.0243482	-0.494296	0.0140799	-0.552476	0.00511775	0.444465	0.0295529	0.0780692	0.716906	-0.0880222	0.682544	0.777204	7.90958e-06	-0.954702	4.6021e-13	-0.258104	0.223335	0.116727	0.587006	0.325346	0.120822	-0.437359	0.0325805	0.932978	3.0913e-11	-0.447026	0.0285186	-0.446518	0.0287216	-0.487102	0.0157742	-0.763094	1.44674e-05	0.415762	0.0433204
XLOC_002392	Bra011877	NA	M1	0.105043	0.625204	0.16662	0.436477	0.123302	0.565964	-0.221112	0.299121	0.200261	0.348113	-0.117424	0.584759	-0.216146	0.31038	0.046643	0.828659	0.497654	0.013342	-0.35204	0.09159	0.579561	0.00299673	-0.797164	3.11484e-06	-0.47047	0.020334	0.267283	0.206721	0.578749	0.00304723	-0.345545	0.098159	0.912086	5.53826e-10	-0.332916	0.111923	-0.422941	0.0394804	-0.40297	0.0508846	-0.926572	8.18588e-11	0.485273	0.0162305
XLOC_002398	Bra011870	AT4G39250	M1	0.219626	0.302465	0.324695	0.121611	0.2872	0.173593	-0.38895	0.0603156	0.334482	0.110143	-0.0592915	0.78316	-0.251398	0.236019	-0.260336	0.219215	0.164344	0.442856	-0.12214	0.56966	0.502727	0.0122875	-0.364229	0.080157	0.080779	0.707495	-0.149828	0.48469	0.491251	0.0147778	0.0714073	0.740213	0.418251	0.0419574	0.0777291	0.71809	-0.60565	0.00171077	-0.0602485	0.779743	-0.39894	0.0534693	0.201366	0.345404
XLOC_002403	Bra011858	NA	M1	0.313755	0.135432	0.438556	0.032054	0.361918	0.0822374	-0.334584	0.110027	0.208439	0.328362	-0.377091	0.0692982	-0.511843	0.010565	0.42018	0.0409238	0.120081	0.57623	-0.179835	0.400423	0.676121	0.000286993	-0.789957	4.41077e-06	-0.203728	0.339655	-0.0076719	0.971618	0.288319	0.171848	-0.55979	0.00444848	0.757389	1.82572e-05	-0.14952	0.485599	-0.23336	0.27245	-0.65834	0.000469939	-0.632616	0.000909242	0.0819817	0.703331
XLOC_002422	Bra011824	AT4G39900	M1	-0.0313428	0.884406	0.00779968	0.971146	-0.000119763	0.999557	-0.165389	0.439921	0.35008	0.0935365	0.0617038	0.774556	-0.0290681	0.892746	-0.236868	0.2651	0.461667	0.0231484	-0.433081	0.034519	0.394796	0.056232	-0.491267	0.0147741	-0.363452	0.0808523	0.396916	0.054805	0.608763	0.00159494	0.225729	0.288884	0.707235	0.000111316	-0.0746026	0.729005	-0.781752	6.4508e-06	-0.224801	0.290923	-0.745642	2.89191e-05	0.476238	0.0186452
XLOC_002465	Bra011737	AT4G36970	M1	0.155043	0.469436	0.153082	0.475143	0.144709	0.4999	-0.21084	0.322694	0.282995	0.180258	-0.249235	0.240209	-0.187224	0.381015	0.179385	0.401625	0.442709	0.0302793	-0.231911	0.275525	0.515533	0.00992699	-0.845456	1.98813e-07	-0.572724	0.00344485	0.379803	0.0671591	0.39365	0.0570149	-0.385898	0.0625368	0.957062	2.58294e-13	-0.343625	0.100166	-0.376512	0.069761	-0.556136	0.004773	-0.925934	8.97702e-11	0.456027	0.025111
XLOC_002478	Bra011709	AT4G36810	M1	0.164495	0.442432	0.289334	0.170276	0.209191	0.326581	-0.593689	0.00222508	0.374719	0.0712108	-0.114986	0.592634	-0.185058	0.38665	0.184547	0.387986	0.109474	0.6106	-0.0307293	0.886654	0.391069	0.0588103	-0.302622	0.150617	-0.060474	0.778939	-0.0444563	0.836583	0.257625	0.224225	-0.180194	0.399469	0.416697	0.0428045	0.151424	0.479994	-0.30835	0.14266	-0.128295	0.550213	-0.301759	0.151843	0.167884	0.432955
XLOC_002493	Bra011664	AT4G36130	M1	0.348631	0.094996	0.317008	0.13121	0.341811	0.10209	-0.306359	0.145392	0.512287	0.0104864	-0.439188	0.0317788	-0.317821	0.130169	0.282026	0.181819	0.123001	0.566919	-0.0466433	0.828658	0.586725	0.00258111	-0.875417	2.14953e-08	-0.406549	0.0486722	0.426173	0.0378416	0.259115	0.221462	-0.104041	0.628526	0.943625	4.84731e-12	-0.601178	0.00188967	-0.598751	0.0019933	-0.292601	0.165285	-0.790418	4.31534e-06	0.706301	0.000114723
XLOC_002503	Bra011644	AT4G35850	M1	0.179132	0.4023	0.21162	0.320867	0.199567	0.349821	-0.191261	0.370644	0.296544	0.1594	-0.207043	0.331685	-0.23495	0.269103	0.143418	0.503773	0.368587	0.0763431	-0.222114	0.296881	0.582162	0.00283971	-0.80506	2.09378e-06	-0.429774	0.0360793	0.320166	0.127203	0.478398	0.018043	-0.21645	0.309684	0.925187	9.98944e-11	-0.480415	0.0174948	-0.404468	0.0499493	-0.221463	0.298335	-0.85892	7.79119e-08	0.680827	0.000250484
XLOC_002523	Bra011613	AT4G35410	M1	0.221393	0.298493	0.2029	0.341665	0.218861	0.304193	-0.158236	0.460221	0.263115	0.214158	-0.188821	0.376894	-0.136517	0.524724	0.19056	0.372432	0.0362942	0.866294	0.102012	0.635275	0.321601	0.125411	-0.45628	0.0250202	-0.195338	0.360335	0.175447	0.412206	0.179809	0.400493	-0.153913	0.472719	0.471292	0.020086	-0.782047	6.36509e-06	-0.158972	0.458109	0.385259	0.0630093	-0.39754	0.0543905	0.789354	4.53836e-06
XLOC_002529	Bra011605	AT4G35310	M1	0.316331	0.132079	0.438113	0.0322482	0.374743	0.0711911	-0.286305	0.174997	0.291446	0.167039	-0.297528	0.157954	-0.522607	0.00879296	0.242662	0.253241	0.200047	0.348641	-0.26288	0.214583	0.785908	5.33167e-06	-0.872403	2.75544e-08	-0.195468	0.360009	0.0293199	0.891823	0.539247	0.0065431	-0.386688	0.0619558	0.865963	4.59046e-08	-0.420286	0.040868	-0.43436	0.0339301	-0.356961	0.0868363	-0.77606	8.31977e-06	0.428651	0.0366219
XLOC_002544	Bra011574	AT4G34960	M1	-0.186146	0.383814	-0.0604834	0.778905	-0.139676	0.515082	0.105141	0.62488	-0.0756745	0.725257	0.0908302	0.672956	0.030158	0.888749	0.0610381	0.776927	0.41272	0.045034	-0.425016	0.0384217	0.199484	0.350027	-0.384304	0.0637209	-0.452777	0.0263014	0.415019	0.0437344	0.390462	0.0592379	-0.135282	0.528516	0.525253	0.0083975	-0.305309	0.146846	-0.263045	0.214285	-0.212989	0.317673	-0.58506	0.00267307	0.398838	0.0535361
XLOC_002546	Bra011571	AT4G34910	M1	0.60242	0.00183848	0.637622	0.000803332	0.625161	0.00108911	-0.482112	0.0170444	0.570052	0.00363481	-0.608828	0.00159259	-0.665785	0.000383764	0.499212	0.0130105	-0.110187	0.608265	0.0642154	0.765624	0.855903	9.68906e-08	-0.952753	7.24749e-13	-0.0816439	0.704499	0.0128692	0.952409	0.251599	0.235631	-0.340158	0.103867	0.886195	8.36904e-09	-0.48434	0.0164674	-0.523676	0.00863144	-0.350669	0.0929482	-0.64049	0.000747603	0.45916	0.0240047
XLOC_002548	Bra011568	AT4G34870	M1	0.509541	0.0109799	0.381384	0.0659353	0.461811	0.0230999	-0.215671	0.311471	0.598519	0.00200344	-0.637996	0.000795866	-0.311866	0.137927	0.542146	0.00620526	-0.0286822	0.894162	0.278307	0.187895	0.493144	0.0143407	-0.835802	3.69235e-07	-0.377272	0.0691539	0.357777	0.0860669	-0.101013	0.638608	-0.246538	0.245502	0.845651	1.96268e-07	-0.476334	0.0186182	-0.371921	0.0735192	-0.414786	0.0438644	-0.606057	0.00169525	0.498837	0.0130897
XLOC_002558	Bra011551	AT4G34670	M1	0.460283	0.023618	0.457641	0.024536	0.466916	0.0214347	-0.351537	0.0920866	0.527105	0.00812955	-0.506459	0.0115564	-0.487018	0.015795	0.386341	0.0622105	0.0562604	0.794007	-0.025268	0.906704	0.737238	3.96002e-05	-0.947865	2.09211e-12	-0.281804	0.182178	0.237347	0.264107	0.294463	0.162487	-0.250874	0.237029	0.95544	3.85492e-13	-0.57582	0.00323535	-0.550149	0.00534756	-0.329679	0.115667	-0.769856	1.08892e-05	0.615726	0.0013599
XLOC_002582	Bra011515	AT4G34265	M1	0.25056	0.237637	0.224174	0.292308	0.25079	0.237191	-0.207906	0.329628	0.378427	0.068238	-0.29778	0.157585	-0.252859	0.233217	0.0933551	0.664376	0.194296	0.362955	-0.124602	0.561844	0.535785	0.00696654	-0.785913	5.33053e-06	-0.369859	0.0752561	0.408346	0.04759	0.366096	0.0785059	-0.0159483	0.941039	0.861414	6.4816e-08	-0.656782	0.00048996	-0.563304	0.00415416	-0.126343	0.556347	-0.774313	8.98227e-06	0.772969	9.52347e-06
XLOC_002589	Bra011504	NA	M1	0.205462	0.335473	0.146994	0.493081	0.202823	0.341852	-0.0104909	0.961197	0.315153	0.133605	-0.268306	0.204922	-0.186685	0.382414	0.208805	0.327494	0.32029	0.127046	-0.109671	0.609955	0.447428	0.028359	-0.703783	0.000124366	-0.422794	0.0395561	0.279957	0.185183	0.24854	0.241566	-0.303413	0.1495	0.769516	1.1048e-05	-0.192525	0.367429	-0.318747	0.128991	-0.536039	0.00693469	-0.715309	8.53588e-05	0.276006	0.191723
XLOC_002592	Bra011500	AT4G34150	M1	-0.059494	0.782436	-0.0375524	0.861701	-0.0829326	0.700044	0.0539987	0.802124	-0.29376	0.163541	-0.0803473	0.708991	0.0139664	0.948356	0.29503	0.161642	0.310671	0.139523	-0.0444772	0.836508	0.0421993	0.844779	-0.342485	0.101372	-0.434488	0.0338714	0.0663256	0.758142	-0.0198872	0.926511	-0.769462	1.10735e-05	0.328189	0.117422	-0.222742	0.295482	0.599076	0.00197913	-0.376964	0.0693996	-0.372597	0.0729565	0.0208972	0.92279
XLOC_002605	Bra011482	AT4G33960	M1	-0.24373	0.251094	-0.306342	0.145415	-0.280986	0.183504	-0.0221264	0.918263	0.0633352	0.768751	0.112046	0.602189	0.292729	0.165092	-0.226612	0.286951	0.653351	0.000536655	-0.331304	0.113776	-0.0128034	0.952652	-0.341996	0.101892	-0.682626	0.000237637	0.50181	0.0124729	0.266694	0.207759	-0.159812	0.455708	0.562202	0.00424461	0.175157	0.412992	-0.244453	0.249645	-0.655656	0.000504875	-0.70242	0.000129879	0.0663639	0.758007
XLOC_002610	Bra011477	NA	M1	0.141655	0.509086	0.174597	0.414511	0.157036	0.463672	-0.283105	0.180082	0.391087	0.0587974	-0.176945	0.408162	-0.173785	0.416718	0.0219509	0.918909	0.38419	0.0638067	-0.275441	0.192672	0.541012	0.00633563	-0.77483	8.78138e-06	-0.469057	0.0207659	0.430111	0.0359177	0.515889	0.0098672	-0.0432519	0.840955	0.933777	2.71972e-11	-0.442713	0.0302777	-0.646897	0.00063497	-0.241394	0.255805	-0.891885	4.89229e-09	0.706675	0.000113347
XLOC_002620	Bra011450	AT4G33520	M1	0.109164	0.611618	0.0458395	0.831569	0.0852977	0.691893	0.180973	0.3974	-0.090193	0.675127	-0.227285	0.285484	-0.183635	0.390375	0.190821	0.371767	-0.240309	0.258016	0.0462261	0.830168	0.0388795	0.856862	-0.224182	0.292289	-0.057665	0.788975	0.128715	0.548897	-0.149666	0.485167	-0.135576	0.527614	0.0520534	0.809122	-0.622019	0.00117362	0.0626767	0.771092	-0.0486971	0.821229	-0.0388741	0.856882	0.150268	0.483392
XLOC_002621	Bra011449	AT4G33510	M1	-0.27018	0.201655	-0.388465	0.0606648	-0.342949	0.10088	0.281915	0.181999	-0.0552323	0.797694	0.0153395	0.943286	0.452171	0.0265282	-0.0581435	0.787263	0.536039	0.00693471	-0.187639	0.379942	-0.233955	0.271195	-0.321028	0.126123	-0.857276	8.77936e-08	0.861978	6.214e-08	-0.0196723	0.927303	0.00226539	0.991618	0.537209	0.00678963	-0.303765	0.149006	-0.162521	0.448002	-0.416915	0.0426847	-0.644272	0.000679209	0.420067	0.0409842
XLOC_002629	Bra011417	AT4G33140	M1	0.2614	0.217269	0.19629	0.357954	0.238907	0.260887	-0.0603601	0.779345	0.240702	0.257214	-0.267342	0.206616	-0.165804	0.43876	0.313527	0.135731	0.154884	0.469898	0.11273	0.599962	0.31166	0.138202	-0.403135	0.0507814	-0.163066	0.44646	-0.00786713	0.970897	-0.0156722	0.942058	-0.355784	0.0879563	0.429646	0.0361408	0.172597	0.419959	-0.023625	0.912747	-0.436422	0.0329974	-0.325085	0.121139	-0.0516762	0.810481
XLOC_002631	Bra011411	AT4G33080	M1	0.423755	0.0390622	0.214077	0.315147	0.335876	0.108576	-0.314832	0.134023	0.572821	0.00343811	-0.513986	0.0101904	-0.0399131	0.853097	0.174152	0.415719	-0.126136	0.557001	0.482827	0.0168574	0.143473	0.503609	-0.489088	0.0152907	-0.308769	0.14209	0.333114	0.111696	-0.261313	0.217428	-0.0556389	0.796235	0.472644	0.0196835	-0.560288	0.00440578	-0.342802	0.101035	-0.0451142	0.834197	-0.338533	0.105637	0.524014	0.00858087
XLOC_002633	Bra011407	AT4G33030	M1	0.0229922	0.915075	-0.142801	0.505631	-0.0581249	0.78733	0.181636	0.395644	0.150698	0.482128	-0.301622	0.152038	0.138366	0.519072	0.196993	0.3562	0.0911554	0.671848	0.0445907	0.836096	-0.0884511	0.681076	-0.463384	0.022576	-0.642456	0.000711336	0.734753	4.33598e-05	-0.20661	0.332719	-0.0290919	0.892659	0.500148	0.0128146	-0.706654	0.000113423	-0.17287	0.419215	-0.303573	0.149275	-0.483145	0.0167747	0.508285	0.0112119
XLOC_002654	Bra011375	AT4G32720	M1	0.496791	0.0135284	0.528596	0.00791903	0.513351	0.0103004	-0.408632	0.047419	0.497689	0.0133343	-0.53382	0.00721687	-0.56756	0.00381979	0.451344	0.0268405	0.0229873	0.915093	-0.0175585	0.935098	0.790776	4.24272e-06	-0.969441	6.49298e-15	-0.230712	0.278084	0.116543	0.587601	0.300275	0.153967	-0.39974	0.0529484	0.935683	1.99023e-11	-0.549105	0.00545352	-0.464387	0.0222471	-0.384714	0.0634145	-0.745334	2.92599e-05	0.514688	0.0100702
XLOC_002657	Bra011368	AT4G32660	M1	0.402638	0.0510938	0.54015	0.00643628	0.461134	0.0233285	-0.359257	0.084683	0.360234	0.0837788	-0.356987	0.0868115	-0.540876	0.00635148	0.293999	0.163182	0.0961948	0.654775	-0.141958	0.508171	0.79355	3.71469e-06	-0.816207	1.15814e-06	-0.0849057	0.693242	-0.0227808	0.915854	0.447805	0.0282098	-0.283718	0.179101	0.816823	1.11958e-06	-0.348187	0.095446	-0.469016	0.0207785	-0.245553	0.247455	-0.662671	0.000417981	0.444731	0.029444
XLOC_002671	Bra011343	AT4G32390	M1	0.252473	0.233955	0.159424	0.456816	0.192047	0.368643	-0.23273	0.273784	0.180026	0.399916	-0.413596	0.0445353	-0.146545	0.494418	0.435987	0.0331925	-0.121727	0.570973	0.273017	0.196776	0.0568362	0.791943	-0.283173	0.179973	-0.195418	0.360135	0.0221979	0.918	-0.39101	0.0588512	-0.500911	0.0126568	0.192417	0.367703	0.176582	0.409141	0.0803938	0.70883	-0.746455	2.80351e-05	-0.0897185	0.676746	-0.414712	0.0439059
XLOC_002681	Bra011333	AT4G32285	M1	0.443624	0.029899	0.434833	0.0337144	0.428259	0.0368126	-0.215049	0.312903	0.312165	0.13753	-0.563274	0.00415657	-0.466465	0.0215779	0.599959	0.00194116	-0.0211461	0.921873	0.113532	0.597351	0.57948	0.00300174	-0.877459	1.81002e-08	-0.317094	0.131099	0.119037	0.579576	0.0476882	0.824877	-0.655799	0.000502966	0.771441	1.01733e-05	-0.668414	0.000356803	-0.0686702	0.749854	-0.418574	0.0417828	-0.607817	0.00162942	0.389924	0.0596199
XLOC_002689	Bra011318	AT4G32050	M1	0.181188	0.396829	0.0901631	0.675229	0.154375	0.471377	-0.0926533	0.666756	0.271261	0.199786	-0.313508	0.135755	-0.118901	0.580011	0.183919	0.38963	0.313669	0.135544	-0.0760143	0.72407	0.395171	0.0559777	-0.817481	1.07967e-06	-0.599354	0.0019671	0.503271	0.0121785	0.219844	0.301973	-0.292365	0.165643	0.896109	3.22073e-09	-0.656531	0.000493252	-0.290197	0.168948	-0.336199	0.108215	-0.846805	1.8174e-07	0.678206	0.000270288
XLOC_002692	Bra011315	AT4G32020	M1	0.189747	0.374514	-0.00045808	0.998305	0.0997128	0.642954	-0.130589	0.543046	0.182857	0.392421	-0.32895	0.116523	-0.0311191	0.885226	0.217807	0.306586	0.238413	0.261903	0.141143	0.510636	0.144714	0.499887	-0.567945	0.00379071	-0.526212	0.00825779	0.230992	0.277485	-0.10001	0.64196	-0.65018	0.000583174	0.528809	0.00788928	-0.275748	0.192155	0.0975195	0.650314	-0.615114	0.00137929	-0.543716	0.00602853	0.0455576	0.83259
XLOC_002693	Bra011313	NA	M1	0.154249	0.471744	0.235438	0.268081	0.195294	0.360445	-0.253799	0.231423	0.333399	0.111371	-0.145445	0.497698	-0.257174	0.225067	0.0162901	0.939778	0.363334	0.080958	-0.313209	0.136149	0.615665	0.00136182	-0.746684	2.77908e-05	-0.336029	0.108405	0.286792	0.174232	0.585621	0.00264177	-0.0344031	0.873205	0.887433	7.46428e-09	-0.338013	0.106207	-0.627051	0.00104084	-0.219368	0.303045	-0.834601	3.97701e-07	0.623351	0.00113714
XLOC_002701	Bra011304	NA	M1	0.239723	0.259212	0.249506	0.239682	0.228656	0.282508	-0.19985	0.349125	0.301019	0.152899	-0.349997	0.0936197	-0.283149	0.18001	0.315231	0.133504	0.310925	0.139182	-0.17703	0.407933	0.569579	0.00366929	-0.904263	1.3628e-09	-0.523085	0.00872041	0.3863	0.0622405	0.329628	0.115727	-0.37654	0.0697386	0.969916	5.47625e-15	-0.530552	0.00764975	-0.381815	0.0656054	-0.468291	0.0210032	-0.889236	6.30429e-09	0.55492	0.00488532
XLOC_002718	Bra011273	NA	M1	0.0448874	0.83502	0.103783	0.629381	0.0740529	0.730929	-0.244081	0.25039	0.149422	0.485886	-0.0749367	0.727836	-0.0847946	0.693624	-0.11694	0.586321	0.103071	0.63175	-0.177854	0.40572	0.232045	0.275239	-0.379915	0.0670721	-0.243078	0.252403	0.248695	0.241263	0.296405	0.159605	-0.036267	0.866393	0.395288	0.0558981	-0.509001	0.0110792	-0.479828	0.0176529	-0.00887327	0.967176	-0.436791	0.0328327	0.449001	0.027741
XLOC_002733	Bra011251	AT4G31180	M1	0.3435	0.100297	0.320909	0.126272	0.334514	0.110106	-0.218378	0.305288	0.377553	0.0689302	-0.472697	0.0196678	-0.382824	0.0648359	0.368519	0.076401	0.180515	0.398614	-0.0925578	0.667081	0.587338	0.00254793	-0.894101	3.93756e-09	-0.417323	0.0424613	0.258295	0.22298	0.187725	0.37972	-0.420737	0.0406292	0.898092	2.63026e-09	-0.267605	0.206153	-0.383702	0.064173	-0.752108	2.252e-05	-0.778768	7.37805e-06	0.227416	0.2852
XLOC_002756	Bra011208,Bra011209	NA	M1	0.407545	0.0480698	0.435017	0.0336306	0.420483	0.0407636	-0.351688	0.091938	0.423918	0.0389792	-0.431431	0.0352906	-0.47007	0.0204554	0.381986	0.0654744	0.205184	0.336142	-0.0827716	0.7006	0.744905	2.97417e-05	-0.927382	7.2736e-11	-0.305769	0.146208	0.0932646	0.664683	0.347752	0.0958886	-0.49901	0.013053	0.938213	1.29534e-11	-0.313902	0.135238	-0.377837	0.0687041	-0.529491	0.00779487	-0.800096	2.69312e-06	0.357625	0.0862098
XLOC_002776	Bra011168	NA	M1	0.448702	0.0278575	0.401445	0.0518512	0.42798	0.0369487	-0.362208	0.0819747	0.483178	0.0167661	-0.478908	0.017903	-0.457745	0.0244994	0.34931	0.0943095	-0.0713226	0.740511	0.0460534	0.830794	0.537826	0.00671418	-0.636245	0.000831351	-0.0879393	0.682828	-0.0248338	0.9083	0.05405	0.80194	-0.377163	0.0692405	0.543433	0.00606003	0.021253	0.921479	-0.483416	0.0167046	-0.726428	5.83469e-05	-0.416225	0.0430642	-0.165796	0.43878
XLOC_002796	Bra011118	AT4G29510	M1	0.51406	0.0101778	0.559468	0.00447634	0.54138	0.00629305	-0.39039	0.0592892	0.472805	0.0196358	-0.514959	0.0100241	-0.620076	0.00122863	0.439396	0.0316885	0.0372106	0.862949	-0.0396063	0.854214	0.843965	2.19351e-07	-0.956948	2.65797e-13	-0.151165	0.480755	-0.00504872	0.981321	0.340045	0.103989	-0.446545	0.0287108	0.907581	9.39291e-10	-0.408629	0.0474213	-0.428878	0.0365115	-0.443125	0.030106	-0.71875	7.60217e-05	0.384641	0.0634692
XLOC_002800	Bra011108	AT4G29430	M1	0.171611	0.42266	0.111251	0.604784	0.139797	0.514716	-0.254189	0.230682	0.390036	0.0595402	-0.288134	0.172136	-0.11599	0.589385	0.17956	0.401157	0.385076	0.0631451	-0.135493	0.527869	0.44576	0.0290262	-0.836344	3.57006e-07	-0.629707	0.000976137	0.509436	0.0109992	0.312521	0.137058	-0.280117	0.184921	0.963449	4.52522e-14	-0.53388	0.00720904	-0.42764	0.0371154	-0.38602	0.0624468	-0.917026	3.00153e-10	0.659595	0.000454343
XLOC_002821	Bra011079	AT4G29040	M1	0.235666	0.267604	0.219511	0.302724	0.244113	0.250326	-0.381302	0.065999	0.475091	0.0189717	-0.28586	0.175699	-0.273982	0.195135	0.0927709	0.666358	0.129042	0.547874	-0.151674	0.479263	0.500201	0.0128037	-0.660303	0.000445741	-0.277676	0.18894	0.313778	0.135401	0.307214	0.144214	-0.00325587	0.987953	0.743791	3.10239e-05	-0.228615	0.282598	-0.650819	0.000573535	-0.408071	0.0477544	-0.644246	0.000679652	0.391364	0.0586024
XLOC_002830	Bra011038,Bra011067	NA	M1	0.0604321	0.779088	-0.0529811	0.805783	0.00366145	0.986453	0.269169	0.203412	-0.0620555	0.773303	-0.0991369	0.644884	0.148523	0.488545	0.0586164	0.785572	0.27807	0.188287	0.142309	0.507112	-0.0199388	0.926321	-0.28544	0.176362	-0.38713	0.0616324	0.193221	0.365667	-0.0607671	0.777893	-0.337355	0.106932	0.285991	0.175492	-0.381839	0.065587	0.2435	0.251555	-0.0395004	0.8546	-0.346902	0.0967579	0.279733	0.185549
XLOC_002873	Bra040160	AT4G17510	M1	0.201058	0.346159	0.184899	0.387064	0.207511	0.330568	-0.285483	0.176294	0.318821	0.128898	-0.101988	0.635355	-0.157514	0.462296	0.0401638	0.852184	0.0220341	0.918603	0.00982635	0.963653	0.347665	0.095977	-0.360207	0.083804	-0.0638349	0.766975	0.124522	0.562096	0.283866	0.178863	0.0435462	0.839886	0.40399	0.0502464	-0.536613	0.0068632	-0.390167	0.0594473	0.3576	0.0862327	-0.342592	0.101258	0.655583	0.00050586
XLOC_002904	Bra013282	AT4G18030	M1	0.102704	0.632969	0.125087	0.56031	0.10164	0.636514	-0.0300124	0.889282	0.163885	0.444149	-0.309691	0.140842	-0.0665488	0.757352	0.28688	0.174093	0.114573	0.593971	-0.0493587	0.81884	0.175118	0.413097	-0.55688	0.00470532	-0.513147	0.0103358	0.461453	0.0232203	-0.0119726	0.955721	-0.281729	0.1823	0.575054	0.00328617	-0.508377	0.0111947	-0.264196	0.212212	-0.433305	0.0344154	-0.534964	0.00707014	0.351453	0.09217
XLOC_002906	Bra013284	AT4G18100	M1	0.500453	0.0127513	0.504192	0.0119961	0.514575	0.0100895	-0.380488	0.0666266	0.595	0.00216294	-0.526646	0.0081953	-0.530148	0.00770465	0.369484	0.0755756	0.02016	0.925506	-0.0139611	0.948376	0.771309	1.02315e-05	-0.923157	1.32808e-10	-0.197871	0.354017	0.171214	0.42375	0.293704	0.163625	-0.175866	0.411074	0.930621	4.47133e-11	-0.407159	0.0483025	-0.619496	0.00124548	-0.394449	0.0564684	-0.72196	6.81323e-05	0.501191	0.0125993
XLOC_002935	Bra013339	NA	M1	0.067037	0.755625	-0.0898296	0.676367	0.0372131	0.862939	0.0414121	0.847641	0.37269	0.0728794	-0.177139	0.407642	0.18243	0.393546	-0.169998	0.4271	0.106892	0.619093	0.071687	0.739229	-0.0223419	0.917469	-0.32986	0.115455	-0.441728	0.0306912	0.614055	0.00141341	-0.0110345	0.959188	0.340708	0.103273	0.436569	0.0329318	-0.490236	0.0150167	-0.560805	0.00436175	-0.032739	0.879293	-0.430103	0.0359219	0.609748	0.00155973
XLOC_002953	Bra013368	NA	M1	0.239865	0.258923	0.359562	0.0844003	0.316454	0.131922	-0.345218	0.0984982	0.271813	0.198837	-0.0660369	0.759165	-0.364214	0.0801704	0.0516657	0.810519	0.199858	0.349104	-0.13067	0.542794	0.618835	0.00126492	-0.401172	0.0520255	0.12821	0.550481	-0.334801	0.109783	0.477349	0.0183334	-0.244525	0.249502	0.456888	0.0248032	0.246835	0.244915	-0.234825	0.269365	-0.130902	0.54207	-0.372279	0.0732202	0.07536	0.726356
XLOC_002959	Bra013374	AT4G19120	M1	-0.13797	0.52028	-0.0162739	0.939837	-0.122741	0.567745	-0.193944	0.36384	0.0704832	0.743464	0.0379573	0.860225	-0.0911596	0.671834	0.0741042	0.73075	0.46527	0.0219606	-0.530702	0.00762932	0.347326	0.0963233	-0.587691	0.002529	-0.540488	0.00639662	0.384707	0.0634198	0.540002	0.00645369	-0.343339	0.100467	0.706601	0.000113618	-0.397021	0.054735	-0.330185	0.115076	-0.375321	0.0707216	-0.796203	3.26535e-06	0.398195	0.0539583
XLOC_002967	Bra013392	AT4G19390	M1	-0.0194096	0.928272	-0.169598	0.428203	-0.0988688	0.645783	-0.0206003	0.923884	0.190186	0.373389	-0.103293	0.63101	0.261125	0.217772	-0.0222714	0.917729	0.558851	0.00453001	-0.031405	0.884178	0.0777589	0.717987	-0.573937	0.00336148	-0.787631	4.92085e-06	0.627298	0.00103467	0.160434	0.453933	-0.247626	0.243358	0.755426	1.975e-05	-0.496553	0.0135803	-0.167518	0.433972	-0.226859	0.286411	-0.819763	9.50845e-07	0.653202	0.000538756
XLOC_002995	Bra013439	AT4G20020	M1	0.188467	0.377804	0.165705	0.439035	0.170738	0.425059	-0.155133	0.469174	0.279761	0.185503	-0.34856	0.0950677	-0.186693	0.382393	0.278066	0.188293	0.3221	0.124793	-0.140547	0.512438	0.461374	0.0232473	-0.875836	2.07545e-08	-0.611517	0.00149812	0.486644	0.0158874	0.250671	0.237422	-0.359413	0.0845384	0.957969	2.05107e-13	-0.574508	0.00332276	-0.332522	0.112373	-0.487531	0.0156686	-0.888438	6.7962e-09	0.590022	0.00240693
XLOC_003008	Bra013462	AT4G20410	M1	-0.0367219	0.864732	0.0349015	0.871382	-0.0153474	0.943257	-0.209103	0.326789	0.147674	0.491062	0.101933	0.635536	0.00269213	0.990039	-0.0434795	0.840129	0.541796	0.00624532	-0.285276	0.176621	0.335526	0.108968	-0.392731	0.0576493	-0.345011	0.0987135	0.0992449	0.644522	0.47782	0.0182025	-0.334128	0.110543	0.558178	0.00458931	0.113451	0.597616	-0.224449	0.291701	-0.280903	0.18364	-0.62309	0.0011442	0.181473	0.396075
XLOC_003010	Bra013465	AT4G20440	M1	0.245428	0.247703	0.260826	0.218318	0.258678	0.222271	-0.173857	0.416523	0.345663	0.098036	-0.277977	0.18844	-0.275562	0.192468	0.189557	0.375001	0.149896	0.484489	-0.118408	0.581593	0.54272	0.00614017	-0.75794	1.78565e-05	-0.33155	0.113492	0.356064	0.0876886	0.379676	0.0672579	-0.0695022	0.74692	0.817177	1.09795e-06	-0.77666	8.1021e-06	-0.474967	0.0190071	0.03253	0.880058	-0.719348	7.44951e-05	0.847088	1.78331e-07
XLOC_003025	Bra013500	AT4G21090	M1	-0.242205	0.254163	-0.130972	0.541854	-0.219018	0.303839	-0.187903	0.379261	-0.0113059	0.958185	0.260452	0.219003	0.204785	0.337102	-0.264389	0.211865	0.496195	0.0136587	-0.329815	0.115508	0.0213924	0.920966	-0.020341	0.924839	-0.264582	0.211519	0.109033	0.612048	0.35806	0.085801	-0.0346541	0.872287	0.22035	0.300832	0.515159	0.00999029	-0.271047	0.200155	-0.357062	0.0867407	-0.34168	0.10223	-0.162274	0.448702
XLOC_003068	Bra013576	AT4G21960	M1	0.0706565	0.742854	-0.236848	0.265142	-0.0631961	0.769245	0.0895424	0.677347	0.292471	0.165483	-0.3443	0.0994565	0.319768	0.127702	0.198677	0.352019	0.0956406	0.656645	0.307884	0.143297	-0.277335	0.189506	-0.298766	0.156149	-0.67447	0.000300856	0.724951	6.14359e-05	-0.480043	0.0175949	-0.0463468	0.829731	0.372695	0.072875	-0.332727	0.112139	-0.0996607	0.643129	-0.431658	0.0351835	-0.336952	0.107378	0.26396	0.212635
XLOC_003070	Bra013580	NA	M1	0.460708	0.0234729	0.414681	0.0439232	0.444234	0.0296478	-0.381823	0.0655987	0.548505	0.00551518	-0.523332	0.0086832	-0.425504	0.0381763	0.407904	0.0478541	0.0704276	0.743659	0.0663875	0.757923	0.655514	0.000506784	-0.888016	7.06971e-09	-0.301066	0.152833	0.208061	0.329259	0.189861	0.374222	-0.282841	0.180506	0.90794	9.01517e-10	-0.408811	0.0473128	-0.410631	0.0462408	-0.398611	0.053685	-0.709415	0.000103705	0.497265	0.0134258
XLOC_003087	Bra013604	NA	M1	0.203452	0.340326	0.207485	0.33063	0.193805	0.36419	-0.195726	0.359363	0.238075	0.262601	-0.30657	0.1451	-0.275002	0.193411	0.292314	0.16572	0.359211	0.0847257	-0.206642	0.332643	0.54601	0.00577788	-0.875746	2.09122e-08	-0.531272	0.00755248	0.296123	0.160021	0.338224	0.105975	-0.553292	0.00503912	0.914686	4.03049e-10	-0.432397	0.0348372	-0.268482	0.204612	-0.58699	0.00256673	-0.879607	1.50556e-08	0.382274	0.0652547
XLOC_003090	Bra013610	AT4G22320	M1	0.584268	0.00271774	0.541366	0.00629473	0.544456	0.00594669	-0.435125	0.0335818	0.490452	0.0149656	-0.663544	0.000408134	-0.469274	0.0206992	0.616632	0.0013316	-0.164092	0.443567	0.350335	0.0932815	0.550931	0.00526942	-0.806202	1.97397e-06	-0.213767	0.315865	0.00104753	0.996124	-0.0913211	0.671284	-0.638543	0.000785065	0.672445	0.000318645	-0.603874	0.00178001	-0.0984716	0.647116	-0.317566	0.130495	-0.467344	0.0212998	0.341879	0.102017
XLOC_003094	Bra013616	AT4G22380	M1	0.0835566	0.69789	0.182423	0.393564	0.119244	0.57891	-0.208609	0.327959	0.184372	0.388443	-0.118063	0.582704	-0.234324	0.270418	0.0510029	0.812907	0.457863	0.0244579	-0.38931	0.0600577	0.573816	0.00336968	-0.756524	1.89025e-05	-0.418438	0.0418563	0.272681	0.197349	0.560509	0.00438687	-0.233194	0.272801	0.888116	7.00439e-09	-0.21457	0.314007	-0.447658	0.0282677	-0.449146	0.0276845	-0.874133	2.39116e-08	0.428438	0.0367252
XLOC_003100	Bra013624	AT4G22540	M1	0.213841	0.315693	-0.0553647	0.797219	0.109792	0.609559	0.377335	0.0691031	-0.0071827	0.973428	-0.360795	0.0832633	0.148508	0.488589	0.289187	0.170504	-0.100924	0.638904	0.468967	0.0207936	-0.237413	0.263969	-0.159711	0.455996	-0.314682	0.134219	0.269953	0.202049	-0.591677	0.00232335	-0.295288	0.161259	0.0454223	0.833081	-0.333778	0.11094	0.278727	0.187202	-0.26626	0.208529	-0.0118865	0.956039	-0.0118328	0.956237
XLOC_003128	Bra013675	NA	M1	-0.00917024	0.966078	0.000647548	0.997604	0.0102144	0.962218	0.00164601	0.99391	0.207215	0.331274	-0.0625296	0.771616	0.0790579	0.713468	0.164729	0.441775	0.00727125	0.9731	0.023533	0.913085	0.0132523	0.950993	-0.0716114	0.739495	-0.139268	0.516323	0.300348	0.153862	-0.0503973	0.815091	0.239069	0.260553	0.211659	0.320776	-0.0678287	0.752826	-0.131871	0.539059	0.100775	0.639402	-0.09284	0.666123	0.340591	0.103399
XLOC_003129	Bra013676,Bra013677	NA	M1	0.137363	0.522133	0.148377	0.488977	0.103785	0.629377	0.19221	0.368228	-0.24693	0.244729	-0.261729	0.21667	-0.213559	0.316348	0.525949	0.00829588	0.00428689	0.984139	0.0592274	0.783389	0.1589	0.458316	-0.381526	0.0658267	-0.199762	0.349342	0.000939475	0.996524	-0.140567	0.51238	-0.583517	0.00276073	0.263654	0.213186	-0.401409	0.051874	0.51412	0.0101674	-0.235094	0.268801	-0.199798	0.349253	0.0596335	0.781938
XLOC_003150	Bra013716	AT4G23620	M1	0.0295069	0.891136	-0.0997346	0.642882	-0.046321	0.829825	-0.0710081	0.741616	0.251972	0.234915	-0.238982	0.260734	0.145805	0.496625	0.144999	0.499034	0.436152	0.0331185	-0.0551008	0.798166	0.13109	0.541486	-0.679915	0.000257227	-0.809523	1.65941e-06	0.704736	0.000120636	0.0843056	0.695308	-0.260847	0.21828	0.830327	5.1554e-07	-0.559286	0.00449212	-0.247806	0.243003	-0.406575	0.0486564	-0.836537	3.5273e-07	0.623574	0.00113112
XLOC_003186	Bra013784	AT4G24270	M1	0.182984	0.392086	0.0126586	0.953186	0.123541	0.565205	0.0735255	0.732777	0.115792	0.590025	-0.360608	0.0834343	-0.0420363	0.845372	0.078567	0.715174	-0.0396812	0.853942	0.129603	0.54612	0.00911104	0.966297	-0.365443	0.0790802	-0.309682	0.140854	0.318134	0.12977	-0.26599	0.209009	-0.0777524	0.718009	0.306857	0.144705	-0.165183	0.440498	-0.156018	0.466611	-0.564698	0.00404205	-0.274517	0.194229	-0.0219557	0.918891
XLOC_003194	Bra013811	NA	M1	-0.33481	0.109773	-0.42304	0.039429	-0.390492	0.0592172	0.0887784	0.679957	-0.120565	0.574682	0.184818	0.387276	0.326931	0.118917	-0.288468	0.171617	0.641801	0.000723248	-0.421368	0.0402978	-0.114556	0.594029	-0.314447	0.134525	-0.739869	3.59338e-05	0.558587	0.00455319	0.282965	0.180307	-0.238413	0.261904	0.461873	0.023079	-0.128163	0.550627	-0.144626	0.500148	-0.565039	0.00401496	-0.699238	0.000143583	0.117805	0.583534
XLOC_003205	Bra013829	AT4G24740	M1	0.471949	0.0198894	0.337309	0.106983	0.435444	0.033437	0.0212459	0.921505	0.412865	0.0449509	-0.418279	0.0419424	-0.204087	0.338788	0.400572	0.0524108	-0.24498	0.248593	0.458271	0.0243145	0.269014	0.203683	-0.332574	0.112314	0.0412234	0.848328	0.0323738	0.88063	-0.219318	0.30316	-0.0609876	0.777107	0.268013	0.205435	-0.491396	0.0147439	-0.0625584	0.771513	0.286691	0.174391	-0.0661842	0.758643	0.465764	0.0218017
XLOC_003231	Bra013870	NA	M1	0.546916	0.00568122	0.580183	0.0029585	0.566164	0.00392688	-0.530545	0.00765069	0.533987	0.00719524	-0.530407	0.00766946	-0.614334	0.00140435	0.405108	0.0495539	-0.119883	0.576864	0.0586083	0.785601	0.777214	7.90617e-06	-0.874113	2.39527e-08	-0.0852226	0.692151	-0.0300129	0.889281	0.276516	0.19087	-0.42714	0.0373616	0.771049	1.03466e-05	-0.61469	0.00139287	-0.487822	0.0155973	-0.241314	0.255969	-0.597517	0.0020478	0.463472	0.022547
XLOC_003238	Bra013887	AT4G25340	M1	0.405029	0.0496027	0.366485	0.078165	0.390471	0.0592318	-0.254828	0.229472	0.412709	0.04504	-0.504039	0.0120262	-0.374297	0.0715558	0.377599	0.0688931	0.143307	0.504107	0.0293991	0.891532	0.617893	0.00129309	-0.945639	3.2797e-12	-0.417416	0.0424109	0.29478	0.162015	0.199646	0.349626	-0.379149	0.06767	0.953442	6.18664e-13	-0.600688	0.00191024	-0.341	0.102958	-0.407224	0.0482633	-0.801718	2.48239e-06	0.582424	0.00282427
XLOC_003255	Bra013915	AT4G25740	M1	-0.0337806	0.875481	-0.0966457	0.653255	-0.0705014	0.7434	-0.0724967	0.736386	0.245586	0.247388	-0.158421	0.45969	0.0785782	0.715136	0.016013	0.9408	0.480448	0.0174859	-0.273755	0.195521	0.211674	0.32074	-0.663231	0.000411643	-0.731144	4.93808e-05	0.677925	0.000272486	0.245406	0.247746	-0.0922309	0.668191	0.845288	2.01043e-07	-0.270292	0.20146	-0.479335	0.0177866	-0.613144	0.00144332	-0.869373	3.51505e-08	0.434857	0.0337034
XLOC_003266	Bra013948	NA	M1	0.321254	0.125843	0.208365	0.328538	0.279184	0.18645	-0.29192	0.166317	0.503259	0.012181	-0.454867	0.0255307	-0.202085	0.343648	0.206074	0.334004	0.103815	0.629276	0.0586873	0.785319	0.351013	0.0926065	-0.691898	0.000180104	-0.423676	0.0391029	0.334384	0.110253	0.0031659	0.988286	-0.269118	0.203501	0.69679	0.000154967	-0.165529	0.439528	-0.496853	0.0135151	-0.742556	3.25012e-05	-0.613988	0.00141557	0.107535	0.616973
XLOC_003287	Bra026489	NA	M1	0.327732	0.117964	0.315306	0.133406	0.310888	0.139233	-0.355587	0.0881451	0.370744	0.0745066	-0.423272	0.0393096	-0.323714	0.122807	0.293795	0.163487	0.267559	0.206234	-0.0603864	0.779251	0.584436	0.0027082	-0.907716	9.24864e-10	-0.47537	0.0188918	0.239894	0.258864	0.258443	0.222705	-0.518395	0.00945452	0.930761	4.37606e-11	-0.372574	0.0729754	-0.337938	0.106289	-0.616379	0.00133945	-0.847406	1.74561e-07	0.355835	0.0879076
XLOC_003291	Bra026484	AT5G23740	M1	0.203667	0.339805	0.261985	0.216205	0.231943	0.275457	-0.344658	0.0990822	0.385138	0.0630993	-0.268939	0.203814	-0.320434	0.126866	0.159512	0.456564	0.295091	0.161551	-0.291054	0.167637	0.627497	0.00102973	-0.835835	3.68485e-07	-0.406662	0.0486035	0.32595	0.120094	0.46668	0.0215095	-0.199136	0.350886	0.936453	1.74945e-11	-0.331993	0.11298	-0.613132	0.00144374	-0.476168	0.0186648	-0.861981	6.21264e-08	0.488915	0.0153322
XLOC_003296	Bra026477	AT5G23900	M1	0.184269	0.388713	0.152951	0.475525	0.169988	0.427127	-0.18471	0.387558	0.357423	0.0864003	-0.25727	0.224886	-0.178422	0.404199	0.100024	0.641911	0.309716	0.140807	-0.190287	0.37313	0.496171	0.0136639	-0.822252	8.26071e-07	-0.51449	0.010104	0.498549	0.0131507	0.399473	0.0531216	-0.0990681	0.645115	0.925217	9.94574e-11	-0.694723	0.000165186	-0.554443	0.00492989	-0.186737	0.382278	-0.880995	1.33415e-08	0.797389	3.08053e-06
XLOC_003297	Bra026475	AT5G23920	M1	-0.0485969	0.821591	-0.218493	0.305028	-0.138318	0.519218	-0.0664249	0.757791	0.255086	0.228986	-0.0981272	0.648272	0.281326	0.182951	-0.0750883	0.727306	0.501207	0.0125958	-0.0559834	0.795	-0.0097602	0.963897	-0.455228	0.0253996	-0.727924	5.53586e-05	0.642362	0.000713037	0.0677652	0.753051	-0.082986	0.69986	0.650034	0.000585396	-0.158644	0.45905	-0.314234	0.134804	-0.463325	0.0225955	-0.710698	9.9441e-05	0.361332	0.0827714
XLOC_003310	Bra026455	NA	M1	0.242831	0.252901	0.283629	0.179242	0.269224	0.203316	-0.231841	0.275673	0.382487	0.0650919	-0.265341	0.210164	-0.276213	0.191377	0.162784	0.447259	0.310547	0.13969	-0.188469	0.377801	0.604792	0.00174394	-0.757466	1.82008e-05	-0.33109	0.114024	0.257445	0.22456	0.401563	0.0517758	-0.117804	0.583538	0.885397	9.0028e-09	-0.135832	0.526825	-0.54755	0.00561443	-0.429962	0.0359894	-0.775258	8.61819e-06	0.426286	0.0377851
XLOC_003316	Bra026449	AT4G26300	M1	0.16848	0.431301	0.164976	0.441081	0.20341	0.340428	-0.179194	0.402133	0.322458	0.124349	-0.193366	0.365301	-0.277866	0.188625	-0.0215738	0.920298	0.0958552	0.655921	-0.209315	0.326288	0.420802	0.0405954	-0.47453	0.019133	-0.104542	0.626863	0.140798	0.511679	0.268822	0.204018	0.0699342	0.745397	0.511185	0.0106823	0.0894649	0.677612	-0.565232	0.00399975	-0.513246	0.0103186	-0.44885	0.0277998	0.0345541	0.872652
XLOC_003321	Bra026445,tRNA-Ile	NA	M1	0.165155	0.440577	0.14591	0.49631	0.155502	0.468106	-0.0905844	0.673793	0.290637	0.168274	-0.243596	0.251361	-0.184955	0.386919	0.136243	0.525565	0.42868	0.0366077	-0.242475	0.253617	0.518347	0.00946228	-0.84576	1.94843e-07	-0.548862	0.00547839	0.418391	0.0418818	0.407077	0.0483522	-0.270848	0.200499	0.952676	7.37701e-13	-0.407188	0.0482851	-0.460105	0.023679	-0.49245	0.0144999	-0.924816	1.05296e-10	0.518783	0.00939179
XLOC_003331	Bra026428	AT4G26500	M1	0.313644	0.135577	0.315689	0.132909	0.321717	0.125267	-0.526995	0.00814527	0.510227	0.0108548	-0.333721	0.111004	-0.291979	0.166228	0.193299	0.365471	0.106838	0.619271	-0.0349148	0.871334	0.559756	0.00445145	-0.717318	7.97935e-05	-0.292895	0.164841	0.255088	0.228982	0.310512	0.139736	-0.205531	0.335308	0.784255	5.7543e-06	-0.462983	0.0227087	-0.566592	0.00389376	-0.198864	0.351557	-0.665333	0.000388576	0.581884	0.00285612
XLOC_003336	Bra026421	NA	M1	0.366314	0.0783145	0.342836	0.100999	0.380375	0.066714	-0.135776	0.526997	0.347361	0.0962882	-0.34623	0.0974499	-0.291322	0.167228	0.170414	0.425953	0.145464	0.497642	0.0881464	0.682119	0.480683	0.017423	-0.567987	0.00378753	-0.124945	0.56076	-0.0852712	0.691984	0.12609	0.557145	-0.343941	0.0998333	0.558339	0.00457506	0.133846	0.532943	-0.238069	0.262613	-0.547577	0.0056116	-0.455218	0.0254033	-0.0463554	0.8297
XLOC_003347	Bra026403	AT4G26780	M1	0.436199	0.0330973	0.401098	0.052073	0.415215	0.0436249	-0.387726	0.0611987	0.490863	0.0148689	-0.525225	0.00840162	-0.381491	0.0658536	0.410554	0.0462858	0.142984	0.505078	0.0587844	0.784972	0.633833	0.00088244	-0.942501	5.9905e-12	-0.416574	0.0428723	0.245717	0.247128	0.187024	0.381533	-0.451489	0.0267855	0.956647	2.86533e-13	-0.487954	0.0155653	-0.379316	0.0675393	-0.479982	0.0176113	-0.796896	3.15621e-06	0.498046	0.0132578
XLOC_003356	Bra026387	AT4G27000	M1	0.242251	0.25407	0.365116	0.0793698	0.301134	0.152735	-0.337494	0.106778	0.220734	0.29997	-0.188134	0.378663	-0.429734	0.0360987	0.114663	0.593682	0.147991	0.490122	-0.21809	0.305943	0.627982	0.00101775	-0.643859	0.000686406	-0.101206	0.637963	-0.100562	0.640115	0.475757	0.0187815	-0.446225	0.0288388	0.593654	0.00222676	-0.328418	0.11715	-0.339763	0.104295	-0.280152	0.184864	-0.572854	0.00343585	0.233211	0.272767
XLOC_003360	Bra026380	AT4G27090	M1	0.258086	0.223367	0.273712	0.195594	0.273069	0.196688	-0.309745	0.140769	0.502516	0.0123299	-0.290782	0.168052	-0.275707	0.192224	0.1609	0.452603	0.24309	0.252379	-0.174994	0.413435	0.609377	0.00157291	-0.817349	1.08753e-06	-0.38637	0.0621888	0.376284	0.0699446	0.434407	0.0339086	-0.0715488	0.739715	0.933898	2.6667e-11	-0.515542	0.00992559	-0.640449	0.000748366	-0.201086	0.346091	-0.827704	6.02461e-07	0.727063	5.70624e-05
XLOC_003370	Bra026358	AT4G27340	M1	-0.097683	0.649765	-0.257498	0.224462	-0.178574	0.40379	0.157073	0.463566	0.0998516	0.64249	-0.141792	0.508672	0.254111	0.230831	0.04574	0.831929	0.529617	0.0077774	-0.156562	0.46504	-0.00238221	0.991186	-0.577729	0.00311166	-0.862946	5.77841e-08	0.775494	8.5293e-06	0.0565905	0.792823	-0.182838	0.392472	0.748077	2.63429e-05	-0.353377	0.0902795	-0.216272	0.310092	-0.597561	0.00204587	-0.810623	1.5656e-06	0.419168	0.0414636
XLOC_003379	Bra026341	AT4G27520	M1	0.198248	0.353082	-0.0329336	0.878581	0.0948865	0.659192	-0.2618	0.216541	0.364579	0.0798462	-0.299035	0.155757	0.284342	0.178105	0.151219	0.480596	-0.0197472	0.927028	0.575247	0.00327332	-0.248441	0.241759	-0.0488982	0.820503	-0.329365	0.116035	0.240571	0.25748	-0.513402	0.0102915	-0.165694	0.439067	0.10144	0.63718	0.00664035	0.975433	0.111758	0.603128	-0.121891	0.570451	-0.0218994	0.919098	0.0823742	0.701973
XLOC_003382	Bra026338	NA	M1	0.138687	0.518091	0.06484	0.763407	0.0857416	0.690366	-0.11032	0.607828	0.225677	0.288997	-0.323036	0.123638	-0.0639623	0.766523	0.258248	0.223067	0.404623	0.0498534	-0.0929744	0.665667	0.316882	0.131371	-0.79347	3.72909e-06	-0.697637	0.00015094	0.494091	0.0141262	0.134683	0.530359	-0.446057	0.0289063	0.884357	9.89396e-09	-0.379383	0.0674871	-0.18961	0.374865	-0.646168	0.000647001	-0.855464	9.99767e-08	0.38614	0.0623582
XLOC_003414	Bra026278	AT4G28170	M1	0.165135	0.440634	0.124003	0.563739	0.133204	0.534928	-0.19105	0.37118	0.231154	0.277139	-0.20912	0.326748	-0.0632812	0.768943	0.171082	0.424113	0.169996	0.427104	0.0728525	0.735137	0.256535	0.22626	-0.474972	0.0190058	-0.320169	0.127199	0.2356	0.267742	0.129219	0.54732	-0.17625	0.410036	0.537631	0.006738	-0.498929	0.0130702	-0.0884547	0.681064	0.0929765	0.66566	-0.471272	0.0200918	0.597025	0.00206989
XLOC_003440	Bra026229	NA	M1	-0.0734208	0.733144	-0.0890836	0.678914	-0.0414209	0.847609	0.168378	0.431585	0.0430313	0.841756	0.011116	0.958886	-0.0520841	0.809012	-0.298892	0.155965	0.155581	0.467875	-0.327302	0.118475	0.148501	0.488611	-0.265148	0.210508	-0.153117	0.47504	0.310906	0.139208	0.2829	0.180411	0.380234	0.066824	0.333042	0.111778	-0.0885513	0.680733	-0.471183	0.0201188	-0.260919	0.218147	-0.365217	0.0792804	0.199445	0.350124
XLOC_003446	Bra040105	AT4G17010	M1	-0.0102542	0.962071	-0.118563	0.581098	-0.0673635	0.75447	0.135041	0.529258	0.0983832	0.647413	-0.113921	0.596089	0.219888	0.301872	0.0085408	0.968406	0.201879	0.344152	0.142159	0.507565	-0.162297	0.448638	-0.113721	0.596736	-0.352294	0.0913401	0.232716	0.273814	-0.203001	0.341419	-0.103976	0.628744	0.174342	0.415204	0.0596161	0.782001	0.150982	0.481291	-0.282838	0.180511	-0.190826	0.371753	-0.0104614	0.961305
XLOC_003490	Bra038453	AT4G16390	M1	0.070165	0.744584	0.0257799	0.904822	0.0429666	0.841991	-0.0833772	0.698509	0.264706	0.211298	-0.264457	0.211744	-0.0945147	0.660449	0.137176	0.522705	0.326293	0.119681	-0.246008	0.246551	0.315115	0.133655	-0.734189	4.42567e-05	-0.620167	0.00122601	0.573309	0.00340444	0.218214	0.305662	-0.178688	0.403486	0.832135	4.62341e-07	-0.39228	0.0579623	-0.441635	0.0307305	-0.63033	0.000961459	-0.815404	1.21017e-06	0.401307	0.0519392
XLOC_003498	Bra033545	AT4G16190	M1	0.331808	0.113194	0.379969	0.0670294	0.345911	0.0977792	-0.28129	0.183011	0.304726	0.147659	-0.385614	0.0627461	-0.447571	0.0283022	0.383475	0.0643435	0.233281	0.272617	-0.164162	0.443369	0.70008	0.000139837	-0.919357	2.21807e-10	-0.357796	0.0860482	0.139294	0.516243	0.361177	0.0829132	-0.549945	0.0053681	0.917592	2.79127e-10	-0.392655	0.0577021	-0.327345	0.118424	-0.555984	0.00478689	-0.817255	1.09323e-06	0.347245	0.0964067
XLOC_003532	Bra033491	NA	M1	0.278961	0.186817	0.256589	0.22616	0.275243	0.193004	-0.233244	0.272695	0.380833	0.0663602	-0.405265	0.0494573	-0.268814	0.204032	0.242964	0.252632	0.153364	0.474321	-0.0756332	0.725401	0.510953	0.0107238	-0.855574	9.91943e-08	-0.466022	0.0217192	0.463188	0.0226408	0.242686	0.253193	-0.153305	0.474493	0.908003	8.95006e-10	-0.674559	0.000300091	-0.51057	0.0107929	-0.310064	0.140338	-0.796226	3.26167e-06	0.700382	0.000138517
XLOC_003534	Bra039541,Bra039542,Bra039543	NA	M1	0.212681	0.318389	0.123042	0.56679	0.195995	0.358689	0.00707396	0.97383	0.301298	0.152501	-0.137969	0.520281	-0.0711119	0.741251	-0.0149419	0.944754	-0.034378	0.873296	0.153085	0.475135	0.198363	0.352798	-0.232123	0.275073	-0.0139565	0.948393	0.122046	0.569957	0.104155	0.628148	0.146992	0.493087	0.229584	0.280508	-0.457043	0.0247479	-0.300637	0.153446	0.305838	0.146113	-0.179044	0.402535	0.482225	0.0170148
XLOC_003569	Bra036912	AT4G14920	M1	0.0124066	0.954118	0.0808462	0.707262	0.0368924	0.86411	-0.309074	0.141677	0.0937845	0.662921	0.118562	0.581101	0.0508119	0.813596	-0.129909	0.545167	0.337115	0.107198	-0.0720762	0.737862	0.232407	0.274469	-0.216489	0.309594	-0.180266	0.399277	0.0188663	0.930275	0.381628	0.0657482	-0.207202	0.331305	0.331521	0.113525	-0.19834	0.352853	-0.156506	0.465203	0.245778	0.247006	-0.387888	0.0610811	0.439278	0.0317394
XLOC_003621	Bra038890,tRNA-Val	NA	M1	0.458152	0.0243563	0.470231	0.0204066	0.475132	0.0189599	-0.431154	0.0354215	0.533089	0.00731182	-0.463	0.022703	-0.469763	0.0205491	0.339927	0.104117	0.096736	0.652951	-0.00635088	0.976504	0.7574	1.82488e-05	-0.927207	7.46295e-11	-0.263564	0.213347	0.159114	0.457703	0.349192	0.0944285	-0.330164	0.1151	0.941926	6.6657e-12	-0.56045	0.00439188	-0.512223	0.0104978	-0.253093	0.23277	-0.773018	9.50309e-06	0.631463	0.000935257
XLOC_003663	Bra037623	AT3G45040	M1	-0.0507033	0.813988	-0.12763	0.552299	-0.0887308	0.68012	-0.0704395	0.743618	0.0492302	0.819304	-0.0887655	0.680001	0.203565	0.340051	-0.134739	0.530189	0.546169	0.00576081	-0.0990969	0.645018	0.069888	0.74556	-0.500767	0.0126864	-0.679122	0.000263219	0.464494	0.0222122	0.143347	0.503988	-0.254023	0.230999	0.66158	0.000430578	-0.0699974	0.745175	-0.134113	0.532119	-0.565335	0.00399165	-0.732644	4.67945e-05	0.251444	0.235931
XLOC_003727	Bra029906	AT3G48560	M1	0.53437	0.00714594	0.601168	0.00189013	0.580167	0.00295948	-0.406072	0.0489627	0.535931	0.00694821	-0.491608	0.0146947	-0.569643	0.00366459	0.423884	0.0389965	-0.168277	0.431863	0.1388	0.517749	0.651229	0.000567407	-0.536128	0.00692361	0.18303	0.391966	-0.281803	0.182179	0.0589304	0.78445	-0.234807	0.269404	0.481307	0.017257	0.345892	0.0977995	-0.358802	0.0851062	-0.578207	0.00308131	-0.230996	0.277476	-0.220775	0.299878
XLOC_003745	Bra029922	AT3G48870	M1	-0.20525	0.335983	-0.337247	0.107052	-0.272803	0.197142	0.163964	0.443926	0.033849	0.875231	-0.0567064	0.792408	0.367599	0.0771954	-0.12341	0.565621	0.479313	0.0177924	-0.179491	0.401342	-0.153558	0.473753	-0.425936	0.0379597	-0.840681	2.71417e-07	0.870327	3.25767e-08	0.0271446	0.899807	0.0745651	0.729136	0.625357	0.00108401	-0.38807	0.0609494	-0.288221	0.172001	-0.444117	0.0296959	-0.710759	9.92433e-05	0.4988	0.0130975
XLOC_003753	Bra029932	AT3G49050	M1	0.347567	0.0960779	0.358352	0.0855272	0.35638	0.0873877	-0.338121	0.106088	0.474078	0.0192636	-0.385954	0.0624953	-0.347946	0.0956907	0.254558	0.229984	0.135462	0.527962	-0.0661948	0.758605	0.638196	0.000791896	-0.86348	5.54988e-08	-0.343116	0.100703	0.334656	0.109946	0.355908	0.0878378	-0.134901	0.529688	0.925603	9.41339e-11	-0.67323	0.000311645	-0.562724	0.00420155	-0.129356	0.546892	-0.783469	5.9655e-06	0.788578	4.70713e-06
XLOC_003776	Bra029967	AT3G49720	M1	0.259321	0.221082	0.265553	0.209786	0.271014	0.200212	-0.433358	0.0343906	0.472522	0.0197195	-0.11769	0.583905	-0.294804	0.161979	0.183	0.392044	0.0993209	0.644267	-0.0574892	0.789605	0.49768	0.0133364	-0.384117	0.0638614	0.00753138	0.972138	-0.161142	0.451915	0.34764	0.0960025	-0.286481	0.174721	0.403953	0.0502694	-0.0147173	0.945583	-0.326324	0.119645	-0.0656898	0.760394	-0.341997	0.101891	0.151535	0.479668
XLOC_003828	Bra035454	AT1G58250	M1	0.198057	0.353555	0.0347996	0.871755	0.132505	0.537091	0.130483	0.543376	0.155409	0.468375	-0.392138	0.0580617	-0.0235153	0.91315	0.283261	0.179831	-0.212877	0.317933	0.279047	0.186676	-0.127901	0.55145	-0.159127	0.457666	-0.197961	0.353793	0.230058	0.279487	-0.508039	0.0112578	-0.123348	0.565818	0.0557745	0.795749	0.0103824	0.961598	-0.041341	0.8479	-0.601765	0.00186532	0.0201446	0.925563	-0.301143	0.152722
XLOC_003837	Bra035439	AT1G58684	M1	0.467197	0.0213458	0.417476	0.0423782	0.448049	0.0281138	-0.425322	0.0382676	0.599088	0.00197862	-0.548473	0.00551844	-0.437515	0.0325113	0.39029	0.05936	0.0736568	0.732317	0.0317651	0.882859	0.677206	0.000278191	-0.953295	6.40116e-13	-0.362717	0.0815134	0.263177	0.214046	0.214606	0.313925	-0.341133	0.102816	0.957058	2.58532e-13	-0.506176	0.0116104	-0.521705	0.00893131	-0.476794	0.0184887	-0.785305	5.48261e-06	0.507484	0.011362
XLOC_003841	Bra035434	AT1G59600	M1	0.0317722	0.882833	-0.123981	0.563811	-0.0292775	0.891978	0.0601096	0.780239	0.121107	0.572951	-0.0776878	0.718234	0.236243	0.2664	-0.119356	0.578554	0.248236	0.242161	0.122699	0.567881	-0.0235172	0.913143	-0.2788	0.187082	-0.42761	0.0371305	0.444494	0.0295411	0.021963	0.918865	0.0489053	0.820477	0.380555	0.0665749	-0.503018	0.0122291	-0.156543	0.465096	0.15208	0.478073	-0.410563	0.0462803	0.611284	0.00150611
XLOC_003872	Bra031523	AT1G60160	M1	0.534087	0.0071824	0.481761	0.0171368	0.500582	0.0127246	-0.451386	0.0268245	0.522976	0.00873688	-0.575036	0.00328737	-0.497801	0.0133103	0.495803	0.0137446	-0.0890124	0.679157	0.165271	0.440252	0.591882	0.00231316	-0.700971	0.00013597	-0.0914685	0.670783	-0.0509082	0.813249	-0.0173039	0.936037	-0.434586	0.0338266	0.627255	0.00103576	0.0529197	0.806004	-0.368093	0.0767684	-0.723277	6.51076e-05	-0.421496	0.040231	-0.114434	0.594423
XLOC_003885	Bra031496	AT1G60600	M1	0.201526	0.345015	-0.059741	0.781555	0.0911598	0.671833	0.0704773	0.743485	0.375465	0.070605	-0.373149	0.0724991	0.086079	0.689207	0.100771	0.639417	0.234265	0.270543	0.119159	0.579184	0.113292	0.598133	-0.663204	0.000411947	-0.672861	0.000314915	0.693954	0.000169137	-0.0696613	0.746359	-0.0620393	0.773361	0.724265	6.29186e-05	-0.641038	0.000737337	-0.383414	0.0643902	-0.364176	0.0802047	-0.705005	0.0001196	0.583016	0.00278972
XLOC_003974	Bra028348	AT3G23820	M1	0.430772	0.0356029	0.539233	0.00654483	0.488899	0.0153362	-0.337888	0.106344	0.397834	0.0541964	-0.407022	0.0483852	-0.562452	0.00422394	0.506402	0.0115671	0.0179858	0.933522	-0.0425836	0.843382	0.733251	4.57821e-05	-0.694303	0.000167333	-0.0168057	0.937875	-0.178194	0.404808	0.248565	0.241517	-0.506304	0.011586	0.655279	0.000509963	0.0436766	0.839413	-0.311816	0.137994	-0.55299	0.00506806	-0.468154	0.021046	-0.0107411	0.960272
XLOC_003981	Bra028338	AT3G23710	M1	0.514879	0.0100377	0.552047	0.00515948	0.53452	0.00712674	-0.353886	0.0897844	0.470005	0.0204753	-0.559409	0.00448142	-0.597878	0.00203176	0.540294	0.0064194	0.0171843	0.936478	0.0206348	0.923757	0.78725	5.00931e-06	-0.915628	3.5829e-10	-0.158372	0.459831	-0.0151742	0.943896	0.206614	0.33271	-0.493986	0.0141498	0.871334	3.00468e-08	-0.233436	0.27229	-0.314464	0.134503	-0.586878	0.00257281	-0.648768	0.000604984	0.223817	0.293098
XLOC_003989	Bra028324,Bra028325	NA	M1	0.219397	0.30298	0.21386	0.31565	0.213837	0.315704	-0.241973	0.254632	0.334863	0.109712	-0.322149	0.124731	-0.261864	0.216424	0.216092	0.310505	0.350083	0.0935335	-0.198898	0.351472	0.563218	0.00416117	-0.892954	4.40838e-09	-0.528862	0.0078819	0.368114	0.07675	0.366842	0.0778533	-0.360901	0.0831654	0.972644	1.94914e-15	-0.425541	0.0381577	-0.432469	0.0348037	-0.541245	0.00630871	-0.9116	5.87093e-10	0.493114	0.0143477
XLOC_004054	Bra023732	AT3G23340	M1	-0.350637	0.0929802	-0.356783	0.0870048	-0.397495	0.0544203	0.213095	0.317425	-0.278032	0.188351	0.144891	0.499356	0.400364	0.0525445	-0.0954529	0.657278	0.512343	0.0104766	-0.265443	0.209982	-0.220799	0.299824	-0.266265	0.20852	-0.766236	1.26927e-05	0.674297	0.000302343	0.136326	0.52531	-0.188598	0.377468	0.421221	0.0403748	-0.636873	0.000818478	0.107119	0.618344	-0.0504002	0.815081	-0.588026	0.00251115	0.5884	0.00249133
XLOC_004129	Bra023844	NA	M1	-0.072267	0.737192	-0.216643	0.309242	-0.177198	0.407483	0.156063	0.466481	-0.210033	0.324593	-0.116351	0.588219	0.228931	0.281914	0.205856	0.334527	0.292049	0.166121	0.126395	0.556183	-0.246731	0.245121	-0.157215	0.463158	-0.514609	0.0100838	0.167547	0.433892	-0.315763	0.132814	-0.653352	0.000536638	0.134479	0.53099	0.0474835	0.825617	0.567561	0.00381974	-0.593601	0.0022293	-0.22783	0.2843	-0.297939	0.157352
XLOC_004130	Bra023845	NA	M1	0.0453337	0.833402	-0.0677372	0.753149	-0.00750638	0.972231	-0.0540612	0.8019	0.258485	0.222627	-0.204138	0.338663	0.150364	0.48311	0.011078	0.959027	0.462446	0.0228872	-0.0603437	0.779404	0.15916	0.45757	-0.668888	0.000352118	-0.763664	1.41298e-05	0.656687	0.000491207	0.156965	0.463879	-0.188591	0.377485	0.826586	6.43309e-07	-0.508869	0.0111034	-0.324488	0.121863	-0.372822	0.0727693	-0.849273	1.53849e-07	0.631231	0.000940583
XLOC_004263	Bra037586	AT3G18390	M1	0.249005	0.240657	0.289978	0.169284	0.262596	0.215096	-0.245439	0.247681	0.369354	0.0756859	-0.331561	0.113478	-0.333106	0.111705	0.26599	0.209009	0.286801	0.174219	-0.224259	0.292118	0.631682	0.000930263	-0.898549	2.50885e-09	-0.449103	0.0277013	0.343725	0.10006	0.405311	0.0494289	-0.296514	0.159443	0.974388	9.52125e-16	-0.461032	0.0233629	-0.506493	0.0115497	-0.467261	0.0213258	-0.882601	1.15789e-08	0.540783	0.00636226
XLOC_004272	Bra021318	NA	M1	0.3251	0.12112	0.370272	0.0749054	0.342558	0.101295	-0.245085	0.248385	0.333082	0.111732	-0.335629	0.108853	-0.405577	0.0492654	0.269523	0.202796	0.244574	0.249405	-0.166246	0.437522	0.702109	0.000131165	-0.871637	2.93203e-08	-0.301445	0.152291	0.183768	0.390025	0.424172	0.0388494	-0.290697	0.168181	0.921712	1.61902e-10	-0.410215	0.0464839	-0.440559	0.0311878	-0.342501	0.101355	-0.804633	2.1402e-06	0.528592	0.00791962
XLOC_004299	Bra021292	NA	M1	-0.0365974	0.865187	-0.249003	0.240662	-0.145627	0.497154	0.056379	0.793582	0.203605	0.339954	-0.181551	0.395868	0.345977	0.0977116	0.00619153	0.977093	0.48162	0.017174	0.03132	0.88449	-0.087274	0.685107	-0.527657	0.00805109	-0.880373	1.40865e-08	0.791863	4.02828e-06	-0.0524996	0.807516	-0.156509	0.465194	0.697407	0.000152028	-0.467751	0.021172	-0.195772	0.359249	-0.402707	0.0510505	-0.757563	1.81297e-05	0.54529	0.00585554
XLOC_004310	Bra021274	AT3G17790	M1	0.193577	0.364766	0.0329136	0.878654	0.113541	0.597323	0.0959672	0.655543	0.205045	0.336477	-0.349426	0.0941932	0.0122024	0.954872	0.347759	0.0958812	0.326513	0.119418	0.129099	0.547697	0.168703	0.430683	-0.592711	0.00227241	-0.576599	0.0031844	0.352045	0.0915857	-0.126172	0.556886	-0.463785	0.022444	0.652475	0.000549172	-0.0741623	0.730546	0.0448796	0.835048	-0.688535	0.000199385	-0.591884	0.00231305	0.0856351	0.690732
XLOC_004317	Bra021262	NA	M1	0.129589	0.546166	0.29688	0.158905	0.187825	0.379461	-0.29917	0.155562	0.226978	0.286153	-0.133931	0.532679	-0.355894	0.0878509	0.269538	0.202769	0.24882	0.241019	-0.352696	0.090945	0.632597	0.000909653	-0.699565	0.000142119	-0.264959	0.210844	0.176156	0.410291	0.553687	0.00500142	-0.2769	0.190229	0.783931	5.84047e-06	-0.459291	0.0239596	-0.394797	0.0562313	-0.140489	0.512617	-0.707093	0.000111828	0.575006	0.0032894
XLOC_004412	Bra021127,Bra021128	NA	M1	0.0153968	0.943075	-0.0591551	0.783647	-0.0147893	0.945317	0.0910254	0.672291	0.124019	0.563692	-0.121878	0.570494	0.0193679	0.928426	-0.0272073	0.899577	-0.00815655	0.969826	-0.0819192	0.703547	0.0463146	0.829848	-0.293313	0.164212	-0.266963	0.207285	0.537626	0.00673855	0.0610928	0.776732	0.390938	0.0589018	0.348853	0.0947713	-0.640177	0.00075351	-0.418901	0.0416067	0.144308	0.501103	-0.317096	0.131097	0.637158	0.00081268
XLOC_004474	Bra021579	NA	M1	0.287289	0.173454	0.394538	0.0564076	0.326315	0.119656	-0.14363	0.503136	-0.012012	0.955575	-0.267337	0.206625	-0.486007	0.0160461	0.333186	0.111614	0.0964846	0.653798	-0.0848142	0.693557	0.574098	0.00335054	-0.61069	0.00152664	-0.0376044	0.861512	-0.300558	0.15356	0.271366	0.199605	-0.685776	0.000216518	0.48912	0.0152831	-0.216894	0.308669	0.193034	0.366139	-0.353826	0.089843	-0.425502	0.0381773	0.0199059	0.926443
XLOC_004484	Bra021567	NA	M1	-0.042007	0.845478	0.106096	0.621722	-0.00806343	0.970171	-0.160481	0.453799	0.135198	0.528775	0.118778	0.580406	-0.0874401	0.684538	-0.0981721	0.648121	0.417285	0.0424823	-0.367649	0.077152	0.387612	0.0612814	-0.398458	0.0537849	-0.230864	0.27776	0.117579	0.584261	0.623326	0.00113782	-0.0985972	0.646694	0.52709	0.00813164	-0.243899	0.250754	-0.379272	0.0675734	0.0287054	0.894077	-0.582473	0.00282139	0.443609	0.0299053
XLOC_004506	Bra021519	AT3G13940	M1	0.276572	0.190777	0.145006	0.499011	0.221298	0.298706	-0.112351	0.601196	0.412479	0.0451718	-0.411189	0.0459159	-0.156648	0.464792	0.261927	0.21631	0.0394298	0.854857	0.0635641	0.767937	0.328207	0.1174	-0.724214	6.30299e-05	-0.467601	0.021219	0.541446	0.00628549	0.0675135	0.75394	-0.0604424	0.779052	0.742452	3.26289e-05	-0.882165	1.20362e-08	-0.425938	0.0379587	-0.0791278	0.713225	-0.642324	0.000713727	0.794022	3.63105e-06
XLOC_004532	Bra021477	AT3G02090	M1	0.199994	0.34877	0.273627	0.195737	0.242394	0.253783	-0.26717	0.20692	0.373384	0.0723053	-0.220492	0.300513	-0.29433	0.162687	0.0893677	0.677944	0.326158	0.119844	-0.287382	0.173308	0.615574	0.00136469	-0.764278	1.37744e-05	-0.341409	0.10252	0.259476	0.220796	0.492495	0.0144895	-0.115537	0.590852	0.882165	1.20359e-08	-0.162025	0.449407	-0.637285	0.00081012	-0.470936	0.0201929	-0.810336	1.58955e-06	0.407023	0.048385
XLOC_004626	Bra021333	NA	M1	-0.415337	0.0435569	-0.296622	0.159284	-0.366604	0.078061	0.0728663	0.735089	-0.148093	0.489819	0.423083	0.0394071	0.244428	0.249696	-0.487537	0.0156673	0.61815	0.00128533	-0.624771	0.00109931	0.0931063	0.665219	-0.225189	0.290069	-0.452464	0.0264183	0.496832	0.0135196	0.715255	8.55146e-05	0.279395	0.186103	0.480274	0.0175326	-0.415489	0.0434722	-0.404004	0.0502377	0.2486	0.241449	-0.67225	0.000320407	0.751735	2.2852e-05
XLOC_004651	Bra038714	AT3G12360	M1	0.339033	0.10509	0.333413	0.111356	0.337611	0.106649	-0.319308	0.128282	0.457307	0.0246542	-0.430011	0.0359656	-0.351125	0.0924952	0.313733	0.13546	0.217126	0.30814	-0.0937233	0.663128	0.63572	0.000842246	-0.925131	1.00684e-10	-0.437396	0.0325641	0.333379	0.111394	0.305217	0.146975	-0.295701	0.160645	0.987762	3.00182e-19	-0.458984	0.0240659	-0.486581	0.0159031	-0.468661	0.0208883	-0.853153	1.17695e-07	0.552917	0.00507513
XLOC_004675	Bra038682	AT3G11830	M1	0.348525	0.095103	0.302163	0.151269	0.329577	0.115786	-0.355929	0.0878178	0.492154	0.0145681	-0.421164	0.0404049	-0.2994	0.155229	0.253015	0.232917	0.14175	0.508799	-0.018929	0.930044	0.562286	0.0042377	-0.845746	1.95027e-07	-0.401649	0.0517209	0.372265	0.0732326	0.254077	0.230896	-0.155013	0.469522	0.903884	1.42067e-09	-0.583083	0.0027858	-0.51529	0.00996809	-0.256064	0.227144	-0.770421	1.06288e-05	0.677737	0.00027397
XLOC_004689	Bra034245	AT3G26700	M1	-0.0286005	0.894462	0.127752	0.551918	0.0251284	0.907217	-0.301962	0.151555	0.198718	0.351918	0.0569493	0.791538	-0.180943	0.397478	-0.0582314	0.786949	0.547726	0.00559601	-0.525956	0.00829497	0.567243	0.00384391	-0.647306	0.000628315	-0.388887	0.060361	0.224632	0.291296	0.737834	3.87414e-05	-0.208665	0.327827	0.824552	7.2405e-07	-0.136695	0.52418	-0.536969	0.00681917	-0.331758	0.113252	-0.868635	3.72653e-08	0.423472	0.0392071
XLOC_004723	Bra034192	AT4G03200	M1	0.0547401	0.799461	0.062577	0.771447	0.0355526	0.869003	-0.0492528	0.819222	0.122052	0.569939	-0.206613	0.332713	-0.161334	0.45137	0.26209	0.216014	0.433222	0.0344539	-0.317056	0.131147	0.416816	0.0427392	-0.771757	1.00358e-05	-0.596431	0.00209683	0.408189	0.0476837	0.320671	0.126569	-0.438915	0.0318974	0.859725	7.34456e-08	-0.322732	0.124013	-0.228268	0.283348	-0.640787	0.000742011	-0.8533	1.16488e-07	0.318048	0.12988
XLOC_004728	Bra034186	AT4G03115	M1	0.216536	0.309488	0.290844	0.167957	0.257223	0.224975	-0.442216	0.0304856	0.428403	0.0367422	-0.187054	0.381455	-0.243333	0.251891	0.0444296	0.83668	0.032979	0.878414	-0.0669178	0.756047	0.47275	0.0196521	-0.519927	0.00920929	-0.125919	0.557683	0.194253	0.363063	0.376131	0.0700674	0.115352	0.59145	0.604562	0.00175293	-0.570819	0.00357942	-0.507179	0.0114195	0.267686	0.20601	-0.4954	0.0138338	0.793178	3.78206e-06
XLOC_004742	Bra034164	NA	M1	-0.0594327	0.782655	-0.16036	0.454144	-0.13247	0.537199	-0.0796602	0.711376	-0.0307821	0.886461	-0.113802	0.596473	0.104451	0.627166	0.012791	0.952697	0.254574	0.229953	-0.0832513	0.698944	-0.0719804	0.738199	-0.314593	0.134334	-0.50522	0.011795	0.348418	0.0952115	-0.0547259	0.799512	-0.343435	0.100366	0.319797	0.127665	-0.129494	0.546461	-0.052425	0.807784	-0.614462	0.00140022	-0.421615	0.0401684	-0.077811	0.717805
XLOC_004767	Bra034124	AT3G10530	M1	0.623938	0.00112138	0.59457	0.00218317	0.628786	0.000998175	-0.347752	0.0958884	0.555682	0.00481467	-0.674033	0.000304622	-0.599585	0.00195718	0.513077	0.0103479	-0.0945995	0.660162	0.174539	0.414669	0.769529	1.10419e-05	-0.960847	9.52626e-14	-0.158966	0.458127	0.0453074	0.833497	0.0986316	0.646579	-0.420502	0.0407536	0.876706	1.92911e-08	-0.435127	0.0335805	-0.393105	0.0573903	-0.503131	0.0122065	-0.631658	0.000930812	0.355368	0.0883548
XLOC_004769	Bra034117,Bra034118,Bra034119,Bra034120,Bra034121	NA	M1	0.0111855	0.95863	0.21284	0.318018	0.0936301	0.663444	-0.11782	0.583485	-0.0423623	0.844187	0.0827269	0.700755	-0.271689	0.199049	-0.0585751	0.78572	0.397053	0.0547142	-0.415128	0.0436735	0.537015	0.00681349	-0.455032	0.0254709	-0.0754491	0.726045	-0.125138	0.560149	0.644423	0.000676585	-0.229253	0.28122	0.535301	0.00702748	0.00820735	0.969638	-0.202888	0.341695	-0.158084	0.460658	-0.558568	0.00455484	0.212841	0.318015
XLOC_004785	Bra034088,Bra034089	NA	M1	-0.147901	0.490389	-0.0595416	0.782267	-0.122016	0.570052	-0.248096	0.242436	0.0568951	0.791732	-0.00451251	0.983304	0.033158	0.877759	0.0375714	0.861632	0.241367	0.255861	-0.303591	0.149249	0.0713307	0.740482	-0.269169	0.203412	-0.40772	0.0479647	0.308837	0.141997	0.168706	0.430673	-0.266389	0.208301	0.355794	0.0879464	0.00596693	0.977924	-0.259569	0.220624	-0.551132	0.00524948	-0.412106	0.0453859	-0.0252204	0.906878
XLOC_004800	Bra034069	NA	M1	0.381411	0.0659149	0.439821	0.0315049	0.423582	0.039151	-0.380297	0.0667745	0.529962	0.00773017	-0.390612	0.0591323	-0.490995	0.0148378	0.257462	0.224528	0.117488	0.584553	-0.15681	0.464324	0.749315	2.5112e-05	-0.825335	6.9197e-07	-0.16945	0.428615	0.10134	0.637515	0.401782	0.0516366	-0.16155	0.450757	0.87172	2.91245e-08	-0.15548	0.468169	-0.616228	0.00134416	-0.481729	0.0171451	-0.706981	0.000112233	0.33732	0.106971
XLOC_004833	Bra040041	AT3G07940	M1	-0.105575	0.623442	0.0221539	0.918161	-0.0406749	0.850324	-0.255827	0.227589	0.230986	0.277499	0.130717	0.542648	-0.0583212	0.786628	-0.0932406	0.664764	0.411083	0.0459777	-0.452677	0.0263388	0.403267	0.0506984	-0.444612	0.0294929	-0.33158	0.113457	0.320304	0.127029	0.63943	0.000767805	0.0294159	0.89147	0.652513	0.00054862	-0.29891	0.155939	-0.519334	0.00930358	0.0393453	0.855165	-0.677208	0.000278174	0.646008	0.000649673
XLOC_004840	Bra040026,Bra040027	NA	M1	0.190167	0.373437	0.0731273	0.734173	0.134162	0.531966	-0.0541605	0.801543	0.185341	0.385909	-0.343457	0.100343	-0.0386232	0.857796	0.218656	0.304659	0.37788	0.0686701	0.0359615	0.867509	0.296805	0.159015	-0.769647	1.09865e-05	-0.654913	0.000514939	0.438752	0.0319683	0.0782614	0.716237	-0.466219	0.0216563	0.8378	3.25907e-07	-0.445026	0.029324	-0.0982366	0.647905	-0.528201	0.0079743	-0.802188	2.42413e-06	0.440997	0.0310009
XLOC_004881	Bra040279	AT3G06600	M1	0.291576	0.16684	0.296245	0.159841	0.315956	0.132564	-0.189087	0.376208	0.392199	0.0580192	-0.253586	0.23183	-0.34875	0.0948755	0.162172	0.448992	0.225964	0.288368	-0.12659	0.555569	0.596652	0.00208676	-0.612123	0.00147753	-0.116355	0.588206	-0.0221373	0.918222	0.331278	0.113806	-0.201618	0.344789	0.670953	0.000332337	0.187894	0.379284	-0.390871	0.0589495	-0.537609	0.00674069	-0.561916	0.00426842	0.0444235	0.836702
XLOC_004900	Bra040242	NA	M1	0.383535	0.0642988	0.369241	0.0757829	0.392267	0.0579712	-0.341723	0.102184	0.503295	0.0121738	-0.413163	0.044781	-0.332953	0.11188	0.239642	0.259379	0.208321	0.328641	0.00988607	0.963432	0.602241	0.00184578	-0.776924	8.00836e-06	-0.291177	0.167448	0.122835	0.567449	0.231439	0.276531	-0.301502	0.15221	0.833812	4.17447e-07	-0.0165587	0.938786	-0.456979	0.0247707	-0.609605	0.00156479	-0.694959	0.00016399	0.20252	0.342588
XLOC_004908	Bra040120	AT3G04790	M1	0.162268	0.448718	0.142604	0.506222	0.154494	0.47103	-0.194198	0.3632	0.372982	0.0726372	-0.281468	0.182722	-0.142197	0.50745	0.146398	0.494856	0.329794	0.115532	-0.186715	0.382335	0.461537	0.023192	-0.819108	9.86302e-07	-0.572674	0.00344834	0.549976	0.005365	0.337208	0.107094	-0.108594	0.613489	0.954793	4.50273e-13	-0.54914	0.00544989	-0.556819	0.00471088	-0.346931	0.0967287	-0.887815	7.20414e-09	0.709269	0.0001042
XLOC_004915	Bra040131	NA	M1	0.356136	0.0876205	0.305907	0.146017	0.34137	0.102562	-0.183281	0.391305	0.402599	0.0511186	-0.449981	0.0273616	-0.311292	0.138692	0.273313	0.196271	0.116576	0.587495	-0.00363289	0.986558	0.555927	0.00479214	-0.879727	1.48996e-08	-0.408329	0.0475997	0.40731	0.0482112	0.220217	0.301131	-0.156763	0.464461	0.905204	1.22803e-09	-0.718448	7.68034e-05	-0.491638	0.0146878	-0.248861	0.240938	-0.771751	1.00386e-05	0.723646	6.4282e-05
XLOC_004920	Bra040137	AT3G04510	M1	0.212562	0.318665	0.164365	0.442797	0.195378	0.360235	-0.128385	0.549931	0.43899	0.0318645	-0.32051	0.126771	-0.133971	0.532556	0.176717	0.408776	0.330063	0.115218	-0.120607	0.57455	0.454899	0.0255191	-0.800536	2.63444e-06	-0.552767	0.00508955	0.521743	0.00892553	0.27007	0.201846	-0.114607	0.593863	0.930946	4.25265e-11	-0.397085	0.0546925	-0.578773	0.00304571	-0.458362	0.0242828	-0.852128	1.26421e-07	0.566243	0.00392076
XLOC_004924	Bra040147	AT3G04110	M1	0.310343	0.139964	0.277706	0.188889	0.282899	0.180412	-0.355398	0.0883255	0.421529	0.0402137	-0.491788	0.0146528	-0.281767	0.182238	0.517967	0.00952386	0.0602786	0.779636	0.0514452	0.811313	0.416644	0.0428338	-0.727171	5.68465e-05	-0.422033	0.0399507	0.304006	0.148666	-0.0344025	0.873207	-0.421485	0.0402364	0.754738	2.02985e-05	-0.211563	0.321	-0.246628	0.245324	-0.66911	0.000349943	-0.586167	0.0026116	0.197825	0.35413
XLOC_004929	Bra040514	AT3G01410	M1	-0.212342	0.319178	-0.328284	0.117309	-0.286317	0.174978	0.183163	0.391616	-0.00111359	0.99588	0.144132	0.50163	0.441554	0.0307647	-0.0916035	0.670324	0.496191	0.0136596	-0.0476482	0.825021	-0.178109	0.405037	-0.178942	0.402806	-0.628392	0.00100771	0.579106	0.0030249	0.113406	0.597763	-0.0459173	0.831287	0.37454	0.0713574	-0.513179	0.0103303	0.0293713	0.891634	0.233201	0.272787	-0.488106	0.0155283	0.679525	0.000260159
XLOC_004935	Bra040506	AT3G01270	M1	0.307343	0.144037	0.294973	0.161727	0.290852	0.167944	-0.283081	0.18012	0.380751	0.066423	-0.377846	0.068697	-0.43244	0.0348174	0.339603	0.104469	0.0966694	0.653176	-0.162398	0.44835	0.579587	0.00299508	-0.783213	6.03561e-06	-0.276586	0.190753	0.162816	0.447169	0.275281	0.19294	-0.376597	0.0696934	0.745396	2.91913e-05	-0.351387	0.0922351	-0.410732	0.0461816	-0.560263	0.00440785	-0.656583	0.000492565	0.21411	0.315071
XLOC_004948	Bra028404	AT5G38290	M1	-0.135578	0.527607	-0.245789	0.246986	-0.180344	0.399071	0.0704081	0.743728	0.174964	0.413516	0.0241451	0.910833	0.223795	0.293145	-0.201247	0.345697	0.575916	0.00322904	-0.315485	0.133174	0.128611	0.549224	-0.542406	0.00617576	-0.719674	7.36721e-05	0.734109	4.43849e-05	0.373741	0.0720114	0.133961	0.532587	0.77571	8.44864e-06	-0.416533	0.0428946	-0.510036	0.0108895	-0.235213	0.268552	-0.860549	6.9113e-08	0.69596	0.000159003
XLOC_004981	Bra028461	NA	M1	0.419874	0.0410866	0.433679	0.0342425	0.428917	0.0364927	-0.29649	0.15948	0.464297	0.0222765	-0.458498	0.0242354	-0.462603	0.0228348	0.413621	0.0445207	0.141379	0.509921	-0.0671252	0.755313	0.73393	4.46729e-05	-0.942764	5.70325e-12	-0.321236	0.125864	0.201442	0.34522	0.326861	0.119001	-0.381411	0.065915	0.953961	5.4825e-13	-0.526536	0.00821107	-0.45193	0.0266191	-0.374033	0.0717721	-0.798105	2.97356e-06	0.548376	0.00552851
XLOC_005015	Bra028510	AT5G41860	M1	0.465192	0.0219859	0.414302	0.0441366	0.45023	0.0272655	-0.255568	0.228078	0.400875	0.0522157	-0.526005	0.00828782	-0.395717	0.0556084	0.479132	0.017842	0.130574	0.543093	0.121716	0.571008	0.639621	0.000764115	-0.907509	9.47016e-10	-0.353386	0.090271	0.162523	0.447996	0.126041	0.5573	-0.539299	0.00653687	0.896686	3.03765e-09	-0.444815	0.0294098	-0.240246	0.258144	-0.456489	0.0249454	-0.724851	6.16498e-05	0.431738	0.0351463
XLOC_005023	Bra028531	NA	M1	0.122682	0.567935	0.148558	0.488442	0.122566	0.568304	-0.092535	0.667158	0.129593	0.546153	-0.243217	0.252122	-0.301936	0.151591	0.296574	0.159356	0.199163	0.350818	-0.251438	0.235941	0.416852	0.0427193	-0.668756	0.000353418	-0.37565	0.0704552	0.17571	0.411494	0.249724	0.239257	-0.557268	0.00467037	0.621821	0.00117911	-0.365573	0.0789658	-0.155966	0.466762	-0.609622	0.00156421	-0.620098	0.00122801	0.105028	0.625256
XLOC_005031	Bra028547	NA	M1	0.72784	5.55236e-05	0.648192	0.000614091	0.705172	0.000118963	-0.386217	0.0623012	0.616713	0.00132911	-0.802303	2.41e-06	-0.61802	0.00128925	0.744505	3.01963e-05	-0.373242	0.0724227	0.428942	0.0364806	0.619665	0.00124056	-0.726691	5.78118e-05	0.0377758	0.860887	-0.110615	0.606863	-0.283624	0.179251	-0.425452	0.0382022	0.575357	0.00326597	-0.0809254	0.706987	-0.244978	0.248598	-0.625143	0.00108958	-0.240155	0.258329	-0.06283	0.770547
XLOC_005058	Bra028590	AT5G10360	M1	0.329989	0.115305	0.385852	0.0625707	0.359937	0.0840528	-0.349723	0.0938942	0.467151	0.0213604	-0.351548	0.0920756	-0.432837	0.0346321	0.250439	0.237871	0.194872	0.361505	-0.199806	0.349233	0.736338	4.09274e-05	-0.892538	4.59161e-09	-0.295606	0.160787	0.241025	0.256555	0.464461	0.0222229	-0.187615	0.380003	0.958518	1.77935e-13	-0.438508	0.032075	-0.61683	0.00132548	-0.340793	0.103181	-0.825518	6.84631e-07	0.584136	0.00272525
XLOC_005069	Bra028612	AT5G09880	M1	0.491672	0.0146798	0.338162	0.106043	0.436989	0.0327445	-0.185604	0.385224	0.47348	0.0194379	-0.587123	0.00255954	-0.276993	0.190075	0.379587	0.0673276	-0.334764	0.109824	0.432835	0.034633	0.279951	0.185193	-0.523997	0.00858338	-0.100741	0.639514	0.218133	0.305846	-0.269584	0.20269	-0.0633407	0.768731	0.426382	0.0377371	-0.705572	0.000117444	-0.183588	0.390499	0.0257017	0.905109	-0.206726	0.332442	0.529439	0.00780198
XLOC_005092	Bra028903	AT5G01430	M1	-0.139622	0.515247	-0.101336	0.63753	-0.145018	0.498977	-0.311396	0.138553	0.0670872	0.755447	0.234625	0.269787	-0.00210726	0.992203	-0.196242	0.358072	0.33886	0.105278	-0.338334	0.105854	0.203273	0.340759	-0.154182	0.471938	-0.132951	0.53571	0.0267907	0.901107	0.496647	0.0135599	-0.111866	0.602776	0.255363	0.228463	-0.0853512	0.691709	-0.197365	0.355274	0.0980191	0.648635	-0.365063	0.0794168	0.225574	0.289225
XLOC_005110	Bra028878	AT5G02260	M1	-0.146611	0.494223	-0.145093	0.498752	-0.175178	0.412936	-0.32098	0.126184	0.20759	0.330382	0.111941	0.602532	0.18109	0.397089	-0.243226	0.252105	0.632351	0.000915152	-0.359989	0.0840044	0.21335	0.316834	-0.487245	0.015739	-0.633154	0.000897317	0.51306	0.010351	0.51991	0.00921201	-0.0912292	0.671597	0.727676	5.58454e-05	-0.240664	0.25729	-0.509637	0.0109623	-0.221405	0.298465	-0.849595	1.50509e-07	0.550041	0.0053584
XLOC_005117	Bra028867	AT5G02610	M1	0.262426	0.215404	0.346066	0.097619	0.311595	0.138288	-0.297537	0.157941	0.447247	0.0284306	-0.218005	0.306136	-0.372547	0.0729981	0.133129	0.53516	0.215316	0.312288	-0.248585	0.241479	0.704569	0.000121283	-0.767488	1.20412e-05	-0.216977	0.308478	0.20518	0.33615	0.560124	0.00441978	-0.0640401	0.766247	0.858664	7.93808e-08	-0.467379	0.0212886	-0.648479	0.000609539	-0.088896	0.679555	-0.758822	1.72308e-05	0.678404	0.00026874
XLOC_005130	Bra028843	AT5G03290	M1	0.290994	0.167728	0.357699	0.0861399	0.31668	0.13163	-0.34936	0.0942598	0.373185	0.0724696	-0.302795	0.150373	-0.406571	0.0486587	0.270642	0.200855	0.288141	0.172126	-0.220227	0.301109	0.729307	5.27173e-05	-0.887948	7.1147e-09	-0.337104	0.10721	0.172015	0.421552	0.490314	0.0149984	-0.388294	0.0607878	0.950735	1.13754e-12	-0.393191	0.057331	-0.462944	0.0227216	-0.386807	0.0618688	-0.853259	1.16826e-07	0.507355	0.0113862
XLOC_005171	Bra028783	AT5G04600	M1	0.284092	0.178503	0.276282	0.191262	0.280406	0.184449	-0.239853	0.258948	0.385395	0.0629083	-0.349751	0.0938661	-0.294111	0.163014	0.246372	0.245831	0.320507	0.126775	-0.131747	0.539442	0.613886	0.00141892	-0.903373	1.50232e-09	-0.469103	0.0207516	0.318728	0.129015	0.364969	0.0794995	-0.338916	0.105217	0.981292	3.10524e-17	-0.452724	0.0263212	-0.418047	0.0420678	-0.432566	0.0347584	-0.889334	6.24613e-09	0.5627	0.00420357
XLOC_005173	Bra028778	NA	M1	0.310716	0.139463	0.321551	0.125472	0.317311	0.130821	-0.298977	0.155842	0.424732	0.0385653	-0.390159	0.0594527	-0.349809	0.0938082	0.269616	0.202634	0.188507	0.377702	-0.129216	0.547329	0.633339	0.000893231	-0.898415	2.54412e-09	-0.402009	0.0514919	0.364807	0.0796435	0.350095	0.0935222	-0.186585	0.382673	0.964572	3.22735e-14	-0.573071	0.00342084	-0.544736	0.00591598	-0.323598	0.122948	-0.833513	4.25147e-07	0.672014	0.000322547
XLOC_005180	Bra028766,Bra028767	NA	M1	0.532205	0.00742809	0.607076	0.00165686	0.602919	0.00181825	-0.362973	0.081283	0.643126	0.000699336	-0.44873	0.0278467	-0.59513	0.00215689	0.295878	0.160384	-0.270256	0.201523	0.0553939	0.797114	0.748902	2.55173e-05	-0.62451	0.00110618	0.204336	0.338185	-0.0452774	0.833606	0.275111	0.193227	0.159703	0.456018	0.593069	0.00225497	-0.347762	0.0958781	-0.729515	5.23294e-05	0.0254743	0.905945	-0.333879	0.110825	0.49108	0.0148179
XLOC_005203	Bra028734	AT5G06360	M1	0.375705	0.0704111	0.378655	0.0680582	0.379664	0.0672671	-0.335787	0.108676	0.466609	0.021532	-0.43938	0.0316955	-0.403739	0.0504031	0.318972	0.128707	0.204234	0.338431	-0.0928754	0.666003	0.686694	0.000210678	-0.931706	3.77898e-11	-0.378986	0.0677982	0.250272	0.238195	0.326251	0.119732	-0.33483	0.10975	0.9753	6.41606e-16	-0.377875	0.0686742	-0.512061	0.0105264	-0.526177	0.00826285	-0.837987	3.22094e-07	0.460053	0.0236969
XLOC_005215	Bra028708	NA	M1	0.382302	0.0652333	0.348685	0.0949405	0.366229	0.0783891	-0.281198	0.18316	0.471064	0.0201545	-0.46948	0.0206357	-0.363213	0.0810671	0.335179	0.109357	0.182412	0.393594	-0.0445887	0.836103	0.637319	0.00080944	-0.943087	5.36739e-12	-0.427942	0.0369676	0.340273	0.103743	0.267414	0.206489	-0.283267	0.179822	0.98411	5.22078e-18	-0.533254	0.00729032	-0.486472	0.0159302	-0.430843	0.0355688	-0.842325	2.44114e-07	0.585739	0.00263519
XLOC_005240	Bra028665	AT5G08300	M1	0.236556	0.265748	0.236564	0.265733	0.238024	0.262706	-0.419254	0.0414177	0.425364	0.0382462	-0.25964	0.220495	-0.181858	0.395056	0.164325	0.442911	0.211111	0.322059	0.0235508	0.91302	0.395316	0.0558793	-0.49152	0.014715	-0.224056	0.292568	0.0409748	0.849232	0.156497	0.465229	-0.246264	0.246044	0.595621	0.00213405	0.237315	0.264173	-0.225035	0.290408	-0.496109	0.0136774	-0.480553	0.0174578	0.0552116	0.797768
XLOC_005244	Bra028656	NA	M1	0.378935	0.0678379	0.374459	0.071423	0.381528	0.0658251	-0.314128	0.134942	0.414725	0.043899	-0.431207	0.0353966	-0.3923	0.0579485	0.321715	0.125269	0.176081	0.410493	-0.0493078	0.819023	0.676558	0.000283421	-0.929226	5.52983e-11	-0.370051	0.0750926	0.263397	0.213649	0.320051	0.127347	-0.330173	0.11509	0.962026	6.84407e-14	-0.579216	0.00301809	-0.443809	0.0298226	-0.321921	0.125014	-0.822618	8.09022e-07	0.63542	0.000848543
XLOC_005246	Bra028653	NA	M1	0.487376	0.0157067	0.321869	0.125078	0.411803	0.0455606	-0.350235	0.0933814	0.548314	0.00553486	-0.583662	0.0027524	-0.324611	0.121713	0.299158	0.15558	-0.0917008	0.669993	0.23019	0.279205	0.430399	0.0357802	-0.771516	1.01409e-05	-0.316119	0.132354	0.281874	0.182065	-0.0508042	0.813623	-0.254423	0.230241	0.68995	0.000191064	-0.598435	0.00200713	-0.437282	0.0326148	-0.389232	0.0601138	-0.556488	0.00474088	0.397599	0.0543516
XLOC_005249	Bra028648	NA	M1	-0.00425379	0.984261	-0.111229	0.604855	-0.058198	0.787068	0.0592251	0.783397	0.0940072	0.662167	-0.201448	0.345203	0.0851674	0.692341	0.189449	0.375279	0.127996	0.551151	-0.0537337	0.803077	-0.0482064	0.823003	-0.27437	0.194478	-0.441029	0.0309873	0.478045	0.0181401	-0.197059	0.356036	-0.0663192	0.758165	0.336394	0.107998	0.0629842	0.769999	-0.248741	0.241173	-0.679802	0.000258075	-0.317722	0.130295	-0.0983018	0.647686
XLOC_005263	Bra023312	NA	M1	0.315429	0.133247	0.300696	0.153363	0.303356	0.14958	-0.31025	0.140088	0.397063	0.0547072	-0.370331	0.0748555	-0.325253	0.120935	0.25802	0.223491	0.299074	0.155702	-0.107849	0.61594	0.626879	0.00104515	-0.913565	4.62831e-10	-0.45164	0.0267286	0.25521	0.228752	0.357919	0.0859333	-0.43176	0.0351357	0.958545	1.76699e-13	-0.450042	0.027338	-0.397974	0.0541038	-0.467145	0.0213624	-0.878541	1.65032e-08	0.490916	0.0148563
XLOC_005278	Bra023336	AT5G11670	M1	0.0637729	0.767196	0.0186072	0.93123	0.0311337	0.885172	0.208835	0.327422	-0.0760373	0.72399	-0.204522	0.337737	-0.0980037	0.648687	0.329817	0.115505	0.305753	0.146229	-0.0768014	0.721324	0.179819	0.400468	-0.475485	0.018859	-0.410419	0.0463647	0.1076	0.616759	-0.00813042	0.969923	-0.602637	0.00182966	0.458005	0.0244078	0.0113376	0.958067	0.30922	0.141479	-0.702357	0.000130137	-0.456896	0.0248001	-0.167063	0.435241
XLOC_005281	Bra023340	AT5G11750	M1	0.0540936	0.801783	0.0220058	0.918707	0.0205824	0.92395	-0.117781	0.583612	0.183431	0.390911	-0.208967	0.32711	-0.0211266	0.921945	0.174992	0.41344	0.4937	0.0142145	-0.209848	0.325029	0.341696	0.102213	-0.773469	9.31884e-06	-0.712966	9.228e-05	0.545396	0.00584404	0.280488	0.184315	-0.364555	0.0798674	0.918142	2.59992e-10	-0.418624	0.0417559	-0.285414	0.176402	-0.52061	0.00910168	-0.915592	3.59938e-10	0.521947	0.00889399
XLOC_005384	Bra023529	AT5G15640	M1	0.365915	0.0786649	0.379333	0.0675259	0.377478	0.0689899	-0.236357	0.266164	0.334686	0.109912	-0.379014	0.0677762	-0.42614	0.0378579	0.369903	0.0752183	0.142793	0.505654	-0.0689817	0.748755	0.670378	0.000337739	-0.85546	1.00001e-07	-0.281374	0.182874	0.139114	0.516793	0.320107	0.127277	-0.452016	0.0265868	0.836491	3.5376e-07	-0.558898	0.00452592	-0.334522	0.110098	-0.29588	0.160381	-0.723694	6.41754e-05	0.497453	0.0133853
XLOC_005387	Bra023536	AT5G15750	M1	0.42735	0.0372583	0.460586	0.0235147	0.444547	0.0295192	-0.365364	0.0791504	0.438148	0.0322328	-0.447446	0.0283519	-0.483983	0.0165587	0.35537	0.0883526	0.113365	0.597894	-0.0530056	0.805695	0.748954	2.54653e-05	-0.939618	1.01244e-11	-0.280697	0.183974	0.154994	0.469579	0.364204	0.0801798	-0.386507	0.0620884	0.93102	4.2043e-11	-0.609454	0.00157017	-0.453348	0.0260891	-0.288888	0.170966	-0.783243	6.02745e-06	0.598561	0.0020016
XLOC_005413	Bra023577	AT5G16620	M1	-0.158123	0.460545	-0.297966	0.157313	-0.238288	0.262162	0.152931	0.475584	0.0630261	0.76985	-0.104183	0.628056	0.246191	0.246189	-0.00577236	0.978644	0.478462	0.0180253	-0.250818	0.237138	-0.0474804	0.825628	-0.507935	0.0112772	-0.817063	1.10486e-06	0.793127	3.79123e-06	0.058403	0.786335	-0.0735737	0.732608	0.669919	0.000342116	-0.293452	0.164002	-0.290346	0.168719	-0.646721	0.000637862	-0.750605	2.38838e-05	0.32199	0.124928
XLOC_005414	Bra023578	NA	M1	0.191789	0.369298	0.19003	0.37379	0.185512	0.385465	0.0570654	0.791122	0.229271	0.281181	-0.374613	0.0712975	-0.22713	0.285821	0.527759	0.0080366	0.117749	0.583715	-0.0572815	0.790348	0.348134	0.0954999	-0.641332	0.00073188	-0.409404	0.0469615	0.33774	0.106507	-0.00233566	0.991358	-0.327493	0.118248	0.676185	0.000286471	-0.267475	0.206382	-0.117879	0.583294	-0.556419	0.00474715	-0.534682	0.0071061	0.232407	0.274469
XLOC_005424	Bra023593	AT5G17020	M1	0.446951	0.0285486	0.517303	0.00963256	0.471306	0.0200819	-0.389338	0.0600377	0.388105	0.0609244	-0.485525	0.016167	-0.518547	0.00942992	0.456581	0.0249125	-0.225162	0.29013	0.154957	0.469686	0.577099	0.00315206	-0.635557	0.000845661	0.0121361	0.955117	-0.114734	0.593451	0.100499	0.640324	-0.398292	0.0538941	0.516038	0.00984227	-0.567667	0.00381168	-0.140346	0.513048	-0.0730976	0.734277	-0.31442	0.13456	0.378424	0.0682398
XLOC_005458	Bra023675	AT5G18460	M1	0.134719	0.530251	0.137867	0.520593	0.149558	0.485484	-0.10084	0.639186	0.202564	0.342481	-0.0967137	0.653027	-0.202346	0.343013	0.0176801	0.934649	0.410064	0.0465726	-0.249982	0.238757	0.537617	0.0067397	-0.709304	0.000104079	-0.366588	0.0780756	0.203298	0.340698	0.535526	0.00699901	-0.288199	0.172035	0.782957	6.10677e-06	-0.478584	0.0179917	-0.350367	0.0932497	-0.146798	0.493665	-0.799281	2.80492e-06	0.577361	0.00313515
XLOC_005461	Bra023680	NA	M1	0.500846	0.0126702	0.645289	0.000661762	0.548224	0.00554423	-0.540871	0.00635208	0.281242	0.183088	-0.527907	0.00801569	-0.632831	0.00090446	0.56744	0.00382889	-0.285848	0.175717	0.117154	0.585629	0.666882	0.000372308	-0.713371	9.10512e-05	0.0263245	0.90282	-0.135769	0.527021	0.111861	0.602792	-0.52084	0.00906568	0.557241	0.00467286	-0.648146	0.000614817	-0.207354	0.330942	-0.120319	0.57547	-0.351416	0.0922063	0.382634	0.0649807
XLOC_005476	Bra023702	AT5G19090	M1	0.431408	0.0353017	0.253307	0.232361	0.375613	0.0704855	-0.268615	0.204381	0.665969	0.000381829	-0.493525	0.0142542	-0.220034	0.301543	0.150289	0.483331	-0.0234138	0.913524	0.172363	0.420601	0.427451	0.0372083	-0.735779	4.17704e-05	-0.333694	0.111035	0.451106	0.026931	0.0714192	0.740171	0.0919458	0.66916	0.758329	1.75778e-05	-0.638275	0.000790335	-0.713155	9.17042e-05	-0.167649	0.433609	-0.617558	0.00130322	0.677394	0.000276687
XLOC_005487	Bra023715	NA	M1	0.605685	0.00170943	0.55314	0.00505368	0.585353	0.00265669	-0.39357	0.0570702	0.473067	0.0195589	-0.650723	0.000574965	-0.526757	0.00817938	0.613247	0.00143992	-0.0586164	0.785572	0.294052	0.163103	0.645357	0.000660607	-0.811447	1.49838e-06	-0.141854	0.508484	-0.128873	0.548403	-0.0720113	0.73809	-0.684484	0.000224977	0.71294	9.2359e-05	-0.0754786	0.725942	-0.0865131	0.687717	-0.681421	0.000246178	-0.481287	0.0172622	-0.0174767	0.9354
XLOC_005496	Bra020046	AT5G19540	M1	0.429144	0.0363828	0.475632	0.0188169	0.444525	0.0295283	-0.428488	0.0367008	0.493816	0.0141883	-0.450128	0.027305	-0.505442	0.0117519	0.424795	0.0385333	0.119835	0.577018	-0.081637	0.704523	0.779479	7.14704e-06	-0.928221	6.42643e-11	-0.260498	0.218918	0.140748	0.511829	0.365146	0.0793434	-0.380862	0.0663375	0.94956	1.46609e-12	-0.448453	0.0279549	-0.477145	0.0183902	-0.367684	0.0771214	-0.77342	9.3387e-06	0.517598	0.00958414
XLOC_005504	Bra020062	NA	M1	0.317384	0.130728	0.400334	0.0525642	0.392355	0.05791	-0.296526	0.159426	0.431166	0.0354158	-0.190296	0.373109	-0.406126	0.0489295	-0.091329	0.671257	0.0797553	0.711045	-0.161322	0.451405	0.673297	0.00031105	-0.587419	0.00254357	0.0544578	0.800475	0.00325229	0.987967	0.53255	0.00738256	0.180149	0.399588	0.63466	0.000864633	-0.234424	0.270207	-0.728017	5.51775e-05	-0.00240257	0.99111	-0.532533	0.00738485	0.500511	0.0127393
XLOC_005509	Bra020079	NA	M1	0.450939	0.0269943	0.502982	0.0122363	0.472679	0.019673	-0.414405	0.0440785	0.486827	0.0158422	-0.511056	0.0107053	-0.529708	0.00776494	0.516725	0.00972784	-0.0211072	0.922016	-0.0184415	0.931841	0.731943	4.79882e-05	-0.885579	8.85487e-09	-0.217069	0.308269	0.159227	0.457378	0.242622	0.253322	-0.349666	0.0939516	0.878441	1.66454e-08	-0.508256	0.0112173	-0.459867	0.0237608	-0.346765	0.0968995	-0.66359	0.000407614	0.51521	0.00998164
XLOC_005514	Bra020089	AT5G20180	M1	0.425597	0.0381294	0.417658	0.0422792	0.427104	0.0373792	-0.290309	0.168776	0.402427	0.0512274	-0.447576	0.0283005	-0.429511	0.036206	0.374397	0.0714734	0.162116	0.449149	-0.00876115	0.967591	0.692762	0.000175425	-0.87527	2.17606e-08	-0.279359	0.186162	0.129258	0.547199	0.272343	0.197927	-0.394325	0.0565531	0.888914	6.49872e-09	-0.338193	0.106009	-0.38353	0.0643025	-0.439959	0.0314455	-0.735047	4.29e-05	0.405234	0.0494763
XLOC_005571	Bra020209	AT5G22650	M1	0.347144	0.0965102	0.367043	0.0776783	0.360474	0.083558	-0.307959	0.143193	0.408457	0.0475233	-0.413047	0.0448471	-0.418543	0.0417995	0.301095	0.152791	0.227811	0.284341	-0.134434	0.531127	0.694405	0.000166812	-0.932445	3.36415e-11	-0.370951	0.0743325	0.209996	0.324679	0.358304	0.0855717	-0.388032	0.0609772	0.96391	3.94475e-14	-0.369043	0.0759518	-0.446782	0.028616	-0.548019	0.00556551	-0.843703	2.23149e-07	0.420192	0.0409176
XLOC_005579	Bra020234	AT5G60710	M1	0.359096	0.0848327	0.305787	0.146183	0.324983	0.121262	-0.483523	0.0166771	0.515282	0.00996943	-0.410518	0.0463069	-0.167211	0.43483	0.176078	0.4105	0.13833	0.51918	0.159998	0.455176	0.423157	0.039369	-0.722135	6.77226e-05	-0.417456	0.0423892	0.295909	0.160337	0.138724	0.517979	-0.30229	0.151089	0.765092	1.33153e-05	-0.539449	0.00651904	-0.466526	0.0215585	-0.216003	0.31071	-0.676532	0.000283629	0.584238	0.00271944
XLOC_005604	Bra020280	AT5G59850	M1	0.433761	0.0342049	0.424765	0.0385485	0.432221	0.0349195	-0.364081	0.0802897	0.521992	0.00888717	-0.495529	0.0138052	-0.43638	0.0330163	0.380077	0.0669454	0.10182	0.635914	-0.0210899	0.92208	0.699138	0.000144034	-0.949756	1.40581e-12	-0.348359	0.0952711	0.280479	0.18433	0.283596	0.179294	-0.286364	0.174905	0.972377	2.1668e-15	-0.584733	0.0026914	-0.522876	0.0087521	-0.348775	0.09485	-0.801746	2.47885e-06	0.627618	0.00102673
XLOC_005628	Bra020325	NA	M1	0.211333	0.321537	0.157902	0.46118	0.192267	0.368083	-0.328459	0.117102	0.39749	0.0544235	-0.272149	0.198259	-0.0310648	0.885425	0.0869019	0.686383	0.105693	0.623055	0.149405	0.485937	0.176098	0.410445	-0.359406	0.0845446	-0.276832	0.190344	0.179796	0.400527	-0.051411	0.811436	-0.154993	0.469581	0.418957	0.0415765	0.108632	0.613366	-0.370551	0.0746694	-0.473095	0.0195505	-0.355663	0.0880719	0.0234344	0.913448
XLOC_005638	Bra020336	NA	M1	0.547333	0.00563729	0.48527	0.0162313	0.528166	0.00797929	-0.460236	0.0236342	0.516149	0.00982364	-0.615926	0.0013536	-0.448871	0.0277915	0.511815	0.0105699	-0.126961	0.554402	0.298741	0.156185	0.515316	0.00996362	-0.641715	0.000724829	-0.0893631	0.677959	-0.0892119	0.678476	-0.164018	0.443775	-0.464531	0.0222001	0.570086	0.0036323	0.163857	0.444228	-0.214641	0.313845	-0.746229	2.8278e-05	-0.340828	0.103144	-0.180763	0.397956
XLOC_005661	Bra020380	AT5G58220	M1	0.0545217	0.800245	0.144072	0.50181	0.0809938	0.70675	-0.0334182	0.876807	-0.0434019	0.84041	-0.127161	0.553774	-0.235205	0.268569	0.426854	0.037503	-0.0443476	0.836978	-0.050157	0.815958	0.185079	0.386594	-0.205489	0.335407	-0.0398231	0.853424	-0.178214	0.404756	0.0159507	0.94103	-0.571663	0.00351925	0.112333	0.601254	-0.168127	0.432281	0.371798	0.0736219	-0.171508	0.422945	-0.0689464	0.74888	-0.0822393	0.70244
XLOC_005665	Bra020391,Bra020393	NA	M1	0.33967	0.104396	0.429859	0.0360388	0.386604	0.0620173	-0.402897	0.050931	0.390431	0.0592603	-0.216078	0.310536	-0.472838	0.0196261	0.202482	0.342682	-0.0316494	0.883283	-0.0966713	0.653169	0.696048	0.000158574	-0.613158	0.00144288	0.0572802	0.790353	-0.0317342	0.882972	0.490767	0.0148913	-0.0807471	0.707605	0.612914	0.00145096	-0.650086	0.000584607	-0.451004	0.0269697	0.316418	0.131968	-0.474513	0.0191378	0.743841	3.09648e-05
XLOC_005700	Bra020447	AT5G57350	M1	0.184819	0.387273	0.164001	0.443822	0.178679	0.403511	-0.393185	0.057335	0.244965	0.248624	0.00925293	0.965773	-0.0910022	0.67237	-0.165052	0.440866	0.167798	0.433195	0.0911281	0.671941	0.306641	0.145003	-0.178177	0.404855	0.073606	0.732495	-0.233958	0.271189	0.310128	0.140253	-0.132492	0.537132	0.222978	0.294956	0.00422505	0.984368	-0.150104	0.483876	0.230479	0.278584	-0.220699	0.300049	0.230766	0.277968
XLOC_005703	Bra020453,Bra020454	NA	M1	0.164379	0.442759	0.183235	0.391426	0.166975	0.435486	-0.304259	0.148312	0.320808	0.126398	-0.215185	0.312589	-0.205925	0.33436	0.136671	0.524251	0.393093	0.057399	-0.201822	0.34429	0.511858	0.0105624	-0.776991	7.98461e-06	-0.4928	0.0144195	0.261624	0.21686	0.41452	0.0440139	-0.464185	0.0223131	0.848197	1.65502e-07	-0.349865	0.0937525	-0.390665	0.0590945	-0.488343	0.0154706	-0.846694	1.83089e-07	0.386251	0.0622768
XLOC_005705	Bra035650	AT5G57120	M1	0.514274	0.010141	0.5461	0.00576815	0.538483	0.00663465	-0.41659	0.0428631	0.539057	0.00656581	-0.532253	0.00742178	-0.574919	0.00329523	0.401137	0.0520479	0.0202508	0.925171	0.000131414	0.999514	0.804245	2.18321e-06	-0.934226	2.52901e-11	-0.164482	0.442467	0.0638937	0.766766	0.303636	0.149186	-0.305534	0.146534	0.915556	3.61566e-10	-0.387966	0.0610249	-0.502068	0.0124203	-0.404409	0.0499861	-0.706804	0.000112877	0.447033	0.0285158
XLOC_005706	Bra035649	AT5G57110	M1	0.30901	0.141763	0.365794	0.0787713	0.332298	0.11263	-0.32582	0.120251	0.304816	0.147534	-0.33463	0.109975	-0.430726	0.0356247	0.201997	0.343863	0.216709	0.30909	-0.19788	0.353994	0.698957	0.000144852	-0.883898	1.03112e-08	-0.3055	0.146582	0.158658	0.459008	0.444284	0.0296273	-0.382559	0.0650379	0.88955	6.11991e-09	-0.469771	0.0205466	-0.486566	0.0159067	-0.423666	0.0391077	-0.815589	1.19804e-06	0.453553	0.0260131
XLOC_005718	Bra035629	AT5G56710	M1	0.528176	0.00797785	0.521066	0.00903037	0.535214	0.0070385	-0.40962	0.0468336	0.596084	0.00211269	-0.551142	0.00524842	-0.525032	0.00842996	0.402067	0.0514553	-0.0601795	0.77999	0.067976	0.752306	0.74938	2.50489e-05	-0.912513	5.26029e-10	-0.179088	0.402416	0.186636	0.382539	0.248355	0.241927	-0.166925	0.435627	0.899596	2.24959e-09	-0.629918	0.000971129	-0.575741	0.0032406	-0.18173	0.395396	-0.675177	0.000294854	0.676465	0.000284173
XLOC_005719	Bra035628	AT5G56670	M1	0.32402	0.122433	0.31498	0.13383	0.327978	0.117671	-0.320092	0.127295	0.479436	0.0177591	-0.376495	0.069775	-0.350023	0.093594	0.240117	0.258407	0.254003	0.231037	-0.132595	0.536813	0.635244	0.000852241	-0.854303	1.08555e-07	-0.372003	0.0734505	0.232953	0.273312	0.334725	0.109868	-0.311222	0.138786	0.916162	3.34988e-10	-0.193184	0.36576	-0.526815	0.00817106	-0.614532	0.00139794	-0.809947	1.62266e-06	0.315412	0.133269
XLOC_005737	Bra035594	NA	M1	0.494916	0.0139414	0.529841	0.00774663	0.523855	0.0086045	-0.390258	0.0593827	0.512969	0.0103668	-0.514046	0.0101802	-0.552002	0.00516386	0.370863	0.0744066	0.0143654	0.946883	-0.0110237	0.959227	0.791223	4.15335e-06	-0.926373	8.42564e-11	-0.169287	0.429065	0.117638	0.584073	0.311097	0.138953	-0.234855	0.269303	0.922167	1.52172e-10	-0.45842	0.0242627	-0.533336	0.00727958	-0.332587	0.112299	-0.711283	9.75499e-05	0.538461	0.00663726
XLOC_005741	Bra035587	AT5G55710	M1	0.112988	0.599121	-0.027289	0.899277	0.049553	0.818138	-0.0736973	0.732175	0.326323	0.119646	-0.246087	0.246394	0.0643482	0.765153	0.135461	0.527967	0.337231	0.107069	-0.000797691	0.997048	0.14388	0.502386	-0.478186	0.0181012	-0.522178	0.00885862	0.422136	0.0398971	-0.0255867	0.905532	-0.186814	0.38208	0.599737	0.00195065	0.14761	0.491252	-0.331349	0.113724	-0.726987	5.72149e-05	-0.57119	0.00355285	0.00859923	0.96819
XLOC_005754	Bra035565	AT5G55280	M1	-0.258062	0.223413	-0.337924	0.106305	-0.308991	0.141788	-0.013558	0.949864	0.0980998	0.648364	0.102309	0.634285	0.354033	0.0896421	-0.182345	0.39377	0.654666	0.000518324	-0.320847	0.126349	-0.00232653	0.991392	-0.464168	0.0223184	-0.838077	3.20273e-07	0.78179	6.43958e-06	0.331002	0.114126	-0.0118822	0.956055	0.733789	4.49007e-05	-0.429537	0.0361934	-0.301447	0.152287	-0.207842	0.32978	-0.853818	1.12331e-07	0.702403	0.000129947
XLOC_005755	Bra035562	AT5G55190	M1	0.144725	0.499851	0.22108	0.299193	0.185315	0.385977	-0.362298	0.0818932	0.260137	0.21958	-0.0523819	0.80794	-0.134716	0.53026	0.00814142	0.969882	0.213377	0.31677	-0.0360014	0.867363	0.349961	0.0936564	-0.214572	0.314004	0.020695	0.923535	-0.162587	0.447815	0.237365	0.26407	-0.0988007	0.646011	0.336073	0.108357	0.548152	0.00555168	-0.269555	0.202739	-0.326985	0.118853	-0.256575	0.226185	-0.138357	0.519098
XLOC_005780	Bra022716	NA	M1	0.507904	0.011283	0.532093	0.0074429	0.523294	0.00868879	-0.321807	0.125156	0.48059	0.0174478	-0.552047	0.0051595	-0.559124	0.00450617	0.464693	0.0221475	0.0347984	0.871759	-0.00171517	0.993654	0.777219	7.9043e-06	-0.967564	1.24008e-14	-0.234663	0.269706	0.107996	0.615456	0.258827	0.221995	-0.410382	0.0463862	0.926686	8.05211e-11	-0.480285	0.0175298	-0.443909	0.0297815	-0.458023	0.0244018	-0.736609	4.05238e-05	0.44014	0.0313673
XLOC_005823	Bra022647	AT5G53340	M1	0.362984	0.0812727	0.43976	0.0315311	0.398947	0.0534648	-0.284435	0.177956	0.302987	0.150101	-0.373243	0.0724218	-0.423053	0.0394224	0.286362	0.174908	0.0194824	0.928003	-0.0447734	0.835433	0.637354	0.000808723	-0.783286	6.0156e-06	-0.191551	0.369906	0.17151	0.422938	0.316127	0.132343	-0.228249	0.28339	0.766232	1.26948e-05	-0.725932	5.93683e-05	-0.435873	0.033244	-0.038072	0.859806	-0.631959	0.000923984	0.690586	0.000187421
XLOC_005848	Bra022598	AT5G52540	M1	0.198652	0.35208	0.038188	0.859383	0.129284	0.547119	-0.0527783	0.806513	0.122765	0.567671	-0.363801	0.0805396	0.0693636	0.747408	0.348417	0.0952125	0.0214961	0.920584	0.360914	0.0831537	-0.0632771	0.768957	-0.238824	0.261059	-0.329192	0.116239	0.207709	0.330098	-0.46416	0.0223213	-0.363233	0.0810492	0.241361	0.255874	0.128576	0.549333	0.194968	0.361264	-0.552421	0.00512304	-0.140376	0.512957	-0.163762	0.444495
XLOC_005852	Bra022587	AT5G52390	M1	0.0707293	0.742598	0.0759009	0.724466	0.0261024	0.903636	-0.336265	0.108142	-0.0154415	0.94291	-0.186544	0.38278	-0.0508476	0.813467	0.365108	0.0793768	0.234487	0.270076	0.0648066	0.763526	0.15677	0.464439	-0.415215	0.0436248	-0.414577	0.0439815	0.0647943	0.76357	-0.020847	0.922975	-0.778158	7.58132e-06	0.422264	0.0398303	-0.21074	0.322928	0.349911	0.0937056	-0.366503	0.0781491	-0.407238	0.0482551	0.0864953	0.687778
XLOC_005888	Bra022521	AT5G50520	M1	0.220968	0.299444	0.37008	0.0750686	0.274458	0.19433	-0.373394	0.0722971	0.205823	0.334604	-0.241413	0.255768	-0.436964	0.0327559	0.204827	0.337001	0.228076	0.283765	-0.266561	0.207995	0.677656	0.000274611	-0.800678	2.61584e-06	-0.255782	0.227675	0.0474041	0.825904	0.510594	0.0107884	-0.465065	0.022027	0.803543	2.26294e-06	-0.41861	0.0417635	-0.362642	0.0815814	-0.373709	0.0720378	-0.748021	2.6399e-05	0.38303	0.0646804
XLOC_005908	Bra022481	AT1G65410	M1	-0.0143992	0.946758	-0.114081	0.595567	-0.0633701	0.768627	0.184772	0.387395	0.0359512	0.867547	-0.121358	0.57215	0.0714234	0.740156	0.125792	0.558083	0.133354	0.534464	0.0562222	0.794143	-0.0753201	0.726496	-0.0967534	0.652893	-0.202457	0.342742	0.0775347	0.718768	-0.197347	0.355317	-0.173242	0.418199	0.127368	0.553123	0.291639	0.166745	0.272851	0.19706	-0.471891	0.0199066	-0.101291	0.637678	-0.26474	0.211237
XLOC_005917	Bra022469	NA	M1	0.101785	0.636032	-0.0466268	0.828717	0.0511385	0.812418	-0.223044	0.294811	0.276757	0.190469	-0.106327	0.62096	0.177732	0.406048	-0.169208	0.429282	0.0247901	0.908461	0.234551	0.269941	-0.101326	0.637561	-0.0267538	0.901243	-0.156418	0.465457	0.214386	0.314434	-0.134853	0.529836	0.213308	0.31693	0.0953116	0.657755	0.00432835	0.983985	-0.254254	0.23056	0.0188075	0.930492	-0.0818923	0.70364	0.167471	0.434104
XLOC_005920	Bra039740	AT1G65820	M1	-0.0278336	0.897277	0.043238	0.841005	-0.00913582	0.966206	-0.142678	0.506001	0.167122	0.435076	0.0790069	0.713645	0.0565536	0.792956	-0.0268144	0.90102	0.524364	0.00852872	-0.222623	0.295747	0.327955	0.117699	-0.439916	0.031464	-0.39925	0.0532673	0.273851	0.195358	0.484242	0.0164923	-0.107665	0.616547	0.659414	0.000456559	-0.194877	0.361491	-0.255062	0.22903	0.0413276	0.847949	-0.669949	0.000341832	0.598701	0.00199549
XLOC_005963	Bra033999	NA	M1	0.245311	0.247935	0.267356	0.206591	0.264179	0.212242	-0.267439	0.206445	0.414842	0.0438334	-0.278204	0.188065	-0.28635	0.174926	0.135852	0.526764	0.110238	0.608096	-0.135379	0.528217	0.547367	0.00563369	-0.744401	3.0316e-05	-0.302809	0.150352	0.373022	0.0726039	0.39425	0.056604	0.0236432	0.91268	0.813751	1.32392e-06	-0.755094	2.00134e-05	-0.584112	0.00272662	0.0393849	0.855021	-0.707831	0.000109188	0.861377	6.49916e-08
XLOC_005991	Bra033958	NA	M1	0.378812	0.067935	0.435308	0.0334988	0.378753	0.0679807	-0.665677	0.000384909	0.375945	0.0702175	-0.354058	0.0896174	-0.371487	0.0738821	0.422758	0.0395745	0.0474496	0.82574	0.143587	0.503267	0.550522	0.00531012	-0.597948	0.00202865	-0.131549	0.540058	-0.170484	0.425759	0.170019	0.427043	-0.685334	0.000219378	0.572349	0.003471	-0.247756	0.243103	-0.0142208	0.947416	-0.183389	0.391021	-0.440046	0.031408	0.246314	0.245945
XLOC_006007	Bra033929	AT1G68490	M1	0.0202675	0.92511	-0.233407	0.272351	-0.0874439	0.684524	0.226126	0.288015	0.0734012	0.733213	-0.15127	0.480447	0.337749	0.106497	0.0323133	0.880851	0.355205	0.0885111	0.251702	0.235433	-0.170701	0.425163	-0.30136	0.152413	-0.619123	0.00125641	0.442649	0.0303044	-0.207332	0.330995	-0.308452	0.142521	0.380352	0.0667323	-0.324745	0.12155	0.214822	0.313426	-0.228036	0.283853	-0.426779	0.03754	0.307736	0.143499
XLOC_006031	Bra038340	AT1G68890	M1	-0.0696586	0.746368	-0.00893286	0.966956	-0.0392675	0.855449	-0.123527	0.565249	0.184515	0.388069	0.0466551	0.828615	-0.0464079	0.82951	-0.209984	0.324707	0.449543	0.0275305	-0.462344	0.0229212	0.3752	0.0708197	-0.54567	0.00581442	-0.411137	0.0459458	0.446606	0.0286861	0.589087	0.00245527	0.182573	0.393169	0.741806	3.34296e-05	-0.273012	0.196785	-0.638493	0.000786047	-0.180256	0.399304	-0.780254	6.90257e-06	0.600099	0.00193515
XLOC_006044	Bra038318	NA	M1	0.338855	0.105284	0.373277	0.0723932	0.347997	0.0956395	-0.309623	0.140934	0.361303	0.0827978	-0.368238	0.0766429	-0.351563	0.0920607	0.362259	0.0819279	0.210128	0.324369	-0.00498772	0.981546	0.625029	0.00109256	-0.822741	8.03399e-07	-0.330257	0.114992	0.114414	0.594488	0.304626	0.147798	-0.470432	0.0203453	0.852845	1.20261e-07	-0.467973	0.0211024	-0.227423	0.285183	-0.255605	0.228007	-0.727243	5.67034e-05	0.532512	0.00738756
XLOC_006058	Bra007866	NA	M1	-0.0104586	0.961316	-0.126221	0.556733	-0.0670219	0.755678	-0.00799753	0.970414	0.229425	0.280849	-0.172163	0.421149	0.122685	0.567926	-0.00058608	0.997831	0.514178	0.0101574	-0.194105	0.363435	0.193572	0.36478	-0.686447	0.000212237	-0.765313	1.31931e-05	0.697143	0.000153278	0.220959	0.299464	-0.0957724	0.6562	0.873291	2.56279e-08	-0.377141	0.0692579	-0.382977	0.06472	-0.497426	0.0133911	-0.89553	3.41411e-09	0.561429	0.00430906
XLOC_006197	Bra008086	NA	M1	0.0896175	0.67709	0.0814818	0.70506	0.0823027	0.702221	-0.159375	0.456957	0.299579	0.154971	-0.168327	0.431726	-0.0969111	0.652362	0.0801041	0.709835	0.413853	0.0443895	-0.262736	0.214842	0.449807	0.0274283	-0.781292	6.58671e-06	-0.583009	0.00279012	0.540895	0.00634923	0.445248	0.0292336	-0.138671	0.51814	0.929315	5.45587e-11	-0.626116	0.0010645	-0.516619	0.00974551	-0.214114	0.315062	-0.913955	4.41181e-10	0.781229	6.60536e-06
XLOC_006229	Bra008159	AT1G74640	M1	0.396122	0.055336	0.481999	0.0170741	0.435566	0.0333823	-0.519486	0.00927927	0.406605	0.0486379	-0.360923	0.0831453	-0.494189	0.014104	0.417252	0.0425005	0.118913	0.579975	-0.0400361	0.852649	0.736106	4.12754e-05	-0.740974	3.44854e-05	-0.111381	0.604359	-0.11695	0.586288	0.324042	0.122406	-0.541658	0.00626108	0.754031	2.08758e-05	-0.0840874	0.69606	-0.24899	0.240687	-0.414474	0.0440397	-0.585786	0.00263261	0.202575	0.342456
XLOC_006336	Bra008308	AT1G77440	M1	0.206147	0.333829	0.198762	0.351808	0.213144	0.317312	-0.28303	0.180202	0.330609	0.114582	-0.0306645	0.886892	-0.156163	0.466193	0.0126722	0.953136	0.1278	0.551765	0.0202331	0.925237	0.344006	0.0997653	-0.179392	0.401606	0.0996009	0.643329	-0.220326	0.300886	0.268625	0.204363	-0.104497	0.627013	0.232112	0.275098	0.196167	0.35826	-0.219587	0.302551	0.060657	0.778286	-0.190485	0.372626	0.0763217	0.722997
XLOC_006384	Bra008385	AT1G78900	M1	0.327387	0.118374	0.351435	0.0921882	0.328993	0.116473	-0.325525	0.120606	0.340703	0.103278	-0.409574	0.046861	-0.389406	0.0599889	0.383436	0.0643735	0.220596	0.300279	-0.114772	0.593329	0.655466	0.000507427	-0.936225	1.81792e-11	-0.431348	0.0353298	0.254127	0.230801	0.321858	0.125092	-0.502723	0.0122882	0.954444	4.89314e-13	-0.547703	0.00559847	-0.352466	0.0911713	-0.458062	0.0243882	-0.845205	2.02151e-07	0.512958	0.0103687
XLOC_006434	Bra008474	AT1G80410	M1	0.428066	0.0369069	0.472088	0.0198482	0.463263	0.022616	-0.199618	0.349697	0.373047	0.0725833	-0.493526	0.0142538	-0.474163	0.019239	0.425558	0.0381488	0.0225031	0.916876	0.0072858	0.973046	0.620545	0.00121517	-0.776294	8.23421e-06	-0.190136	0.373518	0.0362472	0.866466	0.12194	0.570294	-0.436924	0.0327737	0.727807	5.55876e-05	-0.141711	0.508918	-0.321774	0.125196	-0.668146	0.000359477	-0.565125	0.00400816	0.0811729	0.70613
XLOC_006450	Bra008506	NA	M1	0.505178	0.0118032	0.458654	0.0241809	0.489172	0.0152704	-0.301911	0.151626	0.470234	0.0204056	-0.624507	0.00110627	-0.494829	0.0139607	0.512748	0.0104055	-0.0283697	0.895309	0.0940851	0.661903	0.6633	0.000410861	-0.970292	4.77813e-15	-0.32976	0.115572	0.235621	0.2677	0.0916179	0.670274	-0.431967	0.0350384	0.909998	7.09887e-10	-0.621759	0.00118085	-0.365633	0.0789132	-0.488626	0.015402	-0.709886	0.000102121	0.480561	0.0174557
XLOC_006453	Bra008509	NA	M1	0.206844	0.332161	0.308198	0.142867	0.268299	0.204934	-0.223673	0.293416	0.289626	0.169827	-0.116239	0.588582	-0.258979	0.221713	-0.000798762	0.997044	0.211761	0.320536	-0.121926	0.570341	0.519931	0.00920857	-0.428327	0.0367796	0.00509124	0.981163	-0.060922	0.777341	0.39331	0.0572492	0.0500788	0.81624	0.548185	0.00554821	0.198559	0.352311	-0.379445	0.0674388	-0.179532	0.401231	-0.434445	0.0338912	0.221171	0.298989
XLOC_006467	Bra008530	AT4G00755	M1	-0.228423	0.283014	-0.157498	0.462342	-0.20519	0.336128	-0.0677733	0.753022	-0.0454448	0.832999	0.176579	0.409148	0.108454	0.613951	-0.196002	0.358672	0.669778	0.000343468	-0.46688	0.0214462	0.194665	0.362025	-0.436194	0.0330995	-0.567609	0.00381611	0.28217	0.181586	0.523423	0.00866943	-0.37832	0.0683224	0.603617	0.00179024	-0.00713923	0.973588	-0.16778	0.433245	-0.500535	0.0127343	-0.763945	1.39661e-05	0.163276	0.445868
XLOC_006494	Bra033124	AT4G12040	M1	0.105335	0.624239	0.0240314	0.911251	0.113291	0.598136	-0.0818285	0.703861	0.182229	0.394077	-0.0389927	0.85645	0.0307607	0.886539	-0.150454	0.482846	0.0940573	0.661997	0.136003	0.5263	0.116646	0.587268	-0.0771194	0.720215	0.0241352	0.91087	-0.0211817	0.921742	0.0613794	0.775711	0.137368	0.522119	0.160228	0.45452	0.196142	0.358322	-0.174155	0.415712	0.0193653	0.928435	-0.109216	0.611448	0.112982	0.59914
XLOC_006507	Bra033145	AT4G11420	M1	0.595174	0.00215483	0.629119	0.00099014	0.637098	0.000813894	-0.381209	0.0660702	0.598424	0.00200764	-0.590983	0.00235807	-0.657078	0.000486103	0.415354	0.0435473	-0.154768	0.470234	0.0590499	0.784023	0.835539	3.75311e-07	-0.894826	3.66346e-09	-0.0143136	0.947074	0.0187228	0.930804	0.254028	0.23099	-0.176832	0.408467	0.830212	5.19105e-07	-0.438649	0.0320131	-0.621781	0.00118025	-0.327282	0.118499	-0.579386	0.00300751	0.444301	0.0296202
XLOC_006509	Bra033146	NA	M1	-0.181871	0.395023	-0.130338	0.543828	-0.18044	0.398814	0.0307804	0.886467	-0.0273623	0.899008	0.071567	0.739651	0.0418269	0.846133	-0.00570141	0.978906	0.636208	0.000832106	-0.504714	0.0118935	0.303394	0.149527	-0.629238	0.00098729	-0.663846	0.000404778	0.536011	0.00693816	0.53299	0.00732473	-0.211374	0.321442	0.829629	5.37505e-07	-0.375865	0.070282	-0.265914	0.209143	-0.34489	0.0988399	-0.912434	5.31072e-10	0.562225	0.00424272
XLOC_006520	Bra033163	AT4G11010	M1	0.247675	0.243261	0.247884	0.24285	0.229745	0.280159	-0.327966	0.117686	0.410755	0.0461684	-0.304323	0.148222	-0.200962	0.346393	0.351564	0.0920597	0.276495	0.190905	-0.03243	0.880424	0.508052	0.0112554	-0.76037	1.61799e-05	-0.45347	0.0260437	0.310573	0.139655	0.275102	0.193242	-0.375551	0.0705354	0.864355	5.19286e-08	-0.486822	0.0158432	-0.275171	0.193126	-0.205352	0.335738	-0.754179	2.07535e-05	0.629056	0.000991662
XLOC_006527	Bra033172	AT4G10440	M1	0.13023	0.544164	0.079118	0.713259	0.104171	0.628096	-0.178765	0.40328	0.354725	0.0889729	-0.273781	0.195476	-0.085078	0.692649	0.135944	0.526481	0.382205	0.0653073	-0.184265	0.388723	0.403517	0.0505419	-0.808173	1.78146e-06	-0.640384	0.000749588	0.587547	0.00253673	0.294443	0.162517	-0.146942	0.493236	0.955714	3.60602e-13	-0.478224	0.0180907	-0.506358	0.0115756	-0.444492	0.0295419	-0.908228	8.72083e-10	0.637412	0.000807552
XLOC_006572	Bra021981	NA	M1	0.203747	0.339611	0.282156	0.181609	0.218368	0.305312	-0.389521	0.0599067	0.353118	0.0905323	-0.191266	0.370632	-0.298136	0.157065	0.169706	0.427906	0.382088	0.0653966	-0.259364	0.221003	0.644753	0.000670915	-0.786609	5.16104e-06	-0.365238	0.0792615	0.178181	0.404842	0.543363	0.00606789	-0.32828	0.117314	0.896316	3.15395e-09	-0.293311	0.164215	-0.443041	0.0301407	-0.315513	0.133138	-0.842467	2.41881e-07	0.493903	0.0141685
XLOC_006670	Bra022133	AT5G47460	M1	0.391462	0.0585341	0.356304	0.0874601	0.389872	0.0596571	-0.26925	0.203271	0.427271	0.037297	-0.378173	0.0684385	-0.311184	0.138836	0.27286	0.197043	0.0987578	0.646155	0.0933346	0.664445	0.576007	0.00322308	-0.753418	2.1388e-05	-0.255306	0.228571	0.190315	0.373059	0.251511	0.235802	-0.256603	0.226133	0.77084	1.04396e-05	-0.628714	0.000999909	-0.367844	0.076983	-0.0323238	0.880813	-0.635039	0.00085657	0.687794	0.000203863
XLOC_006676	Bra022147	AT5G47640	M1	0.142523	0.506469	0.205851	0.334539	0.175176	0.412941	-0.276813	0.190375	0.399335	0.0532115	0.0210282	0.922307	-0.172374	0.42057	-0.0952998	0.657795	0.188495	0.377732	-0.200858	0.346648	0.477179	0.0183808	-0.367385	0.0773813	-0.0197816	0.926901	0.121847	0.570591	0.539656	0.00649452	0.244001	0.250551	0.501865	0.0124617	-0.27041	0.201256	-0.684189	0.000226948	0.294568	0.162331	-0.455916	0.025151	0.626421	0.00105674
XLOC_006728	Bra026573	AT2G02910	M1	-0.0784587	0.715551	0.139158	0.516657	-0.0025481	0.990572	-0.399718	0.0529624	0.0420431	0.845347	0.0866414	0.687276	-0.193076	0.366034	-0.114008	0.595805	0.390639	0.0591133	-0.462511	0.0228655	0.444324	0.0296106	-0.42313	0.039383	-0.191599	0.369784	0.0173679	0.935801	0.609025	0.0015855	-0.163762	0.444496	0.554742	0.00490191	0.096783	0.652793	-0.343942	0.0998325	-0.306042	0.145829	-0.589466	0.00243561	0.166319	0.437317
XLOC_006768	Bra026642	AT2G01670	M1	0.333688	0.111042	0.440702	0.031127	0.370962	0.0743231	-0.385604	0.0627539	0.313488	0.135782	-0.274209	0.194751	-0.387266	0.0615332	0.262414	0.215427	0.244921	0.248711	-0.075383	0.726276	0.68818	0.000201518	-0.750505	2.39776e-05	-0.198181	0.353247	-0.0372443	0.862826	0.434157	0.0340231	-0.447897	0.0281735	0.791768	4.04664e-06	-0.283879	0.178843	-0.263946	0.21266	-0.209598	0.325618	-0.685517	0.00021819	0.433071	0.0345238
XLOC_006851	Bra033012	AT3G27460	M1	0.438261	0.0321832	0.467637	0.0212076	0.446282	0.0288159	-0.373323	0.0723554	0.470627	0.0202864	-0.505212	0.0117965	-0.486701	0.0158733	0.427982	0.0369477	0.0958011	0.656103	-0.0419678	0.845621	0.730138	5.11847e-05	-0.96291	5.30275e-14	-0.323113	0.123544	0.20384	0.339385	0.286838	0.174159	-0.396945	0.0547861	0.95921	1.48372e-13	-0.542565	0.00615767	-0.452632	0.0263557	-0.421646	0.0401523	-0.790185	4.36337e-06	0.528469	0.00793673
XLOC_006853	Bra033007	AT3G27390	M1	0.188502	0.377714	0.305487	0.146599	0.234963	0.269077	-0.238657	0.2614	0.223991	0.292712	-0.123896	0.564079	-0.396863	0.0548404	0.125967	0.557533	0.331017	0.114108	-0.361802	0.0823435	0.713867	8.95633e-05	-0.735005	4.29656e-05	-0.196066	0.358512	0.0590724	0.783942	0.631261	0.000939891	-0.264963	0.210838	0.802701	2.36191e-06	-0.283338	0.179708	-0.450595	0.0271258	-0.241519	0.255553	-0.759541	1.67358e-05	0.439706	0.0315543
XLOC_006890	Bra032947	AT3G26744	M1	0.0940321	0.662082	0.0903278	0.674668	0.117504	0.584503	0.0201556	0.925522	0.293666	0.163681	-0.00415079	0.984642	-0.0516906	0.810429	-0.154368	0.471397	0.147375	0.49195	-0.110885	0.605981	0.3018	0.151784	-0.321034	0.126116	-0.0963942	0.654103	0.262333	0.215573	0.398121	0.0540071	0.400219	0.0526386	0.443257	0.0300509	-0.491732	0.0146657	-0.486152	0.0160097	0.43455	0.0338433	-0.399703	0.0529725	0.790044	4.39257e-06
XLOC_006899	Bra032929	AT3G26350	M1	0.232533	0.274203	0.269249	0.203272	0.250159	0.238414	-0.12933	0.546976	0.277905	0.188559	-0.348906	0.0947178	-0.249323	0.240038	0.27134	0.199649	0.241873	0.254836	-0.110771	0.606352	0.512503	0.0104484	-0.7931	3.79618e-06	-0.429214	0.0363492	0.360733	0.0833201	0.24611	0.24635	-0.236813	0.265215	0.873913	2.43499e-08	-0.415738	0.0433339	-0.369482	0.0755772	-0.409288	0.0470301	-0.758477	1.74733e-05	0.523618	0.00864017
XLOC_006936	Bra020760	AT3G06300	M1	0.0666389	0.757033	-0.152026	0.478229	-0.0292208	0.892186	0.162112	0.449162	0.058225	0.786972	-0.195932	0.358848	0.307488	0.143839	0.0056549	0.979078	0.342253	0.101619	0.275986	0.191758	-0.16009	0.454912	-0.277744	0.188827	-0.553859	0.00498509	0.387	0.0617276	-0.273562	0.195848	-0.215254	0.31243	0.370399	0.074798	-0.00490682	0.981846	0.144373	0.500907	-0.417393	0.0424232	-0.386239	0.0622849	0.100978	0.638723
XLOC_006939	Bra020753,Bra020754	NA	M1	-0.0187785	0.930599	-0.0206581	0.923671	-0.0169283	0.937423	-0.131956	0.538793	0.2203	0.300945	-0.0202588	0.925142	0.0489243	0.820408	-0.0579913	0.787808	0.598741	0.00199375	-0.285439	0.176363	0.328882	0.116604	-0.590517	0.00238166	-0.575607	0.00324945	0.380237	0.0668211	0.430215	0.035868	-0.21164	0.320818	0.800087	2.69443e-06	-0.0345553	0.872648	-0.343477	0.100322	-0.452837	0.026279	-0.839632	2.90228e-07	0.370781	0.074476
XLOC_006940	Bra020751	NA	M1	0.189723	0.374575	0.295764	0.160552	0.233945	0.271216	-0.294549	0.16236	0.337455	0.106821	-0.321197	0.125913	-0.272845	0.19707	0.386771	0.0618948	0.0940538	0.662009	-0.0867119	0.687035	0.42973	0.0361003	-0.594466	0.00218806	-0.292821	0.164954	0.185907	0.384436	0.152613	0.476514	-0.296944	0.15881	0.662521	0.000419698	-0.150757	0.481954	-0.222124	0.296859	-0.449615	0.0275026	-0.510218	0.0108565	0.255492	0.22822
XLOC_006959	Bra020724	AT5G47910	M1	0.172415	0.420459	0.29109	0.167581	0.212232	0.319435	-0.365954	0.0786306	0.279333	0.186205	-0.180376	0.398984	-0.334448	0.110181	0.172085	0.421361	0.398104	0.0540183	-0.325818	0.120253	0.670864	0.000333166	-0.819611	9.58956e-07	-0.380238	0.0668206	0.147861	0.490506	0.57927	0.00301472	-0.448901	0.0277798	0.907015	1.00182e-09	-0.302588	0.150666	-0.409929	0.0466518	-0.423764	0.0390575	-0.872081	2.8284e-08	0.425594	0.0381307
XLOC_007004	Bra020653	NA	M1	0.694561	0.000166013	0.683497	0.000231629	0.696876	0.000154555	-0.399238	0.0532747	0.64271	0.000706769	-0.639756	0.000761529	-0.653787	0.000530513	0.60355	0.00179289	-0.254285	0.230501	0.282341	0.18131	0.763937	1.39712e-05	-0.68736	0.00020653	0.181245	0.39668	-0.22641	0.287392	0.00559727	0.979291	-0.244979	0.248595	0.605569	0.00171387	0.0270852	0.900025	-0.39621	0.055277	-0.383571	0.0642715	-0.284787	0.177396	0.0591992	0.783489
XLOC_007025	Bra020605,Bra020606	NA	M1	0.326065	0.119955	0.335099	0.109447	0.332787	0.11207	-0.241361	0.255873	0.414017	0.0442972	-0.387588	0.0612991	-0.359362	0.0845858	0.249013	0.240643	0.129762	0.545625	-0.108718	0.613082	0.619047	0.00125867	-0.868772	3.68635e-08	-0.350263	0.0933534	0.353033	0.0906157	0.343788	0.0999943	-0.117302	0.585155	0.911175	6.17677e-10	-0.69061	0.000187286	-0.543265	0.00607888	-0.183353	0.391117	-0.782394	6.26523e-06	0.749109	2.53135e-05
XLOC_007033	Bra020592,Bra020595,Bra020596	NA	M1	0.0296284	0.890691	0.059811	0.781305	0.0235985	0.912844	-0.0166281	0.93853	0.0402838	0.851747	-0.0822573	0.702378	-0.12368	0.564765	0.280853	0.183721	0.367029	0.0776907	-0.225496	0.289394	0.36983	0.0752803	-0.605193	0.00172839	-0.450431	0.0271887	0.265503	0.209875	0.356878	0.0869154	-0.445118	0.0292866	0.682965	0.000235281	-0.551088	0.0052538	0.000282777	0.998954	-0.112561	0.600511	-0.675866	0.000289096	0.558119	0.0045945
XLOC_007038	Bra020586,Bra020587	NA	M1	0.218045	0.306045	0.277715	0.188875	0.248321	0.241995	-0.267312	0.206668	0.330543	0.114659	-0.306743	0.144861	-0.366925	0.077781	0.224782	0.290965	0.23554	0.267867	-0.281387	0.182854	0.609844	0.00155631	-0.792226	3.95895e-06	-0.337789	0.106453	0.255082	0.228993	0.377124	0.0692714	-0.22045	0.300608	0.862364	6.03707e-08	-0.151715	0.479142	-0.530327	0.00768032	-0.639781	0.000761051	-0.765088	1.33175e-05	0.268704	0.204225
XLOC_007047	Bra020572	AT5G27850	M1	0.00693025	0.974361	-0.0505136	0.814672	-0.0140188	0.948162	-0.084449	0.694814	0.280585	0.184156	-0.143077	0.504801	0.0445759	0.83615	0.00206081	0.992375	0.505573	0.0117266	-0.246387	0.245801	0.283953	0.178724	-0.649562	0.000592639	-0.643912	0.000685482	0.559762	0.00445093	0.293353	0.164152	-0.089244	0.678366	0.848277	1.64612e-07	-0.119072	0.579464	-0.450857	0.0270258	-0.582898	0.00279656	-0.849435	1.52164e-07	0.395285	0.0559002
XLOC_007061	Bra020523,Bra020538	NA	M1	0.14658	0.494314	0.153324	0.474437	0.163514	0.445196	0.188156	0.378607	0.0769106	0.720943	-0.320629	0.126622	-0.28419	0.178346	0.245527	0.247505	-0.1816	0.395738	-0.0976908	0.649738	0.202539	0.342544	-0.400535	0.0524344	-0.111864	0.602784	0.258353	0.222873	-0.0618994	0.773859	0.0902596	0.6749	0.317395	0.130713	-0.327577	0.118148	-0.264091	0.212401	-0.404363	0.0500146	-0.216751	0.308995	0.0979359	0.648915
XLOC_007063	Bra020544	AT5G26180	M1	0.320764	0.126453	0.288174	0.172073	0.301652	0.151995	-0.281247	0.18308	0.395689	0.0556273	-0.412396	0.0452194	-0.344686	0.0990527	0.294505	0.162425	0.246072	0.246425	-0.111526	0.603885	0.613863	0.00141967	-0.934216	2.53275e-11	-0.464137	0.0223288	0.320066	0.127328	0.306657	0.14498	-0.389866	0.0596614	0.967747	1.16611e-14	-0.493907	0.0141676	-0.433981	0.0341036	-0.525257	0.00839684	-0.871048	3.07478e-08	0.491226	0.0147838
XLOC_007064	Bra020541,Bra020542	NA	M1	0.265113	0.210571	0.224876	0.290759	0.246805	0.244974	-0.187846	0.379407	0.401396	0.0518825	-0.398925	0.0534792	-0.25319	0.232584	0.28091	0.183628	0.226596	0.286987	-0.118828	0.580246	0.520722	0.00908418	-0.891551	5.05341e-09	-0.530161	0.00770296	0.490181	0.0150297	0.254725	0.229667	-0.233838	0.271442	0.957269	2.45169e-13	-0.614872	0.00138703	-0.504557	0.0119242	-0.431815	0.0351101	-0.859372	7.53757e-08	0.632822	0.000904654
XLOC_007066	Bra020537,Bra020538	NA	M1	-0.194675	0.362	-0.321066	0.126077	-0.26823	0.205055	0.194567	0.362271	-0.0222841	0.917682	-0.00554146	0.979498	0.356062	0.0876904	-0.106863	0.619191	0.672504	0.000318112	-0.223198	0.294468	-0.0475434	0.8254	-0.529653	0.00777257	-0.908666	8.29149e-10	0.763602	1.41661e-05	0.169378	0.428814	-0.212389	0.31907	0.730631	5.02935e-05	-0.390706	0.0590657	-0.162012	0.449446	-0.472598	0.0196969	-0.866216	4.50157e-08	0.494539	0.0140254
XLOC_007067	Bra020536	AT5G26667	M1	0.210461	0.323584	0.209354	0.326195	0.201166	0.345895	-0.0317227	0.883014	0.161545	0.450771	-0.197172	0.355753	-0.242563	0.253442	0.159464	0.456702	0.0603199	0.779489	-0.0676172	0.753574	0.397362	0.0545088	-0.549261	0.00543758	-0.181634	0.39565	0.206193	0.333718	0.273477	0.195993	-0.102485	0.6337	0.522489	0.00881094	-0.785015	5.55649e-06	-0.280022	0.185077	0.191928	0.368946	-0.482253	0.0170073	0.678919	0.000264766
XLOC_007090	Bra020508	AT5G25610	M1	0.624723	0.00110058	0.555885	0.00479602	0.617832	0.00129492	-0.239152	0.260384	0.602523	0.00183428	-0.686064	0.000214669	-0.495496	0.0138125	0.491414	0.0147399	-0.171509	0.422941	0.281504	0.182663	0.644405	0.0006769	-0.879534	1.51513e-08	-0.175638	0.411688	0.16823	0.431993	-0.0120777	0.955333	-0.256117	0.227044	0.797029	3.13557e-06	-0.617023	0.00131955	-0.448194	0.0280567	-0.29715	0.158508	-0.548845	0.00548015	0.518681	0.00940832
XLOC_007139	Bra029392,Bra029393	NA	M1	0.134515	0.530877	0.122629	0.568103	0.109948	0.609046	-0.129372	0.546843	-0.0562123	0.794179	-0.163304	0.445787	-0.111969	0.602441	0.352185	0.0914476	0.149689	0.4851	0.127084	0.554014	0.182311	0.393861	-0.333125	0.111683	-0.213928	0.315492	-0.116139	0.588905	-0.0183001	0.932363	-0.646785	0.000636814	0.304518	0.14795	-0.193645	0.364595	0.513524	0.0102703	-0.112698	0.600064	-0.259195	0.221314	0.117345	0.585013
XLOC_007156	Bra029370,Bra029371	NA	M1	0.104891	0.625707	-0.0839853	0.696412	0.0245639	0.909293	-0.0868135	0.686686	0.384073	0.0638938	-0.307931	0.143232	0.114244	0.595038	0.142438	0.506723	0.331817	0.113184	0.00533457	0.980263	0.133742	0.533264	-0.670459	0.000336979	-0.75927	1.69204e-05	0.723616	6.43488e-05	0.0103617	0.961674	-0.14036	0.513006	0.807091	1.88495e-06	-0.490412	0.014975	-0.388571	0.0605883	-0.469563	0.0206104	-0.784415	5.7122e-06	0.564971	0.00402037
XLOC_007176	Bra029328,Bra029329	NA	M1	0.396354	0.0551805	0.524548	0.00850136	0.438426	0.0321107	-0.262651	0.214997	0.084877	0.69334	-0.384898	0.0632777	-0.573251	0.00340839	0.519757	0.00923617	-0.00825692	0.969455	0.0306598	0.886909	0.640912	0.000739677	-0.639451	0.000767392	0.0316128	0.883417	-0.377076	0.0693103	0.166112	0.437896	-0.758249	1.7635e-05	0.508629	0.011148	-0.124124	0.563356	0.230679	0.278156	-0.40069	0.052335	-0.361888	0.0822648	-0.0406379	0.850458
XLOC_007186	Bra029311	NA	M1	0.425564	0.0381458	0.107246	0.617925	0.296379	0.159643	0.159438	0.456775	0.342374	0.10149	-0.624988	0.00109362	0.0108471	0.95988	0.447248	0.0284305	-0.11855	0.581139	0.586741	0.00258025	-0.0432104	0.841106	-0.433085	0.0345172	-0.40073	0.0523088	0.329513	0.115862	-0.648044	0.000616444	-0.321983	0.124937	0.343259	0.100551	-0.193146	0.365856	0.0762878	0.723116	-0.608802	0.00159353	-0.199027	0.351154	-0.0482132	0.822978
XLOC_007189	Bra029308,Bra029309	NA	M1	0.226333	0.287561	0.163737	0.444566	0.193395	0.365228	-0.18663	0.382556	0.345837	0.0978558	-0.317078	0.131119	-0.177331	0.407124	0.33047	0.114744	0.289869	0.169452	-0.0631397	0.769446	0.467426	0.0212738	-0.809498	1.66161e-06	-0.540915	0.00634689	0.410386	0.0463839	0.243302	0.251952	-0.385116	0.0631155	0.88852	6.74437e-09	-0.62433	0.00111094	-0.268122	0.205245	-0.261977	0.21622	-0.809226	1.68563e-06	0.666743	0.000373746
XLOC_007204	Bra029279	NA	M1	0.311771	0.138054	0.213927	0.315494	0.269563	0.202726	-0.232712	0.273823	0.312976	0.136457	-0.283775	0.179009	-0.133136	0.535138	0.0800632	0.709977	-0.121724	0.570982	0.265553	0.209785	0.234215	0.270648	-0.325297	0.120882	-0.0285354	0.894701	0.123679	0.564769	-0.00816786	0.969785	0.157107	0.463468	0.325677	0.120423	-0.494605	0.0140108	-0.241736	0.255112	0.327146	0.11866	-0.192493	0.367511	0.594756	0.00217441
XLOC_007218	Bra029256	AT5G62490	M1	-0.114104	0.595493	-0.171126	0.423993	-0.150648	0.482273	0.00348675	0.987099	0.139218	0.516477	-0.0489677	0.820252	0.141116	0.510716	-0.0451137	0.834199	0.611236	0.00150777	-0.321514	0.125519	0.203222	0.340882	-0.669978	0.000341555	-0.791321	4.13397e-06	0.663804	0.000405242	0.366961	0.0777495	-0.193689	0.364485	0.869516	3.47533e-08	-0.43397	0.0341086	-0.307767	0.143456	-0.434409	0.0339076	-0.944578	4.03658e-12	0.595685	0.00213106
XLOC_007224	Bra029251	NA	M1	0.382072	0.0654087	0.504123	0.0120097	0.435298	0.0335033	-0.422183	0.0398725	0.391373	0.0585966	-0.353887	0.0897841	-0.559498	0.00447373	0.329392	0.116004	0.161217	0.451701	-0.197756	0.354303	0.839272	2.96953e-07	-0.891955	4.85917e-09	-0.163126	0.44629	0.00616406	0.977195	0.506809	0.0114897	-0.395307	0.0558853	0.903595	1.46645e-09	-0.348098	0.0955365	-0.473907	0.0193133	-0.360719	0.0833323	-0.761684	1.53327e-05	0.429678	0.0361253
XLOC_007251	Bra029200	NA	M1	0.183662	0.390303	0.24206	0.254458	0.221413	0.298448	-0.219414	0.302942	0.245517	0.247525	-0.122638	0.568073	-0.318077	0.129842	0.0405441	0.8508	0.386541	0.0620634	-0.315609	0.133013	0.656668	0.000491448	-0.750485	2.39962e-05	-0.280899	0.183645	0.108394	0.614146	0.604092	0.00177138	-0.308252	0.142793	0.824021	7.46542e-07	-0.292234	0.165842	-0.43749	0.0325227	-0.302778	0.150397	-0.808521	1.74928e-06	0.437747	0.0324091
XLOC_007263	Bra032009	AT3G03200	M1	0.453267	0.0261192	0.359994	0.0840006	0.397789	0.0542259	-0.0694875	0.746971	0.360483	0.0835492	-0.650754	0.000574497	-0.392698	0.0576724	0.754146	2.07812e-05	-0.261968	0.216235	0.284018	0.178621	0.362163	0.0820151	-0.67502	0.000296177	-0.235818	0.267287	0.226678	0.286807	-0.294531	0.162387	-0.377872	0.0686764	0.562848	0.00419138	-0.574707	0.00330941	-0.00994805	0.963203	-0.379617	0.0673044	-0.311982	0.137773	0.293714	0.16361
XLOC_007270	Bra031994	AT3G03380	M1	0.0734505	0.73304	0.186365	0.383244	0.122463	0.56863	-0.320907	0.126275	0.221887	0.297387	0.028675	0.894189	-0.303122	0.149911	0.0492899	0.819088	0.174393	0.415066	-0.31117	0.138854	0.533555	0.00725112	-0.417934	0.0421288	-0.0172532	0.936224	-0.0314285	0.884092	0.592734	0.00227126	-0.140782	0.511726	0.477006	0.0184291	-0.368389	0.0765129	-0.307502	0.143818	0.182129	0.39434	-0.453426	0.0260602	0.497374	0.0134022
XLOC_007284	Bra031967	AT3G03880	M1	-0.00308242	0.988595	0.152821	0.475904	0.0528936	0.806098	-0.312066	0.137662	0.114344	0.594714	0.0185946	0.931277	-0.21964	0.302432	-0.00529598	0.980406	0.521633	0.00894237	-0.485232	0.0162408	0.559298	0.00449108	-0.661923	0.000426585	-0.38712	0.0616398	0.131977	0.538729	0.672147	0.000321341	-0.391918	0.0582146	0.789434	4.52109e-06	-0.104291	0.627698	-0.381412	0.0659139	-0.445163	0.0292679	-0.841555	2.56573e-07	0.290504	0.168478
XLOC_007285	Bra031966	AT3G03890	M1	-0.0557343	0.795893	0.102674	0.633069	0.000870053	0.996781	-0.189038	0.376335	0.105088	0.625054	0.109635	0.610072	-0.171462	0.423071	-0.080897	0.707086	0.447566	0.0283044	-0.468767	0.0208555	0.495229	0.0138716	-0.539617	0.00649915	-0.284851	0.177296	0.15876	0.458717	0.709447	0.000103595	-0.169225	0.429237	0.661533	0.000431124	-0.394961	0.05612	-0.371076	0.0742273	0.0123023	0.954503	-0.726121	5.89779e-05	0.56845	0.0037528
XLOC_007318	Bra031908	AT5G64690	M1	-0.19691	0.356406	-0.105988	0.622078	-0.163387	0.445554	0.0863618	0.688236	-0.136926	0.523471	0.124714	0.561491	0.0580169	0.787716	-0.176174	0.410241	0.656057	0.000499524	-0.486064	0.0160317	0.25137	0.236074	-0.478946	0.0178926	-0.524719	0.00847607	0.327008	0.118826	0.503646	0.0121039	-0.201339	0.345471	0.65685	0.000489074	0.040587	0.850644	-0.2135	0.316484	-0.528459	0.00793811	-0.773625	9.25555e-06	0.191528	0.369963
XLOC_007332	Bra031892	AT5G64960	M1	0.0609635	0.777193	0.180866	0.397685	0.0998454	0.642511	-0.3318	0.113203	0.236128	0.266641	-0.0986441	0.646537	-0.237045	0.264733	0.0393091	0.855297	0.419522	0.041274	-0.415902	0.0432429	0.565396	0.00398686	-0.763536	1.42051e-05	-0.448851	0.0277993	0.289131	0.17059	0.609248	0.00157752	-0.308284	0.14275	0.871435	2.98026e-08	-0.423827	0.0390254	-0.492208	0.0145555	-0.34435	0.0994039	-0.888313	6.87604e-09	0.527722	0.00804191
XLOC_007396	Bra031806,Bra031807	NA	M1	0.218316	0.305429	0.121558	0.571514	0.182816	0.39253	-0.289333	0.170278	0.500212	0.0128013	-0.131489	0.540246	0.0736176	0.732454	0.0187282	0.930784	0.0876091	0.683959	0.265747	0.20944	0.168494	0.431262	-0.200693	0.347053	-0.119655	0.577596	0.159664	0.456129	0.0707208	0.742627	0.165554	0.439459	0.343884	0.0998929	-0.204489	0.337815	-0.284517	0.177826	0.373517	0.0721955	-0.233184	0.272822	0.594372	0.00219254
XLOC_007439	Bra028475	AT5G40770	M1	-0.00902591	0.966612	-0.113064	0.598874	-0.0612541	0.776158	-0.163383	0.445565	0.260297	0.219286	-0.163705	0.444658	0.185509	0.385472	-0.0175496	0.935131	0.488928	0.0153291	-0.103976	0.628741	0.130993	0.541787	-0.628015	0.00101694	-0.785445	5.44717e-06	0.685841	0.000216102	0.172296	0.420785	-0.170954	0.424465	0.819387	9.71028e-07	-0.420805	0.0405934	-0.352048	0.0915822	-0.409423	0.0469501	-0.851277	1.34095e-07	0.601268	0.00188595
XLOC_007449	Bra028498	NA	M1	0.391444	0.0585462	0.33545	0.109053	0.375497	0.0705792	-0.27282	0.197112	0.4868	0.0158488	-0.466798	0.0214722	-0.398379	0.0538369	0.321082	0.126056	0.134337	0.531429	-0.0582294	0.786956	0.652366	0.000550748	-0.93977	9.85417e-12	-0.385081	0.0631417	0.33402	0.110666	0.279736	0.185545	-0.248667	0.241317	0.959267	1.46131e-13	-0.584253	0.0027186	-0.532264	0.00742036	-0.402471	0.0511994	-0.819847	9.46333e-07	0.595613	0.00213439
XLOC_007457	Bra028511	AT5G41870	M1	-0.11614	0.588901	0.0341542	0.874114	-0.0645194	0.764545	-0.0545401	0.800179	0.10336	0.630789	0.0760354	0.723997	-0.0126335	0.953279	-0.161282	0.451518	0.518573	0.00942578	-0.504165	0.0120014	0.354583	0.0891097	-0.543851	0.00601352	-0.481328	0.0172513	0.450142	0.0272994	0.601014	0.00189654	0.0289577	0.893151	0.73309	4.60491e-05	-0.276936	0.190169	-0.60104	0.00189547	-0.268427	0.204709	-0.806621	1.93153e-06	0.517075	0.00967011
XLOC_007477	Bra028543	AT3G52930	M1	0.380069	0.0669517	0.328822	0.116674	0.346364	0.0973118	-0.264715	0.211282	0.371577	0.0738066	-0.507726	0.0113164	-0.310563	0.139668	0.524138	0.00856232	-0.139379	0.515986	0.174428	0.414969	0.408515	0.047489	-0.701794	0.00013248	-0.307476	0.143855	0.336007	0.10843	-0.0474	0.825919	-0.271029	0.200186	0.660921	0.000438344	-0.842001	2.49295e-07	-0.235688	0.26756	-0.0522405	0.808448	-0.476773	0.0184945	0.686338	0.000212928
XLOC_007479	Bra028546	AT3G53020	M1	0.351324	0.0922979	0.319927	0.127502	0.34046	0.103541	-0.285111	0.176882	0.47641	0.0185967	-0.445007	0.0293316	-0.338353	0.105833	0.320172	0.127195	0.17588	0.411034	-0.0664785	0.757601	0.617138	0.00131604	-0.923355	1.29218e-10	-0.440764	0.0311005	0.390374	0.0593002	0.276354	0.191142	-0.233959	0.271187	0.980431	5.07324e-17	-0.576173	0.0032122	-0.524585	0.00849597	-0.383408	0.0643945	-0.840307	2.7799e-07	0.646257	0.00064553
XLOC_007483	Bra028554	AT5G11060	M1	0.274179	0.194802	0.342303	0.101565	0.304027	0.148638	-0.265096	0.210601	0.315996	0.132512	-0.273003	0.1968	-0.389345	0.0600331	0.233844	0.271429	0.315587	0.133041	-0.236352	0.266173	0.716582	8.17949e-05	-0.877582	1.79111e-08	-0.337703	0.106548	0.168472	0.431323	0.51064	0.0107802	-0.37664	0.0696587	0.936155	1.8395e-11	-0.414079	0.0442618	-0.433991	0.0340992	-0.357522	0.0863068	-0.856411	9.34312e-08	0.516879	0.00970249
XLOC_007487	Bra028567	AT5G10780	M1	0.328626	0.116905	0.409482	0.0469154	0.356235	0.087526	-0.405843	0.0491023	0.349697	0.0939205	-0.305969	0.14593	-0.462869	0.0227464	0.260928	0.218132	0.138683	0.518103	-0.165888	0.438524	0.728604	5.40458e-05	-0.844356	2.13794e-07	-0.220789	0.299845	0.112494	0.600731	0.49105	0.0148249	-0.342114	0.101767	0.8467	1.83017e-07	-0.665249	0.000389473	-0.454078	0.0258194	-0.0989005	0.645677	-0.746938	2.75209e-05	0.6636	0.000407511
XLOC_007494	Bra028579	AT5G10540	M1	-0.200877	0.346603	-0.225619	0.289126	-0.203501	0.340206	-0.0889099	0.679507	0.217013	0.308398	0.0932289	0.664804	0.165011	0.440982	-0.155565	0.467922	0.447809	0.0282084	-0.370546	0.0746735	0.105449	0.623862	-0.365171	0.0793213	-0.538274	0.00665985	0.562511	0.00421906	0.374817	0.071131	0.123257	0.566109	0.593754	0.00222193	-0.227072	0.285947	-0.368424	0.0764835	-0.179236	0.402023	-0.648321	0.000612033	0.521504	0.00896243
XLOC_007514	Bra028615	AT5G09810	M1	0.0541599	0.801545	0.132648	0.536649	0.0715153	0.739833	-0.308324	0.142696	0.152874	0.47575	-0.142221	0.507378	-0.260167	0.219526	0.207252	0.331186	0.24446	0.249631	-0.330481	0.11473	0.387878	0.061089	-0.528972	0.00786659	-0.31558	0.133051	0.0962199	0.65469	0.29729	0.158302	-0.500759	0.0126881	0.540335	0.00641455	0.054146	0.801595	-0.28123	0.183108	-0.757235	1.83701e-05	-0.556928	0.00470105	-0.147891	0.490418
XLOC_007547	Bra028870	AT5G02550	M1	0.0922899	0.667991	0.145191	0.49846	0.0965397	0.653613	-0.00521861	0.980692	0.184751	0.387452	-0.159629	0.456228	-0.16981	0.427618	0.252989	0.232968	0.246949	0.24469	-0.211379	0.32143	0.357107	0.0866983	-0.563614	0.00412902	-0.369501	0.0755604	0.245762	0.24704	0.290724	0.168141	-0.255814	0.227614	0.616608	0.00133234	-0.376575	0.0697105	-0.190072	0.373682	-0.262099	0.215997	-0.582043	0.00284675	0.376053	0.0701303
XLOC_007548	Bra028868	AT5G02600	M1	0.265841	0.209272	0.389322	0.0600493	0.302345	0.15101	-0.50918	0.0110462	0.348527	0.0951009	-0.186472	0.382965	-0.393435	0.0571628	0.17529	0.412631	0.271703	0.199025	-0.184178	0.38895	0.677924	0.000272498	-0.66128	0.000434104	-0.141689	0.508984	-0.122921	0.567175	0.506007	0.0116429	-0.472511	0.0197228	0.70269	0.000128771	-0.027278	0.899317	-0.366281	0.0783439	-0.385179	0.0630684	-0.639914	0.000758519	0.161558	0.450734
XLOC_007555	Bra028856	AT5G02960	M1	0.412692	0.0450497	0.435002	0.0336374	0.421936	0.0400009	-0.408506	0.0474943	0.512609	0.0104298	-0.455274	0.025383	-0.458567	0.0242112	0.329699	0.115644	0.0950025	0.6588	-0.079532	0.71182	0.722218	6.75303e-05	-0.922839	1.38784e-10	-0.297699	0.157704	0.250794	0.237184	0.349486	0.0941326	-0.220862	0.299681	0.950056	1.31803e-12	-0.551023	0.00526029	-0.591095	0.00235245	-0.315271	0.133452	-0.787886	4.86253e-06	0.61974	0.00123837
XLOC_007568	Bra028835	AT5G03430	M1	0.278708	0.187234	0.237808	0.263154	0.248614	0.241421	-0.173139	0.418479	0.296848	0.158952	-0.442067	0.0305484	-0.15298	0.47544	0.441411	0.0308254	0.11268	0.600123	0.171675	0.422486	0.288217	0.172007	-0.635042	0.000856509	-0.437769	0.0323992	0.251655	0.235524	-0.112796	0.599746	-0.529912	0.00773702	0.64335	0.000695353	-0.303096	0.149948	-0.00335938	0.98757	-0.516764	0.00972146	-0.516613	0.0097465	0.222267	0.29654
XLOC_007579	Bra028814	AT5G03850	M1	0.287571	0.173013	0.338364	0.105821	0.324701	0.121604	-0.365851	0.0787212	0.494604	0.014011	-0.301821	0.151755	-0.338167	0.106038	0.088737	0.680099	0.210407	0.323712	-0.178717	0.403409	0.646899	0.000634945	-0.778114	7.59611e-06	-0.271161	0.199959	0.25187	0.235111	0.444219	0.0296539	-0.0171439	0.936627	0.880013	1.45353e-08	-0.250981	0.236822	-0.711173	9.79016e-05	-0.357902	0.0859492	-0.763472	1.42429e-05	0.503716	0.0120902
XLOC_007585	Bra028796	AT5G04180	M1	-0.0746405	0.728872	-0.205152	0.336217	-0.142561	0.506354	0.0601933	0.77994	0.234141	0.270803	-0.117685	0.58392	0.207982	0.329447	0.00307107	0.988637	0.483785	0.0166095	-0.183214	0.391482	0.0944918	0.660527	-0.597619	0.00204326	-0.77945	7.15621e-06	0.796959	3.14643e-06	0.187151	0.381204	0.0170738	0.936886	0.804917	2.10922e-06	-0.522396	0.00882521	-0.381229	0.0660547	-0.30119	0.152655	-0.832323	4.57107e-07	0.702012	0.000131567
XLOC_007612	Bra028740	AT5G06160	M1	0.150278	0.483362	0.195712	0.359397	0.190381	0.37289	-0.0870473	0.685884	0.183609	0.390443	-0.168418	0.431471	-0.222112	0.296885	-0.00275704	0.989799	0.324713	0.121589	-0.2367	0.265449	0.514495	0.0101031	-0.686011	0.000215013	-0.321976	0.124946	0.264561	0.211558	0.427995	0.0369413	-0.0790639	0.713447	0.77412	9.05825e-06	-0.26367	0.213158	-0.524234	0.00854801	-0.349798	0.0938193	-0.740966	3.44954e-05	0.440467	0.0312275
XLOC_007633	Bra028701	AT5G07350	M1	0.46026	0.0236258	0.450909	0.0270057	0.453818	0.0259152	-0.31711	0.131079	0.457944	0.0244295	-0.606764	0.00166853	-0.436036	0.0331706	0.597703	0.00203954	-0.0183684	0.932111	0.114528	0.59412	0.580987	0.00290974	-0.86578	4.65578e-08	-0.337917	0.106313	0.216519	0.309527	-0.00118603	0.995612	-0.453544	0.0260165	0.842733	2.37726e-07	-0.349224	0.0943968	-0.298135	0.157067	-0.620844	0.00120663	-0.620311	0.00122186	0.292029	0.166152
XLOC_007647	Bra028670	AT5G08160	M1	-0.265011	0.210752	-0.215469	0.311935	-0.272541	0.197589	-0.0133576	0.950604	-0.109598	0.610196	0.193806	0.36419	0.130563	0.543125	-0.0512137	0.812147	0.255479	0.228245	-0.336763	0.107588	-0.0257564	0.904908	-0.153226	0.474722	-0.373765	0.071992	0.337773	0.106471	0.300061	0.154275	-0.16165	0.450473	0.211903	0.320203	-0.614529	0.00139804	-0.04368	0.8394	0.188409	0.377953	-0.355377	0.088346	0.476362	0.0186102
XLOC_007648	Bra028669	AT5G08180	M1	0.383525	0.0643062	0.402646	0.0510891	0.395825	0.055536	-0.311051	0.139015	0.445174	0.0292636	-0.451015	0.0269653	-0.443429	0.0299798	0.399944	0.0528159	0.138119	0.519824	-0.0823879	0.701926	0.703243	0.000126524	-0.941673	6.98461e-12	-0.350514	0.093103	0.245713	0.247137	0.320828	0.126373	-0.367075	0.0776506	0.96097	9.20837e-14	-0.569577	0.00366945	-0.426746	0.0375564	-0.370825	0.0744384	-0.80383	2.22999e-06	0.587895	0.00251811
XLOC_007654	Bra028666	AT5G08280	M1	0.330504	0.114705	0.234251	0.270572	0.293641	0.163719	-0.100636	0.639866	0.406196	0.0488869	-0.50118	0.0126015	-0.306353	0.1454	0.31042	0.139861	0.000785985	0.997092	-0.0182264	0.932634	0.42312	0.039388	-0.793265	3.76622e-06	-0.400387	0.0525297	0.466144	0.0216801	0.0363622	0.866046	-0.0945988	0.660165	0.773546	9.28759e-06	-0.540505	0.00639467	-0.52427	0.00854267	-0.54397	0.00600034	-0.646638	0.00063922	0.407383	0.0481676
XLOC_007666	Bra028645	AT5G08790	M1	0.448493	0.0279395	0.604941	0.00173815	0.531072	0.00757936	-0.335268	0.109258	0.233395	0.272376	-0.354168	0.0895109	-0.641885	0.000721719	0.409738	0.0467644	-0.13902	0.517079	0.00302929	0.988792	0.775566	8.50233e-06	-0.650725	0.000574944	0.187782	0.379571	-0.272798	0.197149	0.33795	0.106276	-0.315545	0.133096	0.56747	0.00382666	-0.442249	0.0304719	-0.153073	0.475169	0.0887649	0.680003	-0.354092	0.0895847	0.45422	0.0257675
XLOC_007672	Bra023311	NA	M1	0.459717	0.0238124	0.483851	0.0165926	0.47275	0.0196522	-0.394335	0.0565463	0.526933	0.0081541	-0.483373	0.0167158	-0.4689	0.0208146	0.404086	0.0501863	0.130077	0.54464	0.0081104	0.969997	0.735344	4.2439e-05	-0.918669	2.42768e-10	-0.28076	0.183872	0.102883	0.632373	0.293493	0.163941	-0.443013	0.0301525	0.924019	1.17801e-10	-0.392742	0.0576415	-0.399592	0.0530446	-0.42185	0.0400461	-0.755386	1.97817e-05	0.444127	0.0296915
XLOC_007707	Bra023371	AT5G12290	M1	0.435111	0.0335879	0.48752	0.0156713	0.459605	0.0238511	-0.424913	0.038474	0.463647	0.0224896	-0.437491	0.032522	-0.488073	0.0155362	0.362079	0.0820911	0.0919052	0.669298	-0.00518115	0.980831	0.746586	2.78953e-05	-0.888911	6.50086e-09	-0.217842	0.306506	0.0543486	0.800867	0.355993	0.0877568	-0.440544	0.0311944	0.877638	1.78262e-08	-0.555043	0.00487378	-0.365223	0.0792753	-0.227423	0.285184	-0.71874	7.60471e-05	0.564461	0.00406089
XLOC_007732	Bra023413	AT5G13450	M1	0.108184	0.614837	0.116487	0.58778	0.0866247	0.687334	-0.272255	0.198079	0.176295	0.409914	-0.0982073	0.648003	-0.126218	0.55674	0.296218	0.15988	0.252789	0.23335	-0.0485287	0.821838	0.328557	0.116986	-0.413294	0.0447067	-0.256454	0.226412	0.0396053	0.854218	0.213989	0.315352	-0.480345	0.0175135	0.475626	0.0188188	-0.217037	0.308341	0.112318	0.601303	-0.0729424	0.734822	-0.434453	0.0338877	0.296279	0.159791
XLOC_007733	Bra023416	AT5G13480	M1	0.321203	0.125906	0.440395	0.031258	0.378167	0.0684431	-0.452929	0.0262446	0.279316	0.186233	-0.275319	0.192877	-0.431297	0.0353541	0.262981	0.2144	-0.0220118	0.918685	-0.00971695	0.964057	0.604452	0.00175724	-0.589457	0.00243607	-0.0211263	0.921946	-0.103713	0.629616	0.33308	0.111735	-0.390559	0.0591699	0.551276	0.0052352	-0.503434	0.012146	-0.229688	0.280283	0.0358329	0.867979	-0.429895	0.0360214	0.481168	0.0172937
XLOC_007740	Bra023430	AT5G13710	M1	0.152781	0.476021	0.0723643	0.736851	0.134005	0.532453	-0.157378	0.462688	0.39381	0.0569053	-0.24539	0.247778	-0.0434833	0.840115	0.00243875	0.990976	0.410192	0.0464976	-0.136701	0.524159	0.378718	0.0680088	-0.732714	4.66766e-05	-0.578195	0.00308208	0.514751	0.0100594	0.281847	0.182108	-0.0794429	0.71213	0.886881	7.85638e-09	-0.233933	0.271242	-0.583695	0.00275047	-0.529016	0.00786058	-0.857714	8.50546e-08	0.467469	0.0212603
XLOC_007749	Bra023446	AT5G14040	M1	0.33451	0.110111	0.384697	0.0634273	0.352351	0.0912841	-0.279643	0.185696	0.382953	0.0647387	-0.456171	0.0250593	-0.414805	0.0438538	0.350475	0.0931418	0.0870804	0.685771	-0.12741	0.552992	0.608013	0.00162224	-0.85759	8.58212e-08	-0.341301	0.102636	0.29974	0.154738	0.233315	0.272545	-0.252647	0.233621	0.866082	4.54826e-08	-0.40538	0.0493862	-0.546889	0.00568412	-0.566286	0.00391741	-0.728064	5.5086e-05	0.380685	0.0664747
XLOC_007753	Bra023455	AT5G14320	M1	-0.0621021	0.773137	-0.0688089	0.749365	-0.04373	0.839219	-0.0709634	0.741774	0.200091	0.348532	-0.0251927	0.90698	0.0672988	0.754699	-0.201684	0.344629	0.364613	0.0798159	-0.29354	0.163871	0.21012	0.324387	-0.502236	0.0123864	-0.507201	0.0114152	0.57796	0.00309695	0.381692	0.0656991	0.172035	0.421499	0.673117	0.000312643	-0.44523	0.029241	-0.564175	0.00408375	-0.154067	0.472273	-0.709919	0.00010201	0.665598	0.000385751
XLOC_007760	Bra023465	AT5G14420	M1	-0.26504	0.2107	-0.450182	0.027284	-0.336813	0.107533	0.416713	0.0427955	-0.123456	0.565475	0.0761131	0.723725	0.403772	0.0503821	-0.228101	0.283712	0.478761	0.0179432	-0.204295	0.338286	-0.229752	0.280145	-0.285087	0.17692	-0.729727	5.19369e-05	0.743422	3.14595e-05	0.0592035	0.783474	0.0628617	0.770434	0.436843	0.0328094	-0.460072	0.0236905	-0.0703238	0.744025	-0.233614	0.271915	-0.582902	0.00279634	0.478309	0.0180673
XLOC_007761	Bra023466	AT5G14440	M1	0.55599	0.00478631	0.538129	0.00667739	0.564067	0.00409248	-0.417817	0.0421926	0.614756	0.00139073	-0.58205	0.00284633	-0.51163	0.0106029	0.432449	0.0348128	-0.0156309	0.94221	0.145837	0.496529	0.744298	3.04343e-05	-0.899344	2.30976e-09	-0.178856	0.403037	0.0932918	0.664591	0.18246	0.393467	-0.280504	0.184289	0.894306	3.85809e-09	-0.386716	0.061935	-0.44358	0.0299173	-0.347318	0.0963321	-0.651645	0.00056126	0.486936	0.0158151
XLOC_007764	Bra023473	AT5G14530	M1	-0.252087	0.234693	-0.291845	0.166431	-0.27631	0.191215	0.0937527	0.663028	-0.00736816	0.972742	0.11558	0.590711	0.25288	0.233176	-0.173986	0.416172	0.528361	0.00795185	-0.358555	0.0853366	0.0332387	0.877464	-0.443377	0.0300012	-0.699716	0.000141447	0.703216	0.000126633	0.360189	0.0838204	8.49051e-05	0.999686	0.639979	0.000757277	-0.630756	0.000951529	-0.259895	0.220025	-0.0536896	0.803235	-0.760478	1.61085e-05	0.74924	2.51848e-05
XLOC_007765	Bra023474	AT5G14540	M1	-0.0852929	0.691909	0.0976758	0.649789	0.00276528	0.989768	-0.0869491	0.686221	0.0588447	0.784756	0.0942309	0.661409	-0.11364	0.597002	-0.111315	0.604577	0.500993	0.0126399	-0.486097	0.0160235	0.449682	0.0274766	-0.546337	0.00574286	-0.368546	0.0763785	0.216176	0.310312	0.66541	0.000387758	-0.186517	0.382849	0.692544	0.000176595	-0.227846	0.284265	-0.38846	0.060668	-0.236599	0.26566	-0.753748	2.11107e-05	0.433782	0.0341952
XLOC_007779	Bra023503	AT5G15100	M1	0.687865	0.000203429	0.594727	0.00217576	0.674366	0.000301749	-0.331422	0.11364	0.593317	0.00224296	-0.769592	1.10122e-05	-0.627818	0.00102178	0.552897	0.00507706	-0.262147	0.215911	0.289293	0.17034	0.694944	0.00016407	-0.881629	1.26197e-08	-0.0635783	0.767887	0.0180562	0.933262	-0.09891	0.645645	-0.329589	0.115773	0.748833	2.55849e-05	-0.298058	0.157179	-0.40544	0.0493497	-0.620519	0.00121591	-0.465299	0.0219514	0.160233	0.454505
XLOC_007784	Bra023511	AT5G15200	M1	0.0822679	0.702341	-0.00253073	0.990636	0.0470187	0.827299	-0.143682	0.502981	0.380236	0.0668221	-0.231482	0.276438	-0.0148824	0.944974	0.0316386	0.883322	0.312974	0.136459	-0.1848	0.387324	0.299185	0.155541	-0.703017	0.00012744	-0.6134	0.00143486	0.681876	0.000242925	0.265124	0.21055	0.0771024	0.720274	0.858155	8.23775e-08	-0.553149	0.00505278	-0.629712	0.000975998	-0.311866	0.137927	-0.825647	6.79518e-07	0.712412	9.39856e-05
XLOC_007791	Bra023524	AT5G15550	M1	0.40884	0.0472953	0.426489	0.0376842	0.413098	0.044818	-0.315039	0.133753	0.36002	0.083976	-0.477155	0.0183875	-0.459102	0.0240251	0.424198	0.0388363	0.141318	0.510106	-0.0182621	0.932503	0.691804	0.000180619	-0.945681	3.2524e-12	-0.344097	0.09967	0.137878	0.520559	0.273832	0.195389	-0.543429	0.00606054	0.919209	2.26165e-10	-0.559263	0.00449409	-0.265101	0.210592	-0.419745	0.0411553	-0.77866	7.41346e-06	0.485516	0.0161692
XLOC_007826	Bra023592	AT5G17010	M1	0.189297	0.375668	0.0818494	0.703788	0.1263	0.556481	-0.192998	0.36623	0.25841	0.222766	-0.383477	0.0643427	-0.131119	0.541394	0.320416	0.126889	-0.0737832	0.731874	0.0891348	0.678739	0.112675	0.60014	-0.439663	0.0315729	-0.344051	0.099718	0.340034	0.104001	-0.197817	0.35415	-0.281443	0.182762	0.379676	0.067258	-0.317335	0.130791	-0.238996	0.260704	-0.53825	0.00666279	-0.32027	0.127071	0.0409504	0.849321
XLOC_007874	Bra023667	AT5G18190	M1	0.238493	0.261738	0.219883	0.301885	0.2082	0.32893	-0.322649	0.124114	0.327086	0.118733	-0.364109	0.0802646	-0.212625	0.318519	0.370524	0.0746927	0.110619	0.606849	-0.037701	0.86116	0.36469	0.0797471	-0.663218	0.000411787	-0.436674	0.0328849	0.327267	0.118517	0.0772246	0.719848	-0.412232	0.0453133	0.677628	0.000274832	-0.378629	0.0680784	-0.354643	0.0890524	-0.517226	0.00964517	-0.597872	0.002032	0.274401	0.194425
XLOC_007896	Bra023704	NA	M1	0.353074	0.0905755	0.249965	0.23879	0.310936	0.139168	-0.216443	0.309701	0.417788	0.0422085	-0.425135	0.0383615	-0.200248	0.348146	0.222707	0.295559	-0.0517975	0.810044	0.164844	0.44145	0.356058	0.0876947	-0.662746	0.000417126	-0.328131	0.11749	0.374062	0.071748	0.0531936	0.805019	-0.115966	0.589465	0.633393	0.000892052	-0.885838	8.64767e-09	-0.431406	0.0353024	0.0436	0.839691	-0.531594	0.00750944	0.755241	1.98965e-05
XLOC_007906	Bra020041	AT5G19485	M1	0.235988	0.266932	0.147715	0.49094	0.182942	0.392197	-0.365037	0.0794399	0.401582	0.0517637	-0.328911	0.116569	-0.115823	0.589924	0.170963	0.424443	0.30045	0.153715	0.0247813	0.908493	0.371224	0.0741027	-0.708049	0.000108418	-0.505615	0.0117183	0.327115	0.118697	0.170006	0.427079	-0.302564	0.1507	0.798805	2.87211e-06	-0.26758	0.206197	-0.288268	0.171928	-0.442094	0.0305371	-0.73254	4.697e-05	0.404363	0.0500145
XLOC_007907	Bra020043	AT5G19510	M1	-0.202221	0.343318	-0.193513	0.364928	-0.196113	0.358395	-0.0832636	0.698901	0.233608	0.271926	0.216403	0.309793	0.202458	0.34274	-0.323386	0.123208	0.650293	0.000581458	-0.430523	0.0357209	0.207174	0.331372	-0.350147	0.0934693	-0.489556	0.0151784	0.45797	0.0244204	0.573334	0.00340271	0.165356	0.440013	0.639619	0.000764162	0.0281698	0.896043	-0.536378	0.00689244	-0.167453	0.434155	-0.740811	3.46954e-05	0.465491	0.0218893
XLOC_007908	Bra020045	AT5G19530	M1	-0.0839114	0.696667	0.0077006	0.971512	-0.0399772	0.852864	-0.358054	0.0858062	0.236108	0.266682	0.178408	0.404236	-0.0448209	0.835261	-0.348948	0.0946745	0.513387	0.010294	-0.471726	0.0199559	0.44512	0.0292855	-0.480843	0.0173803	-0.316431	0.131951	0.265531	0.209824	0.784671	5.6453e-06	0.0724397	0.736586	0.682252	0.00024026	-0.2797	0.185603	-0.662895	0.000415434	0.0427138	0.842909	-0.773874	9.15577e-06	0.642734	0.000706336
XLOC_007915	Bra020060	AT5G19760	M1	0.378577	0.0681196	0.363509	0.0808007	0.398863	0.0535197	-0.238471	0.261784	0.463933	0.0223954	-0.311952	0.137812	-0.398192	0.05396	0.146488	0.494588	0.162032	0.449389	-0.0509559	0.813077	0.685017	0.000221455	-0.740249	3.54303e-05	-0.12603	0.557334	0.0481087	0.823356	0.406553	0.0486696	-0.128037	0.551023	0.783057	6.07891e-06	-0.280093	0.18496	-0.472346	0.0197717	-0.185435	0.385665	-0.649682	0.000590794	0.482887	0.0168417
XLOC_007918	Bra020065	AT5G19820	M1	0.563911	0.00410504	0.580355	0.00294803	0.582592	0.00281442	-0.421797	0.0400736	0.5502	0.0053424	-0.620721	0.00121013	-0.621835	0.00117873	0.447057	0.0285062	-0.0901536	0.675261	0.0490907	0.819807	0.781047	6.65982e-06	-0.942743	5.7261e-12	-0.145733	0.496839	0.0584367	0.786215	0.19074	0.371972	-0.352711	0.0909309	0.867473	4.08239e-08	-0.403081	0.0508152	-0.500593	0.0127224	-0.536535	0.00687285	-0.647594	0.00062366	0.32576	0.120322
XLOC_007938	Bra020098	AT5G20290	M1	0.268733	0.204174	0.26859	0.204424	0.272132	0.198288	-0.276018	0.191703	0.464446	0.0222279	-0.341269	0.10267	-0.270973	0.200283	0.217915	0.30634	0.285505	0.176259	-0.151103	0.480936	0.598498	0.00200438	-0.865735	4.67182e-08	-0.454715	0.0255862	0.391907	0.0582222	0.371345	0.0740011	-0.174835	0.413864	0.976885	3.11744e-16	-0.421339	0.0403128	-0.574058	0.00335324	-0.400617	0.0523819	-0.867028	4.22641e-08	0.605593	0.00171294
XLOC_007947	Bra020113	NA	M1	0.354372	0.0893137	0.365149	0.0793404	0.357699	0.0861395	-0.268979	0.203744	0.430641	0.0356649	-0.428017	0.036931	-0.416408	0.0429636	0.276075	0.191608	0.188081	0.378801	-0.142082	0.507798	0.671705	0.000325376	-0.924952	1.03274e-10	-0.3638	0.0805407	0.267255	0.20677	0.341307	0.102629	-0.280994	0.183491	0.947483	2.26323e-12	-0.419691	0.0411839	-0.544782	0.00591096	-0.538378	0.00664735	-0.829726	5.34418e-07	0.439165	0.0317888
XLOC_007966	Bra020134	NA	M1	0.308498	0.142459	0.265136	0.210529	0.278722	0.18721	-0.222832	0.295281	0.369896	0.0752247	-0.452617	0.0263612	-0.29045	0.16856	0.34024	0.103778	0.18963	0.374815	-0.0619543	0.773663	0.525088	0.00842165	-0.921031	1.7751e-10	-0.529951	0.00773162	0.43472	0.0337659	0.199119	0.350926	-0.357543	0.0862869	0.94263	5.84873e-12	-0.668293	0.000358004	-0.410331	0.0464163	-0.458508	0.0242316	-0.843774	2.22123e-07	0.591531	0.00233062
XLOC_007973	Bra020153	AT5G21160	M1	0.344626	0.099116	0.371265	0.0740679	0.350285	0.0933319	-0.354164	0.089515	0.422191	0.0398681	-0.4065	0.0487018	-0.342011	0.101876	0.245341	0.247875	0.174867	0.413778	-0.0796015	0.711579	0.62118	0.00119712	-0.88288	1.12957e-08	-0.393886	0.0568532	0.320659	0.126585	0.324809	0.121473	-0.266802	0.207569	0.922309	1.49256e-10	-0.561318	0.0043184	-0.599962	0.00194103	-0.362881	0.0813655	-0.81171	1.47751e-06	0.596782	0.00208088
XLOC_007984	Bra020168	AT5G22010	M1	0.0236811	0.91254	-0.0687837	0.749454	0.0170574	0.936947	0.176088	0.410473	0.151938	0.478488	-0.125864	0.557857	0.226237	0.287771	-0.111509	0.603942	0.109828	0.60944	0.157355	0.462753	-0.0922287	0.668199	-0.147221	0.492406	-0.297979	0.157294	0.442689	0.0302877	-0.13632	0.525328	0.347822	0.0958175	0.285857	0.175703	-0.146124	0.495674	-0.230506	0.278526	-0.0116397	0.956951	-0.226134	0.287997	0.413407	0.0446421
XLOC_007999	Bra020186	AT5G22350	M1	0.616965	0.00132135	0.549195	0.00544431	0.582489	0.00282047	-0.61665	0.00133104	0.666413	0.000377166	-0.626115	0.00106452	-0.497917	0.0132856	0.555839	0.00480022	-0.237411	0.263975	0.357866	0.0859829	0.558919	0.0045241	-0.584222	0.00272035	0.0441187	0.837808	-0.183682	0.390251	-0.145585	0.49728	-0.386721	0.0619313	0.509274	0.0110289	0.129493	0.546464	-0.269174	0.203403	-0.516471	0.00977012	-0.241112	0.25638	-0.0987927	0.646038
XLOC_008005	Bra020193	AT5G22440	M1	0.331516	0.113531	0.312005	0.137743	0.314356	0.134645	-0.292636	0.165233	0.410903	0.0460819	-0.458444	0.0242543	-0.327064	0.118759	0.34533	0.0983824	0.180851	0.397724	-0.0593873	0.782818	0.572361	0.00347016	-0.929502	5.30353e-11	-0.488849	0.0153482	0.386152	0.0623492	0.229966	0.279685	-0.346526	0.0971447	0.960342	1.09434e-13	-0.594257	0.00219795	-0.447715	0.0282452	-0.469372	0.0206691	-0.842653	2.38967e-07	0.568784	0.00372797
XLOC_008019	Bra020220,Bra020221	NA	M1	-0.0345159	0.872792	-0.12375	0.564542	-0.0974748	0.650465	-0.0169071	0.937501	0.018203	0.932721	-0.0353321	0.869809	0.13521	0.528738	0.140275	0.513264	0.141431	0.509764	0.0848436	0.693455	-0.0318341	0.882606	-0.185602	0.38523	-0.313694	0.135511	0.29461	0.162268	-0.0189084	0.93012	-0.150833	0.481731	0.241725	0.255136	-0.547039	0.00566826	0.172418	0.420449	0.265071	0.210645	-0.244106	0.25034	0.522471	0.00881373
XLOC_008037	Bra020251,Bra020253	NA	M1	0.422188	0.0398701	0.427241	0.0373118	0.436864	0.0328005	-0.390188	0.0594324	0.564144	0.00408632	-0.477795	0.0182093	-0.44714	0.0284732	0.331758	0.113251	0.108551	0.613631	-0.0570626	0.791132	0.70823	0.000107783	-0.893082	4.35362e-09	-0.283953	0.178724	0.21965	0.302409	0.287884	0.172525	-0.220267	0.301018	0.937963	1.35246e-11	-0.281871	0.182069	-0.594951	0.00216522	-0.519744	0.00923821	-0.756067	1.9251e-05	0.418237	0.0419646
XLOC_008049	Bra020275	AT5G59910	M1	-0.121728	0.570971	-0.219444	0.302875	-0.156657	0.464766	-0.0507654	0.813763	0.290219	0.168915	0.00870269	0.967807	0.331491	0.11356	-0.175815	0.411212	0.259762	0.22027	-0.0555418	0.796584	-0.112025	0.602259	-0.21552	0.311819	-0.536128	0.00692356	0.695997	0.000158822	0.0887251	0.680139	0.351878	0.0917502	0.429861	0.0360375	-0.455872	0.0251667	-0.444422	0.0295704	0.141025	0.510992	-0.45755	0.0245684	0.732095	4.77259e-05
XLOC_008051	Bra020279	AT5G59860	M1	0.478565	0.017997	0.509393	0.011007	0.514805	0.0100504	-0.316209	0.132237	0.435049	0.0336161	-0.445034	0.0293205	-0.460052	0.0236972	0.385579	0.0627725	-0.0715556	0.739691	0.172498	0.420231	0.595749	0.00212813	-0.545262	0.00585862	0.0863785	0.688179	-0.205288	0.33589	0.0571361	0.790869	-0.229556	0.280566	0.530839	0.0076108	0.203909	0.339218	-0.207206	0.331297	-0.399414	0.0531603	-0.291987	0.166216	-0.00963028	0.964378
XLOC_008073	Bra020309	AT5G59610	M1	0.504774	0.0118818	0.359996	0.0839981	0.459335	0.0239444	-0.183873	0.389752	0.634061	0.000877512	-0.569087	0.00370553	-0.321724	0.125258	0.435413	0.0334514	0.0531873	0.805041	0.213621	0.316203	0.55489	0.00488811	-0.812092	1.44758e-06	-0.314625	0.134292	0.26196	0.21625	0.0104545	0.961331	-0.237428	0.263939	0.836644	3.50384e-07	-0.294299	0.162733	-0.436777	0.032839	-0.46538	0.0219251	-0.625365	0.00108383	0.387014	0.0617176
XLOC_008075	Bra020316	AT5G59470	M1	-0.355762	0.0879775	-0.49625	0.0136467	-0.434021	0.0340853	0.391919	0.0582143	-0.156925	0.463994	0.189311	0.375634	0.463444	0.0225562	-0.257305	0.224821	0.710977	9.85361e-05	-0.324263	0.122137	-0.205508	0.335363	-0.302587	0.150667	-0.828405	5.78051e-07	0.708789	0.000105841	0.204481	0.337836	-0.105798	0.622707	0.498383	0.0131861	-0.293438	0.164024	-0.0364256	0.865814	-0.350731	0.0928865	-0.715773	8.40458e-05	0.36094	0.08313
XLOC_008079	Bra020322	NA	M1	0.172768	0.419492	0.0707103	0.742664	0.113638	0.597007	-0.0358633	0.867868	0.105173	0.624773	-0.2796	0.185766	-0.160856	0.45273	0.435011	0.0336335	0.037998	0.860076	0.0760677	0.723884	0.210556	0.323361	-0.494425	0.0140512	-0.341556	0.102362	0.177673	0.406205	-0.0286858	0.894149	-0.537873	0.00670854	0.426789	0.0375351	-0.663608	0.000407418	0.215755	0.311279	-0.103537	0.630201	-0.377126	0.0692698	0.37559	0.0705041
XLOC_008085	Bra020341	AT5G58990	M1	0.538919	0.00658223	0.544723	0.0059174	0.537001	0.00681522	-0.490457	0.0149644	0.527298	0.00810195	-0.595678	0.0021314	-0.544881	0.00590008	0.450388	0.0272049	-0.0310173	0.885599	0.101248	0.637824	0.738442	3.78832e-05	-0.934082	2.5885e-11	-0.207694	0.330134	0.0909788	0.672449	0.181032	0.397243	-0.376014	0.0701617	0.897806	2.70897e-09	-0.452501	0.0264047	-0.413494	0.044593	-0.422904	0.0394992	-0.676079	0.000287343	0.446452	0.0287478
XLOC_008101	Bra020369	AT5G58420	M1	0.531894	0.00746943	0.541623	0.00626512	0.54131	0.00630119	-0.421033	0.0404736	0.566122	0.00393016	-0.57818	0.00308298	-0.581948	0.00285233	0.449933	0.02738	-0.0197497	0.927018	0.0163465	0.93957	0.78387	5.8568e-06	-0.95648	2.98706e-13	-0.19799	0.35372	0.111976	0.602417	0.240475	0.257676	-0.335524	0.10897	0.915422	3.67698e-10	-0.433179	0.0344737	-0.529237	0.00782986	-0.477556	0.0182756	-0.707638	0.000109872	0.409207	0.0470777
XLOC_008122	Bra020407,snoR103	NA	M1	0.541925	0.00623054	0.559228	0.00449712	0.54317	0.00608949	-0.565909	0.00394667	0.577056	0.0031548	-0.645517	0.000657902	-0.527093	0.00813129	0.501806	0.0124736	-0.321278	0.125812	0.236924	0.264983	0.543772	0.00602227	-0.65837	0.000469563	-0.0269408	0.900556	0.0134387	0.950305	-0.100006	0.641974	-0.290531	0.168437	0.550771	0.00528528	-0.271299	0.199721	-0.452852	0.0262733	-0.47341	0.0194581	-0.306558	0.145117	0.120122	0.576098
XLOC_008161	Bra035637	AT5G56940	M1	0.170581	0.425493	0.119601	0.577768	0.150512	0.482675	-0.158322	0.459972	0.319307	0.128283	-0.317916	0.130048	-0.121712	0.571022	0.199523	0.349931	0.339159	0.104952	-0.12568	0.558439	0.421874	0.0400332	-0.835785	3.69632e-07	-0.623181	0.00114175	0.541278	0.00630487	0.250725	0.237318	-0.240968	0.256672	0.951015	1.0698e-12	-0.555024	0.00487556	-0.402246	0.0513416	-0.417861	0.0421686	-0.886053	8.47863e-09	0.654265	0.000523848
XLOC_008200	Bra035582	AT5G55660	M1	0.180603	0.398383	0.144635	0.500121	0.209892	0.324926	0.0613888	0.775678	0.284087	0.178511	-0.194631	0.362111	-0.0655462	0.760903	-0.118825	0.580255	-0.162013	0.449443	0.14134	0.510037	0.0998599	0.642462	-0.105689	0.623068	0.0908145	0.673009	0.15727	0.462999	-0.0529204	0.806002	0.533785	0.00722128	0.14647	0.494642	-0.0166585	0.938418	-0.409701	0.0467862	0.040765	0.849996	-0.0146045	0.946	0.233458	0.272244
XLOC_008209	Bra035558	AT5G55140	M1	0.106858	0.619206	0.0337588	0.875561	0.0482297	0.822919	-0.166208	0.437628	0.256486	0.226352	-0.250089	0.23855	-0.0325044	0.880152	0.22896	0.281853	0.395112	0.0560176	-0.103428	0.630563	0.306348	0.145407	-0.753449	2.13622e-05	-0.685876	0.000215877	0.493572	0.0142435	0.215209	0.312534	-0.439559	0.0316177	0.840875	2.68052e-07	-0.613186	0.00144193	-0.203207	0.340919	-0.357134	0.0866726	-0.843731	2.2274e-07	0.585881	0.00262737
XLOC_008219	Bra022742	AT5G54770	M1	0.569061	0.00370747	0.620934	0.00120406	0.593247	0.00224635	-0.561901	0.00426968	0.5865	0.00259336	-0.546757	0.00569806	-0.625327	0.0010848	0.499907	0.0128649	-0.0311131	0.885248	0.0613813	0.775704	0.86185	6.27414e-08	-0.924033	1.1757e-10	-0.0965993	0.653412	-0.0350868	0.870705	0.304482	0.148	-0.427716	0.0370781	0.892527	4.59635e-09	-0.412492	0.0451646	-0.460713	0.0234713	-0.307635	0.143637	-0.656417	0.000494749	0.460249	0.0236299
XLOC_008243	Bra022709	AT5G54290	M1	-0.365682	0.0788702	-0.454201	0.0257743	-0.436688	0.0328785	0.161569	0.450701	-0.0670335	0.755637	0.202621	0.342344	0.386007	0.0624559	-0.160937	0.452499	0.543281	0.00607711	-0.365828	0.0787418	-0.173341	0.41793	-0.269417	0.202981	-0.755411	1.9762e-05	0.713377	9.10306e-05	0.255451	0.228298	-0.0850366	0.692791	0.443042	0.0301406	-0.58508	0.00267191	-0.12035	0.575369	-0.0696569	0.746374	-0.640002	0.000756844	0.570873	0.00357549
XLOC_008271	Bra022655	AT5G53420	M1	-0.24538	0.247798	-0.179479	0.401373	-0.241764	0.255057	0.0671775	0.755128	-0.0444355	0.836659	0.11098	0.605669	0.171047	0.424211	0.0602651	0.779684	0.591603	0.00232701	-0.423495	0.0391955	0.0998256	0.642577	-0.401146	0.0520425	-0.655238	0.000510518	0.488878	0.0153413	0.331218	0.113875	-0.280575	0.184173	0.602162	0.00184902	-0.0999669	0.642104	-0.136125	0.525926	-0.450278	0.0272473	-0.699158	0.000143941	0.268347	0.204849
XLOC_008284	Bra022625	AT5G53070	M1	0.0725836	0.736081	-0.0237471	0.912297	0.0215587	0.920353	-0.0581826	0.787124	0.225959	0.28838	-0.268198	0.205112	0.0569562	0.791513	0.155491	0.468138	0.339508	0.104572	-0.0490303	0.820026	0.203668	0.339801	-0.699694	0.000141545	-0.701985	0.000131683	0.673897	0.000305797	0.11129	0.604656	-0.143383	0.503878	0.837348	3.35288e-07	-0.660792	0.000439875	-0.258564	0.22248	-0.2666	0.207926	-0.794775	3.50076e-06	0.748531	2.58854e-05
XLOC_008291	Bra022611,tRNA-Lys	NA	M1	0.337074	0.107243	0.324835	0.121442	0.331188	0.113911	-0.324712	0.12159	0.431216	0.0353921	-0.42211	0.0399102	-0.342309	0.10156	0.300067	0.154267	0.24597	0.246627	-0.0929949	0.665597	0.633219	0.000895886	-0.935333	2.10926e-11	-0.458176	0.0243478	0.31774	0.130272	0.309377	0.141266	-0.368877	0.076094	0.98833	1.78557e-19	-0.464026	0.0223649	-0.465015	0.0220431	-0.498057	0.0132555	-0.874961	2.23275e-08	0.525136	0.00841471
XLOC_008293	Bra022608	NA	M1	0.154684	0.470479	0.205132	0.336266	0.168498	0.431251	-0.244373	0.249805	0.335021	0.109535	-0.192356	0.367859	-0.219056	0.303752	0.153323	0.47444	0.42246	0.0397286	-0.277466	0.189288	0.584274	0.00271738	-0.803592	2.25726e-06	-0.464308	0.0222729	0.343383	0.100421	0.497336	0.0134104	-0.237661	0.263456	0.948482	1.84054e-12	-0.346754	0.0969107	-0.483597	0.016658	-0.352615	0.0910249	-0.893296	4.26286e-09	0.578735	0.00304808
XLOC_008326	Bra022554	NA	M1	-0.0669958	0.755771	0.0432183	0.841077	-0.0241217	0.910919	-0.137276	0.5224	0.160356	0.454153	0.0288626	0.8935	-0.146701	0.493953	-0.0810536	0.706543	0.492257	0.0145443	-0.541731	0.00625277	0.478459	0.0180261	-0.619697	0.00123963	-0.410969	0.0460435	0.354895	0.088809	0.638969	0.00077672	-0.010057	0.9628	0.799507	2.77363e-06	-0.139829	0.514617	-0.590147	0.00240052	-0.392146	0.0580554	-0.830951	4.96612e-07	0.422282	0.0398212
XLOC_008332	Bra022541	AT5G51230	M1	0.326425	0.119523	0.275867	0.191956	0.313123	0.136263	-0.186645	0.382518	0.295965	0.160255	-0.303976	0.148709	-0.221229	0.298859	0.172686	0.419718	-0.22731	0.28543	0.219193	0.303441	0.276833	0.190341	-0.374024	0.0717789	-0.0215116	0.920527	0.0987819	0.646074	0.0155101	0.942657	-0.0516666	0.810515	0.284519	0.177822	-0.816274	1.15388e-06	-0.255459	0.228283	0.379103	0.0677065	-0.190576	0.372391	0.644184	0.000680732
XLOC_008347	Bra022520	NA	M1	0.286689	0.174394	0.299971	0.154405	0.282745	0.18066	-0.232239	0.274827	0.338283	0.10591	-0.433262	0.0344349	-0.377527	0.0689504	0.327163	0.118641	0.0810284	0.706631	-0.139345	0.51609	0.519344	0.00930194	-0.809783	1.63684e-06	-0.371126	0.074185	0.312502	0.137084	0.185183	0.386322	-0.300581	0.153527	0.787862	4.86798e-06	-0.396662	0.0549747	-0.509504	0.0109866	-0.661426	0.000432383	-0.688361	0.000200429	0.254129	0.230797
XLOC_008354	Bra022503	AT1G64970	M1	0.0566208	0.792715	0.0247153	0.908736	0.0103473	0.961727	-0.258317	0.222939	0.376319	0.0699166	-0.126527	0.555769	-0.0973317	0.650946	0.193815	0.364166	0.171584	0.422735	-0.212321	0.319229	0.275028	0.193366	-0.478725	0.017953	-0.377192	0.0692171	0.401425	0.0518638	0.264607	0.211474	-0.0802299	0.709398	0.561986	0.00426254	-0.47255	0.0197113	-0.430122	0.0359125	-0.107838	0.615975	-0.547065	0.00566547	0.490381	0.0149823
XLOC_008365	Bra022484	AT1G65290	M1	0.124132	0.563333	0.12355	0.565176	0.12396	0.563876	-0.291742	0.166588	0.366255	0.0783665	-0.139357	0.516051	-0.138542	0.518535	0.0633352	0.768751	0.313793	0.135381	-0.18556	0.385338	0.38254	0.0650521	-0.460528	0.0235345	-0.257211	0.224998	0.154075	0.472248	0.273686	0.195637	-0.0847113	0.693911	0.604109	0.00177072	0.347609	0.0960343	-0.447665	0.0282653	-0.599725	0.00195117	-0.544633	0.00592725	-0.0141106	0.947823
XLOC_008379	Bra039738	AT1G65700	M1	-0.0919097	0.669282	-0.21774	0.306739	-0.169024	0.429791	-0.0258772	0.904464	0.133891	0.532805	-0.113403	0.597773	0.242848	0.252866	-0.0442295	0.837406	0.568609	0.003741	-0.153191	0.474825	0.0298293	0.889954	-0.568609	0.00374097	-0.833343	4.29596e-07	0.643475	0.000693152	0.123715	0.564655	-0.293338	0.164175	0.730618	5.03169e-05	-0.260382	0.21913	-0.21788	0.306421	-0.621497	0.00118818	-0.826918	6.30953e-07	0.332164	0.112784
XLOC_008386	Bra039748	AT1G66070	M1	0.597782	0.002036	0.681647	0.000244557	0.635781	0.000840985	-0.60085	0.00190343	0.67335	0.000310585	-0.516873	0.00970336	-0.58808	0.00250825	0.37212	0.0733528	-0.142843	0.505504	0.167364	0.434403	0.768733	1.14224e-05	-0.707987	0.000108635	0.0930786	0.665313	-0.2012	0.345812	0.23443	0.270194	-0.233015	0.27318	0.663783	0.000405469	-0.152141	0.477893	-0.526096	0.00827457	-0.217467	0.307361	-0.425494	0.038181	0.271104	0.200057
XLOC_008424	Bra033995	NA	M1	0.447399	0.0283702	0.391775	0.0583151	0.426963	0.0374491	-0.34379	0.0999917	0.520983	0.00904332	-0.518138	0.00949608	-0.397321	0.0545356	0.406813	0.0485119	0.138871	0.517532	0.0410644	0.848906	0.662663	0.000418076	-0.956535	2.94677e-13	-0.403548	0.050522	0.268902	0.203879	0.217588	0.307086	-0.407571	0.0480541	0.968609	8.69132e-15	-0.538771	0.00660006	-0.434894	0.0336867	-0.435448	0.0334355	-0.810499	1.57594e-06	0.549	0.00546419
XLOC_008436	Bra033975	AT1G67830	M1	-0.0836475	0.697577	-0.229113	0.281521	-0.14566	0.497058	0.159293	0.457191	0.115114	0.59222	-0.0758245	0.724733	0.28184	0.182119	-0.0908634	0.672842	0.49561	0.0137874	-0.128578	0.549329	0.0256144	0.90543	-0.537616	0.00673986	-0.775229	8.62908e-06	0.804698	2.13308e-06	0.158019	0.460845	0.0442829	0.837213	0.733593	4.52211e-05	-0.579312	0.0030121	-0.372608	0.0729472	-0.20703	0.331716	-0.791755	4.0493e-06	0.740795	3.47163e-05
XLOC_008489	Bra038331	AT1G69030	M1	0.330467	0.114747	0.487465	0.0156848	0.422544	0.0396853	-0.203574	0.34003	0.17359	0.417249	-0.235429	0.2681	-0.581731	0.00286522	0.19659	0.357205	-0.0395709	0.854343	-0.211315	0.32158	0.755602	1.96122e-05	-0.65694	0.000487895	0.115903	0.589667	-0.111172	0.605042	0.501575	0.0125206	-0.14339	0.503858	0.596982	0.00207184	-0.515986	0.00985094	-0.4189	0.0416074	0.0427921	0.842625	-0.472304	0.0197841	0.50251	0.0123311
XLOC_008496	Bra038320	AT1G69240	M1	0.168865	0.430234	0.148474	0.488689	0.167233	0.434766	-0.203005	0.341409	0.230707	0.278095	-0.206866	0.332108	-0.153886	0.472798	0.0474323	0.825802	0.425527	0.0381644	-0.159461	0.45671	0.489152	0.0152753	-0.798882	2.86116e-06	-0.516572	0.00975322	0.316886	0.131366	0.415968	0.0432062	-0.366244	0.0783758	0.885762	8.70783e-09	-0.481189	0.0172882	-0.347244	0.0964074	-0.337065	0.107253	-0.884275	9.96716e-09	0.575055	0.0032861
XLOC_008546	Bra007930	AT1G70620	M1	0.338899	0.105236	0.301402	0.152352	0.320804	0.126404	-0.27571	0.192219	0.430689	0.0356422	-0.451309	0.0268538	-0.318195	0.129692	0.302812	0.150349	0.180699	0.398127	-0.0585607	0.785772	0.571203	0.00355195	-0.903064	1.5537e-09	-0.455741	0.025214	0.390652	0.0591041	0.231424	0.276563	-0.225797	0.288734	0.956025	3.34203e-13	-0.49778	0.013315	-0.496409	0.0136118	-0.465348	0.0219355	-0.823269	7.79472e-07	0.560713	0.00436952
XLOC_008550	Bra007945,Bra007947,Bra007949,Bra007950,Bra007951	NA	M1	0.631324	0.000938446	0.574846	0.0033001	0.606529	0.00167737	-0.641969	0.000720176	0.742367	3.27337e-05	-0.585649	0.0026402	-0.462706	0.0228005	0.54617	0.00576064	-0.182299	0.393891	0.367509	0.0772731	0.649114	0.000599573	-0.704438	0.000121791	-0.0500784	0.816241	-0.0265398	0.902029	0.0207202	0.923442	-0.349418	0.0942009	0.673871	0.000306028	-0.400237	0.0526269	-0.389418	0.0599803	-0.0646645	0.76403	-0.406083	0.0489556	0.473741	0.0193616
XLOC_008589	Bra008003	AT1G72040	M1	-0.068262	0.751295	-0.0771876	0.719977	-0.0678016	0.752922	0.0308448	0.886231	0.210534	0.323413	0.0133153	0.950761	0.0721931	0.737452	-0.0912029	0.671686	0.566826	0.0038758	-0.338217	0.105982	0.271253	0.199799	-0.501009	0.0126366	-0.519104	0.00934027	0.439847	0.0314936	0.406162	0.0489076	0.0187312	0.930773	0.72428	6.28852e-05	0.0648674	0.76331	-0.433698	0.0342339	-0.458948	0.0240785	-0.760982	1.57804e-05	0.309947	0.140497
XLOC_008603	Bra008030	AT1G72370	M1	0.122559	0.568325	0.101439	0.637186	0.100165	0.641443	-0.198268	0.353032	0.293634	0.163729	-0.287883	0.172527	-0.151749	0.479041	0.188136	0.37866	0.334855	0.109722	-0.234372	0.270317	0.422041	0.0399465	-0.830293	5.16611e-07	-0.625566	0.00107863	0.555345	0.00484575	0.302091	0.15137	-0.230952	0.27757	0.934278	2.50754e-11	-0.543869	0.00601156	-0.47413	0.0192486	-0.496599	0.0135703	-0.895827	3.3137e-09	0.584014	0.00273223
XLOC_008607	Bra008033	AT1G72450	M1	-0.0626951	0.771027	0.0568993	0.791717	-0.0496896	0.817645	-0.0735854	0.732567	-0.0876649	0.683767	-0.0788996	0.714018	-0.0992164	0.644617	0.371296	0.0740423	0.317323	0.130805	-0.268562	0.204472	0.206887	0.332058	-0.409032	0.0471815	-0.412095	0.045392	0.143331	0.504034	0.143172	0.504515	-0.606426	0.00168126	0.460707	0.0234732	0.0294525	0.891336	0.131726	0.539508	-0.622889	0.00114968	-0.465857	0.0217719	-0.0925828	0.666996
XLOC_008616	Bra008045	AT1G72730	M1	0.55822	0.0045856	0.553249	0.00504325	0.571642	0.00352076	-0.388157	0.0608866	0.599949	0.00194157	-0.597898	0.00203083	-0.585726	0.00263593	0.447018	0.0285218	-0.100087	0.641702	0.0662791	0.758307	0.774605	8.86833e-06	-0.942614	5.8663e-12	-0.163148	0.446229	0.139156	0.516665	0.222418	0.296203	-0.251096	0.236601	0.887828	7.19512e-09	-0.607522	0.00164029	-0.555119	0.00486679	-0.303054	0.150007	-0.663595	0.000407558	0.563204	0.00416232
XLOC_008625	Bra008057	AT1G72880	M1	0.0657447	0.7602	0.194571	0.362261	0.120393	0.575233	0.0364635	0.865676	0.0572014	0.790635	-0.128039	0.551016	-0.41035	0.0464052	0.245872	0.246821	0.0193651	0.928436	-0.39533	0.0558697	0.417452	0.042391	-0.404942	0.0496563	-0.0105443	0.960999	0.00116726	0.995681	0.280007	0.185101	-0.138314	0.519229	0.359856	0.084128	0.0187122	0.930843	-0.229803	0.280035	-0.521458	0.00896951	-0.312491	0.137098	-0.142329	0.507052
XLOC_008640	Bra008077	AT1G73170	M1	0.122234	0.569361	-0.0703837	0.743814	0.0281413	0.896148	-0.0840338	0.696245	0.273219	0.196431	-0.34268	0.101165	0.146969	0.493157	0.134395	0.531248	0.271951	0.1986	0.130389	0.543669	0.0530377	0.805579	-0.632781	0.000905568	-0.745223	2.9384e-05	0.706536	0.000113855	-0.102015	0.635265	-0.19023	0.373277	0.729752	5.18921e-05	-0.622869	0.00115023	-0.251589	0.235651	-0.376144	0.0700566	-0.705217	0.000118791	0.602516	0.00183455
XLOC_008668	Bra008128,Bra008130	NA	M1	0.543279	0.00607726	0.545015	0.00588543	0.544576	0.00593355	-0.380097	0.0669305	0.585644	0.00264046	-0.465723	0.021815	-0.498697	0.0131194	0.331651	0.113375	-0.0688414	0.74925	0.12469	0.561567	0.728704	5.38548e-05	-0.761219	1.56281e-05	-0.0210691	0.922157	0.0276212	0.898057	0.281194	0.183166	-0.108005	0.615426	0.739577	3.6325e-05	-0.530573	0.0076468	-0.546037	0.00577488	0.0219854	0.918782	-0.533239	0.00729218	0.617352	0.00130949
XLOC_008682	Bra008144,Bra008145	NA	M1	0.296958	0.15879	0.315706	0.132887	0.313671	0.135542	-0.271446	0.199467	0.452174	0.0265273	-0.352198	0.0914349	-0.327371	0.118392	0.222919	0.295089	0.213548	0.316374	-0.13973	0.514919	0.630305	0.000962049	-0.842771	2.37148e-07	-0.356748	0.0870384	0.340121	0.103907	0.36646	0.0781868	-0.0974604	0.650513	0.940636	8.43689e-12	-0.413719	0.0444653	-0.577514	0.00312535	-0.334621	0.109986	-0.804399	2.166e-06	0.611856	0.00148655
XLOC_008712	Bra008201	AT1G75500	M1	0.171615	0.422649	0.185705	0.384962	0.193384	0.365255	-0.374308	0.0715461	0.315706	0.132888	-0.100176	0.641404	-0.260488	0.218937	-0.217946	0.30627	0.266783	0.207603	-0.258771	0.222099	0.529577	0.00778299	-0.585593	0.00264332	-0.166779	0.436032	0.0982801	0.647759	0.542886	0.00612145	-0.0150891	0.94421	0.646132	0.000647596	-0.170776	0.424956	-0.63252	0.000911374	-0.256834	0.2257	-0.660335	0.000445349	0.339866	0.104183
XLOC_008723	Bra008213,Bra008214	NA	M1	0.00494643	0.981699	0.176836	0.408457	0.0923303	0.667853	-0.31982	0.127637	0.195827	0.35911	0.0825704	0.701295	-0.282664	0.180791	-0.0514372	0.811342	0.412093	0.0453937	-0.515552	0.00992385	0.61921	0.00125388	-0.566779	0.0038794	-0.196449	0.357555	0.0411627	0.848549	0.766191	1.27166e-05	-0.212497	0.318817	0.694444	0.000166613	-0.15341	0.474186	-0.475107	0.0189671	-0.164511	0.442386	-0.718863	7.57315e-05	0.408887	0.0472678
XLOC_008759	Bra008279	NA	M1	0.748296	2.6121e-05	0.699063	0.000144373	0.736771	4.02832e-05	-0.446094	0.0288915	0.660697	0.000441013	-0.816917	1.11382e-06	-0.699755	0.000141275	0.683386	0.000232384	-0.306713	0.144902	0.307671	0.143588	0.782391	6.26608e-06	-0.948779	1.72965e-12	-0.0553564	0.797249	-0.00211921	0.992159	-0.0620698	0.773252	-0.416883	0.0427021	0.804575	2.1466e-06	-0.453795	0.0259239	-0.428875	0.0365132	-0.512499	0.0104492	-0.490524	0.0149486	0.281792	0.182198
XLOC_008788	Bra008332	AT1G77750	M1	-0.0773891	0.719275	-0.152696	0.47627	-0.112589	0.600421	0.0909503	0.672547	0.115525	0.59089	-0.0416868	0.846642	0.198405	0.352692	-0.111923	0.602592	0.587296	0.00255018	-0.2051	0.336343	0.123208	0.566263	-0.506493	0.0115498	-0.661528	0.000431187	0.568533	0.00374667	0.237913	0.262937	-0.0558984	0.795304	0.718138	7.76154e-05	-0.0516784	0.810473	-0.316215	0.13223	-0.523331	0.00868333	-0.772739	9.61882e-06	0.333629	0.11111
XLOC_008847	Bra008421	AT1G79550	M1	0.291638	0.166747	0.122266	0.569257	0.207652	0.330234	-0.20752	0.330548	0.420814	0.0405889	-0.491931	0.0146197	-0.0428326	0.842478	0.464681	0.0221513	-0.00776691	0.971267	0.304458	0.148034	0.0981329	0.648253	-0.445623	0.0290817	-0.407032	0.0483792	0.349828	0.0937889	-0.37873	0.0679989	-0.269486	0.20286	0.482472	0.0169501	0.0473673	0.826037	-0.134888	0.529729	-0.675241	0.000294308	-0.316914	0.13133	-0.0272223	0.899522
XLOC_008859	Bra008443	NA	M1	0.275274	0.192953	0.253023	0.232902	0.264286	0.212051	-0.255893	0.227465	0.357499	0.086328	-0.392969	0.0574845	-0.279806	0.18543	0.259404	0.22093	0.300363	0.15384	-0.12272	0.567812	0.552708	0.0050953	-0.893851	4.03593e-09	-0.510829	0.0107462	0.344666	0.099074	0.266963	0.207284	-0.386549	0.0620578	0.953255	6.45922e-13	-0.333281	0.111505	-0.411567	0.0456967	-0.649938	0.000586862	-0.869621	3.44656e-08	0.379205	0.0676263
XLOC_008867	Bra008462,Bra008463,Bra008464	NA	M1	-0.123553	0.565167	-0.245677	0.247208	-0.153334	0.474408	0.166533	0.436721	0.156321	0.465735	0.00200425	0.992584	0.296798	0.159026	-0.201946	0.343989	0.364053	0.0803143	-0.128115	0.550779	-0.0501708	0.815908	-0.259467	0.220814	-0.507084	0.0114374	0.668588	0.000355071	0.089296	0.678188	0.398525	0.0537414	0.492106	0.0145791	-0.156815	0.46431	-0.385407	0.0628997	-0.111489	0.604008	-0.502522	0.0123288	0.536633	0.00686072
XLOC_008893	Bra008512	NA	M1	0.0713298	0.740485	-0.00978711	0.963798	0.0259876	0.904059	-0.209707	0.325361	0.318783	0.128946	-0.221738	0.29772	0.0423961	0.844064	0.122685	0.567924	0.448026	0.0281229	-0.10663	0.619959	0.287337	0.173379	-0.730407	5.06969e-05	-0.714379	8.80513e-05	0.590094	0.00240326	0.233686	0.271762	-0.254933	0.229275	0.900688	2.00501e-09	-0.479282	0.017801	-0.315484	0.133175	-0.366419	0.0782225	-0.879124	1.56974e-08	0.653218	0.000538528
XLOC_008907	Bra008544	NA	M1	-0.149749	0.484923	-0.162817	0.447165	-0.14401	0.501996	0.034078	0.874393	0.183765	0.390033	0.202031	0.343782	0.21988	0.301891	-0.314146	0.134918	0.526104	0.00827351	-0.299459	0.155143	0.168617	0.430921	-0.303176	0.149835	-0.407086	0.0483467	0.505489	0.0117429	0.512136	0.010513	0.36725	0.0774979	0.581562	0.0028753	-0.282765	0.180627	-0.501636	0.0125081	0.242988	0.252584	-0.638074	0.000794325	0.792887	3.83538e-06
XLOC_008913	Bra008554	AT4G01590	M1	0.332366	0.112552	0.299816	0.154629	0.334612	0.109996	-0.186852	0.381981	0.404891	0.0496879	-0.374424	0.0714518	-0.237611	0.26356	0.176994	0.408031	0.206981	0.331833	0.0168456	0.937728	0.53924	0.00654389	-0.774658	8.84776e-06	-0.345396	0.0983131	0.32892	0.116558	0.235215	0.268548	-0.0705334	0.743287	0.867034	4.22444e-08	-0.374714	0.0712147	-0.514744	0.0100607	-0.273243	0.196391	-0.728689	5.38835e-05	0.598366	0.00201017
XLOC_008939	Bra033134	AT4G11740	M1	0.413719	0.0444655	0.469153	0.0207363	0.42801	0.036934	-0.343658	0.100131	0.420472	0.0407692	-0.428281	0.0368017	-0.528574	0.007922	0.417952	0.0421194	0.0836022	0.697733	-0.111542	0.603835	0.726677	5.78411e-05	-0.848394	1.63317e-07	-0.193662	0.364552	0.0523187	0.808167	0.319836	0.127617	-0.43968	0.0315656	0.812879	1.38772e-06	-0.297912	0.157392	-0.458475	0.0242435	-0.535141	0.00704768	-0.672959	0.000314048	0.232367	0.274554
XLOC_008943	Bra033140	NA	M1	0.410062	0.0465736	0.56417	0.00408416	0.474662	0.0190948	-0.508216	0.0112247	0.376199	0.0700128	-0.321341	0.125735	-0.619958	0.00123205	0.374847	0.0711067	0.0685839	0.750159	-0.129438	0.546636	0.813966	1.30863e-06	-0.67988	0.000257487	0.0814368	0.705216	-0.323989	0.122471	0.419245	0.0414225	-0.505759	0.0116905	0.648744	0.000605362	0.140931	0.511275	-0.318273	0.129594	-0.504992	0.0118393	-0.488371	0.0154639	-0.0491986	0.819418
XLOC_008990	Bra021958	AT5G45275	M1	0.691812	0.000180579	0.607817	0.00162943	0.67348	0.000309443	-0.173125	0.418519	0.551255	0.00523723	-0.70663	0.000113511	-0.515154	0.00999099	0.637075	0.000814359	-0.353722	0.0899437	0.496958	0.0134923	0.531986	0.00745716	-0.596527	0.00209245	0.106992	0.618763	-0.129836	0.545393	-0.284764	0.177434	-0.26108	0.217854	0.471045	0.0201602	-0.159414	0.456844	-0.16129	0.451494	-0.314179	0.134875	-0.144419	0.50077	0.103505	0.630306
XLOC_009003	Bra021978	NA	M1	0.452349	0.0264614	0.3682	0.0766761	0.39312	0.0573799	-0.220312	0.300918	0.327525	0.118209	-0.589162	0.00245135	-0.405799	0.0491297	0.612683	0.0014587	-0.0250045	0.907672	0.206593	0.332761	0.467799	0.0211569	-0.775133	8.66551e-06	-0.305598	0.146446	0.0468884	0.82777	-0.107834	0.61599	-0.690877	0.000185776	0.65742	0.00048168	-0.397599	0.0543516	0.081768	0.70407	-0.565882	0.00394879	-0.49804	0.0132592	0.123957	0.563887
XLOC_009004	Bra021979	NA	M1	0.484122	0.016523	0.590518	0.00238164	0.529239	0.00782964	-0.398358	0.0538507	0.393667	0.0570036	-0.472545	0.0197126	-0.626066	0.00106577	0.447441	0.0283537	0.0613332	0.775876	-0.0703762	0.74384	0.850493	1.41544e-07	-0.921516	1.66279e-10	-0.121736	0.570947	-0.0730736	0.734361	0.372475	0.0730577	-0.507712	0.011319	0.870159	3.30181e-08	-0.358791	0.0851163	-0.371644	0.0737504	-0.429064	0.0364214	-0.69323	0.00017293	0.333522	0.111231
XLOC_009006	Bra021983	AT5G45590	M1	0.225059	0.290357	0.192232	0.368174	0.202472	0.342707	-0.300006	0.154354	0.335791	0.108671	-0.305212	0.146982	-0.211807	0.320429	0.192569	0.367318	0.366097	0.0785052	-0.139464	0.515726	0.526567	0.00820661	-0.877983	1.73102e-08	-0.561928	0.00426739	0.368865	0.0761045	0.35627	0.0874924	-0.42084	0.0405751	0.952575	7.54746e-13	-0.532683	0.007365	-0.378389	0.0682678	-0.423007	0.0394459	-0.917384	2.86682e-10	0.574639	0.00331398
XLOC_009015	Bra021990	AT5G45775	M1	0.48491	0.0163222	0.449818	0.0274243	0.470353	0.0203695	-0.345369	0.0983417	0.523345	0.00868119	-0.567918	0.00379272	-0.483824	0.0165996	0.474037	0.0192755	0.0525039	0.8075	0.0227596	0.915931	0.686858	0.000209654	-0.934571	2.39064e-11	-0.311778	0.138044	0.209827	0.325079	0.161241	0.451635	-0.366056	0.0785413	0.921116	1.75503e-10	-0.349786	0.0938319	-0.479129	0.0178427	-0.604744	0.0017458	-0.729775	5.18492e-05	0.342893	0.100939
XLOC_009023	Bra022003	NA	M1	0.301987	0.151519	0.371894	0.0735416	0.330018	0.11527	-0.347432	0.0962149	0.401493	0.0518203	-0.324665	0.121648	-0.421227	0.0403716	0.274118	0.194904	0.254056	0.230936	-0.22646	0.287284	0.727191	5.68061e-05	-0.905214	1.22655e-09	-0.347622	0.0960216	0.203227	0.340871	0.483209	0.0167582	-0.371252	0.074079	0.952628	7.45698e-13	-0.453882	0.0258916	-0.521959	0.00889224	-0.404152	0.0501457	-0.858199	8.21128e-08	0.517271	0.00963775
XLOC_009035	Bra022023	AT5G46210	M1	-0.290381	0.168665	-0.173724	0.416884	-0.245214	0.248129	0.0363692	0.86602	-0.185222	0.386221	0.306373	0.145373	0.022286	0.917675	-0.234743	0.269539	0.299434	0.155181	-0.500599	0.0127211	0.0726929	0.735697	-0.0947855	0.659533	-0.181699	0.395477	0.103522	0.630251	0.480665	0.0174279	-0.13125	0.540988	0.132505	0.53709	-0.271249	0.199807	-0.114205	0.595167	0.0183769	0.932079	-0.312432	0.137176	0.16909	0.42961
XLOC_009077	Bra022114	AT5G47210	M1	0.312936	0.136509	0.319334	0.128249	0.329356	0.116046	-0.299931	0.154463	0.502313	0.0123709	-0.34809	0.0955441	-0.295442	0.161029	0.215504	0.311856	0.206039	0.334088	-0.0872561	0.685168	0.615818	0.001357	-0.802595	2.37469e-06	-0.334676	0.109924	0.333101	0.111711	0.346488	0.0971842	-0.0554842	0.79679	0.91955	2.16237e-10	-0.374019	0.0717832	-0.584217	0.00272066	-0.26252	0.215234	-0.767254	1.21605e-05	0.639309	0.000770123
XLOC_009149	Bra026583	AT2G02720	M1	0.049229	0.819308	0.128798	0.548638	0.0896597	0.676947	-0.258966	0.221737	0.17785	0.405732	-0.0546893	0.799643	-0.206717	0.332463	-0.0195003	0.927937	0.325918	0.120133	-0.347339	0.0963105	0.430748	0.0356139	-0.495451	0.0138225	-0.248003	0.242617	0.106989	0.618775	0.427107	0.037378	-0.268334	0.204872	0.562138	0.00424996	0.106831	0.619293	-0.481804	0.0171253	-0.601504	0.00187614	-0.592654	0.00227518	-0.0210017	0.922405
XLOC_009152	Bra026586	AT2G02560	M1	0.103158	0.631458	-0.0421337	0.845018	0.0307117	0.886719	0.0949522	0.65897	-0.015643	0.942166	-0.358891	0.0850231	0.0036579	0.986466	0.24494	0.248673	0.143895	0.50234	0.0752942	0.726586	-0.000592335	0.997808	-0.502787	0.0122755	-0.565967	0.00394217	0.407229	0.0482606	-0.249648	0.239406	-0.46553	0.0218768	0.444876	0.0293849	-0.293338	0.164175	0.0560326	0.794823	-0.763675	1.41234e-05	-0.458688	0.024169	-0.0370563	0.863512
XLOC_009188	Bra026635	NA	M1	-0.0073749	0.972717	-0.0649361	0.763066	-0.0423125	0.844368	-0.143838	0.502511	0.239787	0.259082	-0.101077	0.638392	0.125509	0.558978	-0.0483792	0.822378	0.594936	0.00216596	-0.203056	0.341285	0.247482	0.243642	-0.655214	0.000510843	-0.726246	5.87196e-05	0.559148	0.00450411	0.328825	0.11667	-0.210184	0.324237	0.860177	7.10405e-08	-0.234278	0.270515	-0.392664	0.0576955	-0.477784	0.0182123	-0.907216	9.79152e-10	0.489303	0.0152389
XLOC_009290	Bra032981	AT3G27090	M1	0.348089	0.0955461	0.464213	0.0223039	0.392811	0.0575939	-0.577458	0.00312893	0.399578	0.0530534	-0.307217	0.14421	-0.450889	0.0270133	0.304174	0.148432	0.181462	0.396104	-0.09087	0.67282	0.73622	4.11033e-05	-0.79562	3.35965e-06	-0.201889	0.344127	-0.0471369	0.826871	0.456658	0.0248851	-0.561758	0.00428159	0.810318	1.59109e-06	-0.359534	0.0844257	-0.368712	0.0762359	-0.269581	0.202695	-0.701833	0.000132318	0.418422	0.041865
XLOC_009309	Bra032952	AT3G26780	M1	0.317458	0.130633	0.2641	0.212384	0.308242	0.142807	-0.257004	0.225384	0.377305	0.0691276	-0.374295	0.0715571	-0.29188	0.166378	0.202814	0.341874	0.294104	0.163025	-0.0616988	0.774573	0.563567	0.00413278	-0.831144	4.90869e-07	-0.412315	0.0452658	0.203282	0.340739	0.263109	0.214169	-0.402346	0.0512788	0.872977	2.62945e-08	-0.175154	0.413001	-0.367944	0.0768967	-0.642894	0.000703469	-0.793964	3.64114e-06	0.255715	0.2278
XLOC_009313	Bra032943,Bra032944	NA	M1	0.454302	0.0257374	0.539785	0.00647926	0.491527	0.0147136	-0.523529	0.00865354	0.495771	0.0137518	-0.411117	0.0459575	-0.555248	0.00485476	0.33079	0.114372	0.124602	0.561843	-0.0900916	0.675473	0.840104	2.8162e-07	-0.900779	1.98583e-09	-0.156238	0.465976	-0.0163382	0.9396	0.451579	0.0267514	-0.417659	0.0422785	0.903405	1.4971e-09	-0.342034	0.101852	-0.507867	0.01129	-0.352755	0.0908875	-0.747074	2.73777e-05	0.427717	0.0370779
XLOC_009315	Bra032942	AT3G26700	M1	0.120805	0.573917	-0.170946	0.424489	0.0282124	0.895887	0.251499	0.235825	0.341921	0.101972	-0.226976	0.286156	0.199685	0.349531	-0.000834117	0.996914	0.106429	0.620622	0.227858	0.284238	-0.109371	0.61094	-0.16809	0.432383	-0.305713	0.146286	0.438452	0.0320995	-0.282238	0.181476	0.296831	0.158977	0.274834	0.193694	0.13763	0.521318	-0.22156	0.298118	-0.346691	0.0969751	-0.196502	0.357424	0.0829273	0.700062
XLOC_009320	Bra032932	AT3G26410	M1	0.425657	0.0380994	0.476443	0.0185874	0.448959	0.0277574	-0.363511	0.0807992	0.474209	0.0192256	-0.449074	0.0277126	-0.483163	0.0167701	0.398587	0.0537002	0.0507458	0.813834	-0.0244881	0.909571	0.727446	5.62988e-05	-0.882065	1.21424e-08	-0.226743	0.286666	0.168709	0.430665	0.328963	0.116507	-0.26001	0.219813	0.892991	4.39241e-09	-0.598711	0.00199506	-0.449708	0.0274668	-0.180678	0.398182	-0.707978	0.000108667	0.653531	0.000534114
XLOC_009363	Bra020782	AT3G06050	M1	-0.237317	0.264169	-0.293969	0.163226	-0.287873	0.172543	0.137282	0.522382	-0.0225534	0.916691	0.042784	0.842655	0.326317	0.119653	-0.0617621	0.774348	0.649944	0.000586773	-0.265141	0.21052	-0.0208586	0.922932	-0.467471	0.0212597	-0.826675	6.3996e-07	0.688605	0.000198966	0.224884	0.29074	-0.151427	0.479987	0.698595	0.000146501	-0.340425	0.103579	-0.0767978	0.721336	-0.32497	0.121277	-0.798304	2.94434e-06	0.549062	0.00545784
XLOC_009407	Bra020720,Bra020721	NA	M1	0.423535	0.0391748	0.433066	0.0345258	0.440231	0.0313283	-0.3235	0.123069	0.463803	0.0224381	-0.483127	0.0167793	-0.462162	0.0229822	0.359994	0.0840001	0.0618946	0.773876	-0.0272384	0.899463	0.704097	0.000123129	-0.916013	3.41332e-10	-0.28187	0.182071	0.235258	0.268458	0.281812	0.182165	-0.257609	0.224254	0.92406	1.17122e-10	-0.578347	0.00307243	-0.479105	0.0178493	-0.310423	0.139855	-0.746703	2.77706e-05	0.612418	0.00146755
XLOC_009419	Bra020709	AT5G48250	M1	0.182218	0.394104	0.0488325	0.82074	0.130771	0.54248	-0.154787	0.470178	0.322105	0.124786	-0.261443	0.21719	-0.000496334	0.998163	0.0228182	0.915716	0.428193	0.0368448	-0.0140579	0.948018	0.33741	0.106872	-0.759677	1.66434e-05	-0.633396	0.000891989	0.479991	0.0176089	0.234674	0.269683	-0.267979	0.205496	0.87372	2.47407e-08	-0.493605	0.0142359	-0.353366	0.0902909	-0.34237	0.101494	-0.871397	2.98943e-08	0.615295	0.00137353
XLOC_009435	Bra020681	NA	M1	0.3692	0.0758178	0.369638	0.0754439	0.374905	0.0710597	-0.350834	0.0927845	0.521834	0.00891145	-0.421795	0.0400744	-0.400749	0.0522971	0.292119	0.166016	0.180563	0.398489	-0.110332	0.607791	0.695017	0.000163699	-0.919233	2.25472e-10	-0.358274	0.0856002	0.288199	0.172034	0.363558	0.0807571	-0.233954	0.271198	0.976263	4.16212e-16	-0.450904	0.0270078	-0.592209	0.00229701	-0.416386	0.0429755	-0.832214	4.60145e-07	0.562469	0.00422261
XLOC_009470	Bra020633	NA	M1	-0.174211	0.41556	-0.20327	0.340767	-0.193057	0.366082	-0.00235194	0.991298	0.10709	0.618441	0.195315	0.360392	0.0771133	0.720236	-0.195379	0.360232	0.537504	0.00675355	-0.447742	0.0282347	0.243231	0.252094	-0.401396	0.0518822	-0.433537	0.0343082	0.363317	0.0809731	0.586458	0.00259564	-0.0151027	0.94416	0.584407	0.00270988	-0.337504	0.106767	-0.31284	0.136637	0.00606551	0.97756	-0.695993	0.000158841	0.567721	0.00380763
XLOC_009507	Bra020549	NA	M1	-0.0322793	0.880976	-0.0742598	0.730205	-0.0654478	0.761252	0.173164	0.418411	-0.0835738	0.697831	-0.159268	0.457263	-0.0745027	0.729354	0.162199	0.448914	0.0984702	0.64712	-0.173849	0.416546	0.0866458	0.687261	-0.446119	0.0288816	-0.412805	0.0449852	0.396418	0.0551376	0.0436214	0.839613	-0.226878	0.286372	0.401845	0.0515961	-0.669401	0.000347106	0.00744085	0.972473	-0.253518	0.231958	-0.43355	0.0343022	0.345202	0.0985149
XLOC_009552	Bra020464	AT5G24610	M1	0.175251	0.412738	0.309899	0.140561	0.225288	0.289852	-0.123859	0.564199	0.0721665	0.737545	-0.143984	0.502075	-0.328147	0.117472	0.173672	0.417026	0.15913	0.457657	-0.128973	0.548092	0.425894	0.0379807	-0.371132	0.0741804	0.00966669	0.964243	-0.273504	0.195946	0.242619	0.253327	-0.445249	0.0292331	0.336327	0.108072	0.323296	0.123318	-0.0519591	0.809462	-0.587498	0.00253934	-0.294107	0.163019	-0.330122	0.11515
XLOC_009559	Bra029402	NA	M1	-0.0292565	0.892055	-0.044271	0.837256	-0.0635193	0.768097	0.0477665	0.824593	-0.00364511	0.986513	0.0434812	0.840122	0.0691313	0.748227	0.0811581	0.706181	0.241105	0.256393	-0.0315852	0.883518	0.056303	0.793854	-0.115835	0.589887	-0.176832	0.408466	0.0143959	0.94677	0.116164	0.588824	-0.25315	0.232661	0.172333	0.420683	-0.0802696	0.709261	0.193432	0.365133	0.0297511	0.890241	-0.1939	0.363952	0.132059	0.538473
XLOC_009625	Bra029289	NA	M1	0.606714	0.00167042	0.663768	0.000405641	0.648464	0.000609775	-0.463495	0.0225393	0.551001	0.00526245	-0.547616	0.00560753	-0.623182	0.00114172	0.424882	0.0384895	-0.0688169	0.749337	0.102219	0.634583	0.850108	1.45322e-07	-0.856695	9.1545e-08	0.00193847	0.992827	-0.0847843	0.693659	0.265321	0.2102	-0.287205	0.173586	0.822935	7.9454e-07	-0.264512	0.211644	-0.523938	0.00859211	-0.313001	0.136423	-0.574679	0.00331128	0.376948	0.0694124
XLOC_009636	Bra029274,Bra029275	NA	M1	0.462767	0.0227803	0.483975	0.0165608	0.478618	0.0179823	-0.306905	0.144638	0.453463	0.0260463	-0.510523	0.0108013	-0.569042	0.00370883	0.398444	0.053794	0.00647646	0.97604	-0.0852523	0.692049	0.765947	1.28474e-05	-0.941824	6.79208e-12	-0.209472	0.325917	0.154243	0.471759	0.303373	0.149557	-0.319449	0.128104	0.890332	5.6808e-09	-0.537109	0.00680196	-0.545177	0.00586788	-0.445319	0.0292049	-0.723121	6.54603e-05	0.444537	0.0295233
XLOC_009643	Bra029259	AT5G62460	M1	0.579729	0.00298636	0.55399	0.00497262	0.581698	0.0028672	-0.334789	0.109797	0.514834	0.0100454	-0.641131	0.000735598	-0.595584	0.00213575	0.535898	0.00695236	-0.0665232	0.757443	0.116709	0.587063	0.772655	9.65392e-06	-0.981157	3.35852e-17	-0.197801	0.354189	0.091034	0.672261	0.145147	0.498591	-0.429626	0.0361504	0.907128	9.89013e-10	-0.537459	0.00675899	-0.362836	0.0814062	-0.440428	0.0312439	-0.672632	0.000316966	0.450642	0.0271079
XLOC_009680	Bra029198	NA	M1	0.17082	0.424834	0.160219	0.454546	0.15666	0.464758	-0.244691	0.24917	0.29357	0.163825	-0.288984	0.170817	-0.184417	0.388325	0.181687	0.395508	0.405577	0.0492656	-0.200562	0.347374	0.496074	0.0136851	-0.867352	4.12126e-08	-0.601836	0.00186242	0.420341	0.0408388	0.34924	0.0943802	-0.392353	0.0579114	0.96368	4.22516e-14	-0.415222	0.0436209	-0.406378	0.0487758	-0.574842	0.00330033	-0.932537	3.31601e-11	0.476559	0.0185545
XLOC_009683	Bra032026	AT3G02960	M1	0.0171116	0.936746	0.0858084	0.690137	0.0638831	0.766804	-0.203971	0.339068	0.251622	0.235589	0.148392	0.488933	0.0337119	0.875732	-0.326408	0.119544	0.247238	0.244121	-0.122495	0.568529	0.232482	0.27431	-0.0734869	0.732912	0.0418003	0.84623	0.00594194	0.978017	0.420216	0.040905	0.366999	0.0777165	0.24354	0.251474	0.163682	0.444721	-0.451133	0.0269206	0.266291	0.208473	-0.245077	0.2484	0.334888	0.109684
XLOC_009688	Bra032018,Bra032019	NA	M1	0.436402	0.0330064	0.325851	0.120214	0.356275	0.0874877	-0.326894	0.118961	0.446138	0.028874	-0.572037	0.00349288	-0.222234	0.296614	0.610469	0.00153435	0.00926732	0.965719	0.326533	0.119393	0.356515	0.0872595	-0.709634	0.000102967	-0.416588	0.0428642	0.257998	0.223531	-0.191481	0.370084	-0.520351	0.00914238	0.69966	0.000141695	-0.430098	0.0359242	-0.0714563	0.740041	-0.394211	0.0566311	-0.509795	0.0109334	0.358363	0.0855168
XLOC_009689	Bra032016,Bra032017	NA	M1	0.0635503	0.767986	0.0822883	0.70227	0.0827207	0.700776	-0.184882	0.387109	0.23637	0.266136	-0.0514537	0.811282	-0.0147174	0.945583	-0.0483877	0.822347	0.33509	0.109458	-0.108017	0.615386	0.261023	0.217958	-0.326463	0.119477	-0.23635	0.266178	0.0784959	0.715422	0.243974	0.250605	-0.127327	0.553251	0.464591	0.0221805	0.257628	0.22422	-0.245449	0.247661	-0.344313	0.0994432	-0.448753	0.0278376	0.0756437	0.725365
XLOC_009691	Bra032012	AT3G03160	M1	-0.223277	0.294294	-0.278719	0.187215	-0.268224	0.205065	-0.0561416	0.794433	0.0800713	0.709949	0.148421	0.488848	0.365582	0.0789579	-0.199145	0.350862	0.742814	3.21875e-05	-0.245855	0.246854	0.0162366	0.939975	-0.392044	0.0581266	-0.762374	1.49034e-05	0.540278	0.00642122	0.350719	0.092899	-0.218397	0.305245	0.654091	0.000526266	-0.134057	0.532291	-0.158851	0.458455	-0.280451	0.184376	-0.796175	3.26981e-06	0.452931	0.026244
XLOC_009730	Bra031945,Bra031946,Bra031947	NA	M1	0.142118	0.507688	0.256989	0.225411	0.185425	0.385691	-0.232049	0.27523	0.0749476	0.727798	-0.126276	0.556559	-0.402137	0.0514107	0.114718	0.593503	0.239429	0.259815	-0.342613	0.101236	0.579956	0.00297238	-0.653057	0.000540823	-0.186393	0.383171	-0.0600333	0.780511	0.506129	0.0116195	-0.50549	0.0117426	0.605438	0.00171892	-0.323642	0.122895	-0.227499	0.285018	-0.368566	0.0763614	-0.633889	0.000881233	0.180213	0.399419
XLOC_009785	Bra031866	AT5G65310	M1	0.435691	0.0333259	0.357836	0.0860112	0.393267	0.0572785	-0.618845	0.00126462	0.557636	0.00463742	-0.422729	0.0395896	-0.218156	0.305792	0.336204	0.10821	0.0602717	0.77966	0.30739	0.143973	0.420995	0.0404938	-0.532991	0.00732467	-0.190901	0.371562	-0.0181448	0.932935	-0.0197587	0.926985	-0.424297	0.0387859	0.570338	0.00361402	0.0315346	0.883703	-0.20168	0.344637	-0.330844	0.114309	-0.406034	0.0489856	0.147978	0.490159
XLOC_009821	Bra031808	AT5G66240	M1	-0.160132	0.454792	-0.0217464	0.919662	-0.143113	0.50469	0.110998	0.60561	-0.290722	0.168143	0.0728697	0.735077	-0.155539	0.467998	0.156337	0.465689	0.29407	0.163075	-0.480059	0.0175907	0.200827	0.346725	-0.344856	0.0988761	-0.295008	0.161675	0.0979515	0.648862	0.336891	0.107446	-0.466368	0.0216088	0.318189	0.1297	-0.204278	0.338327	0.064432	0.764855	-0.453651	0.0259771	-0.42938	0.0362688	-0.0699102	0.745482
XLOC_009828	Bra005659,Bra005660	NA	M1	-0.373951	0.0718388	-0.149203	0.486534	-0.307664	0.143597	0.151574	0.479556	-0.435044	0.0336182	0.286089	0.175337	0.0225817	0.916586	-0.179286	0.401888	0.546052	0.00577336	-0.639315	0.000770021	0.153972	0.472547	-0.313584	0.135655	-0.409939	0.0466461	0.221149	0.299038	0.576927	0.00316312	-0.286983	0.173933	0.40796	0.0478204	-0.258636	0.222348	0.0300075	0.889301	-0.265409	0.210042	-0.595745	0.00212833	0.211342	0.321517
XLOC_009836	Bra005677	AT5G01600	M1	0.408877	0.0472734	0.329143	0.116297	0.359439	0.0845138	-0.409102	0.0471399	0.462835	0.0227578	-0.470496	0.020326	-0.281064	0.183378	0.366385	0.0782526	0.201787	0.344377	0.144641	0.500105	0.538625	0.00661758	-0.829126	5.53845e-07	-0.412018	0.0454369	0.173102	0.418581	0.120714	0.574207	-0.542847	0.00612589	0.852442	1.2369e-07	-0.327256	0.11853	-0.241943	0.254693	-0.485817	0.0160936	-0.723823	6.38894e-05	0.358279	0.0855952
XLOC_009853	Bra005704	AT5G02040	M1	-0.149521	0.485595	0.00381074	0.9859	-0.117263	0.58528	-0.23192	0.275505	-0.115602	0.590642	0.186003	0.384185	0.0915677	0.670445	-0.0502551	0.815604	0.305476	0.146615	-0.149999	0.484185	0.0849569	0.693065	-0.0548516	0.79906	-0.145934	0.496239	-0.0249846	0.907746	0.315318	0.13339	-0.223473	0.293859	0.170832	0.424803	-0.0650312	0.762729	0.126958	0.554411	0.195027	0.361117	-0.214848	0.313366	0.258442	0.222707
XLOC_009877	Bra005744	AT5G03030	M1	0.421675	0.0401369	0.422667	0.0396219	0.419389	0.0413451	-0.410023	0.0465967	0.429988	0.0359769	-0.409589	0.0468519	-0.412079	0.0454014	0.307533	0.143776	0.0304264	0.887764	0.0490845	0.81983	0.648871	0.00060338	-0.808827	1.7214e-06	-0.209924	0.324851	0.165806	0.438754	0.301673	0.151966	-0.243672	0.251209	0.803101	2.3144e-06	-0.728028	5.51572e-05	-0.416581	0.0428685	0.00934342	0.965438	-0.650963	0.000571382	0.744693	2.99815e-05
XLOC_009878	Bra005745	AT5G02960	M1	0.10481	0.625977	0.0876033	0.683978	0.0968759	0.65248	-0.190133	0.373526	0.312937	0.136508	-0.219679	0.302344	-0.0888434	0.679735	0.0606478	0.778319	0.414455	0.0440505	-0.239307	0.260066	0.421038	0.0404712	-0.778627	7.4246e-06	-0.599777	0.00194893	0.545348	0.00584922	0.364948	0.0795188	-0.105337	0.624232	0.937736	1.40646e-11	-0.400681	0.0523407	-0.538951	0.00657841	-0.432867	0.0346182	-0.906836	1.02236e-09	0.610155	0.00154537
XLOC_009903	Bra005798	AT5G04280	M1	0.408171	0.0476945	0.363056	0.0812086	0.387385	0.0614467	-0.0738679	0.731577	0.439212	0.0317683	-0.474351	0.0191845	-0.296485	0.159487	0.2568	0.225764	-0.135721	0.527167	0.143812	0.502591	0.417824	0.0421888	-0.615947	0.00135294	-0.144462	0.500641	0.325985	0.120052	0.0119034	0.955976	0.189307	0.375643	0.606434	0.00168094	-0.552503	0.00511512	-0.568421	0.00375501	-0.0822588	0.702372	-0.420231	0.040897	0.573285	0.00340605
XLOC_009912	Bra005817	AT5G04750	M1	0.157139	0.463375	0.156031	0.466575	0.142292	0.507165	-0.289228	0.17044	0.244732	0.249088	-0.0975601	0.650178	0.0269104	0.900668	0.159004	0.458018	0.113369	0.597882	0.24119	0.25622	0.159689	0.456058	-0.158657	0.459012	-0.0818104	0.703923	-0.00103488	0.996171	0.0366378	0.865039	-0.0945295	0.660399	0.274125	0.194893	-0.0681296	0.751763	0.0583582	0.786496	0.272498	0.197663	-0.156052	0.466515	0.396245	0.055254
XLOC_009914	Bra005820	NA	M1	0.157601	0.462046	0.142906	0.505315	0.15876	0.458716	-0.229795	0.280052	0.377509	0.0689653	-0.239892	0.258867	-0.160576	0.453527	0.0917526	0.669817	0.294794	0.161994	-0.203381	0.340496	0.479069	0.0178591	-0.787785	4.88553e-06	-0.511728	0.0105853	0.516147	0.00982407	0.402678	0.0510685	-0.0625699	0.771472	0.91154	5.9137e-10	-0.64818	0.000614272	-0.590903	0.00236212	-0.192411	0.367719	-0.857876	8.40629e-08	0.793914	3.65002e-06
XLOC_009933	Bra005854	AT5G05460	M1	0.193953	0.363818	0.0931183	0.665179	0.116636	0.587301	0.0474398	0.825775	-0.00280202	0.989632	-0.389736	0.059754	-0.103928	0.628901	0.540167	0.00643423	0.116595	0.587431	0.18704	0.381492	0.103952	0.628823	-0.481551	0.0171923	-0.430716	0.0356295	0.109193	0.611522	-0.283061	0.180152	-0.762814	1.46355e-05	0.402609	0.0511124	-0.180562	0.39849	0.458221	0.0243321	-0.626212	0.00106204	-0.34122	0.102722	-0.112555	0.600531
XLOC_009945	Bra005881	NA	M1	0.412565	0.0451227	0.431904	0.035068	0.417702	0.0422552	-0.348983	0.0946399	0.457376	0.02463	-0.478372	0.0180501	-0.460607	0.0235075	0.400642	0.0523657	0.146234	0.495344	-0.0637449	0.767295	0.719955	7.29719e-05	-0.955259	4.02709e-13	-0.343077	0.100744	0.206802	0.332261	0.310717	0.139461	-0.384209	0.0637921	0.969976	5.35914e-15	-0.479382	0.0177737	-0.435842	0.0332578	-0.448901	0.0277801	-0.80939	1.67112e-06	0.508595	0.0111542
XLOC_009950	Bra005887	NA	M1	-0.0970791	0.651796	0.00593524	0.978041	-0.0565894	0.792827	-0.155128	0.469188	0.0818913	0.703643	0.0529707	0.805821	-0.000486622	0.998199	-0.162829	0.447132	0.558641	0.00454844	-0.444746	0.0294381	0.381173	0.0660977	-0.589379	0.00244009	-0.513135	0.0103379	0.449918	0.0273857	0.582936	0.00279436	-0.00083209	0.996921	0.809506	1.66095e-06	-0.236484	0.2659	-0.52775	0.00803788	-0.262322	0.215592	-0.858271	8.16888e-08	0.586531	0.00259165
XLOC_009963	Bra005918,Bra005919	NA	M1	0.183968	0.3895	0.163868	0.444199	0.176125	0.410373	-0.199883	0.349044	0.327759	0.117931	-0.309568	0.141008	-0.214536	0.314086	0.453519	0.0260256	0.144494	0.500545	-0.0784591	0.71555	0.378225	0.0683974	-0.614841	0.001388	-0.39612	0.0553379	0.271243	0.199816	0.0920044	0.66896	-0.414207	0.04419	0.662513	0.000419787	-0.22421	0.292229	-0.206228	0.333635	-0.504437	0.0119479	-0.554444	0.00492986	0.224152	0.292356
XLOC_009965	Bra005923	NA	M1	0.135548	0.527699	0.0713694	0.740346	0.107397	0.617429	-0.189594	0.374906	0.395823	0.0555371	-0.286311	0.174988	-0.0888999	0.679541	0.110764	0.606375	0.365776	0.0787869	-0.184086	0.389192	0.391422	0.0585622	-0.800563	2.63088e-06	-0.635386	0.000849248	0.586851	0.00257427	0.279921	0.185241	-0.128442	0.549752	0.938265	1.2835e-11	-0.431893	0.0350733	-0.54576	0.00580468	-0.510274	0.0108464	-0.897302	2.85276e-09	0.571071	0.00356131
XLOC_009997	Bra005986	AT5G08340	M1	-0.320484	0.126803	-0.292234	0.165841	-0.339806	0.104248	-0.012074	0.955346	-0.0762769	0.723154	0.198657	0.352068	0.274341	0.194527	-0.19784	0.354092	0.636301	0.000830202	-0.459801	0.0237835	0.0549815	0.798594	-0.37356	0.07216	-0.673553	0.000308803	0.649344	0.000596005	0.436557	0.0329371	0.0322427	0.88111	0.638239	0.000791053	-0.298382	0.156707	-0.309485	0.14112	-0.163687	0.444707	-0.765353	1.31709e-05	0.590932	0.00236065
XLOC_010024	Bra006042	AT5G10010	M1	0.380004	0.0670026	0.478939	0.0178945	0.458385	0.0242748	-0.265381	0.210092	0.342346	0.10152	-0.252585	0.23374	-0.473223	0.0195132	0.155885	0.466997	0.00123705	0.995423	-0.0638523	0.766914	0.697364	0.000152229	-0.543137	0.00609318	0.142501	0.506535	-0.151879	0.478659	0.375392	0.070664	-0.0528678	0.806191	0.548671	0.00549805	-0.0794335	0.712163	-0.520668	0.00909256	-0.0878367	0.683179	-0.394684	0.0563083	0.294801	0.161984
XLOC_010043	Bra006076	AT5G10745	M1	0.0717925	0.738859	0.0046748	0.982704	0.070149	0.744641	-0.326672	0.119228	0.282379	0.18125	-0.0927047	0.666582	-0.0570523	0.791169	0.0202282	0.925255	-0.113737	0.596687	0.00972138	0.964041	0.0614842	0.775338	-0.0800442	0.710043	-0.04179	0.846267	0.141071	0.510853	-0.0193114	0.928634	0.0985042	0.647006	0.0996018	0.643326	-0.0123458	0.954342	-0.353608	0.0900549	-0.108026	0.615359	-0.0647086	0.763873	0.0538555	0.802639
XLOC_010046	Bra006080	NA	M1	0.0223642	0.917387	-0.0119891	0.95566	-0.0181893	0.932771	-0.00901265	0.966661	0.100244	0.641177	-0.225728	0.288886	-0.0533288	0.804533	0.24077	0.257076	0.0275654	0.898262	-0.0614048	0.77562	0.042816	0.842538	-0.384683	0.0634378	-0.400747	0.0522984	0.360234	0.0837787	-0.0614214	0.775561	-0.301893	0.151652	0.337425	0.106855	-0.542553	0.00615902	-0.0671299	0.755296	-0.321423	0.125632	-0.350512	0.0931051	0.213087	0.317443
XLOC_010050	Bra006085	AT5G11060	M1	0.169799	0.427649	0.142357	0.506967	0.153877	0.472826	-0.0956513	0.656609	0.224165	0.292326	-0.24269	0.253185	-0.118694	0.580675	0.143891	0.502354	0.446445	0.0287509	-0.138312	0.519235	0.456775	0.0248433	-0.815185	1.22471e-06	-0.582748	0.00280534	0.386247	0.0622796	0.340925	0.10304	-0.369943	0.0751844	0.91759	2.79206e-10	-0.473862	0.0193264	-0.285399	0.176427	-0.381336	0.0659724	-0.898463	2.53135e-09	0.575603	0.00324971
XLOC_010051	Bra006087	NA	M1	0.0976561	0.649855	-0.176975	0.408081	-0.0130148	0.951871	-0.0117408	0.956577	0.317684	0.130344	-0.13253	0.537014	0.235189	0.268603	0.0194589	0.92809	0.176185	0.410212	0.262843	0.21465	-0.102271	0.634412	-0.142566	0.506337	-0.341715	0.102193	0.321523	0.125508	-0.175313	0.41257	0.0361993	0.866641	0.237555	0.263676	-0.0751023	0.727257	-0.0615543	0.775088	-0.0415493	0.847142	-0.221027	0.299312	0.24434	0.249872
XLOC_010060	Bra006107	AT5G11670	M1	0.253658	0.231692	0.222991	0.294928	0.230588	0.278351	-0.253448	0.232091	0.360028	0.0839687	-0.361607	0.0825204	-0.184679	0.387639	0.310623	0.139588	0.361276	0.0828225	-0.045163	0.834021	0.48906	0.0152974	-0.843423	2.27272e-07	-0.567238	0.00384424	0.342311	0.101557	0.220909	0.299576	-0.486201	0.0159976	0.932619	3.27321e-11	-0.321866	0.125082	-0.279193	0.186435	-0.571021	0.00356489	-0.85221	1.25703e-07	0.411995	0.0454499
XLOC_010067	Bra006116	AT5G11750	M1	0.11318	0.598495	0.076864	0.721105	0.0855279	0.691101	-0.219172	0.30349	0.277367	0.189452	-0.246912	0.244763	-0.0963338	0.654306	0.16365	0.444812	0.408293	0.0476212	-0.192714	0.36695	0.409062	0.0471639	-0.800001	2.70603e-06	-0.634666	0.000864495	0.52083	0.00906717	0.312942	0.136501	-0.265944	0.20909	0.934668	2.3529e-11	-0.474171	0.0192366	-0.387564	0.0613166	-0.436626	0.0329064	-0.900179	2.11601e-09	0.600942	0.00189956
XLOC_010070	Bra006125	AT5G11890	M1	-0.244059	0.250434	-0.206716	0.332467	-0.220947	0.299492	-0.151019	0.481185	0.1205	0.57489	0.270335	0.201386	0.263773	0.212972	-0.514599	0.0100854	0.471321	0.0200773	-0.379977	0.0670237	0.0474379	0.825782	-0.188316	0.378193	-0.418047	0.0420674	0.476848	0.0184735	0.525814	0.00831553	0.302814	0.150345	0.405645	0.0492238	-0.2626	0.215089	-0.674854	0.000297579	0.088069	0.682384	-0.574969	0.00329188	0.565564	0.00397368
XLOC_010103	Bra006196	NA	M1	0.149944	0.484347	0.141499	0.509557	0.132926	0.535788	0.010249	0.96209	0.201364	0.345411	-0.293793	0.16349	-0.144971	0.499117	0.405169	0.0495163	0.291676	0.166688	-0.109799	0.609536	0.391218	0.058705	-0.728867	5.35465e-05	-0.528254	0.0079669	0.44588	0.0289778	0.164534	0.442324	-0.310276	0.140053	0.829343	5.46755e-07	-0.456597	0.0249068	-0.184429	0.388295	-0.375605	0.0704919	-0.726433	5.83365e-05	0.529269	0.00782542
XLOC_010105	Bra006203	AT5G13490	M1	0.322889	0.123818	0.42658	0.037639	0.34953	0.0940883	-0.475223	0.0189337	0.399679	0.0529878	-0.276301	0.191229	-0.41311	0.044811	0.314295	0.134724	0.131653	0.539734	-0.0943288	0.661078	0.652008	0.000555947	-0.671473	0.000327502	-0.141017	0.511016	-0.0493752	0.81878	0.392088	0.0580963	-0.463478	0.0225452	0.67241	0.000318961	-0.295768	0.160546	-0.360535	0.0835018	-0.230385	0.278786	-0.57846	0.00306536	0.315454	0.133215
XLOC_010117	Bra006226	AT5G13960	M1	0.268825	0.204014	0.319682	0.12781	0.291025	0.167681	-0.330225	0.115029	0.38331	0.0644685	-0.286674	0.174417	-0.372596	0.0729569	0.200981	0.346348	0.310214	0.140137	-0.24572	0.247122	0.701687	0.000132931	-0.881944	1.22732e-08	-0.364583	0.0798421	0.221601	0.298028	0.505665	0.0117088	-0.308007	0.143129	0.958491	1.79196e-13	-0.384925	0.0632575	-0.5165	0.00976516	-0.398156	0.0539835	-0.876911	1.896e-08	0.521974	0.00888991
XLOC_010121	Bra006233	AT5G14030	M1	0.507834	0.0112962	0.549655	0.00539747	0.510978	0.0107194	-0.63328	0.000894544	0.575867	0.00323228	-0.527695	0.00804564	-0.402361	0.0512688	0.448197	0.0280555	-0.185694	0.38499	0.294301	0.162729	0.539084	0.00656254	-0.639975	0.000757352	-0.0923535	0.667774	0.0387209	0.85744	0.0252098	0.906917	-0.268716	0.204204	0.609287	0.00157611	-0.490416	0.0149741	-0.365636	0.0789106	-0.0198142	0.926781	-0.383289	0.0644842	0.514701	0.010068
XLOC_010136	Bra006264	AT5G14710	M1	-0.092201	0.668292	-0.275619	0.192373	-0.139397	0.515931	0.288751	0.171178	0.0780597	0.716939	-0.0726736	0.735765	0.297928	0.157369	-0.137075	0.523015	0.290566	0.168383	-0.0270951	0.899989	-0.161125	0.451963	-0.26228	0.215668	-0.569083	0.00370581	0.635432	0.000848284	-0.0718334	0.738715	0.146968	0.493159	0.379384	0.067486	-0.277821	0.188699	-0.24948	0.239731	-0.295559	0.160856	-0.439516	0.0316367	0.340827	0.103145
XLOC_010153	Bra006291	AT5G15230	M1	-0.211346	0.321508	-0.221775	0.297639	-0.231961	0.275418	-0.0112323	0.958456	0.0524779	0.807594	0.194164	0.363287	0.186321	0.383359	-0.369326	0.07571	0.710983	9.85142e-05	-0.470043	0.0204637	0.171746	0.42229	-0.430639	0.035666	-0.589551	0.00243117	0.425862	0.0379965	0.562643	0.00420824	-0.0617275	0.774471	0.633867	0.0008817	-0.0542704	0.801148	-0.439073	0.0318287	-0.386744	0.0619146	-0.823156	7.84563e-07	0.301658	0.151987
XLOC_010163	Bra006308,Bra006309,Bra006312,Bra006313	NA	M1	0.317453	0.130639	0.286489	0.174707	0.304631	0.147792	-0.201258	0.345669	0.390599	0.0591416	-0.388293	0.0607884	-0.324924	0.121333	0.205997	0.334189	0.210423	0.323675	-0.111907	0.602643	0.588653	0.00247801	-0.896463	3.10715e-09	-0.421302	0.0403323	0.353106	0.0905439	0.326424	0.119525	-0.227894	0.28416	0.92501	1.02429e-10	-0.606925	0.00166248	-0.506666	0.0115169	-0.365011	0.0794623	-0.838745	3.07052e-07	0.608036	0.00162138
XLOC_010167	Bra006314	AT5G15640	M1	0.351906	0.0917221	0.33488	0.109694	0.345579	0.0981231	-0.346656	0.0970109	0.402548	0.0511511	-0.401932	0.0515409	-0.363888	0.0804615	0.271949	0.198602	0.180399	0.398925	-0.0435162	0.839995	0.626371	0.00105799	-0.900488	2.04802e-09	-0.385791	0.0626158	0.245637	0.247287	0.322226	0.124636	-0.394353	0.0565336	0.912433	5.31121e-10	-0.639571	0.000765076	-0.37405	0.0717579	-0.297863	0.157464	-0.80923	1.68524e-06	0.619529	0.00124451
XLOC_010174	Bra006323	AT5G15810	M1	0.606979	0.00166047	0.584782	0.00268867	0.607262	0.00164993	-0.454048	0.0258307	0.586224	0.00260849	-0.644417	0.000676695	-0.62208	0.00117194	0.53872	0.00660615	-0.113147	0.598602	0.135635	0.527431	0.794445	3.55739e-06	-0.973735	1.25243e-15	-0.165551	0.439466	0.0524909	0.807547	0.167211	0.43483	-0.470666	0.0202746	0.88148	1.27862e-08	-0.596727	0.00208337	-0.416897	0.0426944	-0.382842	0.0648226	-0.651341	0.000565759	0.465973	0.0217347
XLOC_010186	Bra006340	AT5G16130	M1	0.21764	0.306967	0.122687	0.567918	0.19351	0.364936	-0.191225	0.370734	0.468285	0.021005	-0.306787	0.144802	-0.125056	0.560408	0.0778974	0.717504	0.192711	0.366958	-0.0805979	0.708122	0.408116	0.0477271	-0.726782	5.76283e-05	-0.463606	0.022503	0.575943	0.00322726	0.251673	0.235489	0.135285	0.528506	0.851425	1.32737e-07	-0.592076	0.00230357	-0.671055	0.000331386	-0.168581	0.431019	-0.758355	1.75597e-05	0.782113	6.34588e-06
XLOC_010208	Bra006380	AT5G16950	M1	0.453103	0.02618	0.295196	0.161395	0.393567	0.0570721	-0.439373	0.0316983	0.689989	0.000190837	-0.510112	0.0108756	-0.216311	0.310003	0.295211	0.161374	0.0551614	0.797948	0.253305	0.232365	0.45033	0.0272273	-0.717623	7.89768e-05	-0.34131	0.102626	0.308847	0.141984	0.00255213	0.990557	-0.140485	0.512628	0.783502	5.95636e-06	-0.260412	0.219076	-0.502963	0.0122402	-0.375814	0.0703231	-0.59496	0.00216482	0.43785	0.0323635
XLOC_010209	Bra006382	AT5G17020	M1	0.354772	0.0889277	0.329789	0.115539	0.340091	0.103939	-0.152057	0.478139	0.365417	0.0791039	-0.507069	0.0114403	-0.379124	0.0676901	0.391021	0.0588439	-0.0892411	0.678376	0.0170408	0.937008	0.43619	0.0331013	-0.701437	0.000133985	-0.258693	0.222243	0.230698	0.278114	-0.00824316	0.969506	-0.2824	0.181215	0.618275	0.00128159	-0.409135	0.0471205	-0.370654	0.0745831	-0.569331	0.00368754	-0.487173	0.0157567	0.173536	0.417397
XLOC_010241	Bra006463	AT5G18500	M1	0.359892	0.0840944	0.325546	0.120581	0.32707	0.118751	-0.195541	0.359827	0.171494	0.422983	-0.504533	0.011929	-0.40047	0.0524764	0.493349	0.0142942	0.0370995	0.863354	0.0506067	0.814336	0.436405	0.0330052	-0.724527	6.23482e-05	-0.30129	0.152511	0.0283888	0.895239	-0.0559687	0.795052	-0.693504	0.000171486	0.604974	0.00173687	-0.154123	0.472109	0.00546791	0.97977	-0.833646	4.21703e-07	-0.506942	0.0114644	-0.143268	0.504224
XLOC_010256	Bra006481	AT5G18800	M1	0.159811	0.45571	0.0807836	0.707479	0.13452	0.530864	-0.115984	0.589407	0.3521	0.0915313	-0.157042	0.463656	0.0425084	0.843656	0.0874231	0.684596	0.0793987	0.712284	0.109938	0.609081	0.189129	0.376101	-0.366988	0.0777259	-0.284091	0.178504	0.431041	0.035475	0.10611	0.621676	0.184247	0.388771	0.48485	0.0163375	-0.660947	0.000438041	-0.38991	0.0596297	0.386201	0.0623135	-0.397509	0.0544112	0.869162	3.57436e-08
XLOC_010257	Bra006482	AT5G18850	M1	-0.167125	0.435069	-0.277465	0.18929	-0.22141	0.298454	0.417199	0.0425294	-0.134378	0.531299	0.0751614	0.72705	0.259585	0.220596	0.0826694	0.700953	0.358741	0.0851636	-0.0608563	0.777576	-0.153996	0.472479	-0.0863099	0.688414	-0.387629	0.0612692	0.326117	0.119893	-0.0576182	0.789143	-0.121535	0.571587	0.203426	0.340389	-0.00139452	0.99484	0.230419	0.278713	-0.193241	0.365617	-0.252424	0.234048	0.0949055	0.659128
XLOC_010258	Bra006484	AT5G18920	M1	0.35269	0.0909514	0.156566	0.465028	0.28154	0.182606	-0.140969	0.511163	0.487165	0.0157586	-0.380265	0.0667997	-0.153229	0.474713	0.239914	0.258822	0.209857	0.325007	0.163934	0.444011	0.403179	0.0507534	-0.684991	0.00022162	-0.386852	0.0618355	0.267454	0.206418	0.072317	0.737016	-0.274613	0.194067	0.728193	5.48372e-05	-0.306253	0.145538	-0.282104	0.181693	-0.343908	0.099868	-0.633637	0.000886719	0.387278	0.0615243
XLOC_010276	Bra006514	AT5G19690	M1	0.521509	0.00896167	0.541547	0.00627392	0.530417	0.00766802	-0.419305	0.0413903	0.471803	0.019933	-0.559809	0.0044469	-0.582205	0.00283719	0.471132	0.020134	0.0435127	0.840008	0.009455	0.965026	0.795659	3.35326e-06	-0.976658	3.46764e-16	-0.226736	0.28668	0.0498373	0.817112	0.258115	0.223314	-0.505338	0.011772	0.924489	1.10267e-10	-0.407436	0.0481352	-0.408032	0.0477774	-0.53683	0.0068364	-0.737549	3.91492e-05	0.348713	0.0949125
XLOC_010277	Bra006515	AT5G19750	M1	0.0339405	0.874896	-0.0974825	0.650439	-0.0320506	0.881813	0.0703744	0.743847	0.208044	0.329301	-0.233872	0.27137	0.0118464	0.956187	0.105266	0.624467	0.421721	0.0401131	-0.201177	0.345868	0.200886	0.346579	-0.665142	0.000390623	-0.669704	0.000344179	0.5704	0.00360953	0.128421	0.549818	-0.195053	0.361051	0.773465	9.32039e-06	-0.194794	0.361701	-0.288719	0.171228	-0.743112	3.18286e-05	-0.788148	4.80305e-06	0.2314	0.276614
XLOC_010288	Bra006538	AT5G20080	M1	-0.0219793	0.918804	-0.161151	0.451889	-0.10271	0.632948	-0.064572	0.764358	0.158993	0.458051	-0.186101	0.38393	0.187039	0.381496	0.125353	0.55947	0.345615	0.0980863	-0.0627681	0.770767	0.0325096	0.880133	-0.551365	0.00522642	-0.751285	2.32581e-05	0.746996	2.74598e-05	0.0210115	0.922369	-0.114326	0.594774	0.699597	0.000141977	-0.60644	0.00168071	-0.226646	0.286877	-0.253132	0.232694	-0.708054	0.0001084	0.665083	0.000391263
XLOC_010292	Bra006546	AT5G20180	M1	0.254312	0.23045	0.144126	0.501647	0.203934	0.339158	-0.239086	0.26052	0.415781	0.04331	-0.408066	0.0477574	-0.109241	0.611365	0.271381	0.199578	0.307482	0.143847	0.0240493	0.911186	0.388471	0.06066	-0.814185	1.29319e-06	-0.615966	0.00135235	0.485555	0.0161594	0.101016	0.638595	-0.319889	0.12755	0.917802	2.71666e-10	-0.358146	0.0857197	-0.361749	0.0823909	-0.566966	0.00386508	-0.822924	7.95046e-07	0.470175	0.0204235
XLOC_010311	Bra006593	AT5G21090	M1	0.397598	0.054352	0.329996	0.115296	0.366804	0.077887	-0.185448	0.385631	0.314437	0.134539	-0.365186	0.0793073	-0.184423	0.388309	0.323182	0.123459	-0.211479	0.321196	0.433648	0.0342567	0.25053	0.237694	-0.293368	0.164129	0.0578433	0.788337	-0.00652515	0.975859	-0.168669	0.430775	-0.00794071	0.970624	0.271391	0.199562	-0.448195	0.0280562	0.0250759	0.90741	0.389918	0.0596243	-0.0656531	0.760524	0.546402	0.00573588
XLOC_010319	Bra006607,Bra006609	NA	M1	0.356348	0.0874178	0.0420537	0.845309	0.271558	0.199274	-0.0489838	0.820193	0.516772	0.00972017	-0.384106	0.0638694	0.0347981	0.87176	-0.0395455	0.854436	-0.239565	0.259536	0.448009	0.0281294	-0.0235169	0.913144	-0.199209	0.350705	-0.106371	0.620813	0.301247	0.152574	-0.336696	0.107662	0.304907	0.147406	0.157319	0.462858	-0.305764	0.146215	-0.443103	0.0301149	-0.00666713	0.975334	-0.0657018	0.760352	0.28156	0.182573
XLOC_010325	Bra006629	AT5G22650	M1	0.472686	0.0196709	0.435411	0.033452	0.462092	0.0230056	-0.320245	0.127104	0.493663	0.0142229	-0.554313	0.00494216	-0.437408	0.032559	0.435855	0.0332518	0.105003	0.625338	0.0587989	0.78492	0.684286	0.000226295	-0.975311	6.38706e-16	-0.372135	0.0733409	0.238856	0.260991	0.191543	0.369925	-0.421367	0.0402984	0.971475	3.07275e-15	-0.529217	0.00783263	-0.397634	0.0543287	-0.469094	0.0207547	-0.792941	3.82546e-06	0.519643	0.0092544
XLOC_010338	Bra006659	AT5G60460	M1	-0.00209524	0.992247	-0.0990643	0.645128	-0.0451998	0.833887	0.0850687	0.692681	0.126785	0.554956	-0.171285	0.423557	0.190604	0.37232	0.139774	0.514786	0.360746	0.0833078	0.0520657	0.809078	-0.0388503	0.856969	-0.313232	0.13612	-0.541451	0.00628493	0.359439	0.0845135	-0.140741	0.511851	-0.248386	0.241868	0.443205	0.0300729	0.237885	0.262993	0.0206667	0.923639	-0.672103	0.000321744	-0.431036	0.0354772	-0.0750265	0.727522
XLOC_010340	Bra006665	NA	M1	0.452687	0.0263351	0.539747	0.00648379	0.491729	0.0146665	-0.506225	0.0116011	0.519085	0.00934345	-0.445659	0.0290672	-0.541845	0.00623965	0.355307	0.0884134	0.104525	0.626922	-0.0798501	0.710716	0.822119	8.32379e-07	-0.910596	6.6162e-10	-0.186252	0.383538	0.0506039	0.814346	0.40682	0.0485074	-0.365542	0.0789932	0.926017	8.8704e-11	-0.340443	0.103559	-0.547852	0.00558292	-0.396332	0.0551953	-0.749034	2.53868e-05	0.441637	0.0307297
XLOC_010351	Bra006689	AT5G59850	M1	0.343687	0.1001	0.338763	0.105384	0.341534	0.102386	-0.330962	0.114172	0.475878	0.0187472	-0.417115	0.0425753	-0.36185	0.0822996	0.306471	0.145237	0.15371	0.473312	-0.087902	0.682955	0.637803	0.000799723	-0.90543	1.19738e-09	-0.395448	0.0557903	0.355744	0.0879946	0.328245	0.117355	-0.211739	0.320587	0.95867	1.71014e-13	-0.63361	0.000887304	-0.527526	0.00806954	-0.274579	0.194124	-0.818667	1.01089e-06	0.705895	0.000116231
XLOC_010368	Bra006731	NA	M1	0.0728884	0.735011	0.144646	0.50009	0.078083	0.716858	-0.3761	0.0700924	-0.00668334	0.975274	-0.141412	0.509822	-0.18804	0.378907	0.164777	0.441638	0.102882	0.632378	-0.104592	0.626698	0.201505	0.345065	-0.265363	0.210125	-0.143727	0.502845	-0.123915	0.56402	0.060246	0.779752	-0.542226	0.0061962	0.218033	0.306072	0.28965	0.16979	-0.029078	0.89271	-0.697395	0.000152084	-0.23518	0.268621	-0.438155	0.0322296
XLOC_010370	Bra006736	NA	M1	0.256659	0.226029	0.331593	0.113442	0.282588	0.180913	-0.306233	0.145566	0.315801	0.132765	-0.233299	0.272579	-0.349826	0.0937916	0.174206	0.415573	0.301307	0.152488	-0.237328	0.264146	0.677804	0.000273435	-0.821585	8.58e-07	-0.324701	0.121604	0.182061	0.39452	0.525315	0.00838837	-0.319994	0.127418	0.880086	1.44432e-08	-0.473937	0.0193045	-0.520656	0.00909452	-0.242877	0.252807	-0.827992	5.92327e-07	0.569838	0.00365036
XLOC_010398	Bra006787	NA	M1	0.532533	0.00738484	0.54691	0.00568188	0.529642	0.00777405	-0.468189	0.021035	0.548687	0.00549641	-0.48142	0.017227	-0.497842	0.0133017	0.471563	0.0200047	-0.0440872	0.837923	0.173113	0.41855	0.662131	0.000424172	-0.670998	0.00033191	-0.0181476	0.932925	-0.180744	0.398008	0.135459	0.527972	-0.413481	0.0446004	0.63327	0.000894757	-0.0771195	0.720214	-0.250992	0.236802	-0.314557	0.134381	-0.425125	0.0383666	0.161852	0.449898
XLOC_010410	Bra006809	AT5G57630	M1	0.270928	0.200361	0.348455	0.0951734	0.299706	0.154787	-0.359508	0.0844495	0.348971	0.0946518	-0.269373	0.203058	-0.378214	0.0684059	0.220729	0.299982	0.330172	0.115091	-0.224844	0.290829	0.709996	0.000101754	-0.866813	4.29776e-08	-0.347136	0.0965183	0.144509	0.500499	0.510525	0.0108009	-0.425091	0.0383837	0.930829	4.33008e-11	-0.346513	0.097158	-0.442588	0.0303298	-0.408731	0.0473606	-0.859271	7.59364e-08	0.457195	0.0246938
XLOC_010435	Bra006857	AT5G56760	M1	-0.187642	0.379935	-0.252281	0.234323	-0.23746	0.263872	-0.18471	0.387559	0.149454	0.485793	0.0715996	0.739537	0.289555	0.169936	-0.0631838	0.769289	0.629995	0.000969316	-0.241865	0.254851	0.0566227	0.792708	-0.4325	0.0347892	-0.751206	2.33297e-05	0.581986	0.0028501	0.295552	0.160866	-0.247831	0.242955	0.678821	0.000265523	-0.199823	0.349191	-0.207695	0.330131	-0.322037	0.124871	-0.773322	9.37853e-06	0.466526	0.0215583
XLOC_010437	Bra006860	AT5G56710	M1	0.585728	0.00263583	0.619632	0.00124152	0.613751	0.00142334	-0.429027	0.0364392	0.585826	0.0026304	-0.588339	0.00249455	-0.630962	0.000946756	0.46149	0.023208	-0.125757	0.558197	0.0765298	0.722271	0.830724	5.0341e-07	-0.923434	1.27806e-10	-0.0703502	0.743932	0.0612973	0.776004	0.254033	0.230979	-0.218134	0.305843	0.875212	2.18648e-08	-0.558137	0.00459293	-0.554839	0.00489281	-0.220726	0.299988	-0.621579	0.0011859	0.577604	0.0031196
XLOC_010453	Bra028940	AT5G56260	M1	-0.21091	0.32253	-0.276006	0.191724	-0.272468	0.197713	-0.0997037	0.642985	0.198842	0.351611	0.129644	0.545994	0.367729	0.077083	-0.18091	0.397566	0.516787	0.00971765	-0.217202	0.307965	-0.0528702	0.806182	-0.296368	0.159658	-0.675282	0.000293963	0.683511	0.000231528	0.298405	0.156673	0.110663	0.606708	0.542346	0.00618259	-0.46995	0.0204919	-0.390753	0.0590323	0.0928127	0.666216	-0.656478	0.000493944	0.732901	4.63635e-05
XLOC_010456	Bra028948,Bra028951,Bra028952	NA	M1	0.516545	0.00975782	0.536923	0.00682491	0.520024	0.00919399	-0.406239	0.0488609	0.522452	0.00881662	-0.623204	0.0011411	-0.566163	0.00392699	0.629224	0.000987636	-0.0843277	0.695232	0.0762365	0.723294	0.718286	7.72267e-05	-0.927248	7.41814e-11	-0.233901	0.27131	0.138935	0.517335	0.111189	0.604987	-0.439621	0.0315913	0.880277	1.42051e-08	-0.487259	0.0157355	-0.350809	0.0928087	-0.474817	0.0190503	-0.632333	0.00091557	0.41212	0.0453777
XLOC_010470	Bra028975	AT5G55510	M1	0.137571	0.521498	0.107526	0.617002	0.131784	0.539328	-0.130112	0.544533	0.405382	0.049385	-0.190867	0.371647	-0.111963	0.602459	0.0383033	0.858963	0.349808	0.0938092	-0.222222	0.296641	0.461595	0.0231726	-0.735858	4.16515e-05	-0.486755	0.01586	0.523192	0.00870433	0.423245	0.0393239	0.0719982	0.738136	0.899086	2.37269e-09	-0.519613	0.00925902	-0.610146	0.00154569	-0.159224	0.457389	-0.844486	2.11969e-07	0.776925	8.00772e-06
XLOC_010531	Bra029090	AT5G53190	M1	-0.214646	0.313831	-0.360591	0.0834505	-0.298377	0.156714	0.290449	0.168561	-0.158066	0.460708	0.0348867	0.871436	0.337544	0.106723	0.159731	0.455939	0.402318	0.051296	-0.0271493	0.89979	-0.241279	0.25604	-0.165698	0.439055	-0.615733	0.00135967	0.413147	0.0447901	-0.132784	0.536226	-0.4484	0.0279758	0.256273	0.226751	-0.230794	0.277909	0.42247	0.0397238	-0.281361	0.182896	-0.350516	0.0931006	0.135955	0.526448
XLOC_010544	Bra029112	AT5G52650	M1	0.226822	0.286493	0.276235	0.191341	0.261617	0.216875	-0.242712	0.25314	0.391691	0.0583737	-0.223205	0.294453	-0.288587	0.171432	0.0491884	0.819454	0.301042	0.152867	-0.255137	0.228889	0.634786	0.000861936	-0.797538	3.05794e-06	-0.338711	0.105441	0.323715	0.122805	0.524002	0.00858262	-0.0336042	0.876126	0.910275	6.87148e-10	-0.40819	0.047683	-0.698815	0.000145493	-0.261342	0.217375	-0.840987	2.66143e-07	0.633648	0.00088648
XLOC_010555	Bra029134	AT5G52190	M1	0.607107	0.00165571	0.684286	0.000226296	0.643808	0.000687293	-0.651652	0.000561158	0.678275	0.00026975	-0.493436	0.0142742	-0.646735	0.000637634	0.523656	0.00863441	-0.185072	0.386613	0.161357	0.451304	0.824626	7.20931e-07	-0.676816	0.000281326	0.177005	0.408001	-0.255198	0.228773	0.24139	0.255815	-0.285359	0.176489	0.643782	0.000687757	-0.126718	0.555165	-0.443088	0.0301213	-0.120599	0.574575	-0.35908	0.0848475	0.289168	0.170532
XLOC_010570	Bra029161	NA	M1	-0.0725349	0.736252	-0.0474435	0.825762	-0.031452	0.884006	0.0770824	0.720344	0.198652	0.352081	0.116645	0.58727	0.0831043	0.699451	-0.181409	0.396246	0.392848	0.0575682	-0.243168	0.252222	0.203329	0.340623	-0.185494	0.385512	-0.17584	0.411145	0.202636	0.342308	0.355429	0.0882958	0.28447	0.177901	0.413656	0.044501	0.310943	0.139158	-0.358968	0.0849519	-0.125716	0.558324	-0.397268	0.0545711	0.22417	0.292315
XLOC_010587	Bra022751,Bra022752	NA	M1	0.35565	0.0880847	0.361442	0.0826706	0.378966	0.0678137	-0.054827	0.799149	0.300549	0.153574	-0.40702	0.0483863	-0.401899	0.0515618	0.412133	0.0453704	-0.301747	0.151861	0.113324	0.598029	0.375494	0.0705813	-0.325405	0.120751	0.173668	0.417038	0.00797798	0.970487	-0.12958	0.546194	0.10245	0.633814	0.278661	0.18731	0.0661316	0.758829	-0.29591	0.160336	-0.324956	0.121295	-0.0289449	0.893198	-0.0373944	0.862278
XLOC_010592	Bra022760	AT5G50810	M1	0.281132	0.183266	0.283384	0.179635	0.281511	0.182652	-0.333948	0.110747	0.433983	0.0341028	-0.315388	0.1333	-0.291258	0.167324	0.206735	0.332422	0.324941	0.121312	-0.144323	0.501056	0.627825	0.00102163	-0.865486	4.76228e-08	-0.427786	0.0370439	0.278238	0.18801	0.411854	0.0455309	-0.299912	0.154489	0.958821	1.64391e-13	-0.378266	0.0683649	-0.48606	0.0160327	-0.388252	0.0608184	-0.872559	2.72068e-08	0.54688	0.00568508
XLOC_010604	Bra022775	AT2G30060	M1	0.521547	0.00895573	0.610437	0.00153548	0.570311	0.00361599	-0.60591	0.00170082	0.548622	0.00550306	-0.365639	0.0789082	-0.534731	0.00709982	0.230595	0.278335	-0.0895022	0.677484	0.115822	0.589931	0.765752	1.29527e-05	-0.614618	0.00139516	0.165974	0.438283	-0.228666	0.282488	0.354575	0.0891173	-0.156479	0.465278	0.599471	0.00196206	-0.255858	0.227532	-0.493205	0.0143268	0.0941621	0.661642	-0.398155	0.0539844	0.459488	0.0238913
XLOC_010635	Bra022829	AT2G31140	M1	0.122056	0.569925	0.298095	0.157126	0.202178	0.343421	-0.323817	0.12268	0.24632	0.245934	-0.0564236	0.793422	-0.327157	0.118648	0.0539648	0.802246	0.332464	0.112439	-0.389564	0.0598766	0.644303	0.000678665	-0.594992	0.00216334	-0.154957	0.469685	0.0324057	0.880513	0.618243	0.00128254	-0.18975	0.374505	0.71247	9.38074e-05	0.00496846	0.981618	-0.533899	0.00720665	-0.333591	0.111152	-0.668381	0.000357128	0.269763	0.202379
XLOC_010642	Bra022843	AT2G31490	M1	0.342234	0.101639	0.282504	0.181048	0.310463	0.139802	-0.266015	0.208965	0.419571	0.0412482	-0.344425	0.0993257	-0.188457	0.377831	0.301222	0.152609	0.0738888	0.731504	0.191793	0.369287	0.342116	0.101765	-0.391611	0.0584293	-0.100655	0.639804	-0.0166098	0.938598	-0.0577483	0.788677	-0.200046	0.348642	0.444766	0.0294298	0.348915	0.0947088	-0.203485	0.340245	-0.502347	0.012364	-0.282311	0.181359	-0.118102	0.582578
XLOC_010647	Bra022851,Bra022859	NA	M1	0.394815	0.0562191	0.379035	0.0677599	0.411779	0.0455744	-0.392246	0.0579865	0.629401	0.000983407	-0.394405	0.0564982	-0.380618	0.0665261	0.200685	0.347074	0.119035	0.579583	-0.04683	0.827982	0.662304	0.000422177	-0.763921	1.39803e-05	-0.200165	0.348351	0.181224	0.396735	0.320122	0.127257	-0.0406509	0.850411	0.847964	1.68124e-07	-0.127647	0.552246	-0.666013	0.000381358	-0.402668	0.0510749	-0.675611	0.000291211	0.401515	0.0518063
XLOC_010653	Bra022864	AT2G31750	M1	-0.0737141	0.732116	-0.329242	0.116179	-0.183667	0.39029	0.219201	0.303423	0.206661	0.332599	-0.153942	0.472636	0.407712	0.0479694	-0.0905769	0.673818	0.427572	0.0371491	0.0362464	0.866469	-0.186247	0.38355	-0.417649	0.042284	-0.829455	5.43103e-07	0.850562	1.40871e-07	-0.113435	0.597668	0.0713861	0.740287	0.595175	0.00215478	-0.396783	0.0548939	-0.281556	0.182579	-0.392979	0.0574774	-0.655518	0.000506729	0.502417	0.0123499
XLOC_010671	Bra022899	AT2G32730	M1	-0.367448	0.0773266	-0.382957	0.0647351	-0.385094	0.0631316	0.0677527	0.753095	-0.00209613	0.992244	0.194442	0.362585	0.382976	0.0647207	-0.210755	0.322893	0.58087	0.00291677	-0.418969	0.0415703	-0.099914	0.642281	-0.295108	0.161525	-0.757406	1.82445e-05	0.763138	1.44409e-05	0.303045	0.150019	0.0451512	0.834064	0.550237	0.00533877	-0.330452	0.114765	-0.333262	0.111527	-0.231798	0.275764	-0.698292	0.000147891	0.540721	0.00636948
XLOC_010695	Bra022933	AT2G33255	M1	0.42258	0.0396669	0.229866	0.279899	0.336451	0.107935	-0.232886	0.273454	0.47754	0.0182803	-0.440878	0.0310517	-0.195192	0.360701	0.337629	0.10663	-0.0950257	0.658721	0.406989	0.0484054	0.211066	0.322164	-0.316569	0.131774	-0.0407971	0.849879	-0.137092	0.522963	-0.278729	0.187199	-0.395999	0.0554192	0.229749	0.280151	0.206723	0.33245	-0.00210823	0.992199	-0.493717	0.0142107	-0.103233	0.63121	-0.298688	0.156261
XLOC_010759	Bra023029	AT2G35790	M1	0.326963	0.118879	0.233834	0.271451	0.277885	0.188594	-0.269763	0.202379	0.433485	0.034332	-0.464915	0.0220755	-0.220578	0.30032	0.324267	0.122132	0.251951	0.234956	0.0333166	0.877179	0.480418	0.0174939	-0.900715	1.99948e-09	-0.578418	0.003068	0.399347	0.0532041	0.13846	0.518784	-0.454199	0.0257753	0.941179	7.64466e-12	-0.502038	0.0124264	-0.349821	0.0937962	-0.570054	0.00363464	-0.847491	1.73565e-07	0.473679	0.0193798
XLOC_010772	Bra023052	AT2G36160	M1	0.356336	0.0874293	0.351554	0.0920702	0.360161	0.0838463	-0.338472	0.105703	0.500415	0.0127591	-0.419119	0.0414901	-0.377919	0.0686392	0.272709	0.197301	0.198161	0.353297	-0.0987701	0.646114	0.667363	0.000367373	-0.911471	5.96208e-10	-0.376802	0.0695285	0.288586	0.171434	0.34267	0.101176	-0.235917	0.267081	0.974068	1.0902e-15	-0.426911	0.0374747	-0.540072	0.0064454	-0.428019	0.0369298	-0.8356	3.73904e-07	0.554293	0.00494406
XLOC_010792	Bra023091	AT2G37020	M1	-0.0992225	0.644597	-0.121184	0.572707	-0.126783	0.554964	-0.10888	0.612551	0.115615	0.590599	-0.043398	0.840424	0.107558	0.616898	-0.0393395	0.855186	0.616171	0.00134594	-0.348075	0.0955599	0.237523	0.263742	-0.658428	0.000468836	-0.759623	1.66799e-05	0.597801	0.00203517	0.38263	0.0649838	-0.245801	0.246962	0.855536	9.94612e-08	-0.284591	0.177708	-0.371125	0.0741863	-0.535553	0.00699572	-0.933933	2.65195e-11	0.465887	0.0217624
XLOC_010807	Bra000003	AT2G37480	M1	0.412705	0.0450426	0.411521	0.0457235	0.418763	0.041681	-0.207233	0.331231	0.434145	0.0340287	-0.417077	0.042596	-0.366141	0.0784667	0.345414	0.0982945	0.172901	0.419128	0.0148203	0.945203	0.655836	0.000502465	-0.854402	1.07801e-07	-0.308234	0.142818	0.181094	0.397078	0.285643	0.17604	-0.36382	0.0805223	0.875283	2.1736e-08	-0.482467	0.0169514	-0.418118	0.0420293	-0.299608	0.154928	-0.737562	3.91312e-05	0.531828	0.00747817
XLOC_010820	Bra000024	AT2G37860	M1	0.406147	0.0489167	0.222182	0.296728	0.319861	0.127586	-0.0417141	0.846543	0.420988	0.0404973	-0.4621	0.023003	-0.14293	0.505243	0.425425	0.0382159	-0.1407	0.511975	0.360874	0.0831909	0.241017	0.256572	-0.493471	0.0142663	-0.214267	0.314707	0.329295	0.116117	-0.202534	0.342554	-0.00667742	0.975296	0.48111	0.0173093	-0.659658	0.000453569	-0.20295	0.341544	0.138948	0.517296	-0.287683	0.172839	0.638315	0.000789554
XLOC_010825	Bra000034	NA	M1	0.469955	0.0204906	0.487602	0.0156512	0.479396	0.0177701	-0.420203	0.0409117	0.501771	0.0124808	-0.512202	0.0105014	-0.501136	0.0126105	0.405415	0.0493649	0.115322	0.591546	-0.00725269	0.973169	0.748549	2.58672e-05	-0.944425	4.1572e-12	-0.283392	0.179621	0.097098	0.651733	0.275648	0.192324	-0.46789	0.0211283	0.935725	1.97646e-11	-0.344266	0.0994927	-0.426475	0.0376911	-0.540956	0.00634218	-0.767633	1.19676e-05	0.366163	0.078447
XLOC_010859	Bra000100	AT2G38840	M1	0.341972	0.101918	0.277478	0.189269	0.304528	0.147935	-0.225539	0.289302	0.195768	0.359257	-0.370693	0.07455	-0.332503	0.112396	0.35512	0.0885928	-0.039054	0.856227	0.11391	0.596125	0.420769	0.0406126	-0.636639	0.000823248	-0.213925	0.3155	0.0772793	0.719657	0.0795883	0.711625	-0.500166	0.0128108	0.519641	0.00925459	-0.765022	1.33544e-05	-0.0724896	0.736411	-0.0527856	0.806486	-0.450529	0.0271511	0.462568	0.0228465
XLOC_010864	Bra000109	NA	M1	0.336253	0.108155	0.287078	0.173784	0.330801	0.114358	-0.15697	0.463863	0.311344	0.138623	-0.349127	0.0944941	-0.35036	0.0932565	0.227356	0.285329	0.269572	0.202711	-0.0769442	0.720826	0.620547	0.00121511	-0.852147	1.26253e-07	-0.343505	0.100293	0.139743	0.514878	0.32672	0.11917	-0.443825	0.0298161	0.855264	1.01411e-07	-0.362169	0.0820092	-0.302561	0.150703	-0.470687	0.0202682	-0.781914	6.4036e-06	0.362225	0.0819589
XLOC_010867	Bra000112	NA	M1	0.487896	0.0155794	0.560249	0.00440908	0.534975	0.00706883	-0.345416	0.0982927	0.513453	0.0102826	-0.480049	0.0175933	-0.520026	0.00919367	0.315151	0.133608	-0.0350904	0.870692	0.00803704	0.970268	0.748057	2.6363e-05	-0.828657	5.69497e-07	-0.093127	0.665149	0.12025	0.575689	0.295155	0.161456	-0.0751444	0.72711	0.834118	4.09684e-07	-0.427934	0.0369714	-0.643859	0.000686402	-0.22525	0.289937	-0.619312	0.00125086	0.550678	0.00529459
XLOC_010872	Bra000127	AT2G39290	M1	0.183166	0.391608	0.102074	0.635068	0.157973	0.460975	0.0250244	0.907599	0.123585	0.565065	-0.174768	0.414047	-0.0606439	0.778333	-0.0107711	0.960161	0.00903847	0.966566	0.12412	0.56337	0.160671	0.453256	-0.347131	0.0965231	-0.168226	0.432005	0.198203	0.353194	0.0679828	0.752282	-0.0595049	0.782398	0.305262	0.146912	-0.702024	0.000131518	-0.192146	0.368393	0.2263	0.287633	-0.297203	0.15843	0.568244	0.00376825
XLOC_010875	Bra000135	AT2G39460	M1	0.37746	0.0690039	0.398515	0.0537474	0.398445	0.0537934	-0.314763	0.134113	0.508808	0.0111148	-0.404276	0.0500687	-0.412056	0.0454145	0.267585	0.206189	0.121914	0.570378	-0.109031	0.612055	0.698511	0.000146886	-0.879294	1.54691e-08	-0.288624	0.171376	0.292271	0.165786	0.377378	0.0690695	-0.10388	0.629061	0.936466	1.74572e-11	-0.522544	0.00880269	-0.660579	0.00044242	-0.263164	0.214069	-0.780444	6.84369e-06	0.659765	0.000452267
XLOC_010883	Bra000161	AT2G40020	M1	0.012763	0.952801	0.0447606	0.83548	0.0203155	0.924933	-0.0860772	0.689213	0.14979	0.484802	-0.0852733	0.691977	-0.0815838	0.704707	-0.0566904	0.792465	0.526662	0.00819289	-0.375819	0.0703192	0.438501	0.0320778	-0.744788	2.98741e-05	-0.570721	0.00358641	0.455697	0.0252297	0.521824	0.00891296	-0.154693	0.470451	0.899328	2.31356e-09	-0.379608	0.0673112	-0.493453	0.0142704	-0.403404	0.0506124	-0.936145	1.84245e-11	0.561636	0.00429172
XLOC_010921	Bra000227	AT2G41430	M1	-0.105658	0.62317	0.0378353	0.86067	-0.0578525	0.788305	-0.194644	0.362079	0.0538699	0.802587	0.108155	0.614935	-0.116396	0.588076	-0.110884	0.605984	0.606947	0.00166167	-0.563653	0.00412581	0.501815	0.0124719	-0.663619	0.000407296	-0.483118	0.0167818	0.303966	0.148722	0.757993	1.78184e-05	-0.244873	0.248807	0.835179	3.83757e-07	-0.352246	0.0913873	-0.420878	0.0405553	-0.235522	0.267905	-0.92538	9.71798e-11	0.567383	0.00383326
XLOC_010969	Bra000317	AT2G43650	M1	0.557719	0.00463001	0.557075	0.00468776	0.563234	0.00415983	-0.389921	0.0596218	0.518227	0.00948165	-0.616475	0.00133645	-0.605343	0.00172256	0.501999	0.0124343	-0.0403367	0.851554	0.0636153	0.767756	0.786327	5.22903e-06	-0.987122	5.2453e-19	-0.206594	0.332757	0.0752133	0.726869	0.201915	0.344064	-0.450267	0.0272513	0.913282	4.79119e-10	-0.51009	0.0108797	-0.413543	0.0445652	-0.486141	0.0160125	-0.701024	0.000135744	0.409371	0.0469808
XLOC_010982	Bra000339	AT2G44060	M1	0.362531	0.081682	0.270613	0.200905	0.350077	0.0935394	0.0500813	0.816231	0.279078	0.186624	-0.428222	0.0368307	-0.300187	0.154093	0.291508	0.166944	-0.400247	0.0526201	0.24126	0.256078	0.241923	0.254733	-0.321399	0.125662	0.117731	0.583771	0.186579	0.382687	-0.205237	0.336014	0.348612	0.0950148	0.251394	0.236027	-0.476702	0.0185143	-0.267643	0.206086	0.145877	0.496408	-0.0204606	0.924399	0.444209	0.0296578
XLOC_010993	Bra000351	AT2G44350	M1	-0.22717	0.285734	-0.311385	0.138568	-0.275177	0.193116	-0.171758	0.422257	0.0506494	0.814182	0.139523	0.515546	0.366966	0.0777452	-0.279941	0.185208	0.483202	0.01676	-0.14823	0.489414	-0.169185	0.429346	-0.0920831	0.668693	-0.512777	0.0104003	0.388787	0.0604328	0.104545	0.626854	-0.0117745	0.956453	0.301896	0.151648	0.264031	0.212507	-0.0954754	0.657202	-0.381365	0.0659503	-0.412125	0.0453752	0.0363028	0.866263
XLOC_010995	Bra000356,Bra000357	NA	M1	-0.110868	0.606037	-0.250847	0.237082	-0.181523	0.395943	0.0108967	0.959697	0.195942	0.358821	-0.0214047	0.92092	0.282168	0.18159	-0.146469	0.494645	0.599701	0.00195216	-0.18819	0.378518	0.0338101	0.875373	-0.455651	0.0252466	-0.723402	6.48273e-05	0.635733	0.000841986	0.19451	0.362414	0.00142812	0.994716	0.692177	0.000178581	-0.0322376	0.881129	-0.342105	0.101777	-0.500763	0.0126873	-0.76538	1.3156e-05	0.347008	0.0966498
XLOC_011018	Bra000398	AT2G45710	M1	0.634663	0.00086457	0.6089	0.00159	0.65956	0.000454772	-0.503178	0.0121972	0.685749	0.000216694	-0.54075	0.00636614	-0.653594	0.000533223	0.307051	0.144439	-0.345403	0.0983064	0.205329	0.335791	0.744375	3.03451e-05	-0.631893	0.000925478	0.263419	0.21361	-0.182411	0.393597	0.167631	0.43366	0.0327978	0.879078	0.535182	0.00704257	-0.259401	0.220934	-0.623976	0.00112034	-0.0833384	0.698643	-0.264176	0.212248	0.320006	0.127403
XLOC_011021	Bra000403	AT2G45790	M1	0.267625	0.206117	0.0657728	0.7601	0.188913	0.376656	-0.189621	0.374837	0.537666	0.00673374	-0.35422	0.0894613	-0.000231896	0.999142	0.212528	0.318745	0.262125	0.21595	0.154308	0.47157	0.258001	0.223527	-0.607535	0.00163982	-0.523975	0.00858658	0.410329	0.0464173	-0.004066	0.984956	-0.215398	0.3121	0.711959	9.54017e-05	-0.181149	0.396933	-0.339527	0.104552	-0.439168	0.0317872	-0.632493	0.000911975	0.347837	0.0958018
XLOC_011025	Bra000413	NA	M1	0.175797	0.411261	0.0189889	0.929823	0.0754307	0.726109	-0.0836717	0.697493	0.198197	0.353209	-0.340782	0.103193	0.053409	0.804244	0.350572	0.0930457	0.249642	0.239417	0.205314	0.335827	0.0652193	0.762062	-0.508698	0.0111351	-0.577129	0.00315009	0.285435	0.17637	-0.197203	0.355677	-0.604503	0.00175523	0.521628	0.0089433	-0.2313	0.276827	0.202394	0.342897	-0.5304	0.00767036	-0.499302	0.0129915	0.100452	0.640481
XLOC_011057	Bra000454	AT2G47470	M1	0.616886	0.00132376	0.53505	0.00705921	0.569371	0.00368454	-0.298001	0.157262	0.55987	0.00444162	-0.740496	3.51054e-05	-0.424175	0.0388479	0.763863	1.40139e-05	-0.361689	0.0824456	0.519463	0.00928303	0.37179	0.0736285	-0.534557	0.00712203	-0.0374313	0.862143	-0.0615332	0.775163	-0.452023	0.026584	-0.419255	0.0414172	0.406961	0.0484225	-0.0611933	0.776374	-0.0283678	0.895316	-0.512989	0.0103633	-0.105505	0.623675	-0.0896442	0.676999
XLOC_011058	Bra000455,Bra000456	NA	M1	0.619145	0.00125578	0.534192	0.00716885	0.634294	0.000872475	-0.539264	0.00654103	0.777457	7.8212e-06	-0.497523	0.0133702	-0.516815	0.00971299	0.19698	0.356231	-0.322473	0.124331	0.312783	0.136711	0.640991	0.000738206	-0.535378	0.00701779	0.236954	0.264921	-0.171287	0.423551	0.118819	0.580274	0.0499497	0.816706	0.461939	0.0230571	-0.277539	0.189167	-0.590414	0.00238689	0.0767815	0.721393	-0.222883	0.295168	0.384522	0.0635582
XLOC_011064	Bra000474	NA	M1	0.332351	0.11257	0.488013	0.0155507	0.39759	0.0543575	-0.702732	0.000128599	0.516845	0.00970803	-0.30042	0.153758	-0.532302	0.00741532	0.316685	0.131624	0.0375405	0.861745	-0.180986	0.397364	0.760688	1.59714e-05	-0.69788	0.000149803	-0.0489138	0.820446	-0.06935	0.747456	0.466253	0.0216452	-0.320352	0.126969	0.732978	4.62355e-05	-0.157039	0.463665	-0.53307	0.00731433	-0.297072	0.158622	-0.569718	0.0036591	0.310591	0.13963
XLOC_011081	Bra000508	AT2G27500	M1	-0.177963	0.405427	0.0820078	0.70324	-0.0902375	0.674975	-0.0819123	0.703571	-0.142024	0.507972	0.200179	0.348316	-0.23985	0.258953	0.0941251	0.661767	0.430246	0.0358533	-0.628821	0.000997313	0.47954	0.017731	-0.426627	0.0376156	-0.191083	0.371098	0.0193085	0.928644	0.711817	9.58506e-05	-0.328282	0.117311	0.53537	0.00701872	-0.172769	0.41949	-0.0985494	0.646854	-0.135812	0.526889	-0.585	0.0026764	0.288135	0.172135
XLOC_011082	Bra000509	NA	M1	0.076502	0.722368	0.167837	0.433087	0.126952	0.554432	-0.339493	0.104588	0.199657	0.349599	0.0874558	0.684484	-0.258029	0.223474	-0.102498	0.633655	0.278494	0.187587	-0.294725	0.162097	0.536002	0.00693924	-0.418134	0.0420205	-0.0235881	0.912882	-0.106601	0.620054	0.646828	0.000636104	-0.200451	0.347648	0.483817	0.0166013	-0.254184	0.230693	-0.311298	0.138684	0.135063	0.529191	-0.505504	0.0117399	0.425138	0.03836
XLOC_011096	Bra000532	AT2G26840	M1	0.246182	0.246206	0.0265652	0.901936	0.18921	0.375891	0.0179714	0.933575	0.464541	0.0221969	-0.31298	0.136451	0.0179065	0.933814	0.0487455	0.821054	0.0468094	0.828056	0.188031	0.37893	0.172879	0.419188	-0.488416	0.0154528	-0.360941	0.0831294	0.530105	0.00771054	-0.0207686	0.923264	0.241054	0.256497	0.570223	0.00362234	-0.594042	0.0022082	-0.459519	0.0238807	0.0536485	0.803383	-0.465907	0.0217561	0.728049	5.51157e-05
XLOC_011138	Bra000602	AT5G49945	M1	0.564895	0.00402641	0.522768	0.00876857	0.578169	0.00308368	-0.565109	0.00400948	0.664613	0.00039635	-0.466979	0.021415	-0.381321	0.0659838	0.266194	0.208646	-0.1985	0.352458	0.388675	0.060513	0.521903	0.00890088	-0.439796	0.0315157	0.158133	0.460517	-0.214753	0.313585	-0.00734343	0.972833	-0.102357	0.634124	0.431184	0.0354074	0.0690249	0.748603	-0.353813	0.0898552	-0.0844942	0.694658	-0.180539	0.398551	0.184714	0.387546
XLOC_011148	Bra000616,Bra000617	NA	M1	-0.179608	0.40103	-0.345024	0.0987008	-0.26877	0.204109	0.194095	0.363461	0.134409	0.531206	-0.0171642	0.936552	0.396563	0.0550408	-0.0674019	0.754334	0.55335	0.00503355	-0.147352	0.492019	-0.103364	0.630773	-0.429852	0.0360421	-0.839456	2.93496e-07	0.853511	1.14782e-07	0.09578	0.656174	0.06555	0.76089	0.670978	0.000332104	-0.439763	0.0315299	-0.261999	0.21618	-0.239188	0.26031	-0.743876	3.09243e-05	0.654628	0.000518839
XLOC_011150	Bra000622	NA	M1	-0.339227	0.104878	-0.337551	0.106716	-0.345031	0.0986932	0.214179	0.314911	-0.170728	0.425089	0.240325	0.257982	0.259201	0.221303	-0.249495	0.239703	0.678189	0.000270415	-0.479378	0.017775	-0.0136956	0.949356	-0.226135	0.287994	-0.546285	0.00574836	0.394066	0.0567302	0.338043	0.106174	-0.0590055	0.784182	0.447174	0.0284599	0.355652	0.0880823	-0.122452	0.568666	-0.633159	0.000897191	-0.601054	0.00189486	-0.0678488	0.752755
XLOC_011153	Bra000625	AT5G50375	M1	0.462804	0.022768	0.237513	0.263763	0.389647	0.0598172	-0.235693	0.267548	0.443611	0.0299043	-0.465875	0.0217661	-0.169841	0.427533	0.0287296	0.893988	-0.290987	0.167739	0.433099	0.0345105	0.170581	0.425492	-0.355606	0.0881266	-0.0155411	0.942542	0.156417	0.465458	-0.229935	0.279751	0.156213	0.466047	0.248712	0.241231	-0.459704	0.0238167	-0.417802	0.0422005	0.0240538	0.911169	-0.131254	0.540977	0.334374	0.110264
XLOC_011158	Bra000632	AT4G07390	M1	0.0406263	0.850501	-0.00484789	0.982064	0.0256938	0.905138	-0.151633	0.479381	-0.00132287	0.995105	-0.0558516	0.795472	0.130992	0.541792	-0.221805	0.29757	0.00610246	0.977423	0.197904	0.353935	-0.0872785	0.685091	-0.0138348	0.948842	-0.0768195	0.721261	0.13406	0.532282	-0.0843274	0.695233	0.159314	0.457132	0.0459443	0.831189	-0.115318	0.591561	-0.17884	0.403081	0.0853264	0.691794	-0.0428058	0.842575	0.199277	0.350536
XLOC_011168	Bra000659	AT4G08900	M1	-0.0150441	0.944377	-0.247878	0.242863	-0.117252	0.585313	-4.82236e-05	0.999822	0.180133	0.399631	-0.142861	0.505449	0.35354	0.0901213	0.0589773	0.784282	0.43132	0.0353429	0.156663	0.464749	-0.14242	0.506777	-0.327356	0.118411	-0.704578	0.000121249	0.524436	0.00851802	-0.179148	0.402256	-0.312969	0.136465	0.475169	0.0189491	-0.0537643	0.802967	0.0313386	0.884422	-0.477119	0.0183976	-0.515719	0.00989578	0.176736	0.408727
XLOC_011174	Bra000667	AT4G09020	M1	0.226747	0.286656	0.175117	0.413099	0.199145	0.350863	-0.248936	0.240793	0.368522	0.0763989	-0.35927	0.0846711	-0.160965	0.452419	0.251719	0.235401	0.30483	0.147514	-0.0689585	0.748837	0.457374	0.0246307	-0.856017	9.61067e-08	-0.5974	0.00205306	0.493303	0.0143046	0.22646	0.287283	-0.321863	0.125086	0.950502	1.19663e-12	-0.56311	0.00416998	-0.409588	0.0468529	-0.425808	0.0380238	-0.872152	2.81223e-08	0.626632	0.00105137
XLOC_011190	Bra000692	AT4G09800	M1	-0.0589144	0.784507	-0.0965886	0.653448	-0.0651695	0.762239	-0.0628482	0.770482	0.242385	0.253799	-0.0508818	0.813344	0.0865473	0.687599	-0.161485	0.450939	0.494358	0.0140661	-0.328787	0.116715	0.24573	0.247103	-0.571396	0.00353817	-0.595418	0.00214346	0.620114	0.00122755	0.375932	0.0702276	0.14518	0.498491	0.792324	3.94044e-06	-0.167613	0.433709	-0.619972	0.00123166	-0.435876	0.0332423	-0.822548	8.12277e-07	0.496187	0.0136604
XLOC_011215	Bra000734	AT4G11120	M1	0.252687	0.233546	0.376033	0.0701463	0.336491	0.107891	-0.228962	0.281848	0.304573	0.147872	-0.0882265	0.681845	-0.350583	0.0930338	-0.000299795	0.998891	-0.0938326	0.662758	-0.0672227	0.754968	0.540106	0.0064414	-0.34131	0.102627	0.223897	0.292919	-0.0798387	0.710756	0.441345	0.0308534	0.241101	0.256402	0.369549	0.0755196	-0.466642	0.0215215	-0.47446	0.0191532	0.511718	0.0105871	-0.2364	0.266074	0.687043	0.000208495
XLOC_011243	Bra000781	NA	M1	0.6082	0.00161539	0.624934	0.00109504	0.628656	0.0010013	-0.426401	0.037728	0.58779	0.00252368	-0.617014	0.00131984	-0.667549	0.000365484	0.508357	0.0111985	-0.103534	0.63021	0.077523	0.718808	0.85564	9.87259e-08	-0.967695	1.18675e-14	-0.0910542	0.672193	0.00370037	0.986309	0.242177	0.25422	-0.37218	0.0733029	0.891776	4.94436e-09	-0.499221	0.0130085	-0.481162	0.0172953	-0.366517	0.0781372	-0.648313	0.000612168	0.451531	0.0267698
XLOC_011264	Bra000821	AT4G03520	M1	-0.148189	0.489534	-0.156756	0.464481	-0.173538	0.417392	-0.0876314	0.683882	0.158556	0.459302	0.105916	0.622316	0.191383	0.370332	-0.122157	0.569606	0.680683	0.00025154	-0.332102	0.112856	0.210941	0.322456	-0.494783	0.0139708	-0.643529	0.000692208	0.501043	0.0126295	0.473839	0.0193331	-0.111576	0.603725	0.753719	2.11353e-05	-0.17049	0.425743	-0.324603	0.121723	-0.231577	0.276235	-0.840574	2.7328e-07	0.538354	0.0066502
XLOC_011285	Bra000849	AT4G03020	M1	0.322267	0.124586	0.172046	0.421469	0.260915	0.218155	-0.0614225	0.775558	0.272062	0.198409	-0.452065	0.0265683	-0.128737	0.54883	0.318577	0.129207	0.216387	0.309827	0.17233	0.420691	0.320903	0.12628	-0.757489	1.8184e-05	-0.537249	0.00678471	0.331659	0.113366	-0.0544491	0.800506	-0.459563	0.0238655	0.762814	1.46355e-05	-0.437815	0.0323789	-0.0587744	0.785007	-0.484176	0.0165092	-0.682594	0.000237863	0.379621	0.0673013
XLOC_011288	Bra000853	AT4G02930	M1	0.0957915	0.656136	-0.0159951	0.940866	0.0317737	0.882828	-0.147642	0.491155	0.26418	0.21224	-0.289803	0.169554	0.0360985	0.867009	0.168029	0.432553	0.418015	0.0420853	-0.0608545	0.777582	0.244277	0.249998	-0.76669	1.24527e-05	-0.761452	1.54791e-05	0.616232	0.00134403	0.133355	0.53446	-0.333166	0.111637	0.893555	4.15553e-09	-0.527368	0.00809201	-0.245144	0.248267	-0.48701	0.0157968	-0.877887	1.74532e-08	0.579727	0.00298645
XLOC_011301	Bra000879	AT4G02450	M1	0.265831	0.209291	0.314547	0.134394	0.294188	0.162899	-0.114113	0.595465	0.322422	0.124395	-0.352319	0.0913161	-0.360187	0.0838222	0.276628	0.190684	0.18964	0.374788	-0.19205	0.368635	0.610294	0.00154049	-0.828783	5.65246e-07	-0.336698	0.107661	0.315906	0.132629	0.332279	0.112652	-0.149521	0.485595	0.886434	8.18681e-09	-0.406816	0.0485101	-0.484692	0.0163777	-0.422009	0.0399632	-0.757788	1.79658e-05	0.499567	0.012936
XLOC_011329	Bra000919	AT4G01650	M1	0.273962	0.195169	0.151935	0.478496	0.219428	0.30291	-0.330775	0.114389	0.483897	0.0165806	-0.266112	0.208792	-0.0828579	0.700302	0.185152	0.386404	0.0105417	0.961009	0.244016	0.25052	0.18947	0.375226	-0.243249	0.252059	-0.0823869	0.70193	0.0170817	0.936857	-0.0890032	0.679188	-0.12223	0.569372	0.280952	0.18356	0.208982	0.327075	-0.231094	0.277268	-0.293618	0.163754	-0.172845	0.419282	-0.0528981	0.806082
XLOC_011338	Bra000931	AT4G00830	M1	-0.242073	0.25443	-0.212372	0.319109	-0.273475	0.195996	-0.146291	0.495174	0.104422	0.627261	0.159962	0.455279	0.170351	0.426126	-0.182205	0.394139	0.442871	0.0302117	-0.415138	0.043668	0.0436072	0.839665	-0.258721	0.222191	-0.484167	0.0165114	0.496772	0.0135328	0.388967	0.0603033	0.0888828	0.6796	0.438806	0.0319447	-0.154259	0.471715	-0.451726	0.0266958	-0.232669	0.273915	-0.560754	0.00436602	0.309781	0.14072
XLOC_011359	Bra000967	AT4G00570	M1	0.418573	0.0417833	0.483086	0.0167901	0.4536	0.0259959	-0.370416	0.0747834	0.409724	0.0467726	-0.409828	0.0467115	-0.529249	0.00782817	0.481354	0.0172444	-0.00200594	0.992578	0.00197803	0.992681	0.708386	0.000107238	-0.774463	8.92358e-06	-0.112387	0.601079	-0.0616244	0.774838	0.285736	0.175894	-0.495014	0.0139193	0.731478	4.87945e-05	-0.428259	0.0368124	-0.209497	0.325856	-0.244362	0.249828	-0.554679	0.00490779	0.385929	0.0625135
XLOC_011372	Bra000989	AT3G01790	M1	-0.0316981	0.883104	-0.170043	0.426975	-0.0984958	0.647035	-0.0844899	0.694673	0.269923	0.202101	-0.151616	0.479431	0.240468	0.257691	-0.0382212	0.859262	0.503021	0.0122285	-0.0930362	0.665457	0.0734302	0.733111	-0.581306	0.00289058	-0.79323	3.77252e-06	0.738609	3.76501e-05	0.124108	0.563407	-0.0656517	0.760529	0.795081	3.44915e-06	-0.32936	0.116041	-0.384101	0.0638728	-0.44042	0.0312474	-0.822498	8.14588e-07	0.559855	0.00444286
XLOC_011396	Bra001020	AT3G01120	M1	0.503863	0.012061	0.469193	0.0207242	0.480336	0.017516	-0.499302	0.0129915	0.600014	0.00193881	-0.53015	0.00770436	-0.404533	0.0499091	0.431849	0.0350937	0.0665037	0.757512	0.14258	0.506294	0.671679	0.000325614	-0.895257	3.50888e-09	-0.314804	0.13406	0.18636	0.383256	0.196399	0.357681	-0.394827	0.0562107	0.909793	7.2717e-10	-0.542332	0.00618411	-0.442837	0.030226	-0.268068	0.205338	-0.721011	7.0386e-05	0.595223	0.00215252
XLOC_011402	Bra001035,Bra001036	NA	M1	-0.390574	0.0591592	-0.415901	0.0432437	-0.404958	0.0496462	0.12604	0.557303	0.0827015	0.700842	0.324068	0.122374	0.373884	0.071894	-0.444799	0.0294162	0.693802	0.00016993	-0.557609	0.00463983	-0.0524443	0.807715	-0.212279	0.319327	-0.632716	0.000907004	0.649084	0.000600051	0.495098	0.0139007	0.262003	0.216172	0.492271	0.0145409	0.0268327	0.900953	-0.556684	0.00472306	-0.316648	0.131671	-0.698714	0.000145956	0.315513	0.133138
XLOC_011411	Bra001052	AT3G02560	M1	0.489193	0.0152653	0.556789	0.00471359	0.534202	0.00716758	-0.458888	0.0240994	0.581619	0.00287187	-0.443443	0.0299738	-0.568808	0.00372614	0.312167	0.137527	0.00815184	0.969844	-0.0656652	0.760482	0.837574	3.30564e-07	-0.863975	5.34547e-08	-0.0757896	0.724855	0.0656042	0.760698	0.417832	0.0421844	-0.123546	0.56519	0.881962	1.22542e-08	-0.39131	0.0586408	-0.687536	0.000205443	-0.217613	0.307027	-0.676059	0.000287502	0.554407	0.00493336
XLOC_011426	Bra001085	AT3G03710	M1	-0.0697675	0.745985	-0.191333	0.37046	-0.130931	0.54198	0.257819	0.223863	0.0849434	0.693112	-0.165146	0.440602	0.18196	0.394788	0.0152308	0.943688	0.437238	0.0326341	-0.184978	0.386858	0.0333264	0.877143	-0.568339	0.00376115	-0.752504	2.21729e-05	0.748133	2.62863e-05	0.0682269	0.751419	-0.0249597	0.907837	0.714404	8.79762e-05	-0.378079	0.0685129	-0.29693	0.158831	-0.556174	0.00476949	-0.75285	2.18728e-05	0.430475	0.0357442
XLOC_011433	Bra001094	AT3G03960	M1	0.524782	0.00846674	0.476371	0.0186076	0.510176	0.0108642	-0.347466	0.0961804	0.537514	0.0067523	-0.632522	0.00091133	-0.506463	0.0115555	0.516191	0.00981661	-0.00804873	0.970225	0.087263	0.685144	0.686242	0.000213539	-0.956151	3.24031e-13	-0.304493	0.147985	0.204464	0.337876	0.0888518	0.679706	-0.410675	0.0462148	0.917388	2.86531e-10	-0.401911	0.0515546	-0.424411	0.0387279	-0.620866	0.001206	-0.704122	0.000123029	0.340778	0.103198
XLOC_011438	Bra001104	AT3G04380	M1	-0.0641541	0.765842	-0.173914	0.416368	-0.108121	0.615047	0.00661446	0.975529	0.288758	0.171168	-0.104633	0.626564	0.182721	0.39278	-0.0839772	0.69644	0.461456	0.0232194	-0.227311	0.285427	0.123814	0.564341	-0.572866	0.003435	-0.721774	6.85673e-05	0.778256	7.54823e-06	0.231152	0.277144	0.144602	0.500222	0.793433	3.73576e-06	-0.381081	0.066169	-0.537983	0.00669514	-0.361111	0.0829732	-0.819309	9.75291e-07	0.634885	0.00085984
XLOC_011444	Bra001116	AT3G04650	M1	-0.100812	0.639277	-0.182367	0.393712	-0.156048	0.466524	0.0491698	0.819522	0.103988	0.628704	-0.114339	0.59473	0.17803	0.405247	0.0183172	0.9323	0.480021	0.0176007	-0.238774	0.261161	0.0967801	0.652803	-0.635697	0.000842727	-0.816867	1.11687e-06	0.792495	3.90817e-06	0.206393	0.33324	-0.113188	0.598471	0.80321	2.30158e-06	-0.640217	0.000752747	-0.343726	0.100059	-0.350698	0.0929198	-0.862401	6.02013e-08	0.687888	0.000203292
XLOC_011448	Bra001126	AT3G04830	M1	0.209319	0.326277	0.235721	0.267489	0.20907	0.326866	-0.331711	0.113305	0.37619	0.07002	-0.191175	0.370862	-0.09405	0.662022	0.192518	0.367448	0.30438	0.148143	0.0213751	0.921029	0.416644	0.0428337	-0.590926	0.00236096	-0.382459	0.0651134	0.199278	0.350535	0.290468	0.168532	-0.345686	0.0980121	0.70215	0.000130995	-0.393786	0.0569219	-0.240959	0.25669	-0.0379754	0.860159	-0.640478	0.000747818	0.583639	0.00275369
XLOC_011449	Bra001127	AT3G04840	M1	0.322762	0.123976	0.286632	0.174484	0.30866	0.142238	-0.274586	0.194113	0.450738	0.0270711	-0.439361	0.0317037	-0.317191	0.130974	0.310059	0.140346	0.163725	0.4446	-0.0790513	0.71349	0.575329	0.00326785	-0.909284	7.7179e-10	-0.466227	0.0216537	0.435907	0.0332285	0.256543	0.226245	-0.214279	0.31468	0.962983	5.19099e-14	-0.618421	0.00127723	-0.527861	0.00802219	-0.388899	0.0603526	-0.832461	4.53297e-07	0.655511	0.000506827
XLOC_011457	Bra001140,Bra001147	NA	M1	0.338474	0.105701	0.443063	0.0301318	0.390375	0.0593001	-0.284963	0.177117	0.382949	0.0647414	-0.346809	0.0968541	-0.466572	0.0215439	0.350609	0.0930089	0.153459	0.474042	-0.174087	0.415896	0.729725	5.19415e-05	-0.813302	1.35647e-06	-0.204793	0.337083	0.086366	0.688222	0.407874	0.0478723	-0.341545	0.102374	0.843166	2.31126e-07	-0.278329	0.187858	-0.485341	0.0162132	-0.420337	0.0408409	-0.697077	0.000153594	0.367902	0.0769331
XLOC_011467	Bra001154	NA	M1	0.357564	0.0862671	0.338707	0.105446	0.353921	0.0897504	-0.342274	0.101596	0.49734	0.0134095	-0.431586	0.0352175	-0.36165	0.0824811	0.253144	0.232672	0.148621	0.488256	-0.081321	0.705617	0.627546	0.00102851	-0.890981	5.33834e-09	-0.376078	0.0701099	0.345552	0.0981512	0.307849	0.143343	-0.14349	0.503558	0.947443	2.28147e-12	-0.495806	0.0137441	-0.597992	0.00202669	-0.379266	0.0675786	-0.806621	1.93157e-06	0.603401	0.00179887
XLOC_011468	Bra001156	NA	M1	0.271718	0.199	0.303483	0.149402	0.290741	0.168115	-0.354076	0.0895999	0.465072	0.0220245	-0.333515	0.111239	-0.316247	0.132188	0.208747	0.327632	0.22225	0.296578	-0.17788	0.40565	0.622619	0.00115706	-0.844905	2.06203e-07	-0.390205	0.0594203	0.363669	0.0806577	0.395285	0.0559006	-0.124525	0.562087	0.948959	1.66533e-12	-0.437888	0.0323471	-0.62139	0.0011912	-0.343119	0.1007	-0.828606	5.71188e-07	0.625493	0.0010805
XLOC_011476	Bra001174	NA	M1	0.50707	0.0114401	0.500181	0.0128078	0.505273	0.0117847	-0.48025	0.0175392	0.605729	0.00170774	-0.566833	0.00387526	-0.485468	0.0161814	0.395978	0.0554328	0.0147893	0.945318	0.0575736	0.789303	0.709176	0.000104517	-0.93559	2.02101e-11	-0.285869	0.175684	0.183801	0.389939	0.215388	0.312123	-0.344843	0.0988892	0.919452	2.19059e-10	-0.469572	0.0206076	-0.572522	0.00345891	-0.468086	0.0210671	-0.733573	4.52529e-05	0.462601	0.0228355
XLOC_011496	Bra001221	AT3G06860	M1	-0.00144936	0.994637	-0.11913	0.579276	-0.0736091	0.732484	0.205526	0.335318	0.0260629	0.903782	-0.252654	0.233608	0.0934069	0.6642	0.378784	0.0679566	0.271232	0.199835	-0.0165891	0.938674	-0.00353875	0.986907	-0.47451	0.0191386	-0.647798	0.000620385	0.510315	0.010839	-0.180208	0.399431	-0.453158	0.0261594	0.520678	0.00909108	-0.280843	0.183737	0.104801	0.626008	-0.634275	0.000872881	-0.512174	0.0105064	0.116639	0.587292
XLOC_011517	Bra001263	NA	M1	0.216698	0.309116	0.248875	0.240912	0.241797	0.254989	-0.55319	0.00504884	0.534386	0.007144	-0.142993	0.505052	-0.212715	0.31831	-0.0509087	0.813247	0.15602	0.466606	-0.146749	0.493811	0.520976	0.00904449	-0.535322	0.00702477	-0.168635	0.43087	0.200369	0.347849	0.464712	0.0221412	0.0964841	0.6538	0.662046	0.00042516	-0.306878	0.144676	-0.738164	3.82729e-05	0.0512058	0.812176	-0.595213	0.00215299	0.625319	0.001085
XLOC_011527	Bra001281	AT3G08010	M1	0.227926	0.284092	0.265948	0.209083	0.235797	0.26733	-0.358515	0.0853746	0.402308	0.0513029	-0.150065	0.483992	-0.266154	0.208717	0.135558	0.527668	0.139519	0.515559	-0.119232	0.578949	0.538938	0.00657999	-0.592636	0.00227606	-0.180117	0.399674	0.157467	0.462431	0.466652	0.0215186	-0.139918	0.514347	0.645779	0.000653502	-0.6879	0.000203221	-0.438867	0.0319181	0.252306	0.234274	-0.584539	0.00270237	0.778014	7.63019e-06
XLOC_011536	Bra001298	NA	M1	-0.0596588	0.781848	-0.0681928	0.75154	-0.0489809	0.820204	-0.193691	0.36448	0.169676	0.42799	0.0463185	0.829834	0.248014	0.242596	-0.141442	0.509732	0.22051	0.300473	0.132758	0.536307	-0.101219	0.63792	0.0157206	0.94188	-0.214757	0.313575	0.106893	0.619092	-0.0120305	0.955507	-0.0115499	0.957283	0.13688	0.523612	0.195983	0.358719	0.0554254	0.797001	-0.00598688	0.97785	-0.13656	0.524594	0.130198	0.544263
XLOC_011539	Bra001300	AT3G09680	M1	0.223144	0.294589	0.217772	0.306667	0.225415	0.289573	-0.194206	0.363181	0.395856	0.0555151	-0.266729	0.207699	-0.249998	0.238725	0.131327	0.540749	0.173657	0.417067	-0.168311	0.431769	0.529299	0.00782127	-0.765981	1.2829e-05	-0.366639	0.0780309	0.431561	0.0352295	0.398572	0.0537103	0.0212899	0.921343	0.84813	1.66253e-07	-0.751463	2.30972e-05	-0.584223	0.00272029	-0.0102033	0.962259	-0.761272	1.55937e-05	0.859662	7.37864e-08
XLOC_011551	Bra001324,Bra001325,tRNA-Glu	NA	M1	0.267835	0.205748	0.235552	0.267844	0.254071	0.230908	-0.218241	0.3056	0.413257	0.0447277	-0.353466	0.0901927	-0.257597	0.224277	0.226325	0.287579	0.204705	0.337295	-0.110808	0.606233	0.543049	0.00610306	-0.857953	8.35946e-08	-0.461407	0.0232361	0.455483	0.0253073	0.324795	0.12149	-0.138095	0.519897	0.930772	4.36882e-11	-0.727983	5.52442e-05	-0.51309	0.0103457	-0.187218	0.381031	-0.830325	5.15627e-07	0.794832	3.49119e-06
XLOC_011560	Bra001340	AT3G08880	M1	0.266265	0.208521	0.205783	0.334701	0.239784	0.259089	-0.0887849	0.679935	0.24143	0.255734	-0.410613	0.0462515	-0.203232	0.34086	0.2631	0.214185	0.131392	0.540545	0.05534	0.797308	0.295272	0.161282	-0.575148	0.00327988	-0.320404	0.126904	0.181894	0.394961	-0.0740126	0.73107	-0.263012	0.214344	0.585009	0.00267591	0.134565	0.530724	-0.152943	0.47555	-0.79645	3.226e-06	-0.474955	0.0190105	-0.106761	0.619526
XLOC_011592	Bra001401	AT3G11400	M1	0.512939	0.010372	0.464743	0.0221311	0.49081	0.0148814	-0.340575	0.103416	0.488524	0.0154268	-0.542478	0.00616751	-0.478371	0.0180503	0.44124	0.030898	0.0447389	0.835558	0.0752021	0.726908	0.706196	0.00011511	-0.918435	2.50274e-10	-0.261581	0.216939	0.165757	0.438891	0.191908	0.368997	-0.366884	0.0778165	0.888503	6.75511e-09	-0.495996	0.0137023	-0.463539	0.0225251	-0.38852	0.0606248	-0.710867	9.88916e-05	0.470384	0.02036
XLOC_011604	Bra001423	AT3G11830	M1	0.565863	0.00395027	0.532905	0.0073359	0.571329	0.00354297	-0.24761	0.243389	0.505346	0.0117704	-0.64854	0.000608579	-0.580276	0.00295282	0.580118	0.00296247	-0.14636	0.494968	0.143052	0.504876	0.712079	9.50245e-05	-0.897897	2.68363e-09	-0.143581	0.503285	0.117604	0.584181	0.0572778	0.790362	-0.315299	0.133415	0.827257	6.18495e-07	-0.495012	0.01392	-0.336969	0.10736	-0.404739	0.0497815	-0.558434	0.00456667	0.429466	0.0362275
XLOC_011609	Bra001435	AT3G12010	M1	0.151705	0.479171	0.0741855	0.730465	0.111901	0.602662	0.201954	0.343969	0.0296004	0.890794	-0.341252	0.102689	-0.218804	0.304323	0.410201	0.0464926	-0.124032	0.563649	-0.0246079	0.909131	0.10544	0.623889	-0.358777	0.0851299	-0.209306	0.326309	0.212794	0.318126	-0.232589	0.274084	-0.260805	0.218356	0.23439	0.270279	-0.179938	0.400151	-0.0277419	0.897614	-0.627336	0.00103372	-0.179216	0.402074	-0.198714	0.351927
XLOC_011615	Bra001450	AT3G12390	M1	0.488899	0.0153362	0.453257	0.0261228	0.482315	0.0169911	-0.375318	0.0707243	0.561167	0.00433111	-0.575768	0.00323878	-0.477442	0.0183076	0.425663	0.0380963	0.018865	0.93028	0.0500818	0.816229	0.698313	0.000147794	-0.967327	1.34188e-14	-0.322935	0.123762	0.258409	0.222768	0.194098	0.363452	-0.316522	0.131834	0.953291	6.4065e-13	-0.582027	0.00284769	-0.504077	0.0120187	-0.423211	0.0393411	-0.758207	1.76645e-05	0.559558	0.00446849
XLOC_011643	Bra001499	AT3G13320	M1	0.213074	0.317474	0.200131	0.348434	0.207738	0.330028	-0.33919	0.104918	0.235573	0.267799	-0.113257	0.598245	-0.186938	0.381757	-0.065915	0.759597	0.135176	0.528843	0.00999795	0.963019	0.330945	0.114192	-0.318419	0.129408	-0.0184761	0.931714	-0.122258	0.569282	0.252316	0.234255	-0.10387	0.629096	0.335896	0.108554	0.0825858	0.701242	-0.267423	0.206473	-0.152149	0.477871	-0.3147	0.134195	0.0789086	0.713986
XLOC_011657	Bra001522	AT3G13800	M1	-0.200768	0.346869	-0.124317	0.562747	-0.198241	0.353099	-0.0835722	0.697837	0.0353374	0.869789	0.121369	0.572116	0.115318	0.591561	-0.0444522	0.836598	0.229265	0.281194	-0.30894	0.141858	-0.04373	0.839219	-0.0657668	0.760122	-0.290605	0.168323	0.239392	0.259892	0.182045	0.394562	-0.0922485	0.668131	0.14157	0.509342	-0.0133364	0.950683	-0.212204	0.3195	-0.230611	0.2783	-0.252209	0.234461	-0.00279254	0.989667
XLOC_011662	Bra001526,Bra001528	NA	M1	0.160536	0.45364	0.117037	0.586006	0.110032	0.608772	-0.313366	0.135942	0.33667	0.107691	-0.279547	0.185855	-0.153209	0.474771	0.301051	0.152853	0.296667	0.159219	-0.1256	0.55869	0.381307	0.0659951	-0.668373	0.000357207	-0.48768	0.0156321	0.331045	0.114076	0.173286	0.418079	-0.390781	0.0590127	0.751632	2.29441e-05	-0.159103	0.457734	-0.307732	0.143505	-0.591967	0.00230894	-0.696019	0.000158714	0.21375	0.315906
XLOC_011676	Bra001559	AT3G14600	M1	0.208592	0.328	0.312753	0.136752	0.272087	0.198366	-0.28471	0.177519	0.322255	0.124601	-0.191466	0.370122	-0.396683	0.0549607	0.0422994	0.844415	0.260156	0.219545	-0.356519	0.087256	0.688666	0.000198598	-0.781608	6.49305e-06	-0.24514	0.248276	0.174753	0.414087	0.59721	0.00206158	-0.135864	0.526727	0.840619	2.72498e-07	-0.342937	0.100892	-0.651766	0.000559492	-0.340455	0.103545	-0.796847	3.1638e-06	0.468018	0.0210883
XLOC_011680	Bra001566,Bra001567	NA	M1	0.170979	0.424397	0.268747	0.204149	0.219272	0.303262	-0.38876	0.0604523	0.378014	0.068564	-0.137457	0.521847	-0.339793	0.104263	0.0075872	0.971932	0.337855	0.106381	-0.380367	0.0667208	0.684402	0.000225518	-0.764121	1.38648e-05	-0.283179	0.179964	0.198036	0.353607	0.649899	0.000587461	-0.147272	0.492254	0.869805	3.39644e-08	-0.291467	0.167007	-0.680514	0.000252781	-0.314915	0.133915	-0.838097	3.1988e-07	0.494484	0.0140379
XLOC_011689	Bra001577	AT3G14990	M1	0.137659	0.521228	0.262538	0.215202	0.190377	0.3729	-0.158253	0.460171	0.0233313	0.913828	-0.0904394	0.674287	-0.202552	0.342512	0.026308	0.902881	0.311145	0.138888	-0.13087	0.542169	0.465223	0.0219757	-0.546822	0.00569124	-0.199278	0.350534	-0.00632982	0.976582	0.419182	0.0414558	-0.27943	0.186047	0.607465	0.00164242	-0.299386	0.155249	-0.0658179	0.75994	-0.0192435	0.928884	-0.577037	0.00315601	0.470548	0.0203103
XLOC_011690	Bra001578	NA	M1	0.354289	0.089394	0.362712	0.0815185	0.357075	0.0867285	-0.283639	0.179226	0.370616	0.0746152	-0.427655	0.0371083	-0.380394	0.0667	0.332529	0.112365	0.189955	0.373981	-0.0730701	0.734374	0.65358	0.000533423	-0.938697	1.19055e-11	-0.406746	0.0485528	0.292665	0.165189	0.314169	0.134888	-0.363023	0.0812381	0.966113	1.99329e-14	-0.612133	0.00147718	-0.412357	0.045242	-0.358821	0.0850891	-0.837997	3.21902e-07	0.624838	0.00109755
XLOC_011691	Bra001579	AT3G15030	M1	0.645281	0.000661895	0.634619	0.000865504	0.651149	0.000568605	-0.40022	0.0526377	0.557021	0.00469261	-0.659905	0.000450552	-0.669522	0.000345934	0.546464	0.00572926	-0.122012	0.570066	0.140516	0.512532	0.830194	5.1967e-07	-0.97733	2.52248e-16	-0.107089	0.618443	-0.0240314	0.911252	0.167383	0.434351	-0.480082	0.0175843	0.863182	5.67657e-08	-0.507191	0.0114171	-0.414214	0.044186	-0.44125	0.0308935	-0.628461	0.00100605	0.366742	0.0779409
XLOC_011728	Bra001629	AT3G16360	M1	0.176176	0.410235	0.222446	0.29614	0.185794	0.384731	-0.386802	0.0618724	0.358087	0.0857757	-0.191503	0.370028	-0.211374	0.321443	0.246806	0.244972	0.344221	0.0995393	-0.153287	0.474545	0.532672	0.00736643	-0.699848	0.000140862	-0.396374	0.0551672	0.184098	0.38916	0.400799	0.0522645	-0.427504	0.0371822	0.812789	1.39448e-06	-0.301995	0.151507	-0.256506	0.226315	-0.254456	0.230178	-0.744003	3.07759e-05	0.488681	0.0153888
XLOC_011745	Bra001658	AT3G17300	M1	0.163436	0.445416	0.126549	0.555699	0.121509	0.571668	-0.0968116	0.652697	0.248468	0.241707	-0.235216	0.268545	-0.0631723	0.76933	0.174397	0.415055	0.35383	0.0898393	-0.0536375	0.803422	0.36376	0.0805766	-0.683247	0.000233336	-0.502321	0.0123693	0.419879	0.0410838	0.238292	0.262153	-0.183214	0.391481	0.806287	1.96522e-06	-0.480797	0.0173927	-0.283177	0.179965	-0.184614	0.38781	-0.748263	2.61543e-05	0.636963	0.000816645
XLOC_011756	Bra001674,Bra001676	NA	M1	0.119978	0.57656	0.159768	0.455832	0.123695	0.564717	-0.227477	0.285066	0.24816	0.242309	-0.184337	0.388534	-0.217643	0.306959	0.137257	0.522457	0.456277	0.0250213	-0.321338	0.125738	0.562344	0.00423286	-0.839552	2.91716e-07	-0.530026	0.00772137	0.350145	0.0934721	0.507624	0.0113356	-0.357558	0.0862723	0.951097	1.05053e-12	-0.414657	0.0439371	-0.425519	0.0381687	-0.443336	0.0300183	-0.940278	8.99824e-12	0.526217	0.00825711
XLOC_011768	Bra001692,Bra001693	NA	M1	0.357488	0.086339	0.317475	0.130611	0.372343	0.073167	-0.362219	0.0819646	0.46807	0.0210722	-0.180308	0.399164	-0.226669	0.286826	-0.0192001	0.929044	-0.153879	0.472819	0.21818	0.305738	0.404295	0.0500569	-0.244209	0.250134	0.22019	0.301193	-0.058902	0.784552	0.198877	0.351526	0.31045	0.139819	0.283361	0.179672	-0.336711	0.107646	-0.440271	0.0313114	0.561133	0.00433399	-0.122477	0.568585	0.642597	0.000708806
XLOC_011780	Bra001719	NA	M1	0.343459	0.100341	0.35558	0.088151	0.36828	0.0766073	-0.338716	0.105435	0.533368	0.00727539	-0.334652	0.10995	-0.361447	0.0826668	0.147862	0.490503	0.160409	0.454003	-0.113812	0.596443	0.67601	0.000287906	-0.809742	1.64032e-06	-0.251415	0.235986	0.265579	0.20974	0.429037	0.0364343	-0.0145495	0.946203	0.895504	3.42308e-09	-0.446193	0.028852	-0.67446	0.000300941	-0.179392	0.401606	-0.757375	1.82674e-05	0.673691	0.000307591
XLOC_011784	Bra001726	AT3G18860	M1	-0.0577024	0.788842	-0.00924017	0.96582	-0.0649343	0.763073	-0.0229208	0.915338	0.00768147	0.971583	-0.0885927	0.680592	0.0315927	0.883491	0.12225	0.569308	0.0537368	0.803066	-0.0926032	0.666927	0.0223773	0.917339	-0.246006	0.246554	-0.308854	0.141975	0.343421	0.100381	0.0371162	0.863293	-0.0746336	0.728897	0.280069	0.185	-0.493043	0.0143638	-0.104649	0.626511	-0.0365657	0.865303	-0.27438	0.194461	0.374053	0.0717556
XLOC_011814	Bra001774	NA	M1	0.515454	0.00994036	0.477305	0.0183456	0.518402	0.00945327	-0.346962	0.0966967	0.449733	0.0274569	-0.478566	0.0179968	-0.495156	0.0138879	0.244939	0.248676	0.0613736	0.775732	0.0719747	0.738219	0.728682	5.38968e-05	-0.870929	3.10417e-08	-0.153091	0.475117	0.0102053	0.962252	0.281039	0.183418	-0.360551	0.0834868	0.81823	1.03577e-06	-0.418334	0.0419125	-0.43494	0.0336659	-0.345159	0.0985595	-0.675507	0.000292084	0.404804	0.0497413
XLOC_011841	Bra001822	AT3G21270	M1	0.167296	0.434591	0.207694	0.330132	0.190411	0.372812	-0.271108	0.20005	0.283084	0.180115	-0.130783	0.542441	-0.160299	0.454315	0.0369584	0.863869	0.245387	0.247784	-0.109354	0.610994	0.473163	0.0195306	-0.627329	0.00103391	-0.314817	0.134042	0.261288	0.217474	0.451001	0.0269708	-0.142965	0.505137	0.715801	8.39676e-05	-0.701082	0.000135496	-0.399008	0.0534251	0.175992	0.410733	-0.6803	0.000254366	0.835345	3.79852e-07
XLOC_011896	Bra001911	AT3G23390	M1	0.353306	0.0903492	0.368375	0.0765254	0.359608	0.0843569	-0.371914	0.0735245	0.478281	0.018075	-0.420057	0.0409892	-0.385451	0.0628671	0.328776	0.116728	0.196073	0.358495	-0.10881	0.612782	0.676365	0.00028499	-0.922681	1.41825e-10	-0.396834	0.0548599	0.294749	0.162061	0.34451	0.0992375	-0.309488	0.141116	0.980696	4.37058e-17	-0.468617	0.0209019	-0.53083	0.00761209	-0.430685	0.0356442	-0.843328	2.28685e-07	0.560292	0.00440544
XLOC_011922	Bra013239	AT3G24830	M1	0.271034	0.200177	0.309998	0.140428	0.306037	0.145836	-0.230777	0.277946	0.438414	0.0321161	-0.243974	0.250604	-0.263684	0.213132	0.0451792	0.833962	0.122981	0.566983	-0.0946523	0.659984	0.555176	0.00486147	-0.645171	0.000663767	-0.176919	0.408233	0.291945	0.16628	0.398697	0.0536285	0.224883	0.290744	0.758718	1.73036e-05	-0.477254	0.01836	-0.643659	0.000689917	0.0826322	0.701082	-0.62244	0.00116199	0.784461	5.7002e-06
XLOC_011934	Bra013223,Bra013224	NA	M1	0.150341	0.483177	0.125905	0.557729	0.124043	0.563614	-0.418333	0.041913	0.485459	0.0161835	-0.296573	0.159357	-0.0847107	0.693913	0.295871	0.160394	0.0526784	0.806872	0.0191802	0.929118	0.242982	0.252596	-0.484639	0.0163911	-0.387253	0.0615428	0.406341	0.0487985	0.0456901	0.83211	-0.0947679	0.659593	0.593121	0.00225246	-0.344113	0.0996529	-0.369358	0.0756826	-0.215748	0.311295	-0.466421	0.021592	0.470007	0.0204748
XLOC_011937	Bra013219	AT3G25470	M1	-0.311696	0.138153	-0.48464	0.0163909	-0.384466	0.0635996	0.248068	0.24249	0.0354259	0.869466	0.125714	0.55833	0.53004	0.00771949	-0.26337	0.213697	0.439774	0.0315249	-0.104798	0.626016	-0.395952	0.0554506	0.0323086	0.880868	-0.587246	0.00255289	0.625432	0.00108208	-0.122658	0.56801	0.232689	0.273872	0.19195	0.368889	0.239932	0.258786	-0.0889211	0.679469	-0.404265	0.0500755	-0.300731	0.153312	0.0218207	0.919388
XLOC_011942	Bra013206	NA	M1	0.367469	0.0773077	0.435326	0.0334907	0.394061	0.0567331	-0.363145	0.0811285	0.39852	0.0537444	-0.311997	0.137753	-0.441042	0.0309821	0.294954	0.161756	0.215196	0.312564	-0.0719388	0.738345	0.735421	4.23194e-05	-0.775592	8.49269e-06	-0.152003	0.478298	-0.0543673	0.8008	0.42818	0.0368511	-0.394738	0.0562713	0.817082	1.1037e-06	-0.216144	0.310385	-0.283458	0.179516	-0.262832	0.21467	-0.675906	0.000288765	0.393764	0.0569372
XLOC_011965	Bra013169	NA	M1	0.370035	0.0751062	0.273462	0.196018	0.335414	0.109094	-0.396306	0.055213	0.533484	0.00726038	-0.463341	0.0225903	-0.221278	0.29875	0.198374	0.35277	0.154575	0.470794	0.094494	0.660519	0.479236	0.0178136	-0.828774	5.65554e-07	-0.466327	0.0216216	0.373221	0.0724401	0.14851	0.488583	-0.24852	0.241605	0.878183	1.70177e-08	-0.479552	0.0177277	-0.530568	0.00764755	-0.427955	0.0369609	-0.764678	1.35471e-05	0.538536	0.00662826
XLOC_011982	Bra013132	AT2G14045	M1	0.213133	0.317338	0.275908	0.191888	0.26371	0.213086	-0.356158	0.0875991	0.444947	0.0293559	-0.096134	0.65498	-0.232027	0.275277	0.00551962	0.979579	0.092716	0.666544	-0.0978932	0.649058	0.477805	0.0182066	-0.342117	0.101763	0.0393353	0.855202	0.0301663	0.888718	0.372737	0.0728404	0.239096	0.260499	0.473882	0.0193207	0.0996705	0.643096	-0.596641	0.00208727	0.00487491	0.981964	-0.349749	0.0938686	0.338117	0.106092
XLOC_011987	Bra013125	AT2G14530	M1	0.192885	0.366517	0.30744	0.143903	0.266469	0.208159	-0.174404	0.415034	0.119208	0.579027	-0.171571	0.422772	-0.19761	0.354663	0.0669253	0.75602	-0.0202092	0.925325	0.0562553	0.794025	0.257716	0.224056	-0.132382	0.537474	0.14193	0.508255	-0.198322	0.352898	0.00682131	0.974764	-0.0140373	0.948094	0.159359	0.457002	0.545554	0.00582699	-0.187259	0.380926	-0.413747	0.0444498	-0.0365768	0.865262	-0.305127	0.1471
XLOC_012047	Bra013026	AT5G23240	M1	0.123552	0.565172	0.154237	0.471778	0.12275	0.567717	-0.300723	0.153324	0.297648	0.157778	-0.185978	0.38425	-0.162024	0.449409	0.132346	0.537585	0.478766	0.0179419	-0.269595	0.20267	0.526321	0.00824212	-0.8111	1.52636e-06	-0.562962	0.0041821	0.364545	0.0798759	0.466941	0.0214269	-0.370973	0.0743141	0.94986	1.37497e-12	-0.331886	0.113104	-0.432222	0.0349192	-0.464379	0.0222497	-0.936226	1.81764e-11	0.503699	0.0120934
XLOC_012067	Bra012986	AT5G61030	M1	-0.0126686	0.95315	-0.141602	0.509247	-0.0841738	0.695762	-0.113398	0.597786	0.195365	0.360268	-0.182323	0.393828	0.207515	0.33056	0.0430972	0.841517	0.517923	0.0095311	-0.0533132	0.804589	0.0784454	0.715597	-0.601367	0.00188181	-0.806515	1.94217e-06	0.626267	0.00106064	0.0798945	0.710562	-0.302856	0.150287	0.774787	8.7981e-06	-0.264676	0.211351	-0.202348	0.343009	-0.571235	0.00354962	-0.81067	1.56162e-06	0.403388	0.0506225
XLOC_012068	Bra012980	AT5G61170	M1	0.526302	0.00824477	0.591924	0.00231107	0.569603	0.00366755	-0.40676	0.0485439	0.552121	0.00515221	-0.487926	0.0155721	-0.603369	0.00180015	0.356206	0.0875531	-0.02989	0.889732	-0.022086	0.918411	0.846679	1.83269e-07	-0.889159	6.35058e-09	-0.0601401	0.78013	0.0348556	0.87155	0.375144	0.0708657	-0.178291	0.404549	0.870944	3.10059e-08	-0.457579	0.024558	-0.620895	0.00120517	-0.21845	0.305125	-0.657676	0.000478387	0.547737	0.00559491
XLOC_012077	Bra012964	NA	M1	0.376247	0.0699738	0.393175	0.0573423	0.382115	0.0653755	-0.340576	0.103415	0.406827	0.0485035	-0.406231	0.0488658	-0.409671	0.0468037	0.298612	0.156372	0.233545	0.272059	-0.0922679	0.668065	0.708235	0.000107764	-0.938473	1.23803e-11	-0.366389	0.0782496	0.191396	0.3703	0.378112	0.0684867	-0.41871	0.0417095	0.964793	3.01597e-14	-0.473534	0.0194221	-0.434923	0.0336732	-0.417243	0.0425054	-0.851281	1.34064e-07	0.517399	0.00961678
XLOC_012101	Bra012925	NA	M1	0.46535	0.0219348	0.551091	0.00525348	0.511274	0.0106663	-0.383942	0.0639925	0.452422	0.026434	-0.451986	0.0265977	-0.641438	0.000729922	0.359257	0.0846833	0.0186448	0.931091	-0.1478	0.490688	0.857173	8.84522e-08	-0.905852	1.14227e-09	-0.080766	0.707539	0.00262838	0.990275	0.422901	0.039501	-0.293145	0.164465	0.867629	4.03271e-08	-0.357776	0.0860673	-0.567933	0.00379161	-0.425503	0.0381765	-0.68887	0.000197388	0.364206	0.0801774
XLOC_012105	Bra012916	AT3G49910	M1	0.601341	0.0018829	0.635629	0.000844143	0.634709	0.000863581	-0.428114	0.0368836	0.619983	0.00123133	-0.586741	0.00258021	-0.646557	0.000640554	0.444472	0.0295498	-0.148719	0.487965	0.0754333	0.7261	0.846747	1.82444e-07	-0.911087	6.242e-10	-0.0340438	0.874519	0.0459491	0.831172	0.268368	0.204812	-0.176841	0.408442	0.859321	7.56553e-08	-0.542417	0.00617446	-0.617045	0.00131886	-0.207018	0.331744	-0.602868	0.00182029	0.568439	0.00375367
XLOC_012154	Bra012819	AT3G52130	M1	-0.0137643	0.949102	0.10483	0.625911	0.028848	0.893554	-0.240961	0.256686	0.0421519	0.844952	0.076192	0.72345	-0.0417553	0.846393	-0.0261378	0.903506	0.0336979	0.875784	-0.0538388	0.802699	0.10539	0.624057	0.0348534	0.871558	0.0886755	0.680309	-0.171557	0.422809	0.163055	0.446493	-0.0459942	0.831008	0.0129869	0.951974	0.153982	0.472519	-0.0640013	0.766384	0.101029	0.638555	0.00278669	0.989689	0.00494312	0.981711
XLOC_012159	Bra012807	AT3G52380	M1	-0.0831098	0.699432	-0.178933	0.402831	-0.141398	0.509864	0.0913383	0.671226	0.108597	0.613481	-0.126984	0.55433	0.151343	0.480232	0.0219516	0.918906	0.522185	0.00885755	-0.261452	0.217175	0.135328	0.528375	-0.676982	0.000279985	-0.823513	7.6864e-07	0.77153	1.01346e-05	0.227456	0.285113	-0.131231	0.541047	0.844558	2.10968e-07	-0.557851	0.00461832	-0.324242	0.122163	-0.446001	0.0289292	-0.903956	1.40956e-09	0.623438	0.00113478
XLOC_012173	Bra012788	AT4G15440	M1	0.38958	0.0598653	0.429914	0.0360124	0.404387	0.0499999	-0.348404	0.0952259	0.43591	0.0332272	-0.437981	0.0323062	-0.477907	0.0181784	0.445137	0.0292786	0.16107	0.452121	-0.109682	0.609919	0.741313	3.4052e-05	-0.934445	2.44023e-11	-0.322385	0.12444	0.164005	0.443813	0.343172	0.100644	-0.463075	0.0226782	0.947731	2.15063e-12	-0.437988	0.0323029	-0.41213	0.0453721	-0.462945	0.0227212	-0.79552	3.37617e-06	0.451774	0.0266777
XLOC_012194	Bra012760	NA	M1	-0.0596276	0.78196	-0.159883	0.455502	-0.0996557	0.643146	0.038974	0.856518	0.218295	0.305476	0.0640185	0.766323	0.211252	0.321727	-0.201359	0.345421	0.485592	0.0161501	-0.12559	0.558722	0.0694334	0.747162	-0.242996	0.252568	-0.393859	0.0568721	0.288947	0.170875	0.238209	0.262325	0.0760918	0.7238	0.441695	0.0307051	0.164678	0.441916	-0.224343	0.291933	-0.212482	0.318853	-0.502468	0.0123396	0.221055	0.29925
XLOC_012215	Bra012724	AT4G16380	M1	0.00413079	0.984716	-0.21079	0.322812	-0.0552347	0.797685	0.604429	0.00175814	-0.00814231	0.969879	-0.0793085	0.712597	0.258325	0.222924	0.0224199	0.917182	0.230388	0.278779	0.118272	0.582031	-0.133275	0.534709	-0.154012	0.472432	-0.350545	0.0930719	0.451218	0.0268883	-0.18586	0.384558	0.177296	0.407219	0.252008	0.234846	-0.117981	0.582968	-0.00543653	0.979886	-0.129496	0.546455	-0.237457	0.263879	0.247694	0.243224
XLOC_012231	Bra012695	NA	M1	0.341112	0.102838	0.301619	0.152043	0.331061	0.114057	-0.326715	0.119175	0.355264	0.0884545	-0.385728	0.0626622	-0.234961	0.26908	0.276917	0.190202	-0.103572	0.630084	0.225418	0.289566	0.371817	0.0736061	-0.541412	0.00628945	-0.165318	0.440121	0.19738	0.355236	0.0241464	0.910828	-0.0740267	0.731021	0.544795	0.00590946	-0.667974	0.000361194	-0.21671	0.309089	0.18749	0.380327	-0.370695	0.0745477	0.719052	7.52476e-05
XLOC_012248	Bra012659	AT4G17520	M1	0.422934	0.0394837	0.437513	0.0325123	0.438273	0.0321777	-0.335937	0.108508	0.511589	0.0106102	-0.484756	0.0163613	-0.459918	0.0237431	0.382045	0.0654289	0.109546	0.610364	-0.0496823	0.817671	0.713467	9.0761e-05	-0.895891	3.2922e-09	-0.274688	0.193941	0.201903	0.344092	0.270623	0.200887	-0.25635	0.226608	0.933534	2.82806e-11	-0.283538	0.179388	-0.518136	0.00949647	-0.521562	0.00895345	-0.741328	3.40332e-05	0.403851	0.050333
XLOC_012258	Bra012642	AT4G17770	M1	0.528876	0.00788004	0.36746	0.0773157	0.454955	0.0254989	-0.000174548	0.999354	0.369462	0.0755941	-0.74076	3.47616e-05	-0.362684	0.0815434	0.741398	3.3944e-05	-0.263908	0.212729	0.397885	0.0541624	0.323097	0.123563	-0.727163	5.68628e-05	-0.304676	0.147729	0.259852	0.220105	-0.413985	0.0443148	-0.453998	0.0258491	0.580506	0.00293884	-0.5961	0.00211196	0.00190583	0.992948	-0.50385	0.0120635	-0.342824	0.101012	0.237126	0.264564
XLOC_012264	Bra012634	AT4G17890	M1	0.0290216	0.892917	0.248831	0.240998	0.141672	0.509035	-0.546747	0.00569919	0.305155	0.147061	0.105848	0.62254	-0.208843	0.327405	-0.192244	0.368143	0.0447647	0.835465	-0.295605	0.160788	0.418818	0.0416514	-0.183019	0.391993	0.119601	0.577768	-0.0552263	0.797716	0.568621	0.00374006	0.16945	0.428614	0.283447	0.179534	-0.13098	0.541828	-0.661039	0.00043694	0.266013	0.208968	-0.26279	0.214744	0.414216	0.0441849
XLOC_012269	Bra012627	AT4G17970	M1	0.270389	0.201292	0.365276	0.0792281	0.292807	0.164975	-0.287314	0.173415	0.214795	0.313488	-0.33051	0.114697	-0.408011	0.0477902	0.272714	0.197294	0.201511	0.345051	-0.221607	0.298012	0.640484	0.000747713	-0.865546	4.74024e-08	-0.351905	0.0917234	0.218036	0.306065	0.397525	0.0544008	-0.389448	0.0599591	0.863309	5.62217e-08	-0.552449	0.00512033	-0.423358	0.0392657	-0.397498	0.0544186	-0.797015	3.13777e-06	0.476983	0.0184356
XLOC_012297	Bra012581	AT4G18710	M1	0.214634	0.31386	-0.068218	0.751451	0.093475	0.663969	0.125707	0.558351	0.239234	0.260215	-0.432404	0.034834	-0.0309233	0.885943	0.312246	0.137422	0.145746	0.496801	0.136118	0.525947	0.0861048	0.689119	-0.590073	0.00240434	-0.567921	0.00379255	0.444267	0.0296342	-0.251778	0.235288	-0.39277	0.0576223	0.552947	0.00507224	-0.272637	0.197424	-0.0449674	0.83473	-0.768003	1.17819e-05	-0.521882	0.00890404	0.0251353	0.907191
XLOC_012298	Bra012580,tRNA-Glu	NA	M1	0.333064	0.111754	0.3211	0.126035	0.332762	0.112098	-0.319545	0.127983	0.494067	0.0141317	-0.385852	0.0625701	-0.352962	0.0906848	0.230725	0.278056	0.228132	0.283643	-0.14098	0.511129	0.658235	0.000471275	-0.901625	1.81463e-09	-0.393619	0.0570365	0.328812	0.116685	0.377583	0.0689064	-0.19031	0.373072	0.974341	9.71463e-16	-0.421539	0.0402083	-0.619516	0.00124489	-0.435295	0.0335046	-0.855609	9.89482e-08	0.553619	0.00500784
XLOC_012310	Bra012553	AT4G19210	M1	0.657304	0.000483172	0.631825	0.00092702	0.651304	0.000566295	-0.544705	0.00591931	0.624522	0.00110587	-0.717117	8.03361e-05	-0.638284	0.000790167	0.599208	0.00197342	-0.209844	0.325038	0.217969	0.306219	0.744643	3.00385e-05	-0.900973	1.94543e-09	-0.109479	0.610585	-0.0164773	0.939087	0.0135847	0.949766	-0.497525	0.0133697	0.785289	5.48668e-06	-0.336127	0.108296	-0.445979	0.028938	-0.594559	0.00218367	-0.528696	0.00790503	0.185124	0.386477
XLOC_012328	Bra012523	AT4G20010	M1	-0.196491	0.357451	-0.326824	0.119046	-0.272561	0.197555	0.123009	0.566895	0.0453441	0.833364	0.030482	0.887561	0.392177	0.058034	-0.151346	0.480225	0.610922	0.0015186	-0.188073	0.378822	-0.0645578	0.764409	-0.466928	0.021431	-0.855027	1.03133e-07	0.818748	1.0063e-06	0.199163	0.350819	-0.0116367	0.956962	0.699822	0.000140975	-0.531141	0.00757019	-0.262447	0.215366	-0.183236	0.391423	-0.813122	1.36965e-06	0.718858	7.5743e-05
XLOC_012347	Bra038786	AT4G21110	M1	-0.362277	0.0819114	-0.374616	0.0712949	-0.389998	0.059567	0.134461	0.531045	-0.0210386	0.922269	0.280805	0.183798	0.430807	0.0355859	-0.244083	0.250386	0.699594	0.000141987	-0.366457	0.0781898	-0.0912352	0.671577	-0.191696	0.369537	-0.658326	0.000470119	0.610225	0.00154292	0.353044	0.0906045	0.108377	0.614203	0.500201	0.0128035	-0.045385	0.833216	-0.210365	0.323811	-0.113444	0.597639	-0.640526	0.000746912	0.473537	0.0194211
XLOC_012349	Bra038784	NA	M1	0.439592	0.0316035	0.495708	0.0137656	0.495086	0.0139034	-0.439028	0.0318479	0.531011	0.00758769	-0.370936	0.0743448	-0.451227	0.026885	0.214297	0.314637	-0.16998	0.42715	0.085594	0.690874	0.646757	0.000637274	-0.590338	0.00239078	0.0865141	0.687713	0.0396195	0.854166	0.281051	0.183398	0.120001	0.576486	0.610956	0.00151742	-0.485217	0.0162446	-0.564721	0.00404023	0.204166	0.338597	-0.380007	0.0670003	0.696795	0.000154945
XLOC_012382	Bra019384	NA	M1	-0.341597	0.102319	-0.332644	0.112233	-0.350826	0.0927924	0.01402	0.948158	0.0586764	0.785358	0.34738	0.0962683	0.323897	0.122583	-0.373777	0.0719817	0.509917	0.0109112	-0.383248	0.0645152	-0.0911449	0.671884	0.0501868	0.81585	-0.299668	0.154841	0.331812	0.11319	0.350751	0.0928668	0.351444	0.0921784	0.223065	0.294764	0.349138	0.0944834	-0.267613	0.206138	-0.0720994	0.737781	-0.340481	0.103518	0.145584	0.497283
XLOC_012439	Bra019295	AT4G23570	M1	0.313782	0.135396	0.313675	0.135536	0.304913	0.147397	-0.302151	0.151286	0.25704	0.225316	-0.32941	0.115982	-0.18647	0.382971	0.396998	0.0547503	-0.208038	0.329314	0.294595	0.162291	0.246366	0.245843	-0.302485	0.150812	-0.0252533	0.906758	0.0612979	0.776001	-0.127779	0.551831	-0.162786	0.447254	0.276248	0.191319	-0.502813	0.0122702	-0.064784	0.763606	0.279082	0.186618	-0.0994531	0.643824	0.5015	0.0125359
XLOC_012450	Bra019275	AT4G23710	M1	0.0156339	0.9422	0.00852215	0.968475	-0.00153374	0.994325	-0.0124499	0.953957	0.189135	0.376086	-0.103698	0.629665	-0.0519381	0.809538	0.0832056	0.699102	0.509675	0.0109553	-0.31574	0.132844	0.381869	0.0655635	-0.694069	0.000168544	-0.573397	0.00339835	0.485321	0.0162182	0.409664	0.0468081	-0.128264	0.55031	0.865686	4.68964e-08	-0.294206	0.162872	-0.361942	0.0822155	-0.394802	0.0562276	-0.865392	4.79679e-08	0.519722	0.00924185
XLOC_012469	Bra019253,Bra019254	NA	M1	0.370566	0.0746568	0.282372	0.181261	0.316556	0.131791	-0.0241076	0.910971	0.285463	0.176326	-0.547443	0.00562568	-0.26763	0.20611	0.648274	0.000612787	0.0386986	0.857522	0.190201	0.373351	0.361057	0.0830225	-0.712047	9.51242e-05	-0.399366	0.0531917	0.244828	0.248897	-0.183424	0.390928	-0.509784	0.0109354	0.684111	0.000227466	-0.298628	0.156349	0.023388	0.913619	-0.589683	0.00242438	-0.500059	0.0128331	0.178309	0.404501
XLOC_012477	Bra019243	AT4G24160	M1	0.523811	0.00861113	0.494229	0.0140951	0.51004	0.0108888	-0.304711	0.147679	0.30066	0.153414	-0.544882	0.00589995	-0.60362	0.0017901	0.618348	0.00127941	-0.107789	0.616138	0.159658	0.456147	0.656599	0.000492357	-0.732858	4.64357e-05	-0.0120771	0.955335	-0.24923	0.240218	0.0156272	0.942224	-0.687024	0.000208616	0.588686	0.00247628	-0.176923	0.408221	0.120931	0.573512	-0.494766	0.0139747	-0.383463	0.0643527	-0.00383143	0.985824
XLOC_012482	Bra019231	NA	M1	-0.155966	0.466763	-0.214952	0.313125	-0.179181	0.402169	0.0689968	0.748702	0.182737	0.392736	-0.0137653	0.949099	0.222439	0.296155	-0.0941796	0.661583	0.425734	0.0380605	-0.28043	0.18441	0.0562774	0.793945	-0.435003	0.0336371	-0.64785	0.000619542	0.782483	6.24001e-06	0.230322	0.27892	0.270223	0.20158	0.677283	0.000277576	-0.34557	0.0981332	-0.507198	0.0114159	-0.229312	0.281092	-0.698261	0.000148036	0.643818	0.000687113
XLOC_012491	Bra019212,Bra019213	NA	M1	-0.215475	0.311923	-0.0811675	0.706149	-0.174754	0.414084	-0.0794404	0.712139	-0.224969	0.290554	0.255635	0.227951	0.119928	0.576722	-0.164429	0.442619	0.547858	0.00558227	-0.301147	0.152717	0.138847	0.517606	-0.201484	0.345115	-0.312196	0.137489	0.0191989	0.929049	0.440355	0.0312753	-0.388242	0.0608253	0.346184	0.097497	-0.00494985	0.981686	0.2243	0.292028	-0.0541738	0.801495	-0.465461	0.0218991	0.209845	0.325036
XLOC_012494	Bra019201	AT4G24950	M1	0.532439	0.00739724	0.581097	0.00290311	0.566763	0.00388061	-0.333919	0.11078	0.513869	0.0102106	-0.540698	0.00637211	-0.602205	0.00184724	0.448991	0.027745	-0.0352187	0.870223	0.00784887	0.970964	0.819713	9.53475e-07	-0.933923	2.65627e-11	-0.128183	0.550564	0.0757644	0.724943	0.296705	0.159162	-0.278932	0.186865	0.897583	2.77188e-09	-0.521484	0.00896542	-0.496213	0.0136547	-0.29511	0.161523	-0.674879	0.000297372	0.534977	0.00706859
XLOC_012504	Bra019183	AT4G25210	M1	0.66278	0.00041674	0.519183	0.00932765	0.597759	0.00203703	-0.506739	0.011503	0.698728	0.000145891	-0.727255	5.66792e-05	-0.455149	0.0254284	0.474747	0.0190702	-0.231403	0.276608	0.420877	0.0405556	0.554746	0.00490155	-0.773928	9.13439e-06	-0.130361	0.543755	0.0726389	0.735887	-0.152149	0.477871	-0.28499	0.177074	0.683116	0.000234243	-0.381195	0.066081	-0.414193	0.0441978	-0.37537	0.0706816	-0.43001	0.035966	0.302886	0.150245
XLOC_012542	Bra019122	AT4G26070	M1	0.0982178	0.647968	0.110878	0.606002	0.0724076	0.736699	0.118207	0.582242	-0.240427	0.257775	-0.220802	0.299816	-0.208926	0.327207	0.398119	0.0540082	0.0831362	0.699341	-0.0238368	0.911967	0.169418	0.428703	-0.429455	0.0362325	-0.266952	0.207304	-0.0239941	0.911389	-0.039243	0.855538	-0.702737	0.000128576	0.294833	0.161936	-0.42613	0.0378626	0.497608	0.0133519	-0.331831	0.113167	-0.298367	0.156729	0.0194908	0.927973
XLOC_012546	Bra019116	NA	M1	0.421286	0.0403407	0.45852	0.0242275	0.453105	0.0261792	-0.284521	0.177819	0.417764	0.0422212	-0.386458	0.0621243	-0.515616	0.00991313	0.379205	0.0676266	0.0672973	0.754704	-0.0662104	0.75855	0.725154	6.10028e-05	-0.764626	1.35763e-05	-0.0928601	0.666055	-0.0356988	0.868469	0.307973	0.143175	-0.40357	0.0505083	0.741942	3.32599e-05	-0.207207	0.331293	-0.37953	0.0673721	-0.420689	0.040655	-0.58471	0.00269272	0.233141	0.272914
XLOC_012563	Bra019083	AT4G26840	M1	0.159614	0.456271	0.421503	0.040227	0.277063	0.189958	-0.293537	0.163875	0.153948	0.472617	-0.0725184	0.73631	-0.466767	0.0214819	0.0484668	0.822061	0.0352468	0.87012	-0.321954	0.124973	0.634399	0.000870228	-0.430444	0.0357589	0.179126	0.402316	-0.157956	0.461024	0.553532	0.00501621	0.0738937	0.731487	0.471651	0.0199783	-0.0740237	0.731032	-0.462831	0.0227591	-0.00659707	0.975593	-0.359414	0.0845367	0.310959	0.139137
XLOC_012568	Bra019071	AT4G27080	M1	0.263575	0.213329	0.240165	0.25831	0.246495	0.245587	-0.354747	0.088952	0.45503	0.0254716	-0.351851	0.0917764	-0.240406	0.257818	0.283161	0.179992	0.301208	0.15263	-0.111789	0.603029	0.541919	0.00623127	-0.835432	3.77803e-07	-0.502044	0.0124253	0.354607	0.0890872	0.286509	0.174677	-0.359592	0.0843719	0.930617	4.47408e-11	-0.31447	0.134496	-0.456556	0.0249216	-0.537678	0.00673226	-0.837726	3.27439e-07	0.43543	0.0334437
XLOC_012623	Bra024196	NA	M1	0.142567	0.506335	-1.75155e-05	0.999935	0.0841492	0.695847	-0.347841	0.0957981	0.562436	0.00422526	-0.10066	0.639784	0.0654393	0.761282	-0.163872	0.444185	0.235818	0.267288	0.00146344	0.994585	0.220928	0.299535	-0.35059	0.0930272	-0.282669	0.180782	0.386763	0.0619004	0.23582	0.267283	0.305069	0.147181	0.533688	0.00723396	-0.0944333	0.660725	-0.703128	0.00012699	-0.0324312	0.880419	-0.497081	0.0134655	0.486737	0.0158643
XLOC_012640	Bra024164	AT4G29100	M1	0.106529	0.62029	-0.0173315	0.935935	0.0662792	0.758307	-0.310196	0.140161	0.353083	0.0905665	-0.104356	0.627483	0.1731	0.418587	-0.202049	0.343736	0.357972	0.0858835	0.0828204	0.700432	0.128482	0.549628	-0.370893	0.0743809	-0.430915	0.0355347	0.369026	0.0759667	0.133021	0.535492	0.00729249	0.973022	0.538116	0.00667896	-0.0668737	0.756203	-0.422103	0.0399143	-0.18157	0.395819	-0.55188	0.00517582	0.39468	0.0563106
XLOC_012642	Bra024163	AT4G29110	M1	-0.112721	0.599991	0.0862951	0.688465	-0.0661993	0.75859	-0.173129	0.418508	-0.0857336	0.690394	0.0589891	0.78424	-0.0562153	0.794168	0.0278466	0.89723	0.576399	0.00319739	-0.430353	0.0358021	0.354828	0.0888733	-0.538588	0.00662202	-0.487642	0.0156414	0.184388	0.388401	0.523553	0.00864984	-0.463537	0.0225257	0.677468	0.000276102	-0.0909981	0.672384	-0.133933	0.532674	-0.434016	0.0340878	-0.758379	1.75425e-05	0.235366	0.268232
XLOC_012650	Bra024154	NA	M1	0.187159	0.381184	0.0960581	0.655236	0.158701	0.458886	-0.0181728	0.932832	0.329739	0.115597	-0.227369	0.285301	0.0804806	0.708529	0.00965119	0.9643	0.261311	0.217432	0.128829	0.548542	0.199079	0.351026	-0.488827	0.0153535	-0.423606	0.0391385	0.438727	0.0319794	0.0760817	0.723835	0.0665377	0.757392	0.621721	0.00118193	-0.359709	0.0842638	-0.36383	0.0805139	-0.0614293	0.775533	-0.555326	0.00484754	0.606348	0.00168419
XLOC_012678	Bra024112	AT4G30020	M1	0.292321	0.16571	0.306096	0.145755	0.295456	0.161009	-0.250781	0.237209	0.355933	0.0878137	-0.358173	0.0856949	-0.333276	0.111511	0.300936	0.153019	0.300876	0.153104	-0.158481	0.459518	0.638483	0.000786237	-0.904474	1.33144e-09	-0.446798	0.0286095	0.295146	0.161469	0.359403	0.0845471	-0.392947	0.0575	0.967559	1.24216e-14	-0.398466	0.0537796	-0.438273	0.0321777	-0.516599	0.00974884	-0.872112	2.82148e-08	0.468553	0.0209217
XLOC_012728	Bra024017,Bra024018	NA	M1	0.104484	0.627056	0.0172762	0.936139	0.0488855	0.820548	-0.0637147	0.767402	0.210199	0.324202	-0.287064	0.173807	-0.0264377	0.902404	0.198842	0.35161	0.428272	0.0368064	-0.13069	0.542732	0.309102	0.141638	-0.807854	1.81141e-06	-0.732863	4.64267e-05	0.592969	0.00225983	0.187431	0.380479	-0.335433	0.109072	0.920602	1.88043e-10	-0.529538	0.00778828	-0.26931	0.203167	-0.519593	0.0092622	-0.905563	1.17983e-09	0.559475	0.00447573
XLOC_012730	Bra024014,Bra024015	NA	M1	-0.212989	0.317671	-0.21094	0.32246	-0.238795	0.261118	-0.223525	0.293743	0.0851902	0.692263	0.114409	0.594506	0.19655	0.357305	-0.113326	0.598022	0.366023	0.0785704	-0.291846	0.16643	0.00968042	0.964192	-0.239801	0.259053	-0.487081	0.0157793	0.496686	0.0135513	0.286639	0.174472	0.0355114	0.869153	0.418568	0.0417861	-0.289652	0.169787	-0.296928	0.158835	-0.054408	0.800654	-0.496224	0.0136523	0.467616	0.0212143
XLOC_012735	Bra024005	NA	M1	0.476008	0.0187103	0.609576	0.00156582	0.5385	0.00663263	-0.465867	0.0217686	0.458773	0.0241393	-0.49005	0.0150608	-0.564157	0.00408521	0.595749	0.00212814	-0.225436	0.289528	0.133864	0.532886	0.669292	0.000348168	-0.670436	0.000337192	0.0141032	0.947851	-0.103758	0.629467	0.135075	0.529155	-0.439753	0.0315343	0.594497	0.0021866	-0.524228	0.00854887	-0.219047	0.303772	-0.0528673	0.806192	-0.350227	0.0933899	0.446001	0.028929
XLOC_012744	Bra023984	AT4G31780	M1	0.440204	0.03134	0.527163	0.00812122	0.503668	0.0120995	-0.471073	0.0201517	0.580746	0.0029243	-0.273157	0.196538	-0.546841	0.00568916	0.221467	0.298327	-0.0192991	0.928679	-0.0656485	0.760541	0.810931	1.54012e-06	-0.619617	0.00124195	0.15611	0.466345	-0.159704	0.456016	0.499496	0.0129508	-0.0499275	0.816786	0.646871	0.000635403	-0.199465	0.350074	-0.601967	0.00185701	0.0458471	0.831541	-0.456389	0.024981	0.45841	0.0242662
XLOC_012749	Bra023980	NA	M1	0.268505	0.204572	0.257362	0.224716	0.256986	0.225418	-0.013512	0.950034	0.18912	0.376124	-0.441123	0.0309476	-0.305861	0.146081	0.43815	0.0322319	0.143889	0.50236	-0.0902231	0.675024	0.453074	0.0261907	-0.81727	1.09229e-06	-0.464617	0.0221722	0.351183	0.0924376	0.0789393	0.71388	-0.436046	0.0331662	0.796648	3.19481e-06	-0.437184	0.0326582	-0.282972	0.180295	-0.675427	0.000292754	-0.698664	0.000146182	0.267126	0.206997
XLOC_012755	Bra023969	AT4G31990	M1	-0.0716716	0.739284	-0.0125512	0.953583	-0.0481991	0.823029	-0.201395	0.345334	0.286084	0.175346	0.0374055	0.862237	0.0212063	0.921651	-0.178278	0.404583	0.418613	0.0417619	-0.386747	0.0619128	0.296887	0.158895	-0.449263	0.0276392	-0.406889	0.048466	0.455104	0.0254444	0.497087	0.0134643	0.236425	0.266022	0.678088	0.00027121	-0.100614	0.639939	-0.660025	0.000449102	-0.216546	0.309465	-0.692251	0.00017818	0.50494	0.0118495
XLOC_012767	Bra023953	AT4G32330	M1	0.316011	0.132493	0.477618	0.0182585	0.391445	0.0585456	-0.422696	0.0396067	0.392166	0.058042	-0.266472	0.208153	-0.535447	0.00700907	0.208231	0.328855	0.145068	0.498826	-0.283745	0.179057	0.824117	7.4243e-07	-0.813637	1.33212e-06	-0.104322	0.627596	0.0378048	0.860781	0.600267	0.00192801	-0.204815	0.337029	0.851738	1.29894e-07	-0.374072	0.0717396	-0.615779	0.00135821	-0.225314	0.289795	-0.724309	6.28219e-05	0.513052	0.0103523
XLOC_012796	Bra036992	AT4G33630	M1	0.344278	0.0994795	0.342231	0.101643	0.330418	0.114804	-0.318325	0.129528	0.417352	0.0424455	-0.410652	0.0462283	-0.361112	0.0829726	0.330969	0.114164	0.242671	0.253222	-0.0980859	0.648411	0.641636	0.000726272	-0.920955	1.79352e-10	-0.430984	0.035502	0.260261	0.219352	0.321298	0.125788	-0.441712	0.0306979	0.950618	1.16683e-12	-0.458553	0.0242161	-0.439061	0.0318337	-0.50614	0.0116174	-0.849266	1.53928e-07	0.456207	0.0250462
XLOC_012827	Bra017632	NA	M1	0.275864	0.191962	0.225639	0.289082	0.273275	0.196335	0.0299579	0.889482	0.218044	0.306047	-0.287248	0.173519	-0.383577	0.0642668	0.388819	0.0604094	0.0413407	0.847901	-0.0805338	0.708345	0.497182	0.0134438	-0.586253	0.00260687	-0.115965	0.589467	0.0208284	0.923043	0.17287	0.419215	-0.420356	0.0408309	0.514045	0.0101804	-0.322217	0.124647	-0.119108	0.579347	-0.336327	0.108073	-0.420587	0.0407089	0.15258	0.47661
XLOC_012833	Bra017641	AT4G34250	M1	0.326912	0.11894	0.406565	0.0486626	0.373078	0.0725577	-0.206754	0.332375	0.329	0.116464	-0.299667	0.154843	-0.557299	0.00466765	0.191244	0.370686	-0.170539	0.425608	-0.200553	0.347397	0.612654	0.00145966	-0.580662	0.00292939	0.0994648	0.643785	-0.0117804	0.956431	0.34843	0.0951993	-0.0168616	0.937669	0.477722	0.0182297	-0.444516	0.0295322	-0.586531	0.00259166	-0.16637	0.437175	-0.372685	0.0728835	0.279437	0.186034
XLOC_012836	Bra017644	AT4G34290	M1	-0.266523	0.208064	-0.361592	0.0825342	-0.334067	0.110612	0.0974163	0.650662	0.0319587	0.88215	0.0738161	0.731759	0.404489	0.0499364	-0.145919	0.496285	0.653067	0.000540685	-0.271561	0.19927	-0.0794163	0.712222	-0.450104	0.0273142	-0.88904	6.42214e-09	0.834776	3.93425e-07	0.233951	0.271203	-0.0410105	0.849102	0.70053	0.000137872	-0.467619	0.0212134	-0.252192	0.234493	-0.253869	0.231292	-0.832763	4.45042e-07	0.663521	0.000408389
XLOC_012852	Bra017669	AT4G34670	M1	0.0762026	0.723413	0.0758451	0.724661	0.0843357	0.695204	-0.113678	0.596877	0.302228	0.151176	-0.133512	0.533974	-0.119721	0.577383	-0.0404842	0.851018	0.402513	0.0511731	-0.331245	0.113844	0.465967	0.0217366	-0.747047	2.7407e-05	-0.508819	0.0111128	0.528675	0.00790795	0.503517	0.0121295	0.0432646	0.840909	0.900586	2.02684e-09	-0.51623	0.00981023	-0.66271	0.000417537	-0.242866	0.25283	-0.896018	3.25027e-09	0.725962	5.93064e-05
XLOC_012873	Bra017709	AT4G35335	M1	0.401888	0.0515689	0.308142	0.142944	0.387816	0.0611336	-0.110911	0.605895	0.522522	0.00880595	-0.356245	0.0875164	-0.229682	0.280296	0.184311	0.388603	0.0346966	0.872131	0.198975	0.351282	0.422381	0.0397699	-0.509804	0.0109319	-0.0863659	0.688222	0.0851082	0.692545	0.0762187	0.723357	0.0346054	0.872465	0.544338	0.00595972	-0.0845814	0.694358	-0.400446	0.0524921	-0.171474	0.423037	-0.382778	0.0648713	0.296901	0.158874
XLOC_012899	Bra017749	AT4G36130	M1	0.0695755	0.746661	0.0615876	0.774969	0.0735495	0.732693	-0.125057	0.560405	0.334741	0.10985	-0.168367	0.431613	-0.0821162	0.702865	0.0224119	0.917212	0.367613	0.0771835	-0.288877	0.170983	0.412901	0.0449303	-0.723134	6.5431e-05	-0.544494	0.00594251	0.598301	0.00201304	0.409901	0.0466681	0.0696069	0.746551	0.895679	3.36341e-09	-0.486782	0.0158533	-0.65725	0.000483869	-0.281055	0.183392	-0.861946	6.22911e-08	0.719345	7.45024e-05
XLOC_012983	Bra017905	NA	M1	0.240657	0.257306	0.191992	0.368784	0.247193	0.24421	0.175797	0.41126	0.101932	0.635541	-0.264616	0.21146	-0.227334	0.285376	0.382412	0.0651495	-0.202478	0.342691	0.222003	0.297128	0.216095	0.310498	-0.260705	0.218539	0.0569769	0.791439	-0.00862345	0.9681	-0.111326	0.604539	-0.113576	0.597209	0.18626	0.383517	-0.464956	0.0220622	0.201968	0.343935	0.204453	0.337903	-0.021231	0.92156	0.353821	0.0898474
XLOC_012990	Bra005668	AT5G01750	M1	0.150817	0.481777	0.104314	0.62762	0.11915	0.579215	-0.214685	0.313741	0.297308	0.158276	-0.254445	0.230199	-0.0705919	0.743081	0.146201	0.495444	0.466692	0.0215057	-0.126299	0.556488	0.416989	0.0426444	-0.816345	1.14938e-06	-0.656325	0.00049597	0.460687	0.0234803	0.308209	0.142852	-0.381329	0.0659781	0.947203	2.39608e-12	-0.431417	0.0352972	-0.334496	0.110127	-0.46054	0.0235302	-0.928937	5.77519e-11	0.560656	0.00437435
XLOC_013001	Bra005691	AT5G01290	M1	0.467249	0.0213297	0.44697	0.0285409	0.443362	0.0300075	-0.337423	0.106857	0.375048	0.0709432	-0.51929	0.00931061	-0.50876	0.0111236	0.602409	0.00183891	0.00244493	0.990954	0.0731953	0.733935	0.649274	0.000597092	-0.795261	3.41899e-06	-0.1799	0.400252	-0.000338186	0.998749	0.0833291	0.698675	-0.57196	0.00349828	0.735689	4.19089e-05	-0.240233	0.258169	-0.151475	0.479844	-0.528016	0.00800031	-0.540181	0.00643267	0.159283	0.45722
XLOC_013007	Bra005705	AT5G02050	M1	0.476903	0.0184581	0.381284	0.0660122	0.445062	0.029309	-0.20972	0.32533	0.426753	0.0375529	-0.573627	0.00338262	-0.409765	0.0467484	0.450635	0.0271104	0.0886808	0.68029	0.124909	0.560873	0.610856	0.00152089	-0.952006	8.58358e-13	-0.390171	0.0594444	0.218781	0.304375	0.0951592	0.65827	-0.502371	0.0123592	0.905074	1.24587e-09	-0.569441	0.00367944	-0.23877	0.261169	-0.491913	0.0146238	-0.746223	2.82849e-05	0.454736	0.0255787
XLOC_013021	Bra005735,Bra005736	NA	M1	0.608989	0.00158682	0.632019	0.000922624	0.634273	0.000872922	-0.549779	0.0053849	0.627778	0.00102276	-0.566209	0.00392341	-0.635957	0.000837321	0.469773	0.0205461	-0.259339	0.22105	0.163399	0.44552	0.788906	4.63508e-06	-0.811331	1.50768e-06	0.0394865	0.854651	-0.0204294	0.924514	0.21825	0.305579	-0.233984	0.271135	0.722141	6.77098e-05	-0.695454	0.000161509	-0.531393	0.00753628	0.0234597	0.913355	-0.469914	0.0205029	0.637403	0.000807733
XLOC_013028	Bra005749	AT5G02870	M1	0.498713	0.0131159	0.546594	0.00571537	0.524051	0.00857527	-0.45018	0.027285	0.564379	0.00406742	-0.516534	0.0097595	-0.554767	0.00489958	0.407316	0.0482079	0.0301603	0.88874	-0.0252595	0.906735	0.80645	1.94876e-06	-0.934539	2.40328e-11	-0.189574	0.374958	0.125226	0.559872	0.32693	0.118918	-0.265955	0.209071	0.94065	8.41598e-12	-0.420527	0.0407401	-0.586233	0.00260797	-0.37534	0.0707066	-0.730054	5.13371e-05	0.508185	0.0112305
XLOC_013033	Bra005756	NA	M1	0.0432523	0.840953	0.0428003	0.842595	0.0452887	0.833565	-0.0615027	0.775272	0.0930312	0.665474	-0.0720911	0.73781	0.0375506	0.861708	-0.104462	0.627129	0.42671	0.0375744	-0.0981679	0.648135	0.219781	0.302114	-0.464124	0.0223329	-0.42652	0.0376684	0.201567	0.344913	0.257004	0.225383	-0.304202	0.148392	0.55594	0.00479097	-0.103919	0.628932	-0.165972	0.438288	-0.386428	0.0621462	-0.616253	0.00134337	0.213267	0.317025
XLOC_013035	Bra005759	AT5G02590	M1	0.274374	0.194471	0.222435	0.296166	0.250336	0.23807	-0.241529	0.255532	0.433708	0.0342292	-0.394429	0.056482	-0.21496	0.313108	0.248132	0.242364	0.256921	0.225538	-0.0698266	0.745776	0.505631	0.0117153	-0.871928	2.86392e-08	-0.534337	0.00715027	0.482195	0.0170227	0.244553	0.249445	-0.187595	0.380056	0.968582	8.77354e-15	-0.516754	0.00972303	-0.501527	0.0125305	-0.42293	0.0394856	-0.858631	7.9574e-08	0.632355	0.000915067
XLOC_013037	Bra005762,Bra005764	NA	M1	-0.159849	0.4556	-0.22689	0.286344	-0.189533	0.375064	-0.0666939	0.756839	0.176327	0.409828	0.159841	0.455623	0.287675	0.172851	-0.191788	0.369303	0.650306	0.000581269	-0.231057	0.277345	0.0950061	0.658788	-0.308826	0.142013	-0.566118	0.00393042	0.403501	0.0505517	0.37137	0.0739799	-0.11029	0.607926	0.567079	0.00385642	0.0414507	0.847501	-0.254431	0.230225	-0.208416	0.328416	-0.669631	0.000344882	0.365908	0.0786711
XLOC_013051	Bra005784	AT5G03850	M1	0.387527	0.0613438	0.367605	0.0771906	0.387281	0.0615223	-0.302078	0.15139	0.511349	0.0106529	-0.49717	0.0134463	-0.366394	0.0782451	0.348754	0.0948714	0.129706	0.545801	-0.00853762	0.968417	0.601956	0.00185745	-0.866249	4.48997e-08	-0.364462	0.0799495	0.280168	0.184837	0.174469	0.414858	-0.249969	0.238781	0.913149	4.86934e-10	-0.24884	0.24098	-0.489845	0.0151096	-0.611162	0.00151032	-0.73824	3.81658e-05	0.354193	0.0894872
XLOC_013060	Bra005805	AT5G04420	M1	-0.185115	0.386499	-0.0243634	0.91003	-0.108766	0.612926	-0.420125	0.0409532	0.19599	0.358704	0.232781	0.273677	0.0887328	0.680113	-0.273123	0.196595	0.275996	0.19174	-0.338464	0.105712	0.12289	0.567272	-0.02534	0.906439	-0.131636	0.539788	0.14063	0.512189	0.425862	0.0379966	0.177019	0.407963	0.225263	0.289906	0.239085	0.260522	-0.503851	0.0120633	-0.0369885	0.863759	-0.279532	0.185878	0.156736	0.464538
XLOC_013063	Bra005810	AT5G04520	M1	0.00780575	0.971124	0.161429	0.451099	0.0952257	0.658046	-0.0842806	0.695394	0.00820335	0.969653	0.142695	0.50595	-0.152231	0.477628	-0.19768	0.354489	0.167314	0.434543	-0.22815	0.283605	0.370248	0.0749263	-0.193552	0.364831	0.111754	0.603141	-0.0923619	0.667746	0.530577	0.00764629	0.176681	0.408874	0.282348	0.1813	-0.270806	0.20057	-0.193152	0.365842	0.485168	0.016257	-0.269215	0.203332	0.574275	0.00333853
XLOC_013092	Bra005862	AT5G05670	M1	-0.209741	0.325281	0.0108159	0.959995	-0.123674	0.564785	-0.123796	0.564397	-0.124814	0.561174	0.261813	0.216517	-0.125456	0.559145	-0.164986	0.441051	0.540589	0.00638489	-0.668256	0.000358372	0.451368	0.0268315	-0.447871	0.028184	-0.287734	0.172759	0.169319	0.428976	0.809271	1.68158e-06	-0.122887	0.567284	0.615084	0.00138024	-0.226337	0.287552	-0.344593	0.0991504	-0.0617841	0.77427	-0.719474	7.41764e-05	0.478388	0.0180455
XLOC_013094	Bra005864	AT5G05730	M1	0.169086	0.429621	0.16754	0.433913	0.141845	0.508512	-0.0670834	0.755461	0.159673	0.456104	-0.343162	0.100655	-0.224587	0.291395	0.405194	0.0495005	0.313271	0.136067	-0.165914	0.43845	0.435424	0.0334461	-0.826536	6.45217e-07	-0.572731	0.00344441	0.374837	0.0711145	0.183305	0.391242	-0.525177	0.00840869	0.863594	5.5024e-08	-0.43369	0.0342377	-0.137508	0.52169	-0.626313	0.00105947	-0.802802	2.34982e-06	0.342445	0.101414
XLOC_013151	Bra005963	AT5G08040	M1	0.338151	0.106055	0.402794	0.0509957	0.345942	0.0977478	-0.390207	0.059419	0.308299	0.14273	-0.417879	0.0421586	-0.362163	0.0820149	0.375384	0.070671	0.0346189	0.872415	0.00796889	0.97052	0.545332	0.00585105	-0.78362	5.92427e-06	-0.314791	0.134076	0.235848	0.267225	0.198311	0.352926	-0.334799	0.109785	0.771813	1.00117e-05	-0.660737	0.000440538	-0.386269	0.0622633	-0.201335	0.345481	-0.636813	0.000819688	0.593206	0.00224833
XLOC_013158	Bra005975	AT5G08180	M1	0.46989	0.0205105	0.543552	0.0060468	0.508079	0.0112502	-0.391657	0.0583974	0.467363	0.0212937	-0.450887	0.0270143	-0.583694	0.00275052	0.384145	0.0638403	0.0693456	0.747472	-0.0861807	0.688858	0.841359	2.5984e-07	-0.931955	3.63445e-11	-0.153477	0.47399	0.0384899	0.858283	0.415122	0.0436765	-0.352119	0.0915125	0.914814	3.96685e-10	-0.472462	0.0197373	-0.505464	0.0117476	-0.30721	0.14422	-0.738011	3.84894e-05	0.510301	0.0108415
XLOC_013169	Bra005991	AT5G08400	M1	0.159733	0.455934	0.0356436	0.86867	0.0996804	0.643063	-0.0937395	0.663073	0.414106	0.0442467	-0.312265	0.137397	-0.0380602	0.859849	0.20072	0.346986	0.264766	0.21119	-0.0521523	0.808766	0.304415	0.148094	-0.739968	3.58015e-05	-0.618535	0.00127382	0.634078	0.000877143	0.16218	0.448969	-0.0894272	0.67774	0.852729	1.2124e-07	-0.702714	0.000128671	-0.421788	0.0400783	-0.212568	0.318653	-0.789626	4.48025e-06	0.770151	1.07523e-05
XLOC_013184	Bra006013	NA	M1	0.20105	0.34618	0.0497494	0.817429	0.117427	0.584752	-0.0656628	0.76049	0.229273	0.281177	-0.418459	0.0418449	-0.0683693	0.750917	0.343643	0.100146	-0.0651492	0.762311	0.138522	0.518594	0.0902447	0.674951	-0.554563	0.00491865	-0.491724	0.0146677	0.548044	0.00556295	-0.200952	0.346419	-0.203821	0.339432	0.50593	0.0116576	-0.824653	7.19806e-07	-0.205425	0.335562	-0.225595	0.289178	-0.441523	0.030778	0.514939	0.0100275
XLOC_013205	Bra006053	AT5G10240	M1	0.163169	0.446169	0.129697	0.545828	0.142296	0.50715	-0.111195	0.604969	0.292776	0.165021	-0.331047	0.114074	-0.223238	0.29438	0.200488	0.347556	0.230598	0.278328	-0.236417	0.266038	0.433105	0.034508	-0.809442	1.66656e-06	-0.527346	0.00809522	0.514445	0.0101117	0.253699	0.231615	-0.153241	0.474677	0.866086	4.54696e-08	-0.507526	0.011354	-0.514273	0.0101412	-0.551733	0.0051902	-0.812559	1.41176e-06	0.472781	0.019643
XLOC_013206	Bra006056	AT5G10360	M1	0.112736	0.599942	0.10606	0.621841	0.123989	0.563787	-0.127748	0.551929	0.292086	0.166065	-0.186157	0.383785	-0.154562	0.470833	0.067767	0.753044	0.31063	0.139578	-0.216374	0.309859	0.373492	0.0722164	-0.53045	0.00766359	-0.319721	0.127762	0.225702	0.288943	0.243391	0.251773	-0.0997779	0.642736	0.645541	0.000657504	0.269525	0.202793	-0.438182	0.0322177	-0.736613	4.05166e-05	-0.593565	0.00223101	-0.0314062	0.884174
XLOC_013224	Bra006084	AT5G10980	M1	0.0167787	0.937975	-0.254734	0.229651	-0.0926806	0.666664	-0.0552869	0.797498	0.335466	0.109035	-0.153309	0.47448	0.36029	0.0837274	-0.156791	0.464378	0.432364	0.0348525	0.122175	0.569546	-0.0960593	0.655232	-0.416596	0.0428598	-0.738385	3.79627e-05	0.671631	0.00032605	-0.0504218	0.815003	-0.0319365	0.882231	0.589769	0.00241993	-0.264698	0.211312	-0.319975	0.127442	-0.350738	0.0928799	-0.653138	0.000539673	0.444028	0.0297325
XLOC_013226	Bra006091	NA	M1	0.446298	0.0288098	0.442252	0.0304707	0.450627	0.0271134	-0.311886	0.137901	0.476921	0.0184529	-0.523207	0.00870196	-0.543271	0.00607816	0.431631	0.0351964	0.0491529	0.819583	-0.0752915	0.726596	0.725112	6.1092e-05	-0.931546	3.87453e-11	-0.258053	0.223429	0.13011	0.544538	0.244118	0.250316	-0.409566	0.0468655	0.886696	7.99172e-09	-0.347062	0.0965946	-0.455574	0.0252744	-0.639649	0.000763583	-0.723535	6.45292e-05	0.266315	0.208432
XLOC_013233	Bra006099	AT5G11480	M1	0.0710502	0.741468	0.10292	0.63225	0.0743973	0.729724	-0.158919	0.45826	0.228544	0.28275	-0.129805	0.54549	-0.140083	0.513847	0.0874702	0.684434	0.447815	0.0282059	-0.306755	0.144846	0.492962	0.0143824	-0.786572	5.17005e-06	-0.547216	0.00564962	0.439008	0.0318569	0.515483	0.00993544	-0.231972	0.275395	0.921393	1.69059e-10	-0.610263	0.00154156	-0.408135	0.0477156	-0.19763	0.354614	-0.918387	2.51821e-10	0.748581	2.58349e-05
XLOC_013277	Bra006164	AT5G12470	M1	0.0949969	0.658819	0.0248029	0.908414	0.0534537	0.804083	-0.0910451	0.672224	0.216676	0.309167	-0.230634	0.278251	-0.059867	0.781105	0.128603	0.549248	0.121732	0.570959	-0.0977179	0.649647	0.216418	0.309757	-0.588937	0.00246309	-0.486674	0.0158799	0.569595	0.0036681	0.152377	0.477204	-0.0317185	0.88303	0.627468	0.00103044	-0.866878	4.27605e-08	-0.39863	0.0536725	-0.0197757	0.926922	-0.609567	0.00156614	0.760933	1.58119e-05
XLOC_013295	Bra006198,Bra006199	NA	M1	0.484225	0.0164967	0.441347	0.0308526	0.441247	0.0308946	-0.548021	0.00556534	0.431104	0.0354452	-0.578832	0.00304202	-0.467704	0.0211866	0.639875	0.000759258	-0.069603	0.746564	0.19984	0.34915	0.564529	0.00405552	-0.792579	3.89251e-06	-0.252315	0.234256	0.0220238	0.91864	-0.0326446	0.879638	-0.702959	0.000127675	0.708558	0.000106639	-0.381896	0.0655428	-0.0642959	0.765338	-0.499225	0.0130078	-0.513238	0.0103199	0.202441	0.34278
XLOC_013296	Bra006200	AT5G13450	M1	0.33565	0.108829	0.275265	0.192968	0.326112	0.119899	-0.312664	0.136868	0.543799	0.00601929	-0.25401	0.231023	-0.135137	0.528962	0.150119	0.48383	0.00232284	0.991405	0.241118	0.256367	0.363246	0.0810373	-0.372806	0.0727832	-0.0495911	0.818	0.110722	0.606514	0.109065	0.611942	0.146606	0.494235	0.475394	0.0188848	-0.256041	0.227186	-0.334568	0.110045	0.280925	0.183604	-0.294055	0.163098	0.614963	0.0013841
XLOC_013303	Bra006215	AT5G13800	M1	-0.1885	0.37772	-0.205109	0.336322	-0.200786	0.346825	0.252032	0.2348	-0.0865192	0.687696	-0.0261452	0.903479	0.232701	0.273846	0.199367	0.350315	0.289237	0.170426	-0.07632	0.723003	-0.14109	0.510796	-0.220153	0.301275	-0.553482	0.00502096	0.440505	0.0312111	-0.0735534	0.732679	-0.231929	0.275485	0.332588	0.112298	-0.276743	0.190491	0.248838	0.240984	-0.21104	0.322225	-0.351684	0.0919418	0.291508	0.166944
XLOC_013310	Bra006225	AT5G13950	M1	0.143695	0.502942	0.222497	0.296028	0.171236	0.423692	-0.181156	0.396916	0.117529	0.584421	-0.150051	0.484032	-0.334809	0.109774	0.185084	0.38658	0.133644	0.533566	-0.222175	0.296744	0.475371	0.0188916	-0.599917	0.00194293	-0.207906	0.329627	0.0474314	0.825805	0.39878	0.0535742	-0.439734	0.0315425	0.540727	0.00636877	-0.63999	0.000757061	-0.127264	0.55345	-0.0820248	0.703182	-0.543167	0.00608988	0.427458	0.0372048
XLOC_013314	Bra006234	AT5G14040	M1	0.562566	0.00421459	0.569041	0.0037089	0.56179	0.00427887	-0.330014	0.115275	0.441823	0.030651	-0.62056	0.00121472	-0.60964	0.00156356	0.608608	0.00160057	-0.0635225	0.768085	0.0932938	0.664584	0.752523	2.21563e-05	-0.939299	1.07119e-11	-0.184538	0.388009	0.0258666	0.904503	0.123108	0.56658	-0.54906	0.00545808	0.840729	2.70587e-07	-0.465656	0.0218365	-0.268456	0.204659	-0.50354	0.012125	-0.624216	0.00111396	0.30996	0.140479
XLOC_013329	Bra006260	AT5G14520	M1	0.378742	0.0679898	0.437204	0.0326493	0.40322	0.0507276	-0.355501	0.0882275	0.423997	0.0389385	-0.402287	0.051316	-0.46071	0.0234724	0.326879	0.11898	0.154081	0.47223	-0.116824	0.586693	0.745671	2.88874e-05	-0.925018	1.02316e-10	-0.293536	0.163877	0.193861	0.36405	0.415011	0.0437385	-0.314854	0.133993	0.95017	1.28607e-12	-0.583066	0.0027868	-0.489965	0.015081	-0.265295	0.210245	-0.807833	1.81341e-06	0.638049	0.000794812
XLOC_013346	Bra006289	AT5G15200	M1	0.393502	0.0571166	0.369294	0.0757378	0.388894	0.0603557	-0.340867	0.103102	0.515811	0.00988028	-0.469371	0.0206693	-0.391558	0.0584669	0.322075	0.124823	0.14596	0.496161	-0.054394	0.800704	0.66528	0.000389146	-0.934078	2.59049e-11	-0.385082	0.0631406	0.328163	0.117452	0.29021	0.168928	-0.2345	0.270048	0.979168	1.00351e-16	-0.507512	0.0113566	-0.566694	0.00388593	-0.421169	0.0404022	-0.824392	7.30773e-07	0.587657	0.00253084
XLOC_013347	Bra006290	AT5G15220	M1	-0.372292	0.0732095	-0.317501	0.130578	-0.364097	0.0802749	0.0479973	0.823759	-0.0371693	0.8631	0.33547	0.109031	0.401899	0.0515623	-0.393725	0.0569637	0.694196	0.000167886	-0.428068	0.0369059	-0.0216316	0.920085	-0.239594	0.259477	-0.629769	0.000974648	0.600447	0.00192039	0.518336	0.00946407	0.152665	0.476359	0.541744	0.00625126	-0.324477	0.121876	-0.31195	0.137816	0.12667	0.555317	-0.708188	0.000107929	0.72799	5.52309e-05
XLOC_013365	Bra006338	AT5G16070	M1	0.196364	0.357767	0.213218	0.317139	0.215814	0.311143	-0.381567	0.0657953	0.473493	0.019434	-0.260261	0.219352	-0.151934	0.478499	0.0251365	0.907187	0.210488	0.323521	-0.0883546	0.681406	0.414727	0.0438976	-0.58711	0.00256021	-0.322712	0.124037	0.306123	0.145718	0.255577	0.228061	0.014115	0.947807	0.72077	7.0969e-05	-0.0378123	0.860753	-0.616036	0.00135015	-0.446827	0.0285981	-0.626431	0.00105648	0.324205	0.122207
XLOC_013373	Bra006351,Bra006352	NA	M1	0.506431	0.0115616	0.507305	0.0113956	0.53577	0.00696842	-0.299871	0.154549	0.559361	0.00448557	-0.459877	0.0237574	-0.5508	0.00528238	0.240783	0.257048	-0.257843	0.223819	0.0461893	0.830302	0.670437	0.000337183	-0.681025	0.000249044	0.0859458	0.689665	0.0910778	0.672112	0.244274	0.250004	0.151074	0.481024	0.614863	0.00138732	-0.619346	0.00124986	-0.702926	0.000127807	0.0511352	0.81243	-0.408642	0.0474134	0.612331	0.0014705
XLOC_013399	Bra006395	AT5G17310	M1	0.289389	0.170191	0.197496	0.354948	0.234862	0.269288	-0.467806	0.0211548	0.59673	0.00208322	-0.358093	0.0857701	-0.112967	0.599189	0.352304	0.0913303	0.124626	0.561767	0.13603	0.526218	0.348581	0.095046	-0.565327	0.00399228	-0.380475	0.066637	0.328572	0.116969	0.0353671	0.86968	-0.2223	0.296467	0.677	0.000279846	-0.197603	0.354682	-0.406091	0.048951	-0.300585	0.153522	-0.532476	0.00739231	0.39041	0.059275
XLOC_013414	Bra006420,Bra006421	NA	M1	-0.214739	0.313618	-0.351867	0.0917603	-0.283288	0.179788	0.149245	0.486409	0.119877	0.576883	-0.0072244	0.973273	0.370504	0.0747097	-0.123268	0.566071	0.466418	0.0215929	-0.205397	0.335629	-0.127035	0.55417	-0.37602	0.0701572	-0.777669	7.74821e-06	0.873734	2.47125e-08	0.0894419	0.67769	0.192215	0.368215	0.609276	0.00157651	-0.375509	0.0705695	-0.389423	0.0599769	-0.306607	0.145049	-0.6776	0.000275056	0.574093	0.00335084
XLOC_013425	Bra006443	AT5G18180	M1	0.413786	0.0444274	0.421811	0.040066	0.420847	0.0405716	-0.317488	0.130595	0.445293	0.0292153	-0.4813	0.0172587	-0.459625	0.023844	0.369949	0.0751793	0.127101	0.553962	-0.0586261	0.785538	0.708514	0.000106793	-0.966289	1.88362e-14	-0.351161	0.0924591	0.227116	0.285852	0.307236	0.144184	-0.386631	0.0619977	0.961335	8.31872e-14	-0.574345	0.0033338	-0.454762	0.0255691	-0.426205	0.0378254	-0.816444	1.14314e-06	0.543961	0.00600129
XLOC_013428	Bra006446,Bra006447	NA	M1	0.513254	0.0103172	0.394165	0.0566621	0.457658	0.0245302	-0.436329	0.033039	0.637766	0.000800463	-0.648998	0.000601388	-0.348837	0.0947876	0.557668	0.00463458	-0.235152	0.26868	0.314465	0.134501	0.386642	0.0619893	-0.669196	0.000349108	-0.261439	0.217198	0.205164	0.336189	-0.223034	0.294832	-0.39032	0.0593387	0.581099	0.00290297	-0.420978	0.0405025	-0.353324	0.0903316	-0.474631	0.0191038	-0.380872	0.0663296	0.212353	0.319154
XLOC_013433	Bra006456	AT5G18400	M1	0.450984	0.0269772	0.371065	0.074236	0.41627	0.0430393	-0.483054	0.0167985	0.579223	0.00301762	-0.468167	0.021042	-0.348149	0.095485	0.326578	0.11934	-0.0288237	0.893643	0.16934	0.428918	0.536482	0.00687951	-0.728754	5.37607e-05	-0.226836	0.286462	0.133785	0.533132	0.115473	0.591059	-0.305413	0.146703	0.709638	0.000102952	-0.555193	0.0048599	-0.351429	0.092194	-0.113737	0.596686	-0.558531	0.00455811	0.55132	0.00523088
XLOC_013444	Bra006481	AT5G18800	M1	0.0839386	0.696573	0.0263485	0.902732	0.0698543	0.745679	-0.139652	0.515156	0.3707	0.074544	-0.138607	0.518335	-0.0182021	0.932724	0.0278594	0.897183	0.37195	0.0734947	-0.104173	0.62809	0.267854	0.205716	-0.443196	0.0300766	-0.364141	0.0802356	0.219796	0.302081	0.19148	0.370085	-0.142947	0.505191	0.59465	0.00217937	0.278902	0.186913	-0.299545	0.15502	-0.600284	0.00192733	-0.558389	0.00457065	0.02116	0.921822
XLOC_013449	Bra006491	AT5G19030	M1	-0.234488	0.270074	-0.23155	0.276294	-0.225142	0.290173	0.0192912	0.928708	0.034282	0.873647	0.19956	0.349838	0.215698	0.311408	-0.226091	0.288091	0.619988	0.00123118	-0.391909	0.0582212	0.140294	0.513206	-0.34089	0.103078	-0.527846	0.00802435	0.469466	0.02064	0.471141	0.0201312	0.0773804	0.719305	0.609669	0.00156252	-0.0675636	0.753763	-0.280374	0.184501	-0.146185	0.495491	-0.693238	0.000172892	0.495594	0.0137909
XLOC_013457	Bra006507	AT5G19510	M1	-0.28276	0.180636	-0.283425	0.179569	-0.27102	0.200202	0.217325	0.307685	0.00304421	0.988736	0.246613	0.245354	0.256145	0.226992	-0.326608	0.119304	0.663515	0.000408462	-0.467291	0.0213163	0.103678	0.62973	-0.312635	0.136907	-0.53272	0.00736018	0.52794	0.0080111	0.508372	0.0111957	0.221535	0.298174	0.584751	0.00269039	-0.034889	0.871428	-0.386226	0.0622951	-0.183603	0.39046	-0.706347	0.000114552	0.46081	0.0234382
XLOC_013461	Bra006516	AT5G19760	M1	0.436559	0.0329364	0.447963	0.0281474	0.441998	0.0305774	-0.308433	0.142547	0.37285	0.0727461	-0.468996	0.0207847	-0.517293	0.00963411	0.389597	0.0598527	0.0654679	0.761181	-0.0431681	0.841259	0.718267	7.7276e-05	-0.923988	1.18311e-10	-0.254621	0.229864	0.108548	0.613641	0.304943	0.147357	-0.476824	0.0184802	0.858471	8.05088e-08	-0.622669	0.00115568	-0.362483	0.0817257	-0.363536	0.0807773	-0.729438	5.24724e-05	0.475631	0.0188173
XLOC_013478	Bra006553	AT5G20290	M1	0.154725	0.470358	0.0816747	0.704393	0.124019	0.563692	-0.146023	0.495973	0.392955	0.0574941	-0.29356	0.163841	-0.0847809	0.693671	0.130374	0.543715	0.307763	0.143461	-0.142039	0.507928	0.386469	0.0621165	-0.786005	5.30795e-06	-0.60134	0.00188293	0.629362	0.000984339	0.262309	0.215617	-0.0256643	0.905247	0.924088	1.16664e-10	-0.589669	0.00242508	-0.562211	0.00424391	-0.316289	0.132135	-0.860301	7.03929e-08	0.737396	3.93708e-05
XLOC_013485	Bra006567	NA	M1	0.112419	0.600973	0.0574432	0.789769	0.0772451	0.719776	-0.184693	0.387602	0.322037	0.12487	-0.245584	0.247393	-0.0789269	0.713923	0.105697	0.623041	0.435015	0.0336316	-0.211135	0.322002	0.402386	0.0512531	-0.831189	4.89545e-07	-0.680462	0.000253168	0.557076	0.00468764	0.343485	0.100314	-0.270304	0.20144	0.954444	4.89218e-13	-0.544142	0.00598126	-0.461644	0.0231562	-0.45975	0.023801	-0.953845	5.63284e-13	0.615973	0.00135214
XLOC_013499	Bra006584,Bra006585	NA	M1	0.323556	0.123	0.406224	0.0488695	0.368542	0.0763821	-0.380239	0.0668197	0.444405	0.0295774	-0.37121	0.0741148	-0.450158	0.0272935	0.262421	0.215414	0.138089	0.519916	-0.192506	0.367478	0.718576	7.64723e-05	-0.877798	1.75848e-08	-0.279822	0.185404	0.231596	0.276196	0.429168	0.036371	-0.202981	0.341468	0.927647	6.99578e-11	-0.452076	0.0265641	-0.607968	0.00162388	-0.367264	0.0774861	-0.786229	5.25303e-06	0.558263	0.00458175
XLOC_013501	Bra006590	AT5G20990	M1	0.551969	0.00516704	0.406361	0.0487862	0.493967	0.014154	-0.187033	0.381511	0.57652	0.0031895	-0.685367	0.000219164	-0.446511	0.0287241	0.630788	0.00095078	-0.132364	0.537527	0.247108	0.244377	0.524637	0.00848825	-0.807641	1.83164e-06	-0.24893	0.240805	0.203697	0.339732	-0.160384	0.454074	-0.374829	0.0711211	0.727312	5.65648e-05	-0.296033	0.160154	-0.313007	0.136416	-0.664087	0.000402108	-0.488421	0.0154516	0.139612	0.515276
XLOC_013505	Bra006595	AT5G21274	M1	0.408161	0.0477002	0.336714	0.107642	0.385842	0.0625779	-0.170805	0.424877	0.38107	0.0661776	-0.441816	0.0306541	-0.296475	0.159502	0.409954	0.046637	-0.322854	0.123862	0.314959	0.133857	0.32065	0.126597	-0.406403	0.0487609	0.0317787	0.882809	0.165008	0.440992	-0.141635	0.509147	0.122392	0.568857	0.365305	0.0792023	-0.598483	0.00200504	-0.206711	0.332479	0.248264	0.242106	-0.117821	0.583481	0.594032	0.00220865
XLOC_013522	Bra006621	AT5G22330	M1	0.146056	0.495874	0.0571307	0.790888	0.101803	0.63597	-0.134715	0.530264	0.31337	0.135937	-0.271878	0.198725	0.0102856	0.961955	0.132931	0.535771	0.376134	0.0700651	-0.0292674	0.892015	0.309199	0.141507	-0.754492	2.04976e-05	-0.669409	0.000347035	0.584044	0.0027305	0.207558	0.330457	-0.210228	0.324134	0.888184	6.96002e-09	-0.659405	0.000456668	-0.335344	0.109172	-0.221509	0.298233	-0.851913	1.28322e-07	0.780118	6.94474e-06
XLOC_013525	Bra006626	AT5G22450	M1	0.324358	0.122021	0.301092	0.152795	0.316643	0.131678	-0.28157	0.182556	0.464358	0.0222567	-0.409308	0.0470182	-0.325859	0.120204	0.24001	0.258625	0.153757	0.473176	-0.100622	0.639913	0.594495	0.00218671	-0.884525	9.74495e-09	-0.409707	0.0467828	0.416613	0.0428504	0.310793	0.139359	-0.112169	0.601788	0.943839	4.65295e-12	-0.621768	0.00118062	-0.614214	0.00140822	-0.302162	0.15127	-0.818579	1.01586e-06	0.696092	0.000158353
XLOC_013531	Bra006633	AT5G22740	M1	0.568923	0.00371767	0.365712	0.0788438	0.475769	0.018778	-0.339225	0.10488	0.642014	0.000719356	-0.716731	8.13858e-05	-0.247657	0.243296	0.573518	0.0033901	-0.455877	0.0251651	0.59421	0.00220018	0.173854	0.41653	-0.452594	0.0263697	-0.135951	0.52646	0.22741	0.285212	-0.531741	0.00748976	-0.134186	0.531894	0.336011	0.108425	-0.453198	0.0261446	-0.275528	0.192525	-0.231381	0.276655	-0.0806844	0.707823	0.236945	0.264941
XLOC_013546	Bra006661	AT5G60390	M1	0.167266	0.434674	0.0899593	0.675924	0.142915	0.505286	-0.181425	0.396202	0.449901	0.0273923	-0.312306	0.137343	-0.097516	0.650326	0.118913	0.579973	0.269327	0.203137	-0.134901	0.529689	0.367092	0.0776353	-0.722669	6.64878e-05	-0.541579	0.00627019	0.580021	0.0029684	0.202984	0.341462	0.0244492	0.909715	0.863764	5.43159e-08	-0.310178	0.140186	-0.623689	0.00112804	-0.505726	0.011697	-0.782581	6.21236e-06	0.504551	0.0119254
XLOC_013549	Bra006664	NA	M1	0.173239	0.418206	0.191741	0.369421	0.185187	0.386312	-0.103689	0.629694	0.343215	0.100599	-0.272279	0.198037	-0.288583	0.171439	0.220244	0.30107	0.269438	0.202943	-0.294134	0.162979	0.544771	0.00591213	-0.798292	2.94611e-06	-0.430522	0.0357215	0.384462	0.0636028	0.382958	0.064735	-0.198021	0.353643	0.867504	4.0725e-08	-0.383699	0.0641751	-0.556546	0.00473558	-0.527167	0.00812063	-0.804779	2.12416e-06	0.417639	0.0422892
XLOC_013566	Bra006698	AT5G59710	M1	0.418621	0.0417576	0.536363	0.00689424	0.46536	0.0219315	-0.357932	0.0859204	0.324052	0.122393	-0.445804	0.0290086	-0.624241	0.0011133	0.472232	0.0198053	0.0502979	0.81545	-0.150528	0.482628	0.794907	3.47838e-06	-0.892151	4.76785e-09	-0.150047	0.484043	-0.0520043	0.809299	0.352208	0.0914247	-0.563427	0.00414418	0.820534	9.10477e-07	-0.338737	0.105413	-0.31951	0.128027	-0.549584	0.00540468	-0.668761	0.000353363	0.216781	0.308927
XLOC_013589	Bra006734	AT5G58990	M1	0.452896	0.026257	0.377953	0.0686125	0.419328	0.0413776	-0.536326	0.00689881	0.552781	0.00508824	-0.509194	0.0110435	-0.357484	0.0863421	0.318196	0.129691	0.0561733	0.794319	0.14666	0.494076	0.574752	0.00330636	-0.824148	7.41105e-07	-0.315645	0.132967	0.17677	0.408634	0.135673	0.527316	-0.377048	0.0693326	0.821239	8.74978e-07	-0.438126	0.0322422	-0.411131	0.0459495	-0.367304	0.0774514	-0.667961	0.000361323	0.45417	0.0257858
XLOC_013596	Bra006748	AT5G58710	M1	0.325537	0.120592	0.343592	0.100201	0.319935	0.127492	-0.455561	0.025279	0.519468	0.00928212	-0.371775	0.0736409	-0.221183	0.298963	0.494004	0.0141458	-0.138869	0.517537	0.238292	0.262153	0.319497	0.128044	-0.356996	0.0868035	-0.0826875	0.700891	0.0757708	0.724921	-0.0948702	0.659247	-0.146183	0.495495	0.411622	0.0456652	-0.104767	0.626118	-0.179584	0.401093	-0.0638607	0.766884	-0.184154	0.389015	0.287552	0.173044
XLOC_013607	Bra006768	AT5G58410	M1	0.438872	0.0319161	0.473951	0.0193004	0.470068	0.020456	-0.467376	0.0212897	0.598842	0.00198932	-0.463185	0.0226418	-0.491559	0.0147061	0.306751	0.14485	0.036761	0.86459	-0.0561973	0.794233	0.748367	2.60495e-05	-0.86285	5.82041e-08	-0.188389	0.378006	0.172796	0.419416	0.338301	0.10589	-0.140841	0.51155	0.903854	1.42546e-09	-0.344932	0.0987959	-0.664344	0.00039929	-0.366803	0.0778873	-0.703931	0.000123783	0.504025	0.0120289
XLOC_013614	Bra006778	AT5G58250	M1	0.483671	0.0166389	0.399382	0.0531807	0.489638	0.0151589	-0.147213	0.492431	0.577699	0.00311356	-0.444507	0.0295356	-0.405108	0.049554	0.141073	0.510845	-0.37293	0.0726799	0.203881	0.339285	0.448355	0.0279932	-0.441449	0.0308091	0.180959	0.397436	0.123574	0.5651	0.0278094	0.897366	0.446973	0.0285398	0.383885	0.0640352	-0.465299	0.0219514	-0.671427	0.000327927	0.161979	0.449539	-0.16045	0.453887	0.52339	0.0086744
XLOC_013640	Bra006828	AT5G57280	M1	0.374038	0.0717673	0.483436	0.0166995	0.425849	0.0380033	-0.344733	0.0990035	0.347328	0.0963222	-0.384649	0.063463	-0.531696	0.00749576	0.318262	0.129607	0.120645	0.574428	-0.170709	0.425142	0.789873	4.42825e-06	-0.887667	7.3041e-09	-0.182583	0.393144	0.0913857	0.671064	0.439293	0.0317332	-0.27412	0.194901	0.90436	1.34835e-09	-0.409994	0.0466137	-0.493091	0.0143528	-0.33578	0.108683	-0.744415	3.02997e-05	0.503804	0.0120726
XLOC_013648	Bra006839	AT5G57015	M1	0.406752	0.0485491	0.291351	0.167183	0.364169	0.0802111	-0.431661	0.0351822	0.53643	0.00688593	-0.448085	0.0280995	-0.252324	0.23424	0.157693	0.46178	0.145611	0.497203	0.137023	0.523173	0.51349	0.0102762	-0.818921	9.96677e-07	-0.392972	0.0574825	0.260544	0.218834	0.186474	0.38296	-0.313905	0.135234	0.836957	3.43603e-07	-0.531363	0.00754033	-0.467837	0.0211449	-0.31283	0.136649	-0.736098	4.1287e-05	0.555611	0.00482121
XLOC_013655	Bra006853	AT5G56840	M1	-0.257179	0.225057	-0.259112	0.221468	-0.276128	0.191519	-0.068441	0.750663	0.00822416	0.969576	0.224897	0.290712	0.237646	0.263487	-0.258409	0.222768	0.760182	1.63048e-05	-0.437636	0.0324579	0.146076	0.495817	-0.448098	0.0280945	-0.688837	0.000197583	0.453775	0.0259311	0.558561	0.00455548	-0.255596	0.228024	0.670229	0.000339153	-0.237816	0.263136	-0.21722	0.307925	-0.236107	0.266684	-0.861342	6.51635e-08	0.472579	0.0197027
XLOC_013669	Bra028924	NA	M1	0.569643	0.00366459	0.585949	0.00262359	0.571826	0.00350775	-0.477908	0.0181782	0.605045	0.00173409	-0.648901	0.000602906	-0.591169	0.00234872	0.6359	0.000838505	-0.179312	0.401817	0.144719	0.499872	0.729511	5.23379e-05	-0.898268	2.58303e-09	-0.159108	0.457719	0.114267	0.594966	0.0927636	0.666382	-0.364651	0.0797822	0.838121	3.19397e-07	-0.571968	0.00349772	-0.41536	0.0435438	-0.321254	0.125842	-0.566366	0.00391123	0.497616	0.0133501
XLOC_013693	Bra028970	AT5G55580	M1	0.218194	0.305707	0.283719	0.179098	0.246229	0.246114	-0.365883	0.0786929	0.376358	0.0698846	-0.242632	0.253301	-0.377154	0.069248	0.122493	0.568535	0.299537	0.155031	-0.322521	0.124273	0.679249	0.000262253	-0.835964	3.6554e-07	-0.332833	0.112017	0.224098	0.292476	0.543134	0.00609354	-0.244744	0.249065	0.910548	6.65336e-10	-0.310753	0.139413	-0.598686	0.00199616	-0.467842	0.0211434	-0.850706	1.3948e-07	0.429779	0.036077
XLOC_013712	Bra029000	AT5G54970	M1	-0.154067	0.472273	-0.315915	0.132618	-0.219277	0.303253	-0.007478	0.972336	0.251692	0.235453	0.0274979	0.89851	0.338371	0.105814	-0.149191	0.486569	0.567371	0.00383419	-0.173776	0.416743	-0.00147891	0.994528	-0.430491	0.0357365	-0.756182	1.91631e-05	0.71822	7.73982e-05	0.230009	0.279592	0.0295213	0.891084	0.680708	0.000251355	-0.354349	0.0893361	-0.291079	0.167598	-0.166895	0.435709	-0.760232	1.6271e-05	0.657953	0.000474846
XLOC_013722	Bra029020	AT5G54580	M1	0.0725605	0.736162	0.138009	0.520161	0.0890279	0.679104	-0.246271	0.24603	0.189121	0.376121	-0.144485	0.500572	-0.151931	0.478508	0.14352	0.503466	0.467843	0.021143	-0.294249	0.162808	0.507189	0.0114175	-0.777974	7.64379e-06	-0.54608	0.00577028	0.372717	0.0728569	0.477677	0.0182421	-0.3628	0.081439	0.919962	2.04767e-10	-0.432907	0.0345997	-0.345391	0.0983192	-0.338922	0.10521	-0.903741	1.44309e-09	0.598296	0.00201325
XLOC_013724	Bra029025	AT5G54500	M1	0.534018	0.00719131	0.593923	0.00221387	0.560144	0.00441803	-0.472888	0.0196115	0.449579	0.0275165	-0.50749	0.0113607	-0.653616	0.000532911	0.418466	0.0418412	0.000158922	0.999412	-0.0212165	0.921614	0.851417	1.32804e-07	-0.92388	1.20109e-10	-0.0834753	0.698171	-0.104875	0.625761	0.346426	0.0972474	-0.508743	0.0111267	0.840932	2.6708e-07	-0.391002	0.0588568	-0.395512	0.0557468	-0.421745	0.0401005	-0.666384	0.000377471	0.312663	0.136871
XLOC_013742	Bra029058	AT5G53650	M1	0.3207	0.126533	0.346597	0.0970714	0.328785	0.116717	-0.484083	0.0165329	0.464079	0.0223477	-0.232922	0.273377	-0.297301	0.158286	0.121837	0.570623	-0.0225025	0.916878	0.070843	0.742197	0.401996	0.0515006	-0.248952	0.240761	0.150645	0.482283	-0.256761	0.225838	0.1105	0.60724	-0.102945	0.632167	0.267254	0.206771	0.53948	0.00651545	-0.403606	0.0504859	-0.440061	0.0314015	-0.143426	0.503749	-0.310138	0.140239
XLOC_013749	Bra029069	AT5G53420	M1	0.350149	0.0934677	0.405449	0.0493441	0.374366	0.0714994	-0.358339	0.0855391	0.395731	0.0555995	-0.382323	0.0652171	-0.389717	0.0597675	0.328426	0.117141	0.238051	0.262652	-0.107346	0.617597	0.697651	0.000150876	-0.90624	1.0936e-09	-0.370746	0.0745051	0.201473	0.345144	0.375115	0.0708892	-0.424049	0.0389124	0.95512	4.16364e-13	-0.430916	0.0355342	-0.44503	0.0293222	-0.407834	0.0478963	-0.8349	3.90434e-07	0.518167	0.00949149
XLOC_013751	Bra029071	AT5G53400	M1	0.491122	0.014808	0.480739	0.0174082	0.504659	0.0119044	-0.3311	0.114012	0.519893	0.00921464	-0.53571	0.00697598	-0.459988	0.0237191	0.413281	0.0447142	0.0445615	0.836202	0.0805945	0.708134	0.711079	9.82051e-05	-0.921607	1.64222e-10	-0.267796	0.205816	0.192294	0.368016	0.216317	0.309988	-0.29016	0.169006	0.931927	3.65027e-11	-0.512242	0.0104944	-0.456028	0.0251106	-0.31979	0.127674	-0.721166	7.00134e-05	0.592654	0.00227516
XLOC_013752	Bra029073	AT5G53350	M1	-0.239188	0.26031	-0.294037	0.163126	-0.293753	0.16355	0.295999	0.160204	-0.153169	0.474889	0.0719755	0.738216	0.254433	0.230221	-0.0263946	0.902563	0.667141	0.000369646	-0.358294	0.085581	0.0327268	0.879338	-0.510149	0.0108689	-0.797721	3.03047e-06	0.657867	0.000475946	0.289929	0.169361	-0.223309	0.294222	0.694136	0.000168197	-0.416497	0.0429147	-0.0468587	0.827878	-0.362102	0.0820702	-0.825861	6.71122e-07	0.495265	0.0138637
XLOC_013796	Bra029166	AT5G51570	M1	0.333062	0.111756	0.46006	0.0236945	0.388221	0.0608402	-0.450221	0.0272692	0.269558	0.202735	-0.252107	0.234656	-0.47965	0.0177011	0.177312	0.407176	0.203431	0.340375	-0.157233	0.463106	0.760488	1.6102e-05	-0.79103	4.19163e-06	-0.13347	0.534103	-0.0942071	0.66149	0.538681	0.00661083	-0.464733	0.0221344	0.78634	5.22602e-06	-0.40325	0.0507087	-0.331824	0.113175	-0.184306	0.388617	-0.706687	0.000113302	0.455018	0.0254758
XLOC_013797	Bra029167	NA	M1	-0.00553626	0.979517	-0.00451441	0.983297	-0.0048989	0.981875	-0.144013	0.501987	0.269836	0.202252	-0.0726287	0.735922	-0.0257777	0.90483	-0.0909787	0.67245	0.469122	0.020746	-0.353764	0.0899027	0.387512	0.0613542	-0.705096	0.000119255	-0.585864	0.0026283	0.589666	0.00242526	0.508121	0.0112424	0.043828	0.838863	0.894238	3.88422e-09	-0.523295	0.00868869	-0.60908	0.00158353	-0.209604	0.325604	-0.916368	3.26378e-10	0.768896	1.13436e-05
XLOC_013798	Bra029168	AT5G51545	M1	-0.0783689	0.715863	-0.143118	0.504677	-0.141299	0.510164	-0.0344874	0.872896	0.0835457	0.697928	0.0146514	0.945826	0.175837	0.411151	-0.00601047	0.977763	0.431252	0.0353752	-0.150318	0.483244	0.106335	0.620932	-0.450435	0.0271872	-0.589853	0.00241564	0.540142	0.00643721	0.28901	0.170778	-0.125381	0.559382	0.596351	0.00210047	-0.716436	8.21965e-05	-0.17385	0.41654	0.150672	0.482202	-0.667936	0.000361573	0.798637	2.89615e-06
XLOC_013828	Bra022769	AT2G30000	M1	0.138306	0.519254	0.0427329	0.84284	0.134684	0.530359	0.0260784	0.903725	0.24749	0.243626	-0.11616	0.588838	0.0129362	0.952161	-0.133763	0.5332	0.286677	0.174412	0.000996666	0.996312	0.274123	0.194896	-0.444193	0.0296647	-0.279794	0.185449	0.322316	0.124525	0.234915	0.269176	0.190901	0.371562	0.589756	0.00242063	-0.221244	0.298826	-0.376565	0.0697189	-0.0201243	0.925638	-0.540295	0.00641921	0.567612	0.00381585
XLOC_013831	Bra022779	AT2G30110	M1	0.385979	0.0624765	0.493707	0.0142128	0.413012	0.0448671	-0.295638	0.160739	0.202171	0.343439	-0.475541	0.018843	-0.521643	0.00894084	0.55445	0.0049293	-0.00824891	0.969485	-0.0112025	0.958567	0.603317	0.00180221	-0.75346	2.13526e-05	-0.17351	0.417467	-0.0789274	0.713921	0.10633	0.620949	-0.69836	0.000147581	0.643974	0.000684391	-0.253777	0.231466	-0.064193	0.765704	-0.621557	0.00118649	-0.500179	0.0128082	0.0183185	0.932295
XLOC_013835	Bra022787	AT2G30270	M1	0.406266	0.0488439	0.480892	0.0173673	0.435792	0.0332801	-0.172316	0.420729	0.19466	0.362038	-0.361205	0.0828879	-0.470853	0.0202182	0.455798	0.0251935	0.0515987	0.81076	0.0929672	0.665691	0.597742	0.00203776	-0.605298	0.00172432	-0.00665852	0.975366	-0.302164	0.151267	0.157498	0.462341	-0.659419	0.000456497	0.510067	0.0108839	-0.0998861	0.642374	0.124607	0.56183	-0.350125	0.0934915	-0.371347	0.0739992	0.00275128	0.98982
XLOC_013836	Bra022789	AT2G30320	M1	0.0322651	0.881028	0.0132918	0.950847	0.0512564	0.811993	0.0647375	0.763771	0.146186	0.495488	-0.123427	0.565569	-0.0638716	0.766845	-0.15083	0.481738	0.0823527	0.702048	-0.169826	0.427574	0.164175	0.443332	-0.329969	0.115328	-0.189524	0.375085	0.361385	0.0827232	0.15666	0.464758	0.368414	0.0764916	0.408206	0.0476731	-0.1436	0.503227	-0.501458	0.0125446	-0.251458	0.235903	-0.366493	0.0781585	0.290865	0.167925
XLOC_013871	Bra022837	AT2G31360	M1	0.42848	0.0367048	0.50467	0.0119021	0.501296	0.0125777	-0.46212	0.0229963	0.469013	0.0207795	-0.320402	0.126907	-0.551886	0.00517523	0.0278187	0.897332	-0.101335	0.637533	-0.0696231	0.746494	0.72336	6.49214e-05	-0.59812	0.00202102	0.176024	0.410647	-0.155344	0.468562	0.403345	0.0506496	0.0351715	0.870396	0.565293	0.00399494	-0.126301	0.556481	-0.660727	0.000440654	-0.174856	0.413807	-0.412807	0.0449844	0.267447	0.20643
XLOC_013887	Bra022868	AT2G31840	M1	-0.290123	0.169062	-0.464026	0.0223651	-0.378818	0.0679303	0.176484	0.409405	-0.0189563	0.929943	0.0788642	0.714141	0.500299	0.0127832	-0.201621	0.344782	0.662118	0.000424323	-0.197805	0.354181	-0.202621	0.342344	-0.382263	0.0652628	-0.929038	5.68839e-11	0.866612	4.36551e-08	0.115618	0.590588	-0.0370102	0.86368	0.632336	0.000915492	-0.405078	0.049572	-0.14407	0.501816	-0.299523	0.155051	-0.781238	6.60256e-06	0.593507	0.00223382
XLOC_013894	Bra022878	AT2G32060	M1	0.467282	0.0213192	0.470077	0.0204534	0.473447	0.0194474	-0.425804	0.0380259	0.586164	0.00261177	-0.451795	0.0266697	-0.453907	0.0258824	0.321274	0.125818	0.136195	0.52571	-0.00411356	0.98478	0.759802	1.65588e-05	-0.906275	1.08922e-09	-0.247997	0.24263	0.141496	0.509567	0.360362	0.0836611	-0.289629	0.169821	0.94025	9.04445e-12	-0.422383	0.0397688	-0.553413	0.00502754	-0.303064	0.149993	-0.770986	1.03745e-05	0.553198	0.00504806
XLOC_013916	Bra022926	NA	M1	0.212305	0.319266	0.335097	0.10945	0.236413	0.266048	-0.392215	0.0580079	0.168351	0.431658	-0.165496	0.439623	-0.220244	0.30107	0.297061	0.158638	0.000500524	0.998148	0.0773141	0.719536	0.326591	0.119325	-0.325172	0.121032	-0.0643048	0.765307	-0.143795	0.502641	0.153265	0.474607	-0.472564	0.019707	0.285244	0.176672	-0.384655	0.063459	0.0225125	0.916841	0.147863	0.490502	-0.231017	0.277431	0.308652	0.142249
XLOC_013918	Bra022927	AT2G33150	M1	-0.00791987	0.970702	0.0398445	0.853347	-0.027448	0.898693	-0.106331	0.620944	-0.157161	0.463312	-0.0308237	0.886308	0.00523969	0.980614	0.312149	0.137551	0.233675	0.271786	0.00220247	0.991851	0.113792	0.596508	-0.249871	0.238972	-0.279711	0.185586	0.0301828	0.888658	0.0498414	0.817097	-0.584826	0.0026862	0.277903	0.188564	-0.261863	0.216427	0.394069	0.0567281	-0.0137537	0.949142	-0.277227	0.189686	0.215084	0.312822
XLOC_013919	Bra022931	AT2G33210	M1	-0.0697501	0.746046	-0.193475	0.365024	-0.136339	0.525271	0.000663572	0.997545	0.164294	0.442997	-0.15382	0.472991	0.224782	0.290965	-0.0208409	0.922997	0.508374	0.0111953	-0.150973	0.481318	0.0581485	0.787246	-0.622905	0.00114923	-0.842322	2.4417e-07	0.772397	9.76222e-06	0.129437	0.546639	-0.120589	0.574607	0.808245	1.77474e-06	-0.452812	0.0262883	-0.315065	0.133719	-0.477203	0.0183742	-0.857761	8.47691e-08	0.574696	0.00331012
XLOC_013921	Bra022936	AT2G33380	M1	0.322496	0.124303	0.136893	0.523571	0.213673	0.316082	-0.194946	0.36132	0.319801	0.12766	-0.546578	0.00571713	-0.0616833	0.774629	0.519646	0.00925387	0.0847162	0.693894	0.33168	0.113341	0.167918	0.432862	-0.672578	0.000317449	-0.583926	0.00273724	0.415523	0.0434534	-0.309672	0.140867	-0.518771	0.00939385	0.675073	0.00029573	-0.443493	0.0299531	0.0545486	0.800148	-0.523017	0.00873071	-0.535637	0.00698509	0.318118	0.129791
XLOC_013943	Bra022978	AT2G34480	M1	0.181532	0.395918	0.204038	0.338906	0.19352	0.364912	-0.178711	0.403424	0.345174	0.098544	-0.268228	0.205059	-0.265243	0.210338	0.1677	0.433466	0.348493	0.0951354	-0.28115	0.183238	0.558099	0.00459632	-0.806438	1.94995e-06	-0.447094	0.0284916	0.348142	0.0954915	0.39515	0.0559921	-0.19567	0.359503	0.913787	4.50361e-10	-0.185922	0.384396	-0.535091	0.00705401	-0.6184	0.00127786	-0.847276	1.76089e-07	0.350542	0.0930748
XLOC_013944	Bra022980	AT2G34570	M1	0.432252	0.034905	0.451692	0.0267086	0.441855	0.0306377	-0.283201	0.179927	0.398998	0.0534317	-0.476004	0.0187114	-0.484516	0.0164225	0.414058	0.0442736	0.139814	0.514664	-0.0330222	0.878256	0.727803	5.55968e-05	-0.942881	5.5793e-12	-0.294992	0.161699	0.128026	0.551057	0.294933	0.161786	-0.440655	0.0311467	0.933183	2.99192e-11	-0.458226	0.0243305	-0.344833	0.0989	-0.43802	0.032289	-0.773455	9.32424e-06	0.460536	0.0235317
XLOC_013948	Bra022989	AT2G34750	M1	0.355011	0.0886976	0.416441	0.0429454	0.380975	0.0662507	-0.334475	0.11015	0.367057	0.077666	-0.385427	0.0628844	-0.480308	0.0175237	0.325444	0.120704	0.18603	0.384114	-0.180392	0.398942	0.74679	2.76783e-05	-0.918939	2.34325e-10	-0.296101	0.160054	0.151829	0.478806	0.422252	0.0398365	-0.379207	0.0676248	0.933122	3.02128e-11	-0.431828	0.0351037	-0.468553	0.0209218	-0.438827	0.0319357	-0.81061	1.56662e-06	0.461729	0.0231275
XLOC_013974	Bra023036	NA	M1	0.399588	0.0530469	0.494576	0.0140171	0.461801	0.0231034	-0.299734	0.154746	0.331737	0.113276	-0.425314	0.0382714	-0.340318	0.103693	0.326201	0.119792	-0.138393	0.518988	0.204931	0.336752	0.436513	0.0329568	-0.502108	0.0124123	-0.0369744	0.863811	-0.0233855	0.913628	0.00560866	0.979249	-0.161261	0.451578	0.476822	0.0184807	-0.221036	0.299291	-0.258006	0.223516	-0.144285	0.501172	-0.281184	0.183183	0.30164	0.152012
XLOC_013996	Bra023072	AT2G36530	M1	0.0767964	0.721341	0.00120855	0.995528	0.0386129	0.857834	0.0144958	0.946401	0.0728767	0.735052	-0.288729	0.171212	-0.0686341	0.749982	0.269144	0.203456	0.158329	0.459954	-0.0904289	0.674323	0.188217	0.378451	-0.580321	0.00295008	-0.504563	0.0119232	0.545363	0.00584763	-0.0147912	0.94531	-0.152837	0.475859	0.637032	0.000815241	-0.44226	0.0304672	-0.205961	0.334275	-0.451493	0.0267839	-0.569101	0.00370445	0.392545	0.057778
XLOC_014008	Bra023088	AT2G36930	M1	0.349104	0.0945176	0.398299	0.0538898	0.371825	0.0735992	-0.414955	0.0437699	0.482635	0.0169075	-0.328754	0.116754	-0.383336	0.0644491	0.249476	0.23974	0.132843	0.536044	-0.0803172	0.709096	0.683629	0.000230728	-0.808352	1.76481e-06	-0.243239	0.252079	0.197325	0.355372	0.424457	0.0387046	-0.186336	0.38332	0.866826	4.29358e-08	-0.613729	0.00142406	-0.531513	0.0075202	-0.0202577	0.925146	-0.731169	4.93362e-05	0.759954	1.64567e-05
XLOC_014015	Bra023104	AT2G37190	M1	0.355354	0.0883681	0.392148	0.0580541	0.365422	0.0790993	-0.393494	0.0571225	0.470676	0.0202716	-0.410917	0.0460743	-0.395322	0.0558756	0.318309	0.129548	0.183331	0.391173	-0.104196	0.628013	0.687996	0.000202637	-0.915708	3.54726e-10	-0.36756	0.0772295	0.275861	0.191966	0.368085	0.076775	-0.274507	0.194246	0.974971	7.41226e-16	-0.518807	0.00938802	-0.517066	0.00967157	-0.332339	0.112584	-0.830509	5.09962e-07	0.627488	0.00102996
XLOC_014017	Bra023108	AT2G37220	M1	0.0889896	0.679235	-0.0177768	0.934293	0.0374399	0.862112	-0.0560604	0.794723	0.338578	0.105587	-0.275388	0.192761	0.0313985	0.884202	0.128083	0.550879	0.390243	0.0593932	-0.125252	0.559789	0.240513	0.2576	-0.697596	0.000151137	-0.689588	0.000193164	0.649283	0.000596948	0.128734	0.548838	-0.116675	0.587173	0.848794	1.58943e-07	-0.278652	0.187325	-0.471332	0.0200739	-0.629385	0.000983776	-0.819096	9.86968e-07	0.414458	0.0440486
XLOC_014018	Bra023109	AT2G37230	M1	0.512203	0.0105013	0.471882	0.0199094	0.495201	0.0138778	-0.329213	0.116214	0.486824	0.0158428	-0.623927	0.00112166	-0.458154	0.0243557	0.48877	0.0153671	0.0296597	0.890576	0.123879	0.564134	0.660016	0.000449208	-0.977281	2.58212e-16	-0.360831	0.0832299	0.243657	0.251239	0.0951933	0.658155	-0.42256	0.0396768	0.946535	2.74289e-12	-0.537733	0.00672553	-0.385635	0.0627307	-0.51957	0.0092659	-0.744534	3.01628e-05	0.475386	0.0188873
XLOC_014019	Bra023113	AT2G37270	M1	0.408024	0.0477824	0.401233	0.0519864	0.408201	0.0476762	-0.32946	0.115924	0.463622	0.0224976	-0.48953	0.0151847	-0.467768	0.0211667	0.392095	0.0580911	0.098761	0.646144	-0.0627291	0.770906	0.650952	0.00057154	-0.839928	2.84807e-07	-0.262921	0.214508	0.11797	0.583003	0.188443	0.377866	-0.382219	0.065296	0.832323	4.57118e-07	-0.0675916	0.753664	-0.446241	0.0288326	-0.777157	7.92606e-06	-0.675189	0.000294751	0.0820145	0.703217
XLOC_014021	Bra023116	AT2G37400	M1	-0.0381257	0.859611	-0.07887	0.714121	-0.0711593	0.741085	-0.0325714	0.879906	0.160701	0.453169	-0.124088	0.563471	0.155241	0.468861	0.0111353	0.958815	0.486876	0.01583	-0.160113	0.454847	0.165496	0.439621	-0.619608	0.00124222	-0.727285	5.66195e-05	0.683363	0.00023254	0.235926	0.267062	-0.0520414	0.809165	0.822416	8.18395e-07	-0.510047	0.0108876	-0.317981	0.129966	-0.23494	0.269125	-0.830988	4.95508e-07	0.734914	4.31079e-05
XLOC_014026	Bra000009	AT2G37600	M1	0.318138	0.129766	0.274523	0.194219	0.305841	0.146108	-0.272914	0.196952	0.521787	0.00891872	-0.377867	0.0686808	-0.261188	0.217656	0.21313	0.317344	0.223829	0.29307	-0.0656128	0.760667	0.574664	0.00331227	-0.832922	4.40777e-07	-0.409743	0.0467616	0.400706	0.0523244	0.302795	0.150373	-0.0638167	0.76704	0.941685	6.96913e-12	-0.417818	0.0421919	-0.614872	0.00138702	-0.326118	0.119892	-0.80826	1.77337e-06	0.63653	0.000825479
XLOC_014027	Bra000011	AT2G37630	M1	0.215722	0.311355	-0.0321669	0.881388	0.151375	0.480139	0.0158612	0.941361	0.40542	0.0493616	-0.255501	0.228204	0.21004	0.324576	-0.219572	0.302585	-0.0150275	0.944438	0.400292	0.0525913	-0.120129	0.576079	-0.14444	0.500705	-0.224355	0.291908	0.355339	0.0883824	-0.260428	0.219047	0.345783	0.0979124	0.194659	0.362039	-0.139227	0.516446	-0.374686	0.0712382	-0.0445754	0.836151	-0.149271	0.486334	0.281118	0.183289
XLOC_014091	Bra000131	NA	M1	0.396603	0.0550143	0.394958	0.0561221	0.399735	0.0529519	-0.270231	0.201566	0.40611	0.0489394	-0.46422	0.0223016	-0.431269	0.035367	0.304438	0.148061	0.136626	0.524391	-0.0673642	0.754468	0.679946	0.000256998	-0.938828	1.16355e-11	-0.339945	0.104097	0.259426	0.220888	0.30455	0.147905	-0.26965	0.202574	0.947849	2.09912e-12	-0.541121	0.00632308	-0.495854	0.0137334	-0.409095	0.0471442	-0.805728	2.02285e-06	0.557742	0.00462802
XLOC_014109	Bra000157	AT2G39990	M1	0.534407	0.00714128	0.533203	0.00729693	0.53777	0.00672107	-0.474905	0.019025	0.66435	0.000399216	-0.576061	0.00321951	-0.533014	0.00732164	0.424604	0.0386303	-0.0147156	0.94559	0.0582932	0.786728	0.756538	1.88913e-05	-0.919829	2.08414e-10	-0.206413	0.333191	0.137807	0.520776	0.227944	0.284051	-0.270851	0.200493	0.91273	5.12416e-10	-0.372552	0.0729933	-0.597086	0.00206715	-0.457828	0.0244703	-0.693285	0.000172641	0.427734	0.0370694
XLOC_014112	Bra000159	AT2G40010	M1	0.0208975	0.922789	-0.0638054	0.76708	-0.0224136	0.917205	-0.0423608	0.844192	0.237887	0.262989	-0.2142	0.314862	0.0274173	0.898806	0.0669371	0.755978	0.423838	0.0390197	-0.233574	0.271998	0.257161	0.22509	-0.749529	2.49045e-05	-0.742453	3.26281e-05	0.711016	9.84077e-05	0.247195	0.244206	-0.12415	0.563274	0.892457	4.62789e-09	-0.564788	0.0040349	-0.456198	0.0250495	-0.467724	0.0211803	-0.906483	1.064e-09	0.63104	0.000944959
XLOC_014123	Bra000182	AT2G40290	M1	0.0771623	0.720065	0.0468139	0.82804	0.072616	0.735967	-0.143735	0.502821	0.264329	0.211972	-0.212581	0.318621	0.0127752	0.952756	0.00998931	0.96305	0.379759	0.0671931	-0.0950337	0.658694	0.262895	0.214556	-0.608117	0.00161841	-0.548215	0.00554516	0.454988	0.0254868	0.196075	0.358491	-0.102544	0.633501	0.765665	1.3e-05	-0.158783	0.458652	-0.366872	0.0778276	-0.493974	0.0141525	-0.72812	5.49781e-05	0.400966	0.0521574
XLOC_014132	Bra000193	AT2G40590	M1	0.350846	0.092772	0.357803	0.0860415	0.362016	0.0821486	-0.269401	0.203007	0.424163	0.038854	-0.377078	0.0693082	-0.370605	0.0746243	0.244875	0.248804	-0.0101219	0.96256	-0.0196069	0.927545	0.584957	0.00267879	-0.764072	1.38928e-05	-0.216649	0.309228	0.290663	0.168233	0.300532	0.153598	-0.0249729	0.907789	0.777642	7.75748e-06	-0.808228	1.77633e-06	-0.523586	0.00864493	0.0716299	0.73943	-0.626994	0.00104227	0.837424	3.3369e-07
XLOC_014137	Bra000198	AT2G40650	M1	-0.0849953	0.692933	0.0575787	0.789284	-0.0279427	0.896877	-0.0958088	0.656077	0.0551723	0.797909	0.0680712	0.751969	-0.114468	0.594313	-0.061998	0.773508	0.602574	0.00183219	-0.531216	0.00756005	0.495413	0.013831	-0.664465	0.000397962	-0.484138	0.016519	0.320121	0.127258	0.690421	0.000188361	-0.220257	0.301041	0.84371	2.23051e-07	-0.227849	0.284259	-0.421137	0.040419	-0.357078	0.086726	-0.904549	1.32051e-09	0.475344	0.0188993
XLOC_014163	Bra000242	AT2G41840	M1	0.0135101	0.950041	-0.0300112	0.889287	-0.00608657	0.977482	-0.123887	0.56411	0.295491	0.160957	-0.151531	0.479681	0.00729872	0.972999	0.0277338	0.897644	0.402522	0.0511673	-0.267889	0.205654	0.313401	0.135897	-0.707765	0.00010942	-0.655746	0.000503664	0.6771	0.000279044	0.356443	0.0873277	-0.0137312	0.949224	0.8816	1.26516e-08	-0.597419	0.00205221	-0.553417	0.00502711	-0.2648	0.211129	-0.879414	1.53087e-08	0.764978	1.33787e-05
XLOC_014170	Bra000253	AT2G42070	M1	-0.0508749	0.813369	-0.164046	0.443696	-0.13696	0.523366	-0.0700701	0.744919	0.108093	0.615139	-0.087827	0.683212	0.11556	0.590775	-0.0938305	0.662765	0.249624	0.239453	-0.119088	0.579411	-0.0441409	0.837728	-0.299278	0.155406	-0.457984	0.0244155	0.382488	0.0650916	0.0374503	0.862074	-0.160921	0.452544	0.321173	0.125943	-0.171799	0.422145	-0.251156	0.236486	-0.502677	0.0122974	-0.42895	0.0364766	-0.000829556	0.996931
[truncated: 9,872 more rows]

## Sheet: D_Network
Supplementary File 1. WGCNA network gene lists with module membership and gene significance for each physiology measure.
[truncated: 10,736 more rows]
[truncated: 4 more columns]
