# Supplementary material for: Temporal network analysis identifies early physiological and transcriptomic indicators of mild drought in Brassica rapa
Source: eLife journal article supplement (doi:10.7554/elife.29655), 2017-08-18
Supplement: supp [file elife-29655-supp-v1.zip › elife_poa_e29655_Supplementary_File_2.xlsx]

## Sheet: JTK
Supplementary File 2. JTK-Cycle analysis results for genes from trait correlated modules with gene significance p.value scores less than 0.01.
Notes: JTK-Cycle v2.1 was used with period parameters set to 24h. See package manual for details.
ID: Unique ID generated by the Tophat alignment program.
		DROUGHT NETWORK					WELL WATERED NETWORK					Selection Based on AmpDiff/ Rhythmicity (A/R)
ID	geneSymbol	Module	BH.Q	ADJ.P	LAG	AMP	Module	BH.Q	ADJ.P	LAG	AMP
XLOC_043513	Bra002957	dM1	0.000100996	2.07e-05	10	1223.19	wM1	2.54e-05	3.88e-06	10	1382.27	A
XLOC_001457	Bra028345	dM1	0.000100996	2.07e-05	6	33.1527	wM5	9.06e-07	2.77e-08	6	126.17	A
XLOC_017665	Bra037701	dM1	4.07e-06	2.61e-07	10	327.795	wM1	8.51e-06	8.78e-07	10	413.975	A
XLOC_047646	Bra040927_Bra040928	dM1	7.89e-05	1.5e-05	9	856.872	wM1	5.62e-05	1.08e-05	10	943.011	A
XLOC_008219	Bra022742	dM1	1.66e-05	1.88e-06	9	1558.39	wM1	6.46e-06	5.92e-07	10	1625.05	A
XLOC_005718	Bra035629	dM1	3.66e-05	5.5e-06	8	107.665	wM1	7.32e-05	1.5e-05	10	169.503	A
XLOC_014696	Bra001213	dM1	9.63e-06	8.78e-07	8	86.2611	wM1	4.35e-05	7.75e-06	10	144.304	A
XLOC_021380	Bra029599_Bra029601	dM1	0.000129226	2.83e-05	8	160.037	wM1	0.000640495	0.000211519	8	216.957	A
XLOC_042038	Bra007558	dM1	0.000333867	9.26e-05	10	39.7415	wM1	5.62e-05	1.08e-05	10	93.6146	A
XLOC_037392	Bra028027	dM1	7.89e-05	1.5e-05	10	121.006	wM1	9.34e-05	2.07e-05	10	165.698	A
XLOC_002493	Bra011664	dM1	2.85e-05	3.88e-06	10	42.169	wM1	3.32e-05	5.5e-06	10	79.0378	A
XLOC_000011	Bra011871	dM1	0.000263727	6.95e-05	9	50.4223	wM1	4.35e-05	7.75e-06	8	86.359	A
XLOC_003753	Bra029932	dM1	3.66e-05	5.5e-06	10	62.0475	wM1	7.32e-05	1.5e-05	10	97.0155	A
XLOC_031090	Bra003680_Bra003681_Bra003682	dM1	0.000100996	2.07e-05	9	84.8329	wM5	9.34e-05	2.07e-05	8	119.203	A
XLOC_005509	Bra020079	dM1	0.00280851	0.00120739	10	129.917	wM1	0.00412171	0.00190181	10	164.218	A
XLOC_024468	Bra018017	dM1	0.000526591	0.000161509	10	56.9978	wM1	9.34e-05	2.07e-05	10	89.128	A
XLOC_039590	Bra039041	dM1	1.29e-06	4.44e-08	10	78.9195	wM1	1.2e-06	4.44e-08	10	109.615	A
XLOC_009015	Bra021990	dM1	0.000820427	0.000275495	10	40.6067	wM1	0.000120338	2.83e-05	10	71.1718	A
XLOC_014178	Bra000263	dM1	0.00101527	0.000356905	8	55.1508	wM5	4.35e-05	7.75e-06	8	85.0546	A
XLOC_011615	Bra001450	dM1	1.27e-05	1.29e-06	10	51.182	wM1	1.6e-06	7.04e-08	10	79.899	A
XLOC_001930	Bra021516_Bra021517	dM1	0.00503389	0.00237097	10	28.2188	wM1	7.32e-05	1.5e-05	10	56.7926	A
XLOC_016849	Bra030292	dM1	1.29e-06	4.44e-08	10	48.2532	wM1	4.86e-06	3.95e-07	10	73.8714	A
XLOC_003360	Bra026380	dM1	6.13e-05	1.08e-05	10	43.632	wM1	0.000511887	0.000161509	10	68.7181	A
XLOC_030639	Bra012129	dM1	0.00606981	0.00294312	10	22.5873	wM1	0.00015476	3.84e-05	12	47.2207	A
XLOC_002693	Bra011313	dM1	0.00870082	0.00447811	10	34.8392	wM1	0.00150923	0.000589779	9	58.4629	A
XLOC_004800	Bra034069	dM1	0.000263727	6.95e-05	10	28.277	wM1	0.00040536	0.000122629	8	51.3323	A
XLOC_028211	Bra015131	dM1	7.33e-06	5.92e-07	10	33.9927	wM1	3.32e-05	5.5e-06	10	56.5982	A
XLOC_028957	Bra003407	dM1	0.000207844	5.18e-05	10	70.1344	wM1	0.00040536	0.000122629	10	91.093	A
XLOC_035551	Bra016707	dM1	6.13e-05	1.08e-05	10	27.8017	wM1	7.32e-05	1.5e-05	9	48.5908	A
XLOC_013894	Bra022878	dM1	5.45e-06	3.95e-07	10	46.9233	wM1	2.56e-07	3.6e-09	10	67.6145	A
XLOC_040462	Bra037918	dM1	0.000333867	9.26e-05	10	52.4136	wM1	4.35e-05	7.75e-06	10	71.7841	A
XLOC_033987	Bra014334	dM1	0.00417337	0.00190181	12	49.6863	wM1	0.000987752	0.000356905	12	69.0016	A
XLOC_014309	Bra000501	dM1	5.45e-06	3.95e-07	10	69.1295	wM1	9.34e-05	2.07e-05	10	88.1812	A
XLOC_011411	Bra001052	dM1	2.17e-05	2.71e-06	8	22.6959	wM1	5.62e-05	1.08e-05	8	40.8722	A
XLOC_046398	Bra034985	dM1	7.89e-05	1.5e-05	10	34.935	wM1	0.000511887	0.000161509	10	53.034	A
XLOC_039382	Bra032588	dM1	5.45e-06	3.95e-07	10	17.6801	wM1	0.000511887	0.000161509	10	35.737	A
XLOC_010456	Bra028948_Bra028951_Bra028952	dM1	0.000526591	0.000161509	10	32.5644	wM1	0.000987752	0.000356905	10	50.1542	A
XLOC_044354	Bra009039	dM1	0.00503389	0.00237097	12	38.7226	wM1	6.46e-06	5.92e-07	12	56.1436	A
XLOC_044847	Bra015319	dM1	0.000100996	2.07e-05	10	39.1946	wM1	2.54e-05	3.88e-06	10	56.104	A
XLOC_011449	Bra001127	dM1	0.000164103	3.84e-05	10	56.2518	wM1	7.32e-05	1.5e-05	10	73.0414	A
XLOC_047177	Bra040409	dM1	2.85e-05	3.88e-06	10	29.5055	wM1	3.32e-05	5.5e-06	10	46.1876	A
XLOC_036093	Bra035939	dM1	4.77e-05	7.75e-06	10	14.9859	wM1	1.11e-05	1.29e-06	10	31.5299	A
XLOC_018143	Bra032750	dM1	3.66e-05	5.5e-06	8	39.7323	wM5	4.86e-06	3.95e-07	8	56.2455	A
XLOC_012105	Bra012916	dM1	5.45e-06	3.95e-07	8	40.1169	wM1	3.32e-05	5.5e-06	8	56.5714	A
XLOC_021188	Bra034834	dM1	6.13e-05	1.08e-05	10	19.4475	wM1	2.54e-05	3.88e-06	10	35.8257	A
XLOC_046061	Bra009292	dM1	2.85e-05	3.88e-06	10	36.3728	wM1	4.35e-05	7.75e-06	10	52.3952	A
XLOC_002558	Bra011551	dM1	0.000100996	2.07e-05	10	23.7267	wM1	1.47e-05	1.88e-06	10	39.629	A
XLOC_023814	Bra018669	dM1	1.66e-05	1.88e-06	10	57.3449	wM1	2.54e-05	3.88e-06	10	73.1764	A
XLOC_023328	Bra029780	dM1	0.000100996	2.07e-05	10	31.6589	wM1	3.32e-05	5.5e-06	10	47.4667	A
XLOC_005963	Bra033999	dM1	0.00606981	0.00294312	10	27.7495	wM1	0.00602704	0.00294312	10	43.5035	A
XLOC_038822	Bra031032	dM1	0.000526591	0.000161509	9	68.3808	wM1	0.00015476	3.84e-05	10	84.0255	A
XLOC_010544	Bra029112	dM1	0.00503389	0.00237097	10	21.2406	wM1	0.000511887	0.000161509	10	36.8374	A
XLOC_005604	Bra020280	dM1	6.13e-05	1.08e-05	10	56.6681	wM1	1.47e-05	1.88e-06	10	72.2451	A
XLOC_007947	Bra020113	dM1	2.17e-05	2.71e-06	10	201.929	wM1	5.62e-05	1.08e-05	10	217.409	A
XLOC_042381	Bra031123	dM1	7.33e-06	5.92e-07	10	35.3322	wM1	4.35e-05	7.75e-06	10	50.7824	A
XLOC_003291	Bra026484	dM1	0.00606981	0.00294312	9	7.37717	wM1	0.00278927	0.00120739	10	22.6254	A
XLOC_013669	Bra028924	dM1	0.000820427	0.000275495	10	29.704	wM1	0.000987752	0.000356905	10	44.8851	A
XLOC_027636	Bra025248	dM1	0.000207844	5.18e-05	9	16.9909	wM5	0.000253031	6.95e-05	8	32.135	A
XLOC_017974	Bra014721	dM1	0.000100996	2.07e-05	8	44.7138	wM1	9.34e-05	2.07e-05	10	59.4202	A
XLOC_021633	Bra004654	dM1	5.45e-06	3.95e-07	8	52.6788	wM1	1.6e-06	7.04e-08	10	67.3649	A
XLOC_000799	Bra013905	dM1	3.15e-06	1.71e-07	10	50.4023	wM1	5.62e-05	1.08e-05	10	64.8441	A
XLOC_005215	Bra028708	dM1	0.000129226	2.83e-05	10	25.7419	wM1	2.73e-06	1.71e-07	10	40.0519	A
XLOC_005133	Bra028839	dM1	0.00503389	0.00237097	6	6.97596	wM5	0.0033966	0.00151876	6	21.2077	A
XLOC_037968	Bra006936	dM1	4.77e-05	7.75e-06	10	62.3548	wM1	7.32e-05	1.5e-05	10	76.5429	A
XLOC_043796	Bra002483	dM1	0.000421201	0.000122629	10	42.8153	wM1	2.54e-05	3.88e-06	10	56.5629	A
XLOC_031344	Bra004087_snoR74	dM1	7.33e-06	5.92e-07	10	20.4449	wM1	0.000253031	6.95e-05	10	33.7131	A
XLOC_016937	Bra032134	dM1	0.000526591	0.000161509	10	19.8232	wM1	0.00015476	3.84e-05	10	33.0672	A
XLOC_043036	Bra015607_Bra015608	dM1	0.00153479	0.000589779	6	10.924	wM5	0.000640495	0.000211519	8	24.1356	A
XLOC_005058	Bra028590	dM1	0.000526591	0.000161509	9	42.5218	wM1	0.00015476	3.84e-05	9	55.4371	A
XLOC_010772	Bra023052	dM1	2.17e-05	2.71e-06	10	31.3171	wM1	3.67e-06	2.61e-07	10	44.0748	A
XLOC_034688	Bra034643	dM1	2.85e-05	3.88e-06	10	18.9856	wM1	1.11e-05	1.29e-06	10	31.538	A
XLOC_014019	Bra023113	dM1	7.89e-05	1.5e-05	8	13.6163	wM1	0.00150923	0.000589779	10	25.9005	A
XLOC_034200	Bra013970	dM1	1.27e-05	1.29e-06	10	71.3769	wM1	1.94e-05	2.71e-06	10	83.6199	A
XLOC_010227	Bra006429	dM1	0.00503389	0.00237097	6	74.7334	wM5	0.000987752	0.000356905	6	86.7592	A
XLOC_007555	Bra028856	dM1	3.66e-05	5.5e-06	10	18.6784	wM1	1.11e-05	1.29e-06	10	30.4903	A
XLOC_018112	Bra033473	dM1	0.000263727	6.95e-05	12	25.4634	wM1	5.62e-05	1.08e-05	12	37.1627	A
XLOC_011539	Bra001300	dM1	0.00101527	0.000356905	10	23.6794	wM1	0.00278927	0.00120739	10	35.2459	A
XLOC_043977	Bra002156	dM1	7.89e-05	1.5e-05	8	8.77442	wM1	0.00015476	3.84e-05	8	20.2691	A
XLOC_042782	Bra031672	dM1	0.000421201	0.000122629	10	18.1683	wM1	0.000253031	6.95e-05	10	29.5933	A
XLOC_019267	Bra016912_Bra016913	dM1	7.89e-05	1.5e-05	10	20.9846	wM1	0.000120338	2.83e-05	12	32.3357	A
XLOC_000938	Bra026312_Bra026313	dM1	5.45e-06	3.95e-07	8	19.3827	wM5	2.07e-06	1.1e-07	8	30.5783	A
XLOC_010351	Bra006689	dM1	0.000129226	2.83e-05	10	54.2303	wM1	1.47e-05	1.88e-06	10	65.1923	A
XLOC_035853	Bra036285	dM1	6.13e-05	1.08e-05	8	24.9744	wM1	9.34e-05	2.07e-05	8	35.5972	A
XLOC_027150	Bra009706_Bra009707	dM1	4.77e-05	7.75e-06	10	27.0202	wM1	1.94e-05	2.71e-06	10	37.5459	A
XLOC_038503	Bra007669	dM1	5.45e-06	3.95e-07	10	71.2247	wM1	4.35e-05	7.75e-06	10	81.6949	A
XLOC_018465	Bra030284	dM1	2.33e-06	1.1e-07	8	135.51	wM1	8.51e-06	8.78e-07	9	145.92	A
XLOC_015776	Bra019068_Bra019069_Bra019070	dM1	0.000207844	5.18e-05	10	27.3353	wM1	7.32e-05	1.5e-05	10	37.7017	A
XLOC_013028	Bra005749	dM1	0.000100996	2.07e-05	10	14.3225	wM1	2.54e-05	3.88e-06	8	24.6232	A
XLOC_000316	Bra011291	dM1	0.00280851	0.00120739	8	15.5497	wM1	0.000987752	0.000356905	8	25.82	A
XLOC_037529	Bra023149	dM1	0.00230246	0.000955433	8	16.8337	wM5	0.000640495	0.000211519	8	26.9084	A
XLOC_045725	Bra008643	dM1	0.000263727	6.95e-05	10	30.7821	wM1	0.000253031	6.95e-05	10	40.8274	A
XLOC_007548	Bra028868	dM1	1.27e-05	1.29e-06	10	12.894	wM1	0.000987752	0.000356905	10	2.73615	A
XLOC_019853	Bra005209	dM1	0.000526591	0.000161509	8	29.0009	wM1	0.000987752	0.000356905	10	18.8011	A
XLOC_030593	Bra012203	dM1	0.00230246	0.000955433	6	87.8616	wM5	0.00602704	0.00294312	6	77.0923	A
XLOC_010410	Bra006809	dM1	4.77e-05	7.75e-06	10	32.2268	wM1	2.54e-05	3.88e-06	10	21.4375	A
XLOC_042377	Bra031129	dM1	4.07e-06	2.61e-07	7	35.181	wM5	4.86e-06	3.95e-07	8	24.1833	A
XLOC_023883	Bra020009	dM1	0.00606981	0.00294312	11	38.0072	wM1	0.0018569	0.000752483	10	26.59	A
XLOC_033259	Bra010878	dM1	0.000263727	6.95e-05	10	50.3273	wM1	6.46e-06	5.92e-07	10	38.36	A
XLOC_007579	Bra028814	dM1	0.000526591	0.000161509	10	37.6732	wM1	0.0033966	0.00151876	8	25.2289	A
XLOC_015152	Bra013215	dM1	4.77e-05	7.75e-06	10	84.171	wM1	8.51e-06	8.78e-07	10	71.5012	A
XLOC_020168	Bra018340	dM1	0.000164103	3.84e-05	6	48.9768	wM5	1.94e-05	2.71e-06	6	36.29	A
XLOC_023656	Bra018960	dM1	0.000263727	6.95e-05	10	31.875	wM1	0.000511887	0.000161509	9	18.7354	A
XLOC_022861	Bra022350	dM1	0.000100996	2.07e-05	10	29.3542	wM1	3.32e-05	5.5e-06	10	16.0175	A
XLOC_015508	Bra012595_Bra012596	dM1	0.00230246	0.000955433	8	37.1677	wM5	0.00122491	0.000459966	8	23.3678	A
XLOC_012248	Bra012659	dM1	4.07e-06	2.61e-07	10	45.2669	wM1	5.62e-05	1.08e-05	10	31.2594	A
XLOC_044727	Bra015570	dM1	0.000100996	2.07e-05	10	53.3402	wM5	0.000987752	0.000356905	10	39.2444	A
XLOC_022981	Bra027168	dM1	0.000164103	3.84e-05	8	41.9115	wM5	0.000253031	6.95e-05	8	27.4864	A
XLOC_045207	Bra002799	dM1	0.000207844	5.18e-05	10	44.6567	wM1	0.00412171	0.00190181	10	29.8925	A
XLOC_012744	Bra023984	dM1	0.00503389	0.00237097	10	31.6592	wM1	0.00499771	0.00237097	8	15.7272	A
XLOC_045517	Bra002216_Bra002217	dM1	1.29e-06	4.44e-08	6	60.1213	wM5	1.6e-06	7.04e-08	6	43.9282	A
XLOC_031017	Bra003526	dM1	0.000333867	9.26e-05	12	87.6237	wM1	0.00228097	0.000955433	12	71.4172	A
XLOC_035953	Bra039066	dM1	0.000207844	5.18e-05	10	31.5551	wM1	0.00150923	0.000589779	12	15.0048	A
XLOC_028207	Bra015135	dM1	6.13e-05	1.08e-05	8	99.818	wM1	0.000987752	0.000356905	10	82.5979	A
XLOC_028629	Bra012230	dM1	4.77e-05	7.75e-06	6	49.4489	wM5	2.07e-06	1.1e-07	6	28.652	A
XLOC_005487	Bra023715	dM1	0.000207844	5.18e-05	10	51.5061	wM1	9.34e-05	2.07e-05	10	30.5809	A
XLOC_015218	Bra013091	dM1	0.00188574	0.000752483	10	92.3596	wM1	0.000640495	0.000211519	10	71.1285	A
XLOC_031370	Bra004138	dM1	0.000207844	5.18e-05	8	69.805	wM5	9.34e-05	2.07e-05	8	48.4899	A
XLOC_008550	Bra007945_Bra007947_Bra007949_Bra007950_Bra007951	dM1	2.85e-05	3.88e-06	10	56.5933	wM1	5.62e-05	1.08e-05	10	31.0752	A
XLOC_018580	Bra032118	dM1	4.77e-05	7.75e-06	9	90.8295	wM1	0.000198087	5.18e-05	9	64.991	A
XLOC_035397	Bra016459	dM1	3.66e-05	5.5e-06	10	258.299	wM1	1.47e-05	1.88e-06	10	230.853	A
XLOC_026300	Bra019632	dM1	0.000658514	0.000211519	10	92.8085	wM14	0.00499771	0.00237097	10	61.9242	A
XLOC_017808	Bra014401	dM1	0.000820427	0.000275495	8	266.689	wM1	0.0033966	0.00151876	9	232.282	A
XLOC_036384	Bra036675_Bra036676	dM1	0.00280851	0.00120739	8	109.38	wM1	0.0033966	0.00151876	11	70.611	A
XLOC_032017	Bra030844	dM1	1.27e-05	1.29e-06	10	139.1	wM1	0.000322366	9.26e-05	12	97.5807	A
XLOC_013715	Bra029007	dM1	5.45e-06	3.95e-07	8	235.385	wM5	4.86e-06	3.95e-07	8	183.495	A
XLOC_014391	Bra000663	dM1	1.75e-06	7.04e-08	8	203.107	wM5	6.46e-08	3.58e-10	8	150.607	A
XLOC_029095	Bra003644_Bra003645_Bra003647	dM1	0.000333867	9.26e-05	12	164.712	wM1	0.000640495	0.000211519	12	99.1208	A
XLOC_002756	Bra011208_Bra011209	dM1	1.27e-05	1.29e-06	10	598.92	wM1	2.54e-05	3.88e-06	10	473.206	A
XLOC_026256	Bra019722	dM1	0.00725001	0.0036379	9	216.148	wM5	0.00499771	0.00237097	8	52.8195	A
XLOC_011942	Bra013206	dM1	9.63e-06	8.78e-07	10	1054.4	wM1	1.11e-05	1.29e-06	10	790.029	A
XLOC_043575	Bra002848_Bra002849	dM1	0.000164103	3.84e-05	8	2.36012	wM1	0.0103934	0.00549005	7	2.00143	R
XLOC_043534	Bra002926	dM1	0.000263727	6.95e-05	10	8.70972	wM1	0.0103934	0.00549005	10	3.42353	R
XLOC_013428	Bra006446_Bra006447	dM1	0.000421201	0.000122629	10	5.12617	wM1	0.0103934	0.00549005	10	1.83035	R
XLOC_009987	Bra005968	dM1	0.000526591	0.000161509	8	0.834032	wM5	0.0103934	0.00549005	4	1.55065	R
XLOC_010056	Bra006100	dM1	0.000526591	0.000161509	8	4.6254	wM5	0.0103934	0.00549005	8	6.82846	R
XLOC_046853	Bra039260	dM1	0.00101527	0.000356905	8	16.1631	wM1	0.0103934	0.00549005	8	14.742	R
XLOC_020982	Bra027221	dM1	0.00124721	0.000459966	6	1.78274	wM1	0.0103934	0.00549005	8	1.01123	R
XLOC_000046	Bra011819	dM1	0.00153479	0.000589779	8	11.4241	wM5	0.0103934	0.00549005	8	18.0217	R
XLOC_046049	Bra009273	dM1	0.00153479	0.000589779	8	3.80964	wM5	0.0103934	0.00549005	8	5.33796	R
XLOC_021549	Bra004515	dM1	0.00280851	0.00120739	10	0.875731	wM1	0.0103934	0.00549005	10	0.490866	R
XLOC_026462	Bra025913	dM1	0.00280851	0.00120739	8	1.82714	wM5	0.0103934	0.00549005	6	0.650623	R
XLOC_017184	Bra021653	dM1	0.00606981	0.00294312	6	11.0237	wM5	0.0103934	0.00549005	6	5.08516	R
XLOC_037097	Bra017424	dM1	0.00606981	0.00294312	6	1.30079	wM1	0.0103934	0.00549005	8	1.47022	R
XLOC_003727	Bra029906	dM1	0.00725001	0.0036379	8	3.54784	wM1	0.0103934	0.00549005	8	10.5007	R
XLOC_038829	Bra031016	dM1	0.00725001	0.0036379	10	1.45355	wM1	0.0103934	0.00549005	10	2.48163	R
XLOC_026981	Bra024276	dM1	4.77e-05	7.75e-06	8	1.52466	wM1	0.0124242	0.00670393	8	2.00514	R
XLOC_019075	Bra017231	dM1	0.000207844	5.18e-05	12	18.9346	wM1	0.0124242	0.00670393	12	16.3163	R
XLOC_014123	Bra000182	dM1	0.00101527	0.000356905	12	1.73559	wM1	0.0124242	0.00670393	12	1.3173	R
XLOC_046898	Bra039364	dM1	0.00101527	0.000356905	6	13.6871	wM3	0.0124242	0.00670393	6	3.63113	R
XLOC_017873	Bra014505	dM1	0.00153479	0.000589779	6	1.08489	wM5	0.0124242	0.00670393	8	0.917386	R
XLOC_037762	Bra024597	dM1	0.00188574	0.000752483	10	4.29871	wM1	0.0124242	0.00670393	10	2.8734	R
XLOC_000467	Bra013269	dM1	0.00230246	0.000955433	10	1.54312	wM5	0.0124242	0.00670393	8	2.30743	R
XLOC_020718	Bra031236_Bra031237	dM1	0.003423	0.00151876	10	2.67083	wM1	0.0124242	0.00670393	11	2.06291	R
XLOC_031735	Bra015880	dM1	0.00503389	0.00237097	9	6.23472	wM1	0.0124242	0.00670393	10	6.6507	R
XLOC_008347	Bra022520	dM1	0.00725001	0.0036379	8	1.70387	wM1	0.0124242	0.00670393	11	1.91658	R
XLOC_017609	Bra016892	dM1	0.000100996	2.07e-05	8	15.8672	wM5	0.0147373	0.00815436	7	9.44345	R
XLOC_028611	Bra012259_Bra012260	dM1	0.00153479	0.000589779	10	4.87465	wM1	0.0147373	0.00815436	9	5.27325	R
XLOC_024850	Bra024404	dM1	0.00188574	0.000752483	6	4.60213	wM11	0.0147373	0.00815436	8	2.91823	R
XLOC_007500	Bra028595	dM1	0.00230246	0.000955433	6	3.15454	wM5	0.0147373	0.00815436	6	0.831706	R
XLOC_044024	Bra002071	dM1	0.00230246	0.000955433	10	2.56116	wM1	0.0147373	0.00815436	10	0.826212	R
XLOC_022168	Bra018282_Bra018283	dM1	0.003423	0.00151876	9	10.1845	wM1	0.0147373	0.00815436	8	5.4577	R
XLOC_038211	Bra007283	dM1	0.003423	0.00151876	10	3.58567	wM1	0.0147373	0.00815436	12	5.40484	R
XLOC_015274	Bra012992_Bra012993_Bra012996	dM1	0.00417337	0.00190181	7	5.11047	wM5	0.0147373	0.00815436	8	5.53799	R
XLOC_007749	Bra023446	dM1	0.00606981	0.00294312	10	8.06123	wM1	0.0147373	0.00815436	10	8.34301	R
XLOC_032938	Bra010321	dM1	0.00606981	0.00294312	8	9.80271	wM5	0.0147373	0.00815436	8	7.65957	R
XLOC_038962	Bra026816_Bra026817	dM1	0.00725001	0.0036379	10	2.68483	wM1	0.0147373	0.00815436	12	1.91358	R
XLOC_031933	Bra035090_Bra035091	dM1	0.00870082	0.00447811	8	2.29285	wM1	0.0147373	0.00815436	8	0.332566	R
XLOC_044078	Bra001977_Bra001978	dM1	9.63e-06	8.78e-07	8	3.26726	wM1	0.0173944	0.00988072	8	4.07647	R
XLOC_040560	Bra032783	dM1	7.89e-05	1.5e-05	10	1.17084	wM1	0.0173944	0.00988072	12	0.864714	R
XLOC_030800	Bra003139	dM1	0.000164103	3.84e-05	8	2.51384	wM5	0.0173944	0.00988072	8	1.63363	R
XLOC_030965	Bra003427_Bra003428	dM1	0.000263727	6.95e-05	10	6.91246	wM1	0.0173944	0.00988072	10	4.85174	R
XLOC_025164	Bra010114_Bra010115	dM1	0.000658514	0.000211519	8	7.71355	wM1	0.0173944	0.00988072	8	6.86643	R
XLOC_037018	Bra027474	dM1	0.00101527	0.000356905	10	5.45724	wM1	0.0173944	0.00988072	10	2.75552	R
XLOC_028840	Bra003192	dM1	0.00124721	0.000459966	9	4.84696	wM5	0.0173944	0.00988072	8	2.97657	R
XLOC_047505	Bra040794	dM1	0.00124721	0.000459966	10	3.03936	wM1	0.0173944	0.00988072	8	2.62577	R
XLOC_011922	Bra013239	dM1	0.00153479	0.000589779	10	10.6918	wM1	0.0173944	0.00988072	8	12.4043	R
XLOC_023508	Bra039171	dM1	0.00230246	0.000955433	6	2.95344	wM5	0.0173944	0.00988072	6	0.117804	R
XLOC_045664	Bra001970	dM1	0.00230246	0.000955433	10	2.92749	wM1	0.0173944	0.00988072	11	2.99421	R
XLOC_045821	Bra008824_Bra008825_Bra008826	dM1	0.00280851	0.00120739	10	40.0329	wM1	0.0173944	0.00988072	12	26.1325	R
XLOC_044423	Bra009158	dM1	0.00417337	0.00190181	9	1.53598	wM1	0.0173944	0.00988072	8	2.39059	R
XLOC_011624	Bra001466	dM1	0.00606981	0.00294312	8	6.4097	wM5	0.0173944	0.00988072	6	4.96842	R
XLOC_015688	Bra019221	dM1	0.00606981	0.00294312	8	3.22308	wM5	0.0173944	0.00988072	7	2.22213	R
XLOC_016432	Bra014820	dM1	0.00606981	0.00294312	10	2.06122	wM1	0.0173944	0.00988072	10	1.85396	R
XLOC_011517	Bra001263	dM1	0.00725001	0.0036379	10	1.86514	wM1	0.0173944	0.00988072	10	3.59585	R
XLOC_018402	Bra025446	dM1	0.00725001	0.0036379	6	1.14807	wM1	0.0173944	0.00988072	8	2.07487	R
XLOC_024848	Bra024401	dM1	0.00725001	0.0036379	9	13.4817	wM1	0.0173944	0.00988072	11	8.1603	R
XLOC_015347	Bra012869_Bra012870	dM1	0.000100996	2.07e-05	6	2.09862	wM5	0.0204803	0.0119277	6	1.08852	R
XLOC_036218	Bra037177	dM1	0.000100996	2.07e-05	12	7.98075	wM11	0.0204803	0.0119277	12	0	R
XLOC_029852	Bra015630	dM1	0.000129226	2.83e-05	6	2.14826	wM5	0.0204803	0.0119277	4	1.65018	R
XLOC_035899	Bra037363	dM1	0.000207844	5.18e-05	10	2.01535	wM1	0.0204803	0.0119277	12	3.22844	R
XLOC_000921	Bra026346	dM1	0.000526591	0.000161509	10	1.56512	wM5	0.0204803	0.0119277	8	1.15562	R
XLOC_000286	Bra011352	dM1	0.000658514	0.000211519	10	18.5591	wM1	0.0204803	0.0119277	12	6.19397	R
XLOC_016502	Bra033459	dM1	0.000820427	0.000275495	10	1.26989	wM1	0.0204803	0.0119277	10	1.48023	R
XLOC_013365	Bra006338	dM1	0.00101527	0.000356905	10	4.31201	wM1	0.0204803	0.0119277	10	1.32172	R
XLOC_003050	Bra013537	dM1	0.00124721	0.000459966	10	3.03543	wM5	0.0204803	0.0119277	7	2.60386	R
XLOC_007176	Bra029328_Bra029329	dM1	0.00606981	0.00294312	6	3.35809	wM1	0.0204803	0.0119277	6	1.66033	R
XLOC_035817	Bra030500	dM1	0.00725001	0.0036379	8	0.371867	wM1	0.0204803	0.0119277	10	2.97409	R
XLOC_043624	Bra002779	dM1	7.33e-06	5.92e-07	10	4.17165	wM1	0.0241241	0.0143459	10	1.29061	R
XLOC_007477	Bra028543	dM1	0.000820427	0.000275495	10	13.1559	wM1	0.0241241	0.0143459	12	4.10016	R
XLOC_041125	Bra023213	dM1	0.00101527	0.000356905	10	1.45428	wM1	0.0241241	0.0143459	10	1.90318	R
XLOC_002821	Bra011079	dM1	0.00124721	0.000459966	8	5.9339	wM1	0.0241241	0.0143459	10	3.70559	R
XLOC_027063	Bra024429	dM1	0.00280851	0.00120739	8	6.13726	wM5	0.0241241	0.0143459	8	9.41965	R
XLOC_015600	Bra019387	dM1	0.003423	0.00151876	10	3.33378	wM1	0.0241241	0.0143459	10	3.04173	R
XLOC_037534	Bra023135_Bra023136	dM1	0.003423	0.00151876	8	2.3686	wM3	0.0241241	0.0143459	6	4.77488	R
XLOC_043967	Bra002173	dM1	0.00606981	0.00294312	8	1.44356	wM1	0.0241241	0.0143459	8	3.43442	R
XLOC_002397	Bra011872	dM1	0.00870082	0.00447811	8	4.67984	wM5	0.0241241	0.0143459	8	5.6688	R
XLOC_041739	Bra007087	dM1	0.00870082	0.00447811	6	15.0069	wM3	0.0241241	0.0143459	4	7.0541	R
XLOC_024753	Bra038651	dM1	0.000263727	6.95e-05	8	2.07653	wM5	0.0282411	0.0171921	6	0.910308	R
XLOC_046593	Bra035988	dM1	0.000421201	0.000122629	6	6.84098	wM5	0.0282411	0.0171921	6	7.06279	R
XLOC_011064	Bra000474	dM1	0.00101527	0.000356905	8	32.0771	wM1	0.0282411	0.0171921	8	50.4381	R
XLOC_012735	Bra024005	dM1	0.00230246	0.000955433	6	1.83134	wM1	0.0282411	0.0171921	10	2.43994	R
XLOC_028701	Bra012109_Bra012110_Bra012111	dM1	0.00230246	0.000955433	8	2.97337	wM1	0.0282411	0.0171921	11	2.88349	R
XLOC_046359	Bra034990	dM1	0.00230246	0.000955433	10	2.5704	wM1	0.0282411	0.0171921	8	4.03172	R
XLOC_041097	Bra023259	dM1	0.00280851	0.00120739	10	2.01642	wM1	0.0282411	0.0171921	9	3.62499	R
XLOC_001722	Bra037587_Bra037588	dM1	0.003423	0.00151876	10	1.60432	wM5	0.0282411	0.0171921	8	1.22142	R
XLOC_002504	Bra011643	dM1	0.003423	0.00151876	6	1.71786	wM5	0.0282411	0.0171921	6	1.87736	R
XLOC_014688	Bra001198	dM1	0.00417337	0.00190181	10	2.42275	wM1	0.0282411	0.0171921	8	2.68547	R
XLOC_042738	Bra031745	dM1	0.00417337	0.00190181	10	0.893528	wM1	0.0282411	0.0171921	8	0.998682	R
XLOC_030573	Bra012244	dM1	0.00503389	0.00237097	7	9.57518	wM5	0.0282411	0.0171921	6	0	R
XLOC_033178	Bra010705_Bra010706_Bra010710_Bra010711	dM1	0.00606981	0.00294312	6	12.1325	wM5	0.0282411	0.0171921	4	8.02467	R
XLOC_036951	Bra027568	dM1	0.00606981	0.00294312	6	3.62406	wM5	0.0282411	0.0171921	6	2.65388	R
XLOC_045971	Bra009109	dM1	0.00870082	0.00447811	6	8.20951	wM5	0.0282411	0.0171921	8	8.00869	R
XLOC_042021	Bra007521	dM1	0.000658514	0.000211519	8	3.33846	wM1	0.0329852	0.0205299	10	1.81422	R
XLOC_028333	Bra014904	dM1	0.000820427	0.000275495	8	6.72939	wM1	0.0329852	0.0205299	8	3.94962	R
XLOC_022006	Bra005414	dM1	0.00188574	0.000752483	8	4.16684	wM5	0.0329852	0.0205299	8	7.2856	R
XLOC_009950	Bra005887	dM1	0.00606981	0.00294312	11	16.2918	wM1	0.0329852	0.0205299	12	10.036	R
XLOC_002403	Bra011858	dM1	0.00725001	0.0036379	8	5.56097	wM1	0.0329852	0.0205299	9	4.4173	R
XLOC_008206	Bra035564	dM1	0.00870082	0.00447811	6	2.77702	wM5	0.0329852	0.0205299	6	1.40339	R
XLOC_036105	Bra035910	dM1	0.00870082	0.00447811	8	7.43749	wM5	0.0329852	0.0205299	6	3.47062	R
XLOC_041785	Bra007159	dM1	0.00870082	0.00447811	12	2.78184	wM1	0.0329852	0.0205299	12	1.56108	R
XLOC_008187	Bra035603	dM1	7.89e-05	1.5e-05	8	4.20342	wM5	0.0361134	0.0224802	9	1.50735	R
XLOC_016047	Bra017723	dM1	0.000129226	2.83e-05	6	9.95366	wM1	0.0385429	0.0244305	8	16.1365	R
XLOC_014820	Bra001426	dM1	0.000421201	0.000122629	9	4.13014	wM5	0.0385429	0.0244305	6	3.4417	R
XLOC_021332	Bra029684_Bra029685	dM1	0.000526591	0.000161509	6	1.9765	wM5	0.0385429	0.0244305	6	0.789994	R
XLOC_020406	Bra030405_Bra030406	dM1	0.00153479	0.000589779	10	7.64976	wM1	0.0385429	0.0244305	10	6.93849	R
XLOC_046557	Bra035997	dM1	0.00153479	0.000589779	10	10.4021	wM1	0.0385429	0.0244305	8	6.0616	R
XLOC_021245	Bra029833_Bra029834	dM1	0.00417337	0.00190181	6	4.90591	wM5	0.0385429	0.0244305	8	0	R
XLOC_028495	Bra012446_Bra012447	dM1	0.00417337	0.00190181	10	19.8557	wM1	0.0385429	0.0244305	8	14.7906	R
XLOC_001571	Bra023822	dM1	0.00606981	0.00294312	10	9.1576	wM1	0.0385429	0.0244305	11	5.22375	R
XLOC_007263	Bra032009	dM1	0.00606981	0.00294312	11	4.83824	wM1	0.0385429	0.0244305	10	2.94525	R
XLOC_008990	Bra021958	dM1	7.05e-07	1.7e-08	10	2.05291	wM1	0.0447399	0.0289726	8	2.03745	R
XLOC_044516	Bra009333	dM1	0.000164103	3.84e-05	10	31.6056	wM1	0.0447399	0.0289726	12	27.3261	R
XLOC_002776	Bra011168	dM1	0.000820427	0.000275495	8	2.88005	wM1	0.0447399	0.0289726	8	2.33658	R
XLOC_034519	Bra021037	dM1	0.00124721	0.000459966	8	6.70309	wM3	0.0447399	0.0289726	6	21.9941	R
XLOC_022523	Bra034408	dM1	0.00188574	0.000752483	6	1.88281	wM5	0.0447399	0.0289726	8	0.773716	R
XLOC_021452	Bra039174_Bra039175	dM1	0.00230246	0.000955433	10	6.03912	wM1	0.0447399	0.0289726	8	4.80974	R
XLOC_021943	Bra005305	dM1	0.00230246	0.000955433	10	129.921	wM14	0.0447399	0.0289726	10	123.202	R
XLOC_004317	Bra021262	dM1	0.00280851	0.00120739	10	2.6342	wM1	0.0447399	0.0289726	12	0.40694	R
XLOC_035835	Bra036247	dM1	0.003423	0.00151876	10	3.1003	wM1	0.0447399	0.0289726	10	0.101654	R
XLOC_001123	Bra036865	dM1	0.00417337	0.00190181	12	3.02642	wM1	0.0447399	0.0289726	12	2.51985	R
XLOC_019583	Bra004726	dM1	0.00503389	0.00237097	10	2.69138	wM1	0.0447399	0.0289726	8	2.69827	R
XLOC_026285	Bra019651	dM1	0.00503389	0.00237097	8	0.9104	wM5	0.0447399	0.0289726	8	3.63729	R
XLOC_024361	Bra025804	dM1	0.00606981	0.00294312	9	38.4923	wM1	0.0447399	0.0289726	10	17.8606	R
XLOC_038060	Bra007063	dM1	0.00968223	0.00498408	8	2.82601	wM1	0.048796	0.0316081	10	0.118702	R
XLOC_007733	Bra023416	dM1	0.000526591	0.000161509	10	2.11452	wM1	0.0519391	0.0342436	8	0.272066	R
XLOC_038742	Bra031158	dM1	0.00101527	0.000356905	10	2.21982	wM1	0.0519391	0.0342436	10	1.73856	R
XLOC_046464	Bra035335	dM1	0.00188574	0.000752483	10	4.29108	wM1	0.0519391	0.0342436	13	1.01555	R
XLOC_038568	Bra007763	dM1	0.00280851	0.00120739	6	2.44532	wM5	0.0519391	0.0342436	6	3.05357	R
XLOC_006940	Bra020751	dM1	0.00606981	0.00294312	10	1.12303	wM1	0.0519391	0.0342436	13	1.05529	R
XLOC_016506	Bra033465	dM1	0.00606981	0.00294312	6	1.12501	wM11	0.0519391	0.0342436	6	1.61355	R
XLOC_022014	Bra005432	dM1	0.00725001	0.0036379	11	1.26487	wM1	0.0519391	0.0342436	12	2.50776	R
XLOC_044046	Bra002038	dM1	0.00725001	0.0036379	11	4.05405	wM1	0.0519391	0.0342436	8	1.69607	R
XLOC_007457	Bra028511	dM1	0.00280851	0.00120739	10	1.75546	wM1	0.0601243	0.0403398	12	1.54322	R
XLOC_045795	Bra008770	dM1	0.00417337	0.00190181	8	0.637358	wM1	0.0601243	0.0403398	8	2.65816	R
XLOC_023092	Bra027332_Bra027334	dM1	0.00725001	0.0036379	12	0.800996	wM1	0.0601243	0.0403398	10	0.978813	R
XLOC_000493	Bra013326	dM1	6.13e-05	1.08e-05	10	3.48884	wM1	0.0693755	0.0473666	11	3.94036	R
XLOC_026658	Bra018028	dM1	0.00101527	0.000356905	6	15.1145	wM3	0.0693755	0.0473666	4	5.84834	R
XLOC_038632	Bra039236	dM1	0.00124721	0.000459966	11	7.38089	wM11	0.0693755	0.0473666	10	11.5852	R
XLOC_016994	Bra032032	dM1	0.003423	0.00151876	10	63.9932	wM14	0.0693755	0.0473666	10	76.4856	R
XLOC_018557	Bra032150	dM1	0.00417337	0.00190181	10	4.96885	wM1	0.0693755	0.0473666	12	1.16753	R
XLOC_014720	Bra001253	dM1	0.00725001	0.0036379	9	14.1095	wM1	0.0693755	0.0473666	8	18.2395	R
XLOC_031155	Bra003779	dM1	0.00725001	0.0036379	8	3.50405	wM1	0.0693755	0.0473666	10	2.19455	R
XLOC_021553	Bra004519	dM1	0.00870082	0.00447811	6	3.81355	wM3	0.0693755	0.0473666	7	0.470728	R
XLOC_047461	Bra040752	dM1	0.00870082	0.00447811	8	2.60788	wM3	0.0693755	0.0473666	6	3.63495	R
XLOC_039435	Bra032664_Bra032665_Bra032666	dM1	4.77e-05	7.75e-06	10	0.54822	wM1	0.0800484	0.0554394	10	2.03746	R
XLOC_021483	Bra039109	dM1	0.000421201	0.000122629	10	3.25778	wM1	0.0800484	0.0554394	10	1.42355	R
XLOC_036272	Bra037278	dM1	0.00124721	0.000459966	12	0.90994	wM11	0.0800484	0.0554394	12	2.94513	R
XLOC_028266	Bra015038	dM1	0.00153479	0.000589779	10	1.68086	wM1	0.0800484	0.0554394	10	0	R
XLOC_032954	Bra010347_Bra010348	dM1	0.00188574	0.000752483	10	2.15795	wM1	0.0800484	0.0554394	12	2.03816	R
XLOC_039438	Bra032670	dM1	0.00725001	0.0036379	10	13.5932	wM1	0.0800484	0.0554394	9	13.2973	R
XLOC_024035	Bra019733	dM1	0.003423	0.00151876	10	2.8577	wM1	0.0918294	0.0646837	9	2.16884	R
XLOC_025930	Bra018855	dM1	0.00417337	0.00190181	10	2.75343	wM1	0.0918294	0.0646837	10	2.61487	R
XLOC_044698	Bra037948	dM1	0.00417337	0.00190181	11	1.46601	wM1	0.0918294	0.0646837	12	0.25173	R
XLOC_045608	Bra002058	dM1	0.000164103	3.84e-05	6	1.94271	wM1	0.10502	0.0752356	8	0	R
XLOC_031754	Bra015839	dM1	0.000820427	0.000275495	10	2.23467	wM1	0.10502	0.0752356	10	0.6726	R
XLOC_044667	Bra009620_Bra009621	dM1	0.00280851	0.00120739	8	4.14563	wM5	0.10502	0.0752356	6	9.84904	R
XLOC_000795	Bra013899	dM1	0.00417337	0.00190181	8	2.22258	wM1	0.10502	0.0752356	10	0.667933	R
XLOC_042922	Bra032526_Bra032537_tRNA-Gly	dM1	0.00417337	0.00190181	8	8.82024	wM11	0.10502	0.0752356	6	2.54021	R
XLOC_013206	Bra006056	dM1	0.00606981	0.00294312	10	31.4455	wM1	0.10502	0.0752356	10	51.3862	R
XLOC_015943	Bra023952	dM1	0.00725001	0.0036379	8	3.05095	wM5	0.10502	0.0752356	8	1.63851	R
XLOC_043580	Bra002842	dM1	0.00725001	0.0036379	8	3.68685	wM3	0.10502	0.0752356	6	0	R
XLOC_031973	Bra035154	dM1	0.000164103	3.84e-05	12	3.38946	wM14	0.120193	0.0872416	12	0.451367	R
XLOC_022849	Bra022366	dM1	0.000820427	0.000275495	10	1.0605	wM1	0.120193	0.0872416	12	1.40361	R
XLOC_016941	Bra032124	dM1	0.00725001	0.0036379	12	20.0741	wM1	0.120193	0.0872416	12	5.9503	R
XLOC_042677	Bra026970	dM1	0.00725001	0.0036379	8	2.10079	wM5	0.120193	0.0872416	8	1.08422	R
XLOC_030109	Bra015169	dM1	0.00188574	0.000752483	8	0.857296	wM1	0.136948	0.100859	10	0	R
XLOC_011096	Bra000532	dM1	0.00503389	0.00237097	10	2.42969	wM1	0.136948	0.100859	12	2.42976	R
XLOC_008922	Bra033119	dM1	0.00280851	0.00120739	8	4.08743	wM3	0.155156	0.116257	1	3.83407	R
XLOC_010424	Bra006835	dM1	0.00503389	0.00237097	8	27.4612	wM5	0.155156	0.116257	6	0	R
XLOC_027879	Bra025042_Bra025043	dM1	0.00870082	0.00447811	8	2.17911	wM1	0.155156	0.116257	10	1.04764	R
XLOC_022275	Bra018486	dM1	0.00101527	0.000356905	10	4.39446	wM11	0.175784	0.133615	12	4.26124	R
XLOC_024225	Bra026001	dM1	0.00230246	0.000955433	6	3.38994	wM5	0.175784	0.133615	8	1.67174	R
XLOC_026085	Bra018575	dM1	0.00870082	0.00447811	8	14.8458	wM11	0.175784	0.133615	6	16.4729	R
XLOC_005069	Bra028612	dM1	0.000421201	0.000122629	10	2.21225	wM1	0.198669	0.153123	10	1.37553	R
XLOC_009637	Bra029272	dM1	0.00725001	0.0036379	8	3.53285	wM3	0.198669	0.153123	6	4.23126	R
XLOC_032138	Bra014320	dM1	0.00124721	0.000459966	8	16.539	wM5	0.252664	0.199403	7	3.6999	R
XLOC_008723	Bra008213_Bra008214	dM1	0.00280851	0.00120739	9	10.761	wM1	0.252664	0.199403	9	5.12221	R
XLOC_000841	Bra026505	dM1	0.00417337	0.00190181	8	1.92898	wM1	0.252664	0.199403	10	1.83337	R
XLOC_007067	Bra020536	dM1	0.00503389	0.00237097	8	10.6282	wM1	0.252664	0.199403	8	3.19584	R
XLOC_003561	Bra036922	dM1	0.00606981	0.00294312	10	2.32532	wM5	0.252664	0.199403	8	0.834952	R
XLOC_034633	Bra020855_tRNA-Tyr	dM1	0.000100996	2.07e-05	10	13.7174	wM1	0.284122	0.226605	11	7.85613	R
XLOC_012827	Bra017632	dM1	0.00503389	0.00237097	10	1.97361	wM1	0.284122	0.226605	9	2.35735	R
XLOC_027513	Bra037443	dM1	0.00606981	0.00294312	6	1.39491	wM5	0.284122	0.226605	8	0.862529	R
XLOC_021507	Bra004445	dM1	0.000658514	0.000211519	10	6.95242	wM1	0.318627	0.256819	10	4.36221	R
XLOC_020186	Bra018379	dM1	0.00870082	0.00447811	8	1.24027	wM1	0.318627	0.256819	12	2.0784	R
XLOC_029887	Bra035098	dM1	0.00870082	0.00447811	8	0.790545	wM3	0.318627	0.256819	5	0	R
XLOC_044207	Bra008770	dM1	0.00870082	0.00447811	8	1.31359	wM1	0.318627	0.256819	10	0.669913	R
XLOC_027396	Bra010108_Bra010109_Bra010110	dM1	0.000658514	0.000211519	8	0.924542	wM1	0.355768	0.290281	8	1.04998	R
XLOC_032984	Bra010398	dM1	0.00606981	0.00294312	12	1.01456	wM1	0.355768	0.290281	12	0.390676	R
XLOC_029907	Bra035140_Bra035141	dM1	0.000100996	2.07e-05	8	1.7578	wM1	0.396903	0.327235	10	1.31692	R
XLOC_003033	Bra013511	dM1	0.00503389	0.00237097	10	3.1083	wM14	0.396903	0.327235	12	2.80043	R
XLOC_043453	Bra003055	dM1	0.00503389	0.00237097	8	6.13863	wM1	0.396903	0.327235	10	14.1459	R
XLOC_016804	Bra025452_Bra025453_Bra025454	dM1	0.00606981	0.00294312	10	1.53004	wM1	0.396903	0.327235	10	2.5e-15	R
XLOC_002478	Bra011709	dM1	0.00725001	0.0036379	10	7.10911	wM1	0.396903	0.327235	14	3.68431	R
XLOC_029213	Bra003847	dM1	0.00101527	0.000356905	8	1.82284	wM1	0.441589	0.36793	8	0.413233	R
XLOC_046409	Bra035009	dM1	0.00188574	0.000752483	6	0.710239	wM5	0.441589	0.36793	8	0	R
XLOC_002544	Bra011574	dM1	0.00503389	0.00237097	8	3.03992	wM1	0.441589	0.36793	14	1.25e-15	R
XLOC_024762	Bra024240	dM1	0.00725001	0.0036379	8	1.35816	wM1	0.490306	0.412622	12	0.197905	R
XLOC_039735	Bra036123	dM1	0.000820427	0.000275495	8	2.73686	wM3	0.542604	0.461566	6	0.0109602	R
XLOC_007514	Bra028615	dM1	0.00503389	0.00237097	10	12.8462	wM1	0.542604	0.461566	11	12.1878	R
XLOC_027288	Bra009908	dM1	4.77e-05	7.75e-06	10	3.20554	wM1	0.660684	0.573241	12	2.0309	R
XLOC_024330	Bra025763	dM1	0.003423	0.00151876	10	8.66496	wM5	0.660684	0.573241	8	8.69063	R
XLOC_034729	Bra034577_Bra034578_Bra034579	dM1	0.00503389	0.00237097	12	0.846124	wM1	0.660684	0.573241	12	0	R
XLOC_010587	Bra022751_Bra022752	dM1	0.00188574	0.000752483	12	17.3793	wM1	0.727477	0.636484	6	21.1064	R
XLOC_045176	Bra002854	dM1	0.000333867	9.26e-05	10	1.87315	wM1	0.95537	0.858799	8	1.26e-15	R
XLOC_011987	Bra013125	dM1	0.00101527	0.000356905	8	1.18105	wM1	1	1	NA	0.388859	R
XLOC_036361	Bra036717_Bra036718	dM1	0.00280851	0.00120739	8	3.95053	wM14	1	1	NA	0	R
XLOC_033921	Bra030883	dM1	0.00417337	0.00190181	6	1.58413	wM4	1	1	NA	0.432349	R
XLOC_021598	Bra004587	dM1	0.00503389	0.00237097	10	2.8198	wM1	1	1	NA	0.241972	R
XLOC_016871	Bra030260	dM1	0.00678502	0.00329051	6	2.79314	wM9	1	1	NA	2.37961	R
XLOC_046216	Bra009583	dM10	0.00124721	0.000459966	6	69.8911	wM11	0.00015476	3.84e-05	6	123.776	A
XLOC_021848	Bra005099	dM10	0.00101527	0.000356905	8	262.569	wM5	0.00015476	3.84e-05	6	286.028	A
XLOC_006581	Bra022002	dM10	0.003423	0.00151876	8	35.6678	wM5	9.34e-05	2.07e-05	6	23.5272	A
XLOC_016684	Bra025662_Bra025663	dM10	0.000333867	9.26e-05	6	59.7075	wM3	7.32e-05	1.5e-05	5	47.0027	A
XLOC_024184	Bra026058	dM10	0.00503389	0.00237097	8	45.5487	wM11	0.00278927	0.00120739	6	25.5702	A
XLOC_021552	Bra004518	dM10	0.00606981	0.00294312	8	35.7895	wM11	0.00726063	0.0036379	6	12.8238	A
XLOC_032516	Bra038952	dM10	7.89e-05	1.5e-05	8	92.5021	wM5	2.54e-05	3.88e-06	8	63.9133	A
XLOC_009585	Bra029355	dM10	0.00153479	0.000589779	8	63.5714	wM11	0.00499771	0.00237097	6	22.8345	A
XLOC_017195	Bra021674	dM10	0.00188574	0.000752483	8	245.315	wM11	0.00150923	0.000589779	8	197.197	A
XLOC_018673	Bra034309	dM10	0.00280851	0.00120739	6	8.46181	wM11	0.0103934	0.00549005	8	11.0147	R
XLOC_011232	Bra000760	dM10	0.00870082	0.00447811	8	25.007	wM11	0.0124242	0.00670393	7	21.4532	R
XLOC_023606	Bra039679	dM10	0.003423	0.00151876	6	6.82231	wM11	0.0147373	0.00815436	8	15.814	R
XLOC_010626	Bra022815	dM10	0.00606981	0.00294312	8	247.585	wM11	0.0147373	0.00815436	8	219.434	R
XLOC_026603	Bra017914	dM10	0.00725001	0.0036379	10	31.7637	wM11	0.0241241	0.0143459	8	20.8554	R
XLOC_000260	Bra011412	dM10	0.00280851	0.00120739	6	2.08349	wM11	0.0329852	0.0205299	8	3.63007	R
XLOC_015178	Bra013154	dM10	0.00870082	0.00447811	10	2.65721	wM1	0.0447399	0.0289726	12	0	R
XLOC_017775	Bra040433	dM11	0.000207844	5.18e-05	18	290.027	wM2	0.00602704	0.00294312	20	337.601	A
XLOC_042455	Bra031017	dM11	0.000658514	0.000211519	16	13.0032	wM12	4.35e-05	7.75e-06	16	30.6824	A
XLOC_010307	Bra006586	dM11	0.00280851	0.00120739	17	10.9638	wM7	0.0018569	0.000752483	18	27.4855	A
XLOC_038734	Bra031165_Bra031167	dM11	0.00124721	0.000459966	18	23.4052	wM2	0.00122491	0.000459966	20	1.63483	A
XLOC_002412	Bra011839	dM11	0.000207844	5.18e-05	18	66.4737	wM7	0.00040536	0.000122629	18	43.0833	A
XLOC_016579	Bra032695	dM11	0.00725001	0.0036379	18	1.52968	wM7	0.0147373	0.00815436	18	7.55296	R
XLOC_002584	Bra011514	dM11	0.00870082	0.00447811	18	0.769297	wM10	0.0147373	0.00815436	18	0.121933	R
XLOC_042338	Bra031183_Bra031184	dM11	0.00870082	0.00447811	18	4.39693	wM13	0.0147373	0.00815436	18	5.60545	R
XLOC_012335	Bra038805	dM11	0.000526591	0.000161509	16	65.0284	wM8	0.0173944	0.00988072	18	20.422	R
XLOC_036903	Bra032807_Bra032808	dM11	0.000164103	3.84e-05	18	6.11075	wM13	0.0329852	0.0205299	22	3.42975	R
XLOC_010224	Bra006425	dM11	0.000263727	6.95e-05	16	40.2344	wM10	0.0329852	0.0205299	20	56.6562	R
XLOC_028760	Bra011985	dM11	0.00188574	0.000752483	16	49.4741	wM8	0.0385429	0.0244305	18	20.2416	R
XLOC_005447	Bra023644	dM11	0.00417337	0.00190181	14	8.94709	wM7	0.0385429	0.0244305	16	10.7174	R
XLOC_010140	Bra006272_Bra006329	dM11	0.00417337	0.00190181	16	30.8058	wM13	0.0385429	0.0244305	18	7.01733	R
XLOC_003208	Bra013832	dM11	0.00124721	0.000459966	16	42.6598	wM8	0.0447399	0.0289726	16	12.6077	R
XLOC_021724	Bra004853	dM11	0.00230246	0.000955433	17	13.2908	wM13	0.0519391	0.0342436	18	27.8162	R
XLOC_027619	Bra025280	dM11	0.00280851	0.00120739	18	6.37662	wM10	0.0519391	0.0342436	20	0.191697	R
XLOC_026630	Bra017964	dM11	0.00725001	0.0036379	18	1.04129	wM8	0.0693755	0.0473666	19	0.177837	R
XLOC_034736	Bra034566_Bra034569	dM11	0.000333867	9.26e-05	18	8.11165	wM8	0.0918294	0.0646837	18	9.87757	R
XLOC_014891	Bra001535	dM11	0.003423	0.00151876	18	6.67219	wM13	0.0918294	0.0646837	18	3.91956	R
XLOC_011450	Bra001129_Bra001158_Bra001159_U1	dM11	0.00101527	0.000356905	14	77.2953	wM12	0.120193	0.0872416	16	94.4044	R
XLOC_039423	Bra032646	dM11	0.00606981	0.00294312	18	4.45689	wM10	0.120193	0.0872416	20	2.21664	R
XLOC_022325	Bra039494	dM11	0.00417337	0.00190181	16	3.25983	wM1	0.155156	0.116257	14	3.59896	R
XLOC_035571	Bra016736	dM11	0.00503389	0.00237097	16	16.0691	wM8	0.155156	0.116257	18	10.4393	R
XLOC_045459	Bra002326	dM11	0.00280851	0.00120739	16	29.1363	wM8	0.284122	0.226605	16	25.0719	R
XLOC_009765	Bra031892	dM11	0.00153479	0.000589779	16	19.7707	wM6	0.318627	0.256819	17	5.88171	R
XLOC_005533	Bra020124	dM11	0.00188574	0.000752483	16	60.7405	wM8	0.318627	0.256819	16	20.907	R
XLOC_018652	Bra034274	dM11	0.00230246	0.000955433	18	5.41283	wM7	0.490306	0.412622	17	7.69184	R
XLOC_007348	Bra031869	dM11	0.00725001	0.0036379	16	18.8996	wM13	0.660684	0.573241	18	10.0289	R
XLOC_028140	Bra039631	dM12	6.13e-05	1.08e-05	19	33.6357	wM2	0.000253031	6.95e-05	20	74.6843	A
XLOC_003202	Bra013826	dM12	0.00870082	0.00447811	22	15.0709	wM2	0.00868696	0.00447811	21	39.7421	A
XLOC_026736	Bra018149	dM12	0.000207844	5.18e-05	20	50.3432	wM2	0.000322366	9.26e-05	20	68.5959	A
XLOC_020933	Bra022185_Bra022186	dM12	3.15e-06	1.71e-07	20	16.7615	wM2	0.000511887	0.000161509	20	32.6524	A
XLOC_029568	Bra016173	dM12	0.000421201	0.000122629	22	13.4634	wM2	0.00122491	0.000459966	22	23.7945	A
XLOC_020136	Bra018280	dM12	0.00153479	0.000589779	20	37.8406	wM2	0.00122491	0.000459966	20	27.5755	A
XLOC_044890	Bra015225	dM12	7.89e-05	1.5e-05	20	32.3705	wM2	1.11e-05	1.29e-06	20	21.3901	A
XLOC_011753	Bra001671	dM12	0.00280851	0.00120739	22	44.9836	wM2	0.00040536	0.000122629	22	31.244	A
XLOC_032779	Bra034674	dM12	0.00124721	0.000459966	21	94.6609	wM2	0.000253031	6.95e-05	20	77.0158	A
XLOC_014014	Bra023102	dM12	0.000526591	0.000161509	21	99.4186	wM2	0.00015476	3.84e-05	22	53.9097	A
XLOC_044955	Bra033345	dM12	0.000820427	0.000275495	20	3.75039	wM10	0.0103934	0.00549005	20	2.17372	R
XLOC_045271	Bra002684_Bra002685_Bra002686	dM12	0.00870082	0.00447811	20	11.8106	wM2	0.0103934	0.00549005	20	22.5901	R
XLOC_046201	Bra009556	dM12	0.00606981	0.00294312	21	4.25985	wM2	0.0124242	0.00670393	21	5.65844	R
XLOC_033990	Bra014331	dM12	0.00503389	0.00237097	20	7.41147	wM2	0.0241241	0.0143459	18	3.92932	R
XLOC_006220	Bra008136	dM12	0.00503389	0.00237097	22	1.89398	wM2	0.0282411	0.0171921	22	1.73829	R
XLOC_032613	Bra021061_Bra021062	dM12	0.003423	0.00151876	20	2.97997	wM2	0.0519391	0.0342436	21	2.23901	R
XLOC_000510	Bra013361	dM12	0.00870082	0.00447811	22	2.72786	wM2	0.224226	0.174982	0	1.93393	R
XLOC_031073	Bra003649	dM13	0.000263727	6.95e-05	8	18.7518	wM5	0.0033966	0.00151876	8	3.65793	A
XLOC_022319	Bra039488	dM13	0.003423	0.00151876	8	54.5257	wM5	0.0329852	0.0205299	7	9.62549	R
XLOC_010921	Bra000227	dM14	0.00870082	0.00447811	9	79.1056	wM1	0.00228097	0.000955433	10	50.8449	A
XLOC_007284	Bra031967	dM14	0.00725001	0.0036379	10	5.1854	wM1	0.0173944	0.00988072	10	3.06881	R
XLOC_047683	Bra040962	dM14	0.00188574	0.000752483	14	9.4258	wM12	0.0693755	0.0473666	16	3.13779	R
XLOC_012266	Bra012632	dM14	0.00417337	0.00190181	18	6.64405	wM12	0.10502	0.0752356	16	7.79841	R
XLOC_012350	Bra038783	dM14	0.00417337	0.00190181	16	3.71797	wM12	0.10502	0.0752356	14	1.92824	R
XLOC_006233	Bra008163	dM15	0.000263727	6.95e-05	20	320.437	wM2	2.54e-05	3.88e-06	20	513.533	A
XLOC_033142	Bra010643_Bra010644	dM15	0.003423	0.00151876	0	0	wM2	4.35e-05	7.75e-06	0	143.236	A
XLOC_028678	Bra012153	dM15	0.00503389	0.00237097	18	20.603	wM2	0.000640495	0.000211519	22	72.4473	A
XLOC_034362	Bra035518_Bra035529	dM15	0.00503389	0.00237097	22	263.577	wM6	0.00499771	0.00237097	22	298.944	A
XLOC_015258	Bra013017_Bra013018	dM15	0.00606981	0.00294312	23	60.8243	wM13	5.62e-05	1.08e-05	0	87.5327	A
XLOC_027439	Bra010167	dM15	6.13e-05	1.08e-05	18	25.0033	wM2	4.35e-05	7.75e-06	20	46.7327	A
XLOC_033871	Bra030512_Bra030513_Bra030514	dM15	0.000421201	0.000122629	0	26.4951	wM6	0.000511887	0.000161509	22	16.1515	A
XLOC_002361	Bra040520	dM15	0.000164103	3.84e-05	18	582.663	wM2	5.62e-05	1.08e-05	20	549.415	A
XLOC_016401	Bra014755	dM15	0.000333867	9.26e-05	20	46.1366	wM6	0.0103934	0.00549005	22	38.4984	R
XLOC_014559	Bra000952_Bra000953	dM15	0.00503389	0.00237097	18	11.6308	wM13	0.0147373	0.00815436	22	22.7031	R
XLOC_035891	Bra037380	dM15	0.00188574	0.000752483	22	81.8618	wM2	0.0447399	0.0289726	0	196.611	R
XLOC_003225	Bra013863	dM15	0.00188574	0.000752483	0	193.966	wM2	0.175784	0.133615	20	239.615	R
XLOC_036477	Bra027707	dM17	0.00230246	0.000955433	18	43.2608	wM2	0.0147373	0.00815436	20	91.3261	R
XLOC_044975	Bra033316	dM17	0.00503389	0.00237097	20	5.43843	wM2	0.0173944	0.00988072	18	2.83734	R
XLOC_024654	Bra019539	dM17	0.00280851	0.00120739	20	1.99348	wM2	0.0204803	0.0119277	20	3.42678	R
XLOC_010936	Bra000256	dM17	0.00153479	0.000589779	18	7.67501	wM2	0.0329852	0.0205299	18	8.16864	R
XLOC_017524	Bra017038	dM17	0.00153479	0.000589779	18	4.14697	wM7	0.0329852	0.0205299	16	2.11078	R
XLOC_015765	Bra019088	dM17	0.00417337	0.00190181	18	21.0039	wM9	0.0800484	0.0554394	20	29.6455	R
XLOC_012263	Bra012635	dM17	0.00606981	0.00294312	19	3.99607	wM10	0.0918294	0.0646837	19	6.27267	R
XLOC_034066	Bra014190	dM17	0.00725001	0.0036379	18	3.99862	wM10	0.136948	0.100859	16	6.29763	R
XLOC_000207	Bra011505	dM17	0.00870082	0.00447811	18	73.5037	wM10	0.284122	0.226605	18	56.4483	R
XLOC_014849	Bra001470	dM17	0.00725001	0.0036379	18	21.8277	wM9	0.396903	0.327235	22	0.497096	R
XLOC_009614	Bra029307_Bra029308	dM19	0.00725001	0.0036379	6	0	wM11	0.0173944	0.00988072	7	2.83194	R
XLOC_029830	Bra015665	dM19	0.00870082	0.00447811	6	0	wM11	0.136948	0.100859	8	24.3082	R
XLOC_042117	Bra007688	dM19	0.00870082	0.00447811	6	1.10125	wM3	0.798814	0.704998	8	2.48718	R
XLOC_024552	Bra018170	dM2	7.33e-06	5.92e-07	22	116.724	wM6	0.000322366	9.26e-05	22	233.605	A
XLOC_019712	Bra004950	dM2	1.66e-05	1.88e-06	22	183.773	wM4	1.94e-05	2.71e-06	0	264.85	A
XLOC_034367	Bra035516	dM2	1.29e-06	4.44e-08	22	392.567	wM2	6.46e-06	5.92e-07	22	471.78	A
XLOC_000599	Bra013517	dM2	0.00417337	0.00190181	22	145.054	wM6	0.000322366	9.26e-05	22	223.619	A
XLOC_011364	Bra000974	dM2	5.45e-06	3.95e-07	22	54.426	wM4	2.07e-06	1.1e-07	0	130.109	A
XLOC_018771	Bra035669	dM2	0.00101527	0.000356905	0	37.3748	wM6	9.34e-05	2.07e-05	0	111.214	A
XLOC_023868	Bra018565_Bra020030	dM2	0.00417337	0.00190181	22	98.1337	wM9	0.00150923	0.000589779	22	170.662	A
XLOC_014100	Bra000144	dM2	1.05e-08	2.52e-11	0	898.823	wM2	4.38e-08	1.91e-10	0	966.995	A
XLOC_021594	Bra004581	dM2	3.66e-05	5.5e-06	22	109.322	wM2	0.00150923	0.000589779	22	166.223	A
XLOC_029432	Bra004275	dM2	3.15e-06	1.71e-07	20	242.791	wM2	2.56e-07	3.6e-09	20	285.291	A
XLOC_035538	Bra016683	dM2	0.000100996	2.07e-05	22	33.1994	wM2	8.51e-06	8.78e-07	22	71.3455	A
XLOC_024204	Bra026028_Bra026029	dM2	7.33e-06	5.92e-07	0	252.373	wM2	2.07e-06	1.1e-07	0	284.52	A
XLOC_047446	Bra040738	dM2	2.85e-05	3.88e-06	20	78.4203	wM2	1.11e-05	1.29e-06	20	109.496	A
XLOC_045815	Bra008811	dM2	0.00417337	0.00190181	20	29.9127	wM2	0.0033966	0.00151876	20	60.22	A
XLOC_016030	Bra017693	dM2	0.000100996	2.07e-05	20	150.658	wM2	1.94e-05	2.71e-06	20	177.543	A
XLOC_031872	Bra015656_tRNA-Gly	dM2	9.57e-07	2.77e-08	20	91.0731	wM2	1.93e-08	5.08e-11	22	117.852	A
XLOC_035508	Bra016627_Bra016628_Bra016629_Bra016630	dM2	9.57e-07	2.77e-08	20	56.4851	wM2	5.01e-07	1.03e-08	20	81.6708	A
XLOC_041831	Bra007235	dM2	9.57e-07	2.77e-08	0	63.9464	wM3	4.38e-08	1.91e-10	0	88.2523	A
XLOC_032134	Bra014324	dM2	0.000263727	6.95e-05	21	20.7931	wM2	0.000322366	9.26e-05	22	44.8857	A
XLOC_025550	Bra024934_Bra024935	dM2	7.05e-07	1.7e-08	0	78.7798	wM2	2.07e-06	1.1e-07	0	99.9958	A
XLOC_025451	Bra024776_Bra024777	dM2	0.000820427	0.000275495	0	6.76348	wM4	0.0033966	0.00151876	0	27.6528	A
XLOC_025764	Bra033578	dM2	1.75e-06	7.04e-08	22	18.8865	wM2	2.73e-06	1.71e-07	22	38.5172	A
XLOC_047679	Bra040959	dM2	3.66e-05	5.5e-06	22	31.3673	wM2	0.00602704	0.00294312	22	49.9161	A
XLOC_043023	Bra037953	dM2	9.63e-06	8.78e-07	21	38.664	wM2	1.47e-05	1.88e-06	20	56.5102	A
XLOC_036120	Bra035839_Bra035875_Bra035883	dM2	1.75e-06	7.04e-08	20	64.7187	wM2	1.11e-05	1.29e-06	22	82.3638	A
XLOC_018154	Bra032727	dM2	0.000820427	0.000275495	18	11.7571	wM2	2.54e-05	3.88e-06	22	29.1788	A
XLOC_043706	Bra002617	dM2	0.00124721	0.000459966	22	39.8681	wM6	0.00228097	0.000955433	22	56.9327	A
XLOC_021815	Bra005037	dM2	0.000333867	9.26e-05	20	60.5439	wM2	0.000987752	0.000356905	20	77.3907	A
XLOC_030147	Bra015132	dM2	3.15e-06	1.71e-07	22	34.7916	wM2	1.11e-05	1.29e-06	22	51.1603	A
XLOC_011672	Bra001550	dM2	0.000526591	0.000161509	20	57.5847	wM2	0.000253031	6.95e-05	20	73.8969	A
XLOC_015794	Bra019026	dM2	7.89e-05	1.5e-05	21	43.2339	wM2	2.54e-05	3.88e-06	22	59.1346	A
XLOC_035519	Bra016649	dM2	0.000263727	6.95e-05	0	35.5399	wM2	0.00122491	0.000459966	0	51.1365	A
XLOC_031129	Bra003735	dM2	0.00153479	0.000589779	0	23.2334	wM6	0.000640495	0.000211519	0	38.5119	A
XLOC_033772	Bra030682	dM2	1.24e-07	1.18e-09	0	87.4995	wM2	5.18e-09	5.65e-12	0	102.73	A
XLOC_003253	Bra013912	dM2	5.45e-06	3.95e-07	22	38.0077	wM4	1.11e-05	1.29e-06	0	52.8128	A
XLOC_046887	Bra039342	dM2	0.00153479	0.000589779	22	43.7006	wM2	9.34e-05	2.07e-05	22	58.3964	A
XLOC_020390	Bra030380	dM2	0.000526591	0.000161509	0	15.2728	wM9	0.00150923	0.000589779	0	28.5318	A
XLOC_018321	Bra025590	dM2	0.00725001	0.0036379	0	5.11e-15	wM4	0.00150923	0.000589779	0	13.0871	A
XLOC_011383	Bra001007	dM2	1.27e-05	1.29e-06	20	20.4665	wM9	3.32e-05	5.5e-06	22	32.5118	A
XLOC_008473	Bra038361	dM2	5.45e-06	3.95e-07	22	54.3181	wM2	4.86e-06	3.95e-07	0	65.2937	A
XLOC_007336	Bra031888	dM2	0.00153479	0.000589779	0	2.0598	wM3	0.00228097	0.000955433	0	12.7029	A
XLOC_029304	Bra004024	dM2	1.29e-06	4.44e-08	0	17.7571	wM2	1.94e-05	2.71e-06	0	28.3544	A
XLOC_002722	Bra011268	dM2	9.63e-06	8.78e-07	0	76.7437	wM2	6.46e-06	5.92e-07	0	66.6936	A
XLOC_012912	Bra017781	dM2	0.00606981	0.00294312	20	22.0132	wM2	1.94e-05	2.71e-06	20	11.7897	A
XLOC_024316	Bra025733	dM2	7.05e-07	1.7e-08	20	25.3149	wM2	9.06e-07	2.77e-08	20	15.0098	A
XLOC_005382	Bra023527	dM2	6.1e-08	3.58e-10	22	34.7266	wM2	1.47e-05	1.88e-06	22	24.1521	A
XLOC_022294	Bra018529	dM2	6.13e-05	1.08e-05	20	29.2508	wM10	5.62e-05	1.08e-05	20	18.4282	A
XLOC_007985	Bra020169	dM2	0.000207844	5.18e-05	22	30.8628	wM4	0.000640495	0.000211519	0	19.8588	A
XLOC_017753	Bra039270	dM2	0.000421201	0.000122629	22	24.8023	wM2	0.00150923	0.000589779	22	13.6284	A
XLOC_010382	Bra006755_Bra006756	dM2	5.45e-06	3.95e-07	20	76.9879	wM2	1.11e-05	1.29e-06	22	65.2126	A
XLOC_005399	Bra023549	dM2	0.000207844	5.18e-05	22	58.688	wM2	0.000120338	2.83e-05	0	46.6199	A
XLOC_021975	Bra005356	dM2	0.000129226	2.83e-05	0	38.2516	wM4	0.00150923	0.000589779	0	26.0161	A
XLOC_024265	Bra025926	dM2	4.07e-06	2.61e-07	0	43.0921	wM4	4.86e-06	3.95e-07	0	30.841	A
XLOC_008111	Bra020388	dM2	1.75e-06	7.04e-08	20	55.8125	wM2	3.67e-06	2.61e-07	22	42.0982	A
XLOC_013608	Bra006770	dM2	2.17e-05	2.71e-06	22	22.3967	wM2	1.47e-05	1.88e-06	22	7.74317	A
XLOC_029533	Bra016238	dM2	0.000333867	9.26e-05	20	124.178	wM2	0.000322366	9.26e-05	20	109.065	A
XLOC_027546	Bra025406	dM2	0.000129226	2.83e-05	22	28.795	wM2	1.2e-06	4.44e-08	22	13.2457	A
XLOC_019182	Bra017055	dM2	7.89e-05	1.5e-05	22	481.999	wM2	7.32e-05	1.5e-05	23	466.323	A
XLOC_031327	Bra004055_Bra004056	dM2	6.1e-08	3.58e-10	20	96.7534	wM2	4.38e-08	1.91e-10	20	80.8075	A
XLOC_024987	Bra009805	dM2	1.29e-06	4.44e-08	22	61.3867	wM2	1.47e-05	1.88e-06	23	44.2765	A
XLOC_000315	Bra011293	dM2	7.89e-05	1.5e-05	22	42.9849	wM2	0.0018569	0.000752483	22	24.84	A
XLOC_007195	Bra029292_Bra029293	dM2	6.13e-05	1.08e-05	20	33.9177	wM2	5.62e-05	1.08e-05	20	14.4363	A
XLOC_009762	Bra031898	dM2	8.39e-08	6.57e-10	22	159.712	wM2	8.51e-06	8.78e-07	23	137.239	A
XLOC_025758	Bra033588_Bra033589	dM2	5.45e-06	3.95e-07	0	355.661	wM3	1.47e-05	1.88e-06	0	332.319	A
XLOC_041228	Bra032366	dM2	3.15e-06	1.71e-07	22	52.4638	wM2	1.11e-05	1.29e-06	0	28.9341	A
XLOC_005372	Bra023513	dM2	0.00153479	0.000589779	20	147.79	wM7	0.00412171	0.00190181	19	123.752	A
XLOC_032032	Bra030868	dM2	0.000333867	9.26e-05	22	42.601	wM2	6.46e-06	5.92e-07	22	14.1858	A
XLOC_002536	Bra011585	dM2	0.003423	0.00151876	21	128.556	wM2	2.73e-06	1.71e-07	22	96.4564	A
XLOC_035042	Bra010622_Bra010623	dM2	1.66e-05	1.88e-06	22	143.894	wM9	0.000799029	0.000275495	22	110.366	A
XLOC_005054	Bra028586	dM2	0.00725001	0.0036379	22	218.885	wM2	0.00868696	0.00447811	22	178.355	A
XLOC_044746	Bra015530	dM2	0.00606981	0.00294312	22	100.588	wM9	0.0018569	0.000752483	22	58.6863	A
XLOC_043242	Bra015274	dM2	0.000164103	3.84e-05	22	104.007	wM2	4.86e-06	3.95e-07	22	61.1946	A
XLOC_023576	Bra037993	dM2	0.00280851	0.00120739	0	202.571	wM4	4.35e-05	7.75e-06	0	159.2	A
XLOC_011782	Bra001722	dM2	0.000164103	3.84e-05	20	183.092	wM2	0.000198087	5.18e-05	20	133.662	A
XLOC_034349	Bra035486	dM2	0.000526591	0.000161509	18	277.649	wM2	0.00150923	0.000589779	20	216.359	A
XLOC_033410	Bra016353_Bra016354	dM2	0.00124721	0.000459966	21	378.716	wM2	5.62e-05	1.08e-05	22	316.862	A
XLOC_036200	Bra037207	dM2	0.000820427	0.000275495	20	194.285	wM2	0.00015476	3.84e-05	20	131.076	A
XLOC_023692	Bra018907	dM2	4.07e-06	2.61e-07	22	252.52	wM2	1.2e-06	4.44e-08	0	185.037	A
XLOC_023545	Bra039113	dM2	3.15e-06	1.71e-07	22	870.3	wM2	1.6e-06	7.04e-08	22	802.227	A
XLOC_005354	Bra023485_Bra023486	dM2	9.63e-06	8.78e-07	20	562.602	wM2	0.00122491	0.000459966	20	435.549	A
XLOC_039046	Bra026950	dM2	6.13e-05	1.08e-05	22	397.981	wM9	0.0018569	0.000752483	22	220.674	A
XLOC_019877	Bra005253	dM2	7.89e-05	1.5e-05	20	3.87845	wM2	0.0103934	0.00549005	20	3.24315	R
XLOC_034154	Bra014051	dM2	0.000333867	9.26e-05	22	1.6733	wM6	0.0103934	0.00549005	0	1.84187	R
XLOC_007100	Bra020496	dM2	0.000421201	0.000122629	0	7.71468	wM2	0.0103934	0.00549005	0	7.07474	R
XLOC_035943	Bra039076	dM2	0.000658514	0.000211519	22	2.59265	wM2	0.0103934	0.00549005	0	1.16414	R
XLOC_025701	Bra033693	dM2	0.00280851	0.00120739	20	4.75447	wM10	0.0103934	0.00549005	21	2.45298	R
XLOC_033828	Bra030597_Bra030598	dM2	0.003423	0.00151876	20	2.189	wM2	0.0103934	0.00549005	22	2.49198	R
XLOC_024598	Bra038290_Bra038291	dM2	0.00606981	0.00294312	18	3.9325	wM2	0.0103934	0.00549005	22	8.05628	R
XLOC_005904	Bra022486_Bra022487_Bra022488	dM2	0.00870082	0.00447811	0	7.10218	wM3	0.0103934	0.00549005	1	21.0916	R
XLOC_023962	Bra019854_Bra019855_Bra019856	dM2	0.000263727	6.95e-05	22	3.29137	wM2	0.0124242	0.00670393	22	3.69619	R
XLOC_040150	Bra027673	dM2	0.000333867	9.26e-05	22	3.22653	wM2	0.0124242	0.00670393	22	2.81018	R
XLOC_034192	Bra013983	dM2	0.000526591	0.000161509	20	2.81386	wM2	0.0124242	0.00670393	20	1.96583	R
XLOC_000710	Bra013744	dM2	0.000658514	0.000211519	20	1.1304	wM2	0.0124242	0.00670393	20	1.09179	R
XLOC_032493	Bra035512	dM2	0.000658514	0.000211519	20	1.77661	wM2	0.0124242	0.00670393	20	2.68623	R
XLOC_018688	Bra034343	dM2	0.000820427	0.000275495	20	8.53414	wM9	0.0124242	0.00670393	22	4.95512	R
XLOC_046476	Bra035349	dM2	0.00101527	0.000356905	0	107.657	wM9	0.0124242	0.00670393	0	84.0255	R
XLOC_045783	Bra008746	dM2	0.00188574	0.000752483	0	3.19725	wM4	0.0124242	0.00670393	0	1.72202	R
XLOC_005500	Bra020056	dM2	0.003423	0.00151876	20	4.15067	wM9	0.0124242	0.00670393	21	2.79101	R
XLOC_023303	Bra029826	dM2	0.00725001	0.0036379	0	2.51928	wM2	0.0124242	0.00670393	0	6.98438	R
XLOC_005441	Bra023627	dM2	0.00870082	0.00447811	20	6.45221	wM6	0.0124242	0.00670393	22	6.81962	R
XLOC_018709	Bra034377	dM2	4.77e-05	7.75e-06	0	14.9953	wM2	0.0147373	0.00815436	0	6.32203	R
XLOC_000978	Bra026238	dM2	7.89e-05	1.5e-05	20	0.904984	wM2	0.0147373	0.00815436	20	1.21341	R
XLOC_044889	Bra015227	dM2	0.000421201	0.000122629	20	15.9473	wM2	0.0147373	0.00815436	20	23.6249	R
XLOC_043949	Bra002215	dM2	0.000658514	0.000211519	20	2.65293	wM2	0.0147373	0.00815436	20	1.20335	R
XLOC_033336	Bra010999_Bra011000	dM2	0.000820427	0.000275495	22	14.43	wM6	0.0147373	0.00815436	0	4.40273	R
XLOC_017956	Bra014678	dM2	0.00101527	0.000356905	20	44.9154	wM2	0.0147373	0.00815436	22	12.3826	R
XLOC_043230	Bra015301	dM2	0.00230246	0.000955433	20	6.8426	wM2	0.0147373	0.00815436	22	8.30716	R
XLOC_030348	Bra030121	dM2	0.00503389	0.00237097	22	2.33052	wM2	0.0147373	0.00815436	20	0.678568	R
XLOC_025784	Bra038021	dM2	0.00870082	0.00447811	0	0.688156	wM4	0.0147373	0.00815436	0	1.22089	R
XLOC_032161	Bra014278	dM2	0.00870082	0.00447811	22	5.56868	wM6	0.0147373	0.00815436	23	3.75622	R
XLOC_046620	Bra036927	dM2	4.77e-05	7.75e-06	22	1.82236	wM4	0.0173944	0.00988072	22	2.09404	R
XLOC_024434	Bra017966_Bra017967	dM2	0.000333867	9.26e-05	20	6.49767	wM2	0.0173944	0.00988072	22	6.2714	R
XLOC_016527	Bra032770	dM2	0.000820427	0.000275495	22	0.65266	wM9	0.0173944	0.00988072	22	2.78706	R
XLOC_036423	Bra027791	dM2	0.00101527	0.000356905	22	2.51355	wM2	0.0173944	0.00988072	20	3.08546	R
XLOC_046803	Bra038971	dM2	0.003423	0.00151876	22	3.39037	wM2	0.0173944	0.00988072	20	4.58583	R
XLOC_037416	Bra023306	dM2	0.00417337	0.00190181	20	5.52201	wM2	0.0173944	0.00988072	21	4.58502	R
XLOC_011808	Bra001767	dM2	0.00503389	0.00237097	0	1.1667	wM2	0.0173944	0.00988072	22	1.11973	R
XLOC_032155	Bra014285	dM2	0.00503389	0.00237097	21	10.304	wM2	0.0173944	0.00988072	21	4.04055	R
XLOC_041916	Bra007358_Bra007359	dM2	0.00503389	0.00237097	18	1.39344	wM2	0.0173944	0.00988072	22	3.1892	R
XLOC_010860	Bra000102	dM2	0.00870082	0.00447811	20	22.9826	wM2	0.0173944	0.00988072	22	26.0244	R
XLOC_000388	Bra011145	dM2	0.003423	0.00151876	20	3.00822	wM10	0.0191932	0.0109042	0	3.23465	R
XLOC_026118	Bra019975	dM2	9.57e-07	2.77e-08	22	3.76855	wM2	0.0204803	0.0119277	22	2.18175	R
XLOC_042225	Bra007834	dM2	3.66e-05	5.5e-06	20	10.2316	wM2	0.0204803	0.0119277	20	4.94543	R
XLOC_040366	Bra027932	dM2	7.89e-05	1.5e-05	20	6.4112	wM9	0.0204803	0.0119277	22	4.61967	R
XLOC_038457	Bra007608_Bra007609	dM2	0.000129226	2.83e-05	20	0.835871	wM9	0.0204803	0.0119277	20	1.26975	R
XLOC_037917	Bra036785_Bra036786	dM2	0.000263727	6.95e-05	22	0.704441	wM4	0.0204803	0.0119277	0	0.982843	R
XLOC_004944	Bra028397	dM2	0.00124721	0.000459966	20	5.21901	wM2	0.0204803	0.0119277	20	5.2777	R
XLOC_030917	Bra003325_Bra003326	dM2	0.00124721	0.000459966	22	2.76455	wM2	0.0204803	0.0119277	0	1.96573	R
XLOC_033238	Bra010832_Bra010833	dM2	0.00124721	0.000459966	22	2.82618	wM10	0.0204803	0.0119277	21	1.27232	R
XLOC_041528	Bra036858	dM2	0.00188574	0.000752483	19	4.79468	wM2	0.0204803	0.0119277	22	4.82933	R
XLOC_014798	Bra001391	dM2	0.00230246	0.000955433	0	2.79229	wM4	0.0204803	0.0119277	22	2.41385	R
XLOC_036151	Bra037772	dM2	0.00230246	0.000955433	20	14.6929	wM2	0.0204803	0.0119277	21	13.1855	R
XLOC_015844	Bra024136	dM2	0.00725001	0.0036379	22	28.825	wM6	0.0204803	0.0119277	20	19.1442	R
XLOC_004897	Bra040234	dM2	0.00153479	0.000589779	22	1.80437	wM2	0.0241241	0.0143459	22	2.7309	R
XLOC_003204	Bra013828	dM2	0.00503389	0.00237097	22	1.19376	wM2	0.0241241	0.0143459	20	1.62326	R
XLOC_011492	Bra001214	dM2	0.00606981	0.00294312	22	5.34891	wM6	0.0241241	0.0143459	22	5.85166	R
XLOC_013025	Bra005743	dM2	0.00230246	0.000955433	0	52.3816	wM2	0.0282411	0.0171921	0	53.7528	R
XLOC_039559	Bra037305	dM2	0.00280851	0.00120739	20	2.63906	wM2	0.0282411	0.0171921	18	2.55548	R
XLOC_011107	Bra000544	dM2	0.003423	0.00151876	22	1.75557	wM2	0.0282411	0.0171921	21	2.08281	R
XLOC_047112	Bra040215	dM2	0.00417337	0.00190181	22	0.184838	wM2	0.0282411	0.0171921	22	0	R
XLOC_036031	Bra036216	dM2	0.00503389	0.00237097	20	26.3775	wM2	0.0282411	0.0171921	18	23.4875	R
XLOC_038645	Bra039216	dM2	0.00503389	0.00237097	20	4.78247	wM15	0.0282411	0.0171921	22	4.28268	R
XLOC_031257	Bra003938	dM2	0.00870082	0.00447811	18	3.41094	wM2	0.0282411	0.0171921	0	8.01781	R
XLOC_028846	Bra003203	dM2	2.85e-05	3.88e-06	22	3.94375	wM6	0.0329852	0.0205299	22	1.35001	R
XLOC_002541	Bra011578	dM2	0.00153479	0.000589779	20	3.63502	wM2	0.0329852	0.0205299	20	6.03417	R
XLOC_013435	Bra006459	dM2	0.00153479	0.000589779	0	0.998576	wM3	0.0329852	0.0205299	0	0.812324	R
XLOC_011864	Bra001865	dM2	0.00188574	0.000752483	22	2.10178	wM2	0.0329852	0.0205299	20	1.1984	R
XLOC_044832	Bra015349	dM2	0.00503389	0.00237097	20	2.02431	wM4	0.0329852	0.0205299	0	0.3539	R
XLOC_025566	Bra024968_Bra024969	dM2	0.00725001	0.0036379	18	39.1468	wM9	0.0329852	0.0205299	20	46.6065	R
XLOC_008858	Bra008439	dM2	0.00870082	0.00447811	22	2.67449	wM9	0.0329852	0.0205299	22	1.91192	R
XLOC_034686	Bra034644_Bra034645_tRNA-Glu	dM2	0.00870082	0.00447811	20	8.02191	wM2	0.0329852	0.0205299	2	4.14633	R
XLOC_003056	Bra013550	dM2	0.000421201	0.000122629	20	1.67443	wM7	0.0385429	0.0244305	19	0.461175	R
XLOC_024380	Bra025842	dM2	0.00153479	0.000589779	20	3.30792	wM2	0.0385429	0.0244305	22	0.514137	R
XLOC_041151	Bra023164	dM2	0.00153479	0.000589779	22	2.78148	wM2	0.0385429	0.0244305	22	2.57938	R
XLOC_009254	Bra033035	dM2	0.00230246	0.000955433	18	2.72086	wM2	0.0385429	0.0244305	18	4.62028	R
XLOC_037903	Bra036810	dM2	0.00280851	0.00120739	22	3.95775	wM2	0.0385429	0.0244305	20	2.36447	R
XLOC_005547	Bra020154	dM2	0.00417337	0.00190181	18	10.3157	wM2	0.0385429	0.0244305	18	8.81974	R
XLOC_000172	Bra011589	dM2	0.00606981	0.00294312	20	1.75271	wM2	0.0385429	0.0244305	20	2.02443	R
XLOC_017501	Bra017081	dM2	6.13e-05	1.08e-05	22	2.50911	wM4	0.0447399	0.0289726	22	0.296702	R
XLOC_014023	Bra000005	dM2	0.000129226	2.83e-05	22	2.90112	wM4	0.0447399	0.0289726	0	1.02389	R
XLOC_029072	Bra003607	dM2	0.000421201	0.000122629	18	11.4999	wM2	0.0447399	0.0289726	18	21.4226	R
XLOC_026360	Bra026136	dM2	0.000526591	0.000161509	22	2.09792	wM2	0.0447399	0.0289726	22	3.05435	R
XLOC_018150	Bra032733	dM2	0.000658514	0.000211519	20	13.3729	wM2	0.0447399	0.0289726	22	10.958	R
XLOC_000322	Bra011282	dM2	0.00153479	0.000589779	0	6.79891	wM4	0.0447399	0.0289726	0	1.19454	R
XLOC_020146	Bra018307	dM2	0.00280851	0.00120739	0	3.75035	wM4	0.0447399	0.0289726	1	3.36526	R
XLOC_028147	Bra039904_Bra039905	dM2	0.00280851	0.00120739	0	2.42733	wM2	0.0447399	0.0289726	0	0	R
XLOC_042211	Bra007814	dM2	0.00417337	0.00190181	22	1.90049	wM2	0.0447399	0.0289726	0	2.2312	R
XLOC_043404	Bra033218	dM2	0.00870082	0.00447811	20	1.75942	wM2	0.0447399	0.0289726	20	2.42573	R
XLOC_002970	Bra013394_Bra013395	dM2	0.00280851	0.00120739	18	8.50593	wM2	0.0519391	0.0342436	22	26.5299	R
XLOC_010639	Bra022836	dM2	0.00280851	0.00120739	0	2.58306	wM4	0.0519391	0.0342436	22	2.29873	R
XLOC_046886	Bra039340	dM2	0.003423	0.00151876	0	1.41789	wM2	0.0519391	0.0342436	23	1.11572	R
XLOC_003294	Bra026482	dM2	0.00153479	0.000589779	22	3.71684	wM3	0.0601243	0.0403398	0	2.42828	R
XLOC_011425	Bra001083	dM2	0.00153479	0.000589779	22	1.53419	wM4	0.0601243	0.0403398	23	0.638952	R
XLOC_010458	Bra028953	dM2	0.00188574	0.000752483	0	3.94749	wM4	0.0601243	0.0403398	23	3.00146	R
XLOC_024784	Bra024299	dM2	0.00503389	0.00237097	20	0.393229	wM8	0.0601243	0.0403398	18	2.32535	R
XLOC_012855	Bra017671	dM2	0.00188574	0.000752483	0	4.45788	wM6	0.0693755	0.0473666	0	7.41967	R
XLOC_021235	Bra029847	dM2	0.00188574	0.000752483	22	18.2274	wM2	0.0693755	0.0473666	22	16.3734	R
XLOC_041860	Bra007272	dM2	0.00188574	0.000752483	20	2.1757	wM2	0.0693755	0.0473666	18	2.26922	R
XLOC_010194	Bra006357	dM2	0.00280851	0.00120739	0	0	wM6	0.0693755	0.0473666	0	67.4099	R
XLOC_018431	Bra030333	dM2	0.00417337	0.00190181	0	3.74506	wM2	0.0693755	0.0473666	23	1.35598	R
XLOC_005947	Bra034031	dM2	0.00725001	0.0036379	22	2.13873	wM2	0.0693755	0.0473666	21	2.47522	R
XLOC_025577	Bra024989	dM2	0.00725001	0.0036379	18	1.87572	wM2	0.0693755	0.0473666	NA	0.270758	R
XLOC_008683	Bra008146	dM2	0.000164103	3.84e-05	20	4.3369	wM2	0.0800484	0.0554394	20	4.87527	R
XLOC_047799	Bra041043	dM2	0.000526591	0.000161509	20	12.5971	wM6	0.0918294	0.0646837	20	9.79088	R
XLOC_008953	Bra033155	dM2	0.00606981	0.00294312	20	5.24369	wM6	0.0918294	0.0646837	22	1.99751	R
XLOC_004917	Bra040133	dM2	7.89e-05	1.5e-05	0	2.18411	wM9	0.10502	0.0752356	22	1.59721	R
XLOC_019348	Bra037655	dM2	0.00188574	0.000752483	20	5.73987	wM2	0.10502	0.0752356	19	1.27785	R
XLOC_015430	Bra012731	dM2	0.003423	0.00151876	20	2.14734	wM6	0.10502	0.0752356	20	1.73156	R
XLOC_042433	Bra031040	dM2	0.00725001	0.0036379	22	0.793805	wM2	0.10502	0.0752356	22	0.967294	R
XLOC_000049	Bra011812	dM2	0.00417337	0.00190181	20	25.5907	wM6	0.120193	0.0872416	20	24.3038	R
XLOC_032731	Bra020884	dM2	0.00503389	0.00237097	20	4.69575	wM9	0.120193	0.0872416	0	3.75658	R
XLOC_042215	Bra007820	dM2	0.00503389	0.00237097	22	28.2454	wM9	0.120193	0.0872416	22	50.9018	R
XLOC_045980	Bra009134	dM2	0.00606981	0.00294312	0	2.69809	wM4	0.120193	0.0872416	23	1.22962	R
XLOC_004966	Bra028433_Bra028434	dM2	0.000263727	6.95e-05	20	2.0577	wM2	0.136948	0.100859	20	1.63678	R
XLOC_023747	Bra018795	dM2	0.00124721	0.000459966	22	2.18091	wM4	0.136948	0.100859	0	2.24529	R
XLOC_003679	Bra033833	dM2	0.00153479	0.000589779	0	0.42227	wM4	0.136948	0.100859	0	1.30026	R
XLOC_013262	Bra006148	dM2	0.00153479	0.000589779	20	3.64959	wM2	0.136948	0.100859	23	1.05741	R
XLOC_038239	Bra007321	dM2	0.00188574	0.000752483	0	1.7938	wM4	0.136948	0.100859	0	0.899016	R
XLOC_014272	Bra000441	dM2	0.003423	0.00151876	22	2.67286	wM15	0.136948	0.100859	20	1.8701	R
XLOC_045991	Bra009165_Bra009166_tRNA-Leu	dM2	0.00417337	0.00190181	21	3.4557	wM2	0.155156	0.116257	18	1.81026	R
XLOC_006545	Bra033200	dM2	0.00503389	0.00237097	20	13.2356	wM6	0.155156	0.116257	20	10.3795	R
XLOC_005047	Bra028570	dM2	0.00606981	0.00294312	22	0	wM4	0.155156	0.116257	2	1.43997	R
XLOC_035968	Bra039048	dM2	0.00725001	0.0036379	20	8.26077	wM2	0.155156	0.116257	21	4.13657	R
XLOC_047128	Bra040255_Bra040256	dM2	0.00725001	0.0036379	20	1.1895	wM2	0.155156	0.116257	22	1.47054	R
XLOC_026411	Bra026017_Bra026018	dM2	0.00230246	0.000955433	21	19.1289	wM2	0.175784	0.133615	20	17.0988	R
XLOC_027158	Bra009718	dM2	0.00230246	0.000955433	22	3.12014	wM2	0.175784	0.133615	20	0.744166	R
XLOC_045059	Bra003049	dM2	0.00280851	0.00120739	20	8.66623	wM6	0.175784	0.133615	20	6.77592	R
XLOC_009241	Bra033053_Bra033054	dM2	0.000263727	6.95e-05	20	0.754978	wM10	0.198669	0.153123	18	1.45409	R
XLOC_038250	Bra007337	dM2	0.00417337	0.00190181	0	5e-15	wM4	0.198669	0.153123	1	1.50882	R
XLOC_042835	Bra031589	dM2	0.00503389	0.00237097	22	15.5831	wM13	0.198669	0.153123	22	9.78204	R
XLOC_045863	Bra008919	dM2	0.00870082	0.00447811	20	0.764948	wM2	0.198669	0.153123	21	1.39894	R
XLOC_015492	Bra012620	dM2	0.000333867	9.26e-05	22	0.999354	wM2	0.252664	0.199403	20	1.05196	R
XLOC_022881	Bra022310	dM2	0.000333867	9.26e-05	22	2.44277	wM2	0.252664	0.199403	22	0.558473	R
XLOC_006762	Bra026628_Bra026629	dM2	0.00725001	0.0036379	20	0.134718	wM2	0.284122	0.226605	20	1.54285	R
XLOC_010206	Bra006377	dM2	0.000820427	0.000275495	22	1.50298	wM2	0.355768	0.290281	20	0.318276	R
XLOC_014165	Bra000246_Bra000247	dM2	0.00230246	0.000955433	18	3.27808	wM2	0.441589	0.36793	20	5.66605	R
XLOC_038686	Bra039925	dM2	0.00503389	0.00237097	20	21.6157	wM2	0.441589	0.36793	0	9.11751	R
XLOC_024709	Bra019446	dM2	0.00870082	0.00447811	0	2.70511	wM4	0.441589	0.36793	0	0.222809	R
XLOC_011927	Bra013233	dM2	0.00417337	0.00190181	1	2.84794	wM4	0.542604	0.461566	2	2.67661	R
XLOC_032861	Bra040069	dM2	0.00606981	0.00294312	20	0.27959	wM1	0.542604	0.461566	14	1.81578	R
XLOC_006753	Bra026613	dM2	0.00606981	0.00294312	20	2.02091	wM10	0.599739	0.51502	18	0	R
XLOC_036069	Bra036127	dM2	0.003423	0.00151876	0	1.34343	wM4	0.660684	0.573241	22	1.57565	R
XLOC_013054	Bra005787	dM2	0.00606981	0.00294312	18	4.16161	wM2	0.660684	0.573241	22	0	R
XLOC_023471	Bra039439_Bra039440	dM2	0.00188574	0.000752483	20	1.70271	wM6	0.727477	0.636484	21	0.394	R
XLOC_045528	Bra002195	dM2	0.00725001	0.0036379	16	2.14787	wM4	0.798814	0.704998	20	1.0169	R
XLOC_016353	Bra014671	dM2	0.000207844	5.18e-05	21	7.03607	wM2	0.875121	0.779026	18	3.39878	R
XLOC_044989	Bra033280	dM2	0.000421201	0.000122629	20	25.8817	wM6	0.875121	0.779026	23	5.90823	R
XLOC_008036	Bra020249	dM2	0.00153479	0.000589779	20	1.5644	wM10	0.875121	0.779026	20	0.303306	R
XLOC_012722	Bra024029	dM2	0.00725001	0.0036379	20	13.416	wM6	0.95537	0.858799	0	7.40984	R
XLOC_019896	Bra005285	dM2	0.000820427	0.000275495	0	5.90448	wM6	1	1	NA	1.68e-15	R
XLOC_028976	Bra003433	dM2	0.00188574	0.000752483	22	2.39956	wM1	1	1	NA	0.417577	R
XLOC_008739	Bra008247	dM2	0.00725001	0.0036379	20	6.46557	wM6	1	1	NA	0.877819	R
XLOC_002951	Bra013365	dM2	0.00870082	0.00447811	18	0.870392	wM2	1	1	NA	0.215759	R
XLOC_002381	Bra011891	dM20	0.000207844	5.18e-05	22	29.055	wM2	0.000987752	0.000356905	22	95.9926	A
XLOC_000007	Bra011889	dM20	0.000526591	0.000161509	22	25.1008	wM2	0.00499771	0.00237097	22	38.1522	A
XLOC_015181	Bra013152	dM20	0.00280851	0.00120739	22	1.3131	wM2	0.0241241	0.0143459	0	0.602031	R
XLOC_035730	Bra030659	dM3	0.00503389	0.00237097	0	23.8295	wM6	0.00150923	0.000589779	2	807.933	A
XLOC_039817	Bra037761	dM3	5.45e-06	3.95e-07	0	1301.83	wM2	1.11e-05	1.29e-06	0	1592.54	A
XLOC_001150	Bra038863	dM3	0.00101527	0.000356905	22	87.8432	wM2	0.000120338	2.83e-05	0	324.124	A
XLOC_013299	Bra006208	dM3	8.39e-08	6.57e-10	2	400.079	wM3	1.27e-09	4.62e-13	2	584.359	A
XLOC_044917	Bra033412	dM3	0.00124721	0.000459966	0	64.5023	wM2	0.00015476	3.84e-05	0	241.616	A
XLOC_046537	Bra035392	dM3	2.17e-05	2.71e-06	0	135.821	wM3	9.06e-07	2.77e-08	2	299.177	A
XLOC_021542	Bra004504	dM3	2.33e-06	1.1e-07	2	160	wM3	7.32e-05	1.5e-05	2	297.507	A
XLOC_028363	Bra030181	dM3	1.84e-07	2.08e-09	2	287.652	wM3	9.06e-07	2.77e-08	2	415.485	A
XLOC_033182	Bra010717_Bra010718	dM3	7.33e-06	5.92e-07	0	732.687	wM3	3.32e-05	5.5e-06	1	859.58	A
XLOC_002475	Bra011719	dM3	0.000526591	0.000161509	2	13.9265	wM6	0.000253031	6.95e-05	2	139.703	A
XLOC_023565	Bra038011	dM3	0.000526591	0.000161509	2	277.674	wM3	9.03e-08	6.57e-10	2	387.405	A
XLOC_018451	Bra030302_Bra030303	dM3	1.27e-05	1.29e-06	0	283.082	wM4	3.32e-05	5.5e-06	2	387.487	A
XLOC_030669	Bra012083	dM3	0.000164103	3.84e-05	0	234.71	wM3	1.47e-05	1.88e-06	2	337.311	A
XLOC_037777	Bra024579_Bra024580	dM3	8.39e-08	6.57e-10	0	183.037	wM3	1.6e-06	7.04e-08	0	271.463	A
XLOC_000772	Bra013859	dM3	6.13e-05	1.08e-05	0	194.008	wM3	1.94e-05	2.71e-06	2	258.006	A
XLOC_015042	Bra001809	dM3	0.00606981	0.00294312	2	156.544	wM6	0.000987752	0.000356905	2	211.884	A
XLOC_007415	Bra028418	dM3	1.75e-06	7.04e-08	1	38.9213	wM9	0.000322366	9.26e-05	0	81.6836	A
XLOC_030856	Bra003236	dM3	7.05e-07	1.7e-08	0	76.5137	wM3	9.06e-07	2.77e-08	0	109.737	A
XLOC_007831	Bra023598	dM3	0.000658514	0.000211519	0	33.3303	wM4	0.000511887	0.000161509	0	64.9615	A
XLOC_043203	Bra015350	dM3	0.00503389	0.00237097	0	7.3928	wM4	0.0033966	0.00151876	0	37.6421	A
XLOC_011200	Bra000708	dM3	4.3e-08	1.91e-10	2	201.4	wM3	3.59e-07	6.14e-09	2	231.075	A
XLOC_006591	Bra022019	dM3	0.000263727	6.95e-05	2	170.845	wM3	0.00040536	0.000122629	2	199.976	A
XLOC_028872	Bra003256	dM3	1.29e-06	4.44e-08	0	232.886	wM3	1.93e-08	5.08e-11	2	257.373	A
XLOC_017336	Bra021913	dM3	3.53e-09	5.65e-12	0	41.5091	wM3	2.56e-07	3.6e-09	2	64.838	A
XLOC_037796	Bra024540_Bra024541	dM3	0.000658514	0.000211519	2	20.178	wM6	0.000198087	5.18e-05	2	43.3478	A
XLOC_033997	Bra014317	dM3	1.66e-05	1.88e-06	2	212.53	wM3	5.62e-05	1.08e-05	2	235.547	A
XLOC_029502	Bra004388_Bra004389_Bra004390_Bra004391	dM3	1.27e-05	1.29e-06	0	80.3111	wM3	1.6e-06	7.04e-08	0	102.826	A
XLOC_032305	Bra014005	dM3	0.00870082	0.00447811	0	29.946	wM2	0.00868696	0.00447811	23	51.1157	A
XLOC_031785	Bra015787	dM3	0.000164103	3.84e-05	2	199.188	wM6	0.00278927	0.00120739	2	218.883	A
XLOC_019501	Bra004546	dM3	0.00230246	0.000955433	0	22.3806	wM4	1.2e-06	4.44e-08	0	41.0129	A
XLOC_003349	Bra026398	dM3	0.00230246	0.000955433	2	162.726	wM4	0.00150923	0.000589779	2	181.241	A
XLOC_047889	Bra041111	dM3	0.000421201	0.000122629	0	10.0348	wM3	4.86e-06	3.95e-07	2	26.9197	A
XLOC_036065	Bra036140	dM3	0.00153479	0.000589779	0	14.9092	wM4	0.0018569	0.000752483	0	30.5979	A
XLOC_022125	Bra005612	dM3	0.00606981	0.00294312	0	9.10966	wM2	0.00499771	0.00237097	2	24.6222	A
XLOC_037172	Bra017525	dM3	2.85e-05	3.88e-06	0	40.8466	wM3	9.34e-05	2.07e-05	0	56.1207	A
XLOC_035887	Bra037389	dM3	1.75e-06	7.04e-08	0	48.5316	wM3	3.67e-06	2.61e-07	2	63.4282	A
XLOC_045057	Bra003053	dM3	0.00725001	0.0036379	2	24.0027	wM3	5.62e-05	1.08e-05	2	38.3556	A
XLOC_019738	Bra004997	dM3	0.000100996	2.07e-05	0	9.42573	wM4	5.62e-05	1.08e-05	0	23.5502	A
XLOC_002944	Bra013352_tRNA-Gly	dM3	2.56e-07	3.6e-09	2	64.2761	wM3	2.56e-07	3.6e-09	2	78.0634	A
XLOC_010762	Bra023033	dM3	3.15e-06	1.71e-07	0	23.7964	wM3	9.06e-07	2.77e-08	0	37.349	A
XLOC_036974	Bra027535	dM3	0.000333867	9.26e-05	0	18.1871	wM3	0.000120338	2.83e-05	0	31.515	A
XLOC_032467	Bra036739	dM3	2.56e-07	3.6e-09	2	23.4364	wM3	4.86e-06	3.95e-07	2	36.6048	A
XLOC_024857	Bra024415	dM3	6.1e-08	3.58e-10	2	106.558	wM3	6.46e-08	3.58e-10	2	119.698	A
XLOC_038373	Bra007497_Bra007499	dM3	0.000207844	5.18e-05	2	11.684	wM6	0.000253031	6.95e-05	2	24.5741	A
XLOC_022558	Bra033851	dM3	3.66e-05	5.5e-06	0	22.4062	wM2	4.86e-06	3.95e-07	0	35.0948	A
XLOC_011022	Bra000408	dM3	0.000820427	0.000275495	0	13.458	wM4	1.6e-06	7.04e-08	0	25.3926	A
XLOC_029049	Bra003564	dM3	0.00230246	0.000955433	0	29.8845	wM2	5.62e-05	1.08e-05	0	41.737	A
XLOC_015171	Bra013172_Bra013173	dM3	1.75e-06	7.04e-08	0	330.157	wM3	1.05e-05	1.08e-06	0	341.558	A
XLOC_021671	Bra004721	dM3	7.05e-07	1.7e-08	2	45.6112	wM3	3.67e-06	2.61e-07	2	56.5128	A
XLOC_037394	Bra028025	dM3	3.15e-06	1.71e-07	0	18.1089	wM3	1.11e-05	1.29e-06	2	28.7176	A
XLOC_021765	Bra004940	dM3	7.05e-07	1.7e-08	0	77.3505	wM3	1.11e-05	1.29e-06	0	87.7974	A
XLOC_019963	Bra005397	dM3	7.33e-06	5.92e-07	0	11.2679	wM4	1.2e-06	4.44e-08	0	21.4537	A
XLOC_032189	Bra014233	dM3	0.000421201	0.000122629	0	67.3624	wM4	0.000253031	6.95e-05	1	77.513	A
XLOC_015127	Bra001952	dM3	0.000658514	0.000211519	0	36.7502	wM4	0.000799029	0.000275495	2	26.6929	A
XLOC_007899	Bra023713	dM3	0.00280851	0.00120739	0	15.855	wM4	0.00868696	0.00447811	2	5.4554	A
XLOC_019977	Bra005425	dM3	1.29e-06	4.44e-08	2	45.1036	wM3	2.73e-06	1.71e-07	4	34.5853	A
XLOC_019335	Bra037675	dM3	3.66e-05	5.5e-06	0	55.0573	wM2	0.000511887	0.000161509	2	44.2331	A
XLOC_009310	Bra032951	dM3	1.24e-07	1.18e-09	0	65.039	wM2	3.67e-06	2.61e-07	0	52.514	A
XLOC_038212	Bra007284_Bra007285_Bra007286	dM3	6.1e-08	3.58e-10	2	133.833	wM3	9.03e-08	6.57e-10	2	120.429	A
XLOC_036686	Bra027877	dM3	7.33e-06	5.92e-07	0	86.3429	wM3	4.86e-06	3.95e-07	0	72.1538	A
XLOC_046653	Bra036948	dM3	2.85e-05	3.88e-06	22	86.6446	wM3	0.00150923	0.000589779	22	72.2	A
XLOC_014443	Bra000757	dM3	2.85e-05	3.88e-06	0	198.338	wM3	1.47e-05	1.88e-06	0	183.723	A
XLOC_010482	Bra029001	dM3	2.85e-05	3.88e-06	0	123.655	wM4	5.62e-05	1.08e-05	0	107.123	A
XLOC_016169	Bra040449	dM3	5.45e-06	3.95e-07	0	85.1668	wM3	9.06e-07	2.77e-08	0	68.2917	A
XLOC_045052	Bra003066	dM3	9.57e-07	2.77e-08	0	68.3397	wM9	1.94e-05	2.71e-06	0	49.7945	A
XLOC_026554	Bra025812_Bra025813	dM3	4.07e-06	2.61e-07	2	124.709	wM3	9.34e-05	2.07e-05	2	105.697	A
XLOC_003834	Bra035447	dM3	0.000129226	2.83e-05	1	112.521	wM3	6.46e-06	5.92e-07	2	90.9781	A
XLOC_017737	Bra039300	dM3	0.000207844	5.18e-05	22	234.92	wM4	6.46e-06	5.92e-07	0	211.096	A
XLOC_010522	Bra029076	dM3	2.17e-05	2.71e-06	0	104.602	wM2	4.86e-06	3.95e-07	0	79.9717	A
XLOC_017612	Bra016888	dM3	1.27e-05	1.29e-06	4	205.46	wM3	2.07e-06	1.1e-07	4	180.419	A
XLOC_006227	Bra008152	dM3	1.84e-07	2.08e-09	0	148.781	wM3	5.01e-07	1.03e-08	0	122.959	A
XLOC_024814	Bra024339	dM3	9.57e-07	2.77e-08	0	151.503	wM3	6.7e-07	1.7e-08	0	118.372	A
XLOC_023255	Bra034862_Bra034863	dM3	2.8e-08	9.97e-11	0	221.345	wM3	1.31e-07	1.18e-09	0	188.028	A
XLOC_012499	Bra019193	dM3	7.33e-06	5.92e-07	0	113.355	wM2	1.6e-06	7.04e-08	0	78.9053	A
XLOC_027876	Bra025037	dM3	6.13e-05	1.08e-05	0	241.495	wM3	9.34e-05	2.07e-05	0	198.749	A
XLOC_029709	Bra015908	dM3	7.89e-05	1.5e-05	1	376.259	wM3	1.6e-06	7.04e-08	2	319.529	A
XLOC_031783	Bra015789_Bra015790	dM3	7.33e-06	5.92e-07	2	178.924	wM3	9.34e-05	2.07e-05	2	118.715	A
XLOC_031062	Bra003624	dM3	2.33e-06	1.1e-07	2	462.847	wM3	6.46e-06	5.92e-07	4	399.028	A
XLOC_031763	Bra015825_Bra015826_Bra015827	dM3	0.000263727	6.95e-05	0	147.365	wM9	0.00278927	0.00120739	1	72.8553	A
XLOC_032338	Bra034927	dM3	3.66e-05	5.5e-06	0	324.52	wM6	0.00412171	0.00190181	2	249.863	A
XLOC_026972	Bra024262	dM3	1.66e-05	1.88e-06	2	224.516	wM3	3.32e-05	5.5e-06	2	148.275	A
XLOC_002386	Bra011884	dM3	4.77e-05	7.75e-06	0	381.795	wM2	0.000799029	0.000275495	0	303.731	A
XLOC_024001	Bra019797	dM3	1.75e-06	7.04e-08	2	408.147	wM3	1.31e-07	1.18e-09	2	288.681	A
XLOC_006387	Bra008392_Bra008393	dM3	0.00153479	0.000589779	0	700.403	wM6	0.00602704	0.00294312	2	422.843	A
XLOC_018232	Bra028181	dM3	0.000526591	0.000161509	0	3072.66	wM2	0.00150923	0.000589779	0	2794.42	A
XLOC_043044	Bra015594	dM3	0.00153479	0.000589779	2	910.117	wM3	0.00412171	0.00190181	0	608.515	A
XLOC_018413	Bra025431	dM3	0.00280851	0.00120739	0	1855.59	wM9	0.00278927	0.00120739	0	1042.13	A
XLOC_016637	Bra028174	dM3	0.00417337	0.00190181	0	3994.3	wM9	0.00868696	0.00447811	0	602.809	A
XLOC_026850	Bra019527	dM3	3.66e-05	5.5e-06	0	15.2756	wM2	0.0103934	0.00549005	0	2.69528	R
XLOC_018055	Bra014865	dM3	0.00101527	0.000356905	2	1.56942	wM3	0.0103934	0.00549005	2	0.426739	R
XLOC_002538	Bra011582	dM3	0.00153479	0.000589779	2	1.71674	wM4	0.0103934	0.00549005	2	2.37041	R
XLOC_022341	Bra037076	dM3	0.00153479	0.000589779	20	1.19488	wM4	0.0103934	0.00549005	20	1.73735	R
XLOC_042865	Bra031539	dM3	0.00153479	0.000589779	0	20.3799	wM2	0.0103934	0.00549005	0	4.20446	R
XLOC_045590	Bra002086	dM3	0.00188574	0.000752483	0	17.732	wM4	0.0103934	0.00549005	1	9.11362	R
XLOC_021638	Bra004662_Bra004663	dM3	0.00230246	0.000955433	0	1.52728	wM4	0.0103934	0.00549005	0	1.44759	R
XLOC_001008	Bra038489	dM3	0.00280851	0.00120739	0	1.60878	wM2	0.0103934	0.00549005	22	1.48278	R
XLOC_022216	Bra018363	dM3	0.003423	0.00151876	2	8.57452	wM4	0.0103934	0.00549005	0	6.84608	R
XLOC_024397	Bra025869_Bra025870	dM3	0.003423	0.00151876	2	6.01861	wM3	0.0103934	0.00549005	2	18.8073	R
XLOC_024820	Bra024350	dM3	0.00417337	0.00190181	1	8.84569	wM6	0.0103934	0.00549005	2	19.0733	R
XLOC_001702	Bra037555	dM3	0.00503389	0.00237097	0	18.7267	wM2	0.0103934	0.00549005	0	13.1311	R
XLOC_029951	Bra036482	dM3	0.00503389	0.00237097	2	2.57626	wM4	0.0103934	0.00549005	2	3.29657	R
XLOC_002539	Bra011580	dM3	0.00606981	0.00294312	2	3.10257	wM6	0.0103934	0.00549005	2	3.3837	R
XLOC_015301	Bra012948	dM3	0.00606981	0.00294312	2	3.33587	wM4	0.0103934	0.00549005	0	3.03528	R
XLOC_022083	Bra005541	dM3	0.00606981	0.00294312	2	4.85429	wM3	0.0103934	0.00549005	1	4.83477	R
XLOC_000652	Bra013630	dM3	0.00725001	0.0036379	4	1.6697	wM3	0.0103934	0.00549005	4	1.64013	R
XLOC_020145	Bra018305	dM3	0.00725001	0.0036379	1	308.263	wM9	0.0103934	0.00549005	2	140.587	R
XLOC_026367	Bra026122	dM3	0.000526591	0.000161509	2	2.69111	wM2	0.0124242	0.00670393	2	4.02294	R
XLOC_010016	Bra006031	dM3	0.00230246	0.000955433	0	2.70949	wM4	0.0124242	0.00670393	22	2.90663	R
XLOC_030955	Bra003402	dM3	0.00280851	0.00120739	0	1.54533	wM4	0.0124242	0.00670393	22	1.60523	R
XLOC_003544	Bra039557	dM3	0.00417337	0.00190181	20	12.1215	wM4	0.0124242	0.00670393	22	8.73143	R
XLOC_023361	Bra029711	dM3	0.00417337	0.00190181	2	11.7704	wM3	0.0124242	0.00670393	2	4.05356	R
XLOC_038183	Bra007236	dM3	0.00725001	0.0036379	22	3.18297	wM4	0.0124242	0.00670393	22	2.0207	R
XLOC_001808	Bra021186	dM3	0.00870082	0.00447811	22	1.08346	wM6	0.0124242	0.00670393	22	1.14247	R
XLOC_041506	Bra036074	dM3	0.00870082	0.00447811	23	1.08189	wM4	0.0124242	0.00670393	22	0.554584	R
XLOC_028686	Bra012144	dM3	0.000100996	2.07e-05	0	3.5815	wM3	0.0147373	0.00815436	2	0.375403	R
XLOC_010757	Bra023027	dM3	0.000333867	9.26e-05	2	2.60117	wM4	0.0147373	0.00815436	0	2.68375	R
XLOC_010092	Bra006180	dM3	0.00124721	0.000459966	2	1.89959	wM4	0.0147373	0.00815436	2	1.91706	R
XLOC_016108	Bra017826	dM3	0.00153479	0.000589779	2	10.3703	wM4	0.0147373	0.00815436	2	9.14742	R
XLOC_011185	Bra000684	dM3	0.00230246	0.000955433	2	8.73383	wM3	0.0147373	0.00815436	2	7.32216	R
XLOC_030243	Bra014966	dM3	0.00417337	0.00190181	0	2.08184	wM4	0.0147373	0.00815436	22	0.230771	R
XLOC_021909	Bra005217	dM3	0.00503389	0.00237097	0	1.39658	wM4	0.0147373	0.00815436	2	0.887794	R
XLOC_000301	Bra011320	dM3	0.00870082	0.00447811	0	2.87338	wM4	0.0147373	0.00815436	0	1.82897	R
XLOC_006444	Bra008496	dM3	0.00038795	0.000107599	0	1.48064	wM4	0.016292	0.00901754	0	0.0612991	R
XLOC_043444	Bra003069	dM3	7.33e-06	5.92e-07	2	1.36921	wM4	0.0173944	0.00988072	2	1.2839	R
XLOC_026778	Bra038265	dM3	0.00124721	0.000459966	0	1.5644	wM4	0.0173944	0.00988072	0	2.18906	R
XLOC_016373	Bra014702	dM3	0.00417337	0.00190181	23	7.29985	wM9	0.0173944	0.00988072	0	10.3015	R
XLOC_021772	Bra004951	dM3	0.00417337	0.00190181	22	1.88493	wM4	0.0173944	0.00988072	22	1.76451	R
XLOC_031356	Bra004113	dM3	0.00503389	0.00237097	0	2.21381	wM4	0.0173944	0.00988072	1	2.08328	R
XLOC_036126	Bra035871	dM3	0.00870082	0.00447811	4	1.67152	wM3	0.0173944	0.00988072	4	1.40256	R
XLOC_040970	Bra029424	dM3	0.00870082	0.00447811	0	4.51516	wM3	0.0173944	0.00988072	1	4.13	R
XLOC_003267	Bra013949	dM3	0.00870082	0.00447811	0	1.07402	wM3	0.0204803	0.0119277	2	0	R
XLOC_028442	Bra030039	dM3	0.00870082	0.00447811	2	2.40911	wM4	0.0204803	0.0119277	0	21.3703	R
XLOC_030963	Bra003418	dM3	0.000207844	5.18e-05	0	1.66372	wM4	0.0241241	0.0143459	0	0.161531	R
XLOC_045124	Bra002942	dM3	0.00606981	0.00294312	0	1.73509	wM4	0.0241241	0.0143459	23	1.09287	R
XLOC_011237	Bra000774	dM3	0.00725001	0.0036379	2	1.28793	wM3	0.0241241	0.0143459	2	1.12111	R
XLOC_004834	Bra040040	dM3	0.00870082	0.00447811	0	7.30102	wM4	0.0241241	0.0143459	0	4.10256	R
XLOC_045780	Bra008737	dM3	0.00870082	0.00447811	0	1.23065	wM6	0.0241241	0.0143459	1	9.65363	R
XLOC_013234	Bra006103	dM3	0.00280851	0.00120739	2	6.63429	wM4	0.0282411	0.0171921	0	2.71847	R
XLOC_035973	Bra036516	dM3	0.00503389	0.00237097	2	5.20989	wM4	0.0282411	0.0171921	2	4.09019	R
XLOC_020579	Bra033863	dM3	0.00725001	0.0036379	2	15.0984	wM9	0.0282411	0.0171921	2	11.6843	R
XLOC_024329	Bra025759	dM3	0.00725001	0.0036379	0	1.80483	wM4	0.0282411	0.0171921	2	1.61731	R
XLOC_018175	Bra032684	dM3	0.000263727	6.95e-05	0	2.86272	wM6	0.0329852	0.0205299	0	1.3189	R
XLOC_007080	Bra020518	dM3	0.000820427	0.000275495	0	5.74489	wM6	0.0329852	0.0205299	0	10.8497	R
XLOC_028253	Bra015059	dM3	0.00124721	0.000459966	0	1.47375	wM2	0.0329852	0.0205299	0	0.297904	R
XLOC_038565	Bra007758	dM3	7.89e-05	1.5e-05	2	1.81449	wM3	0.0385429	0.0244305	4	1.66202	R
XLOC_010537	Bra029101	dM3	0.00230246	0.000955433	1	8.4309	wM3	0.0385429	0.0244305	2	9.76592	R
XLOC_001321	Bra035455	dM3	0.00503389	0.00237097	2	1.76918	wM4	0.0385429	0.0244305	2	2.29569	R
XLOC_005304	Bra023395	dM3	0.00503389	0.00237097	2	10.086	wM3	0.0385429	0.0244305	2	0	R
XLOC_043801	Bra002472	dM3	0.00503389	0.00237097	2	2.2288	wM11	0.0385429	0.0244305	6	0.894985	R
XLOC_035427	Bra016501	dM3	0.000129226	2.83e-05	0	1.5973	wM4	0.0447399	0.0289726	0	3.14878	R
XLOC_017186	Bra021655	dM3	0.00503389	0.00237097	2	7.82682	wM4	0.0447399	0.0289726	2	6.91692	R
XLOC_011955	Bra013187	dM3	0.00725001	0.0036379	0	1.96137	wM4	0.0447399	0.0289726	23	1.81461	R
XLOC_015151	Bra013217	dM3	0.00870082	0.00447811	2	1.25599	wM4	0.0447399	0.0289726	3	1.35102	R
XLOC_019597	Bra004746	dM3	0.00606981	0.00294312	1	1.01531	wM4	0.0519391	0.0342436	2	1.55918	R
XLOC_012756	Bra023968	dM3	4.77e-05	7.75e-06	2	1.95985	wM3	0.0601243	0.0403398	4	0.099999	R
XLOC_014230	Bra000367_Bra000368	dM3	0.000421201	0.000122629	2	9.93238	wM4	0.0601243	0.0403398	1	4.24462	R
XLOC_000384	Bra011155	dM3	0.00101527	0.000356905	2	3.13426	wM3	0.0601243	0.0403398	4	1.13018	R
XLOC_024161	Bra026097	dM3	0.00101527	0.000356905	2	3.70552	wM3	0.0601243	0.0403398	2	8.04511	R
XLOC_043674	Bra002677	dM3	0.00503389	0.00237097	2	0.795071	wM4	0.0601243	0.0403398	22	0.486702	R
XLOC_041822	Bra007225	dM3	0.00725001	0.0036379	0	5.10418	wM4	0.0601243	0.0403398	22	4.38901	R
XLOC_001450	Bra028353	dM3	0.00870082	0.00447811	2	2.84442	wM4	0.0601243	0.0403398	2	1.33615	R
XLOC_007138	Bra029395	dM3	0.00870082	0.00447811	0	2.81991	wM4	0.0601243	0.0403398	1	1.56037	R
XLOC_028626	Bra012235	dM3	0.00870082	0.00447811	0	1.13335	wM2	0.0601243	0.0403398	0	0.763958	R
XLOC_023610	Bra039672	dM3	0.000658514	0.000211519	22	1.01815	wM4	0.0693755	0.0473666	22	1.84544	R
XLOC_011945	Bra013201	dM3	0.00280851	0.00120739	0	1.19898	wM4	0.0693755	0.0473666	1	0.829648	R
XLOC_002809	Bra011097	dM3	0.000526591	0.000161509	2	5.8086	wM4	0.0800484	0.0554394	6	4.32368	R
XLOC_018532	Bra032182	dM3	0.000658514	0.000211519	0	7.91641	wM2	0.0800484	0.0554394	0	2.47749	R
XLOC_031711	Bra015918	dM3	0.00230246	0.000955433	2	7.63463	wM6	0.0918294	0.0646837	2	1.37193	R
XLOC_045710	Bra008616	dM3	0.00503389	0.00237097	2	0.775272	wM3	0.0918294	0.0646837	4	0.829861	R
XLOC_005279	Bra023337	dM3	0.000207844	5.18e-05	2	3.91518	wM4	0.10502	0.0752356	0	0.431264	R
XLOC_040379	Bra027956	dM3	0.000333867	9.26e-05	2	2.84504	wM3	0.120193	0.0872416	0	2.48202	R
XLOC_045839	Bra008859	dM3	0.000526591	0.000161509	2	1.40793	wM4	0.120193	0.0872416	5	0.731502	R
XLOC_028340	Bra014896	dM3	0.00153479	0.000589779	0	1.32985	wM4	0.120193	0.0872416	2	0	R
XLOC_038653	Bra039205	dM3	0.003423	0.00151876	2	5.43284	wM2	0.136948	0.100859	0	3.79342	R
XLOC_022591	Bra033909	dM3	2.85e-05	3.88e-06	2	2.0178	wM3	0.155156	0.116257	0	2.76097	R
XLOC_020781	Bra022460	dM3	0.00230246	0.000955433	23	0.540693	wM4	0.155156	0.116257	0	0	R
XLOC_008713	Bra008202	dM3	0.00280851	0.00120739	0	0.556429	wM3	0.155156	0.116257	2	1.30675	R
XLOC_044522	Bra009339	dM3	0.00503389	0.00237097	2	4.09964	wM4	0.198669	0.153123	0	3.25879	R
XLOC_011248	Bra000787	dM3	0.00606981	0.00294312	0	3.26733	wM3	0.198669	0.153123	0	5.30104	R
XLOC_022311	Bra018561	dM3	0.00606981	0.00294312	4	2.582	wM3	0.224226	0.174982	2	2.85615	R
XLOC_005998	Bra033949	dM3	0.00725001	0.0036379	0	3.88011	wM3	0.318627	0.256819	3	2.18227	R
XLOC_010698	Bra022937	dM3	0.000421201	0.000122629	2	1.45368	wM3	0.355768	0.290281	4	0.4897	R
XLOC_040386	Bra027966	dM3	0.00124721	0.000459966	0	1.74691	wM6	0.355768	0.290281	0	1.01442	R
XLOC_000066	Bra011778	dM3	0.00101527	0.000356905	0	2.13401	wM4	0.396903	0.327235	0	1.28e-15	R
XLOC_044196	Bra008752_U5	dM3	0.003423	0.00151876	0	2.95243	wM4	0.396903	0.327235	3	0.551565	R
XLOC_014685	Bra001196	dM3	0.00417337	0.00190181	2	1.88699	wM3	0.396903	0.327235	4	0.123708	R
XLOC_016838	Bra030317	dM3	0.00503389	0.00237097	2	6.15812	wM4	0.396903	0.327235	2	0.704703	R
XLOC_008298	Bra022601	dM3	0.00606981	0.00294312	2	2.68715	wM9	0.490306	0.412622	2	0.669701	R
XLOC_042610	Bra026864	dM3	0.00417337	0.00190181	0	2.06545	wM15	0.875121	0.779026	0	1.18902	R
XLOC_028474	Bra012474	dM3	0.00725001	0.0036379	2	1.11822	wM4	0.95537	0.858799	2	0.052538	R
XLOC_011766	Bra001688	dM3	0.00153479	0.000589779	4	0.44897	wM5	1	1	NA	0.953449	R
XLOC_021845	Bra005095	dM3	0.00153479	0.000589779	2	1.44318	wM3	1	1	NA	0.0535421	R
XLOC_042555	Bra026770	dM3	0.00280851	0.00120739	2	2.82991	wM4	1	1	NA	0.416957	R
XLOC_031454	Bra004292_Bra004293	dM3	0.00725001	0.0036379	2	1.8208	wM5	1	1	NA	0.201596	R
XLOC_037641	Bra024755_Bra024756	dM3	0.00870082	0.00447811	0	1.58687	wM3	1	1	NA	0	R
XLOC_041669	Bra007004	dM4	1.27e-05	1.29e-06	10	252.049	wM1	8.51e-06	8.78e-07	10	373.465	A
XLOC_002610	Bra011477	dM4	0.00153479	0.000589779	10	58.3024	wM1	0.00278927	0.00120739	11	129.819	A
XLOC_013485	Bra006567	dM4	1.66e-05	1.88e-06	12	159.555	wM1	2.07e-06	1.1e-07	12	218.277	A
XLOC_029406	Bra004225	dM4	2.17e-05	2.71e-06	10	88.9788	wM1	0.000640495	0.000211519	11	141.091	A
XLOC_047072	Bra039999	dM4	0.000526591	0.000161509	10	68.0117	wM1	0.00122491	0.000459966	12	114.84	A
XLOC_017059	Bra034364	dM4	0.00101527	0.000356905	12	37.6068	wM14	0.00122491	0.000459966	12	79.167	A
XLOC_019841	Bra005180	dM4	0.000658514	0.000211519	12	63.8015	wM1	0.000987752	0.000356905	11	103.402	A
XLOC_031707	Bra015923_Bra015924	dM4	0.00870082	0.00447811	10	8.64438	wM1	0.000120338	2.83e-05	10	44.4996	A
XLOC_017903	Bra014559	dM4	2.33e-06	1.1e-07	10	150.884	wM1	5.62e-05	1.08e-05	10	183.545	A
XLOC_004908	Bra040120	dM4	6.13e-05	1.08e-05	12	27.7762	wM1	7.32e-05	1.5e-05	12	58.062	A
XLOC_013478	Bra006553	dM4	0.000207844	5.18e-05	12	19.8386	wM1	4.35e-05	7.75e-06	12	46.9074	A
XLOC_021708	Bra004806	dM4	0.000526591	0.000161509	12	4.18148	wM1	0.000987752	0.000356905	12	27.9611	A
XLOC_018696	Bra034356	dM4	0.00124721	0.000459966	12	6.59709	wM1	0.000322366	9.26e-05	12	29.0163	A
XLOC_039830	Bra037787	dM4	0.00153479	0.000589779	14	6.77868	wM8	0.00040536	0.000122629	12	29.0496	A
XLOC_028752	Bra012004	dM4	4.77e-05	7.75e-06	10	65.7908	wM1	0.00122491	0.000459966	12	88.0117	A
XLOC_009836	Bra005677	dM4	5.45e-06	3.95e-07	12	23.6659	wM1	4.38e-08	1.91e-10	10	45.3634	A
XLOC_009965	Bra005923	dM4	0.00101527	0.000356905	12	55.0192	wM1	4.35e-05	7.75e-06	12	76	A
XLOC_001000	Bra038503	dM4	6.13e-05	1.08e-05	10	72.7966	wM1	1.47e-05	1.88e-06	12	93.3805	A
XLOC_017872	Bra014503	dM4	0.00870082	0.00447811	12	53.2854	wM14	0.00412171	0.00190181	12	73.0858	A
XLOC_031559	Bra016199	dM4	0.00417337	0.00190181	11	29.439	wM1	0.00726063	0.0036379	10	48.3979	A
XLOC_006527	Bra033172	dM4	3.66e-05	5.5e-06	12	25.4558	wM1	3.67e-06	2.61e-07	12	43.9365	A
XLOC_042918	Bra032507	dM4	0.000421201	0.000122629	10	42.1185	wM1	0.00122491	0.000459966	12	59.0707	A
XLOC_020763	Bra035803_Bra035804	dM4	7.89e-05	1.5e-05	12	43.8106	wM1	3.32e-05	5.5e-06	12	60.3233	A
XLOC_003255	Bra013915	dM4	0.00230246	0.000955433	12	33.7936	wM1	4.35e-05	7.75e-06	12	50.2336	A
XLOC_011438	Bra001104	dM4	7.89e-05	1.5e-05	12	40.1886	wM1	0.000640495	0.000211519	12	56.0128	A
XLOC_027302	Bra009940	dM4	0.000207844	5.18e-05	12	17.5376	wM1	1.11e-05	1.29e-06	12	32.3211	A
XLOC_023799	Bra018689	dM4	0.003423	0.00151876	10	38.4496	wM1	0.000198087	5.18e-05	10	52.6059	A
XLOC_033526	Bra016556	dM4	0.000129226	2.83e-05	12	61.7629	wM1	7.32e-05	1.5e-05	12	75.6279	A
XLOC_036366	Bra036709_Bra036710	dM4	0.000100996	2.07e-05	12	40.4493	wM1	1.11e-05	1.29e-06	12	54.3079	A
XLOC_045062	Bra003045	dM4	0.00153479	0.000589779	14	3.07386	wM1	4.35e-05	7.75e-06	14	16.0211	A
XLOC_030407	Bra030045_snoR74	dM4	0.000263727	6.95e-05	10	20.1669	wM1	0.000120338	2.83e-05	10	32.8567	A
XLOC_007047	Bra020572	dM4	0.000129226	2.83e-05	12	20.5923	wM1	0.000511887	0.000161509	12	33.2348	A
XLOC_030576	Bra012238_Bra012239	dM4	1.27e-05	1.29e-06	10	422.796	wM1	3.67e-06	2.61e-07	10	435.307	A
XLOC_014163	Bra000242	dM4	0.000164103	3.84e-05	12	27.2279	wM1	0.00040536	0.000122629	12	39.3668	A
XLOC_041723	Bra007070	dM4	0.000129226	2.83e-05	12	16.7875	wM1	0.000987752	0.000356905	12	28.5512	A
XLOC_008243	Bra022709	dM4	4.77e-05	7.75e-06	14	1.91011	wM1	0.000253031	6.95e-05	14	12.4166	A
XLOC_039502	Bra037409	dM4	0.00153479	0.000589779	12	59.375	wM8	0.00868696	0.00447811	14	49.1369	A
XLOC_021810	Bra005026	dM4	4.07e-06	2.61e-07	12	46.7771	wM1	1.2e-06	4.44e-08	14	36.5038	A
XLOC_029517	Bra016269	dM4	2.85e-05	3.88e-06	10	80.659	wM1	0.000322366	9.26e-05	10	70.1139	A
XLOC_016456	Bra014858	dM4	4.77e-05	7.75e-06	10	105.816	wM1	5.62e-05	1.08e-05	11	95.1469	A
XLOC_008436	Bra033975	dM4	0.000421201	0.000122629	12	26.2026	wM1	0.000322366	9.26e-05	12	15.3766	A
XLOC_017303	Bra021852_Bra021853	dM4	0.000820427	0.000275495	12	109.733	wM1	0.000120338	2.83e-05	14	98.3197	A
XLOC_012990	Bra005668	dM4	1.24e-07	1.18e-09	10	68.8652	wM1	3.59e-07	6.14e-09	12	57.361	A
XLOC_014017	Bra023108	dM4	3.66e-05	5.5e-06	12	53.5532	wM1	1.11e-05	1.29e-06	12	41.6262	A
XLOC_014026	Bra000009	dM4	1.66e-05	1.88e-06	10	73.4366	wM1	9.34e-05	2.07e-05	10	61.1577	A
XLOC_017345	Bra021937	dM4	0.000100996	2.07e-05	12	90.8399	wM1	8.51e-06	8.78e-07	12	78.4733	A
XLOC_039870	Bra037213_Bra037214	dM4	0.00503389	0.00237097	14	31.6165	wM8	0.0033966	0.00151876	14	19.2371	A
XLOC_043232	Bra015299	dM4	0.000658514	0.000211519	10	91.6714	wM1	0.000198087	5.18e-05	11	78.3184	A
XLOC_016004	Bra017625	dM4	0.000658514	0.000211519	14	36.4308	wM1	0.00602704	0.00294312	14	22.8608	A
XLOC_010435	Bra006857	dM4	0.000207844	5.18e-05	14	37.8243	wM1	6.46e-06	5.92e-07	14	24.1073	A
XLOC_030847	Bra003226	dM4	0.000333867	9.26e-05	12	27.1134	wM1	0.00040536	0.000122629	12	13.1146	A
XLOC_021992	Bra005386	dM4	1.27e-05	1.29e-06	10	58.3386	wM1	3.67e-06	2.61e-07	12	44.2277	A
XLOC_025090	Bra009998	dM4	2.33e-06	1.1e-07	12	36.7147	wM1	2.54e-05	3.88e-06	12	22.2724	A
XLOC_035518	Bra016648	dM4	0.00153479	0.000589779	10	28.484	wM1	1.94e-05	2.71e-06	10	13.8032	A
XLOC_003068	Bra013576	dM4	0.00230246	0.000955433	14	49.7645	wM1	0.00499771	0.00237097	14	34.5666	A
XLOC_000292	Bra011339	dM4	9.57e-07	2.77e-08	10	68.0438	wM1	9.06e-07	2.77e-08	10	52.6165	A
XLOC_020310	Bra037058	dM4	0.000164103	3.84e-05	12	24.0978	wM1	8.51e-06	8.78e-07	12	8.48585	A
XLOC_032580	Bra035260_Bra035261	dM4	9.57e-07	2.77e-08	12	29.9371	wM1	3.32e-05	5.5e-06	12	14.11	A
XLOC_000189	Bra011546	dM4	0.00153479	0.000589779	12	80.5833	wM1	1.47e-05	1.88e-06	14	64.037	A
XLOC_013546	Bra006661	dM4	0.000421201	0.000122629	10	93.7213	wM1	0.000799029	0.000275495	12	75.379	A
XLOC_020282	Bra018532	dM4	4.07e-06	2.61e-07	10	61.1567	wM1	2.73e-06	1.71e-07	10	42.0566	A
XLOC_035719	Bra030676	dM4	0.00101527	0.000356905	14	32.6961	wM8	0.000198087	5.18e-05	14	13.2529	A
XLOC_032646	Bra021016_Bra021017	dM4	0.00124721	0.000459966	12	42.1257	wM1	0.00150923	0.000589779	14	22.313	A
XLOC_034056	Bra014208	dM4	1.75e-06	7.04e-08	10	181.635	wM1	3.59e-07	6.14e-09	12	161.358	A
XLOC_000880	Bra026426_Bra026427	dM4	0.00188574	0.000752483	12	170.067	wM1	0.000799029	0.000275495	10	147.588	A
XLOC_010103	Bra006196	dM4	1.84e-07	2.08e-09	12	32.2325	wM1	1.47e-05	1.88e-06	12	8.79075	A
XLOC_026636	Bra017976	dM4	0.00101527	0.000356905	12	46.1135	wM8	0.00412171	0.00190181	14	19.3931	A
XLOC_011190	Bra000692	dM4	0.00606981	0.00294312	12	56.7538	wM1	0.00868696	0.00447811	12	27.9562	A
XLOC_041645	Bra006969_Bra006970	dM4	3.15e-06	1.71e-07	10	107.592	wM14	0.00150923	0.000589779	12	69.5708	A
XLOC_014543	Bra000929	dM4	0.00124721	0.000459966	12	148.143	wM1	0.00015476	3.84e-05	12	87.759	A
XLOC_012482	Bra019231	dM4	0.00188574	0.000752483	14	142.025	wM1	0.00499771	0.00237097	14	80.9708	A
XLOC_011264	Bra000821	dM4	3.73e-07	6.14e-09	12	178.571	wM1	0.00015476	3.84e-05	12	112.652	A
XLOC_019854	Bra005211_Bra005212	dM4	0.000820427	0.000275495	12	332.89	wM1	0.00040536	0.000122629	12	253.209	A
XLOC_002376	Bra011902	dM4	0.000333867	9.26e-05	14	6.27713	wM1	0.0103934	0.00549005	14	0	R
XLOC_044140	Bra008654	dM4	0.000333867	9.26e-05	13	4.42145	wM1	0.0103934	0.00549005	13	2.68798	R
XLOC_034915	Bra010438	dM4	0.00101527	0.000356905	14	2.46837	wM1	0.0103934	0.00549005	12	1.65675	R
XLOC_028308	Bra014955	dM4	0.00153479	0.000589779	14	1.81166	wM12	0.0103934	0.00549005	15	0.869356	R
XLOC_045915	Bra009001	dM4	0.00153479	0.000589779	12	1.54665	wM1	0.0103934	0.00549005	12	0.478853	R
XLOC_021076	Bra027407	dM4	0.00606981	0.00294312	12	0.921445	wM1	0.0103934	0.00549005	12	1.22315	R
XLOC_016715	Bra025605	dM4	0.00725001	0.0036379	11	1.72866	wM1	0.0103934	0.00549005	12	3.8442	R
XLOC_014137	Bra000198	dM4	0.00503389	0.00237097	12	4.34952	wM1	0.0124242	0.00670393	10	2.07933	R
XLOC_001461	Bra028335	dM4	0.000658514	0.000211519	12	1.84899	wM1	0.0147373	0.00815436	12	0.111157	R
XLOC_009992	Bra005979	dM4	0.00124721	0.000459966	12	2.65953	wM8	0.0147373	0.00815436	13	4.47254	R
XLOC_036143	Bra037754	dM4	0.00124721	0.000459966	12	1.92684	wM1	0.0147373	0.00815436	12	0.679445	R
XLOC_043499	Bra002979	dM4	0.00124721	0.000459966	12	17.4568	wM1	0.0147373	0.00815436	12	16.703	R
XLOC_003407	Bra026290	dM4	0.000164103	3.84e-05	12	12.4978	wM14	0.0173944	0.00988072	13	18.6205	R
XLOC_044213	Bra008778_Bra008779	dM4	0.000164103	3.84e-05	12	4.19682	wM1	0.0173944	0.00988072	12	1.34951	R
XLOC_043211	Bra015335_Bra015336	dM4	0.000333867	9.26e-05	14	21.9183	wM14	0.0173944	0.00988072	14	11.9969	R
XLOC_023171	Bra034717	dM4	0.00124721	0.000459966	12	50.9352	wM14	0.0173944	0.00988072	13	56.0929	R
XLOC_042759	Bra031705	dM4	0.00188574	0.000752483	14	1.36703	wM8	0.0173944	0.00988072	14	1.3691	R
XLOC_020724	Bra035744	dM4	0.00280851	0.00120739	12	4.69979	wM1	0.0173944	0.00988072	12	2.30088	R
XLOC_044757	Bra015508	dM4	0.003423	0.00151876	10	0.855599	wM1	0.0173944	0.00988072	10	1.58547	R
XLOC_046467	Bra035338	dM4	0.00606981	0.00294312	14	8.54581	wM8	0.0173944	0.00988072	14	3.47988	R
XLOC_022247	Bra018435	dM4	0.00725001	0.0036379	14	2.27879	wM8	0.0173944	0.00988072	14	2.89942	R
XLOC_007896	Bra023704	dM4	4.77e-05	7.75e-06	12	2.99591	wM1	0.0204803	0.0119277	10	1.80673	R
XLOC_024474	Bra018030	dM4	6.13e-05	1.08e-05	12	5.45335	wM1	0.0204803	0.0119277	12	7.18802	R
XLOC_033750	Bra030715_Bra030716_Bra030717	dM4	0.000164103	3.84e-05	10	13.6499	wM1	0.0204803	0.0119277	9	10.4028	R
XLOC_033615	Bra016703	dM4	0.000207844	5.18e-05	12	9.56475	wM8	0.0204803	0.0119277	12	13.0531	R
XLOC_032060	Bra030922	dM4	0.000421201	0.000122629	12	5.34382	wM1	0.0204803	0.0119277	14	3.32284	R
XLOC_046516	Bra035352	dM4	0.000421201	0.000122629	12	2.30029	wM1	0.0204803	0.0119277	14	0.876218	R
XLOC_022706	Bra031261	dM4	0.000526591	0.000161509	14	8.48832	wM8	0.0204803	0.0119277	14	5.64476	R
XLOC_024975	Bra009782	dM4	0.00124721	0.000459966	12	7.44385	wM14	0.0204803	0.0119277	12	7.88657	R
XLOC_010076	Bra006138	dM4	0.00230246	0.000955433	14	20.883	wM8	0.0204803	0.0119277	16	5.75712	R
XLOC_005920	Bra039740	dM4	0.00417337	0.00190181	14	5.94097	wM1	0.0204803	0.0119277	10	2.89058	R
XLOC_018977	Bra021900	dM4	0.00725001	0.0036379	12	0.409882	wM1	0.0204803	0.0119277	12	1.1273	R
XLOC_037745	Bra024631	dM4	0.00725001	0.0036379	14	2.65363	wM1	0.0204803	0.0119277	12	4.36094	R
XLOC_045488	Bra002258	dM4	0.000129226	2.83e-05	12	9.53336	wM1	0.0241241	0.0143459	12	8.4903	R
XLOC_012642	Bra024163	dM4	0.000263727	6.95e-05	12	1.30439	wM1	0.0241241	0.0143459	12	1.54668	R
XLOC_020475	Bra032254	dM4	0.000820427	0.000275495	12	1.57748	wM1	0.0241241	0.0143459	12	1.25e-15	R
XLOC_025907	Bra018897	dM4	0.000820427	0.000275495	14	2.76111	wM7	0.0241241	0.0143459	16	2.16643	R
XLOC_042944	Bra032547	dM4	0.00101527	0.000356905	14	4.18252	wM1	0.0241241	0.0143459	14	1.57925	R
XLOC_015155	Bra013211	dM4	2.17e-05	2.71e-06	14	2.38154	wM1	0.0282411	0.0171921	14	3.06729	R
XLOC_012640	Bra024164	dM4	0.000421201	0.000122629	12	7.12416	wM1	0.0282411	0.0171921	10	0	R
XLOC_008847	Bra008421	dM4	0.00124721	0.000459966	12	10.0638	wM1	0.0282411	0.0171921	13	6.04697	R
XLOC_016566	Bra032713	dM4	0.00153479	0.000589779	13	5.26837	wM12	0.0282411	0.0171921	16	7.99349	R
XLOC_042520	Bra026722	dM4	0.00230246	0.000955433	12	2.65644	wM1	0.0282411	0.0171921	12	2.51294	R
XLOC_047837	Bra041070	dM4	0.00280851	0.00120739	12	1.8781	wM1	0.0282411	0.0171921	14	3.07483	R
XLOC_017361	Bra017320	dM4	0.00503389	0.00237097	14	22.4728	wM14	0.0282411	0.0171921	14	16.3947	R
XLOC_038559	Bra007751	dM4	0.00725001	0.0036379	12	7.62282	wM1	0.0282411	0.0171921	14	3.33655	R
XLOC_044827	Bra015367	dM4	4.77e-05	7.75e-06	12	22.68	wM8	0.0329852	0.0205299	14	19.8054	R
XLOC_023974	Bra019837	dM4	0.000263727	6.95e-05	12	2.73106	wM1	0.0329852	0.0205299	8	5.35857	R
XLOC_024923	Bra009670	dM4	0.000421201	0.000122629	12	16.6768	wM8	0.0329852	0.0205299	14	13.2389	R
XLOC_025464	Bra024794	dM4	0.00188574	0.000752483	12	7.93883	wM1	0.0329852	0.0205299	14	5.79615	R
XLOC_007760	Bra023465	dM4	0.00230246	0.000955433	14	3.06121	wM1	0.0329852	0.0205299	14	2.19691	R
XLOC_028003	Bra033583	dM4	0.00230246	0.000955433	10	7.94541	wM1	0.0329852	0.0205299	11	6.2865	R
XLOC_045314	Bra002610	dM4	0.00417337	0.00190181	12	3.40715	wM1	0.0329852	0.0205299	14	3.5565	R
XLOC_037982	Bra006952_Bra006954	dM4	0.00606981	0.00294312	14	4.26499	wM8	0.0329852	0.0205299	16	3.3514	R
XLOC_007852	Bra023634	dM4	0.000207844	5.18e-05	14	17.078	wM8	0.0385429	0.0244305	14	11.4828	R
XLOC_013449	Bra006491	dM4	0.00230246	0.000955433	14	7.49767	wM1	0.0385429	0.0244305	12	1.71389	R
XLOC_039815	Bra037757	dM4	0.00230246	0.000955433	14	4.19583	wM8	0.0385429	0.0244305	14	2.54806	R
XLOC_042823	Bra031603	dM4	0.00124721	0.000459966	12	95.7203	wM1	0.0447399	0.0289726	12	72.5994	R
XLOC_035983	Bra036539	dM4	0.00188574	0.000752483	12	38.6582	wM1	0.0447399	0.0289726	12	26.0654	R
XLOC_011772	Bra001702_Bra001703_Bra001704	dM4	0.00417337	0.00190181	14	2.69104	wM8	0.0447399	0.0289726	14	0.841245	R
XLOC_021510	Bra004450	dM4	0.00230246	0.000955433	14	4.92472	wM1	0.0519391	0.0342436	14	2.74485	R
XLOC_001250	Bra029923	dM4	0.00417337	0.00190181	14	2.04941	wM12	0.0519391	0.0342436	14	1.02891	R
XLOC_003058	Bra013558	dM4	0.00725001	0.0036379	14	5.71151	wM8	0.0519391	0.0342436	14	5.50426	R
XLOC_012623	Bra024196	dM4	0.00870082	0.00447811	10	1.54637	wM1	0.0519391	0.0342436	11	0.660579	R
XLOC_038305	Bra007413	dM4	0.00725001	0.0036379	12	6.45624	wM8	0.0601243	0.0403398	14	6.14674	R
XLOC_008354	Bra022503	dM4	0.00870082	0.00447811	14	3.11311	wM1	0.0601243	0.0403398	12	7.56187	R
XLOC_013996	Bra023072	dM4	0.000421201	0.000122629	12	17.6234	wM1	0.0693755	0.0473666	12	0.779939	R
XLOC_007886	Bra023685	dM4	0.000526591	0.000161509	14	3.17364	wM8	0.0693755	0.0473666	14	3.32439	R
XLOC_004570	Bra021419_Bra021420	dM4	0.000658514	0.000211519	14	1.67655	wM8	0.0693755	0.0473666	14	1.45226	R
XLOC_037736	Bra024640_Bra024641	dM4	0.00101527	0.000356905	14	2.29013	wM1	0.0693755	0.0473666	14	0.121198	R
XLOC_026332	Bra026179	dM4	0.00188574	0.000752483	12	2.63857	wM1	0.0693755	0.0473666	8	1.9642	R
XLOC_019847	Bra005189_Bra005190	dM4	0.00417337	0.00190181	12	1.92276	wM1	0.0693755	0.0473666	10	1.1511	R
XLOC_011045	Bra000440	dM4	0.003423	0.00151876	12	67.2253	wM14	0.0800484	0.0554394	12	49.267	R
XLOC_003008	Bra013462	dM4	0.00503389	0.00237097	10	2.10831	wM1	0.0800484	0.0554394	12	1.91591	R
XLOC_007494	Bra028579	dM4	0.00870082	0.00447811	14	2.88907	wM1	0.0800484	0.0554394	13	2.67247	R
XLOC_027348	Bra010015	dM4	0.00188574	0.000752483	14	2.85943	wM12	0.0918294	0.0646837	14	1.0415	R
XLOC_008079	Bra020322	dM4	0.00725001	0.0036379	12	2.32877	wM1	0.0918294	0.0646837	12	0	R
XLOC_045363	Bra002518	dM4	0.00124721	0.000459966	14	1.83503	wM7	0.10502	0.0752356	16	0	R
XLOC_044281	Bra008911_Bra008912	dM4	0.00188574	0.000752483	10	1.35559	wM1	0.10502	0.0752356	12	1.28898	R
XLOC_008907	Bra008544	dM4	0.003423	0.00151876	14	56.997	wM1	0.10502	0.0752356	12	34.4665	R
XLOC_019558	Bra004679	dM4	0.00503389	0.00237097	14	3.2501	wM1	0.10502	0.0752356	14	1.69005	R
XLOC_027496	Bra037476	dM4	0.00606981	0.00294312	12	4.1744	wM7	0.10502	0.0752356	18	2.56326	R
XLOC_019929	Bra005339	dM4	0.00725001	0.0036379	12	12.515	wM1	0.10502	0.0752356	10	9.97098	R
XLOC_042008	Bra007499_Bra007500	dM4	0.00417337	0.00190181	12	2.70369	wM8	0.120193	0.0872416	14	2.84328	R
XLOC_025254	Bra037464_Bra037465	dM4	0.00417337	0.00190181	12	1.15135	wM1	0.155156	0.116257	14	0.843663	R
XLOC_008762	Bra008284	dM4	0.00503389	0.00237097	12	23.2893	wM14	0.155156	0.116257	12	6.94732	R
XLOC_044884	Bra015244	dM4	0.000526591	0.000161509	14	2.46066	wM1	0.175784	0.133615	14	1.39096	R
XLOC_011560	Bra001340	dM4	0.003423	0.00151876	12	5.8948	wM1	0.175784	0.133615	10	5.05949	R
XLOC_041908	Bra007343	dM4	0.000526591	0.000161509	13	5.77558	wM8	0.198669	0.153123	13	5.23846	R
XLOC_026669	Bra018042	dM4	0.00870082	0.00447811	12	4.37225	wM1	0.198669	0.153123	10	1.56645	R
XLOC_022496	Bra032216	dM4	0.00101527	0.000356905	12	1.31204	wM1	0.224226	0.174982	12	1.7409	R
XLOC_021488	Bra004410_Bra004412	dM4	2.85e-05	3.88e-06	14	5.43928	wM8	0.284122	0.226605	14	2.35332	R
XLOC_002083	Bra038703	dM4	0.00188574	0.000752483	12	1.22642	wM1	0.284122	0.226605	8	2.06182	R
XLOC_032909	Bra010281	dM4	0.00230246	0.000955433	14	246.489	wM14	0.318627	0.256819	15	46.1203	R
XLOC_000070	Bra011770	dM4	0.00503389	0.00237097	12	12.4017	wM1	0.318627	0.256819	12	6.90461	R
XLOC_007396	Bra031806_Bra031807	dM4	0.00870082	0.00447811	10	8.4676	wM1	0.441589	0.36793	12	17.7776	R
XLOC_020318	Bra037068	dM4	0.000421201	0.000122629	10	3.50972	wM1	0.542604	0.461566	11	0.531638	R
XLOC_003205	Bra013829	dM4	0.00606981	0.00294312	11	3.0355	wM1	0.660684	0.573241	11	2.07338	R
XLOC_020010	Bra005476	dM4	0.00153479	0.000589779	14	3.30956	wM1	1	1	NA	0.123084	R
XLOC_044848	Bra015317	dM4	0.00725001	0.0036379	14	6.19327	wM1	1	1	NA	0	R
XLOC_014754	Bra001312_Bra001313	dM4	0.00870082	0.00447811	14	1.59092	wM1	1	1	NA	0.318669	R
XLOC_027605	Bra025296	dM5	1.05e-08	2.52e-11	4	1108.95	wM3	4.67e-09	2.55e-12	4	1344	A
XLOC_030312	Bra030182	dM5	9.63e-06	8.78e-07	2	1290.6	wM3	2.54e-05	3.88e-06	2	1502.77	A
XLOC_046332	Bra034519	dM5	0.00503389	0.00237097	3	91.5689	wM3	0.000799029	0.000275495	2	145.896	A
XLOC_028185	Bra015164	dM5	0.000421201	0.000122629	2	38.403	wM3	0.000198087	5.18e-05	2	78.1459	A
XLOC_035126	Bra010775	dM5	0.000164103	3.84e-05	2	80.3733	wM3	1.11e-05	1.29e-06	2	116.154	A
XLOC_017829	Bra014433	dM5	1.66e-05	1.88e-06	4	323.791	wM3	6.7e-07	1.7e-08	4	358.312	A
XLOC_020608	Bra033911	dM5	0.00230246	0.000955433	2	6.41688	wM3	2.56e-07	3.6e-09	4	40.8463	A
XLOC_000667	Bra013653	dM5	2.33e-06	1.1e-07	4	71.5309	wM3	3.67e-06	2.61e-07	4	102.191	A
XLOC_008395	Bra039756	dM5	0.000164103	3.84e-05	2	23.9426	wM3	9.34e-05	2.07e-05	2	48.458	A
XLOC_023001	Bra027203	dM5	1.66e-05	1.88e-06	2	29.8017	wM3	2.07e-06	1.1e-07	2	51.6513	A
XLOC_003588	Bra036883	dM5	0.000421201	0.000122629	4	16.0374	wM3	5.01e-07	1.03e-08	4	30.4887	A
XLOC_035332	Bra016345	dM5	2.17e-05	2.71e-06	2	36.7621	wM3	0.00228097	0.000955433	2	50.1501	A
XLOC_028087	Bra039018_Bra039019	dM5	0.000333867	9.26e-05	2	24.0783	wM3	9.34e-05	2.07e-05	4	37.2328	A
XLOC_000185	Bra011556_Bra011557_Bra011558	dM5	0.00725001	0.0036379	2	10.9835	wM3	0.000799029	0.000275495	2	23.3069	A
XLOC_004951	Bra028409	dM5	7.33e-06	5.92e-07	4	52.114	wM3	4.86e-06	3.95e-07	4	63.5088	A
XLOC_046706	Bra038168_Bra038169	dM5	5.19e-07	1.03e-08	4	23.0672	wM3	1.85e-07	2.08e-09	4	34.2028	A
XLOC_018202	Bra028132	dM5	5.19e-07	1.03e-08	6	40.5295	wM5	1.47e-05	1.88e-06	6	30.2162	A
XLOC_017888	Bra014534	dM5	0.00606981	0.00294312	4	43.6712	wM3	9.34e-05	2.07e-05	4	32.8122	A
XLOC_031437	Bra004252	dM5	2.85e-05	3.88e-06	5	88.2802	wM3	2.73e-06	1.71e-07	4	76.2685	A
XLOC_025925	Bra018872	dM5	0.000129226	2.83e-05	4	41.7337	wM3	3.32e-05	5.5e-06	6	22.3602	A
XLOC_004952	Bra028411	dM5	0.003423	0.00151876	4	41.5927	wM3	2.07e-06	1.1e-07	4	20.3972	A
XLOC_028990	Bra003451	dM5	0.000129226	2.83e-05	4	186.696	wM3	8.51e-06	8.78e-07	4	165.042	A
XLOC_025875	Bra018955	dM5	6.13e-05	1.08e-05	2	395.865	wM3	9.03e-08	6.57e-10	2	372.199	A
XLOC_000434	Bra011057	dM5	0.000820427	0.000275495	2	496.085	wM3	0.000799029	0.000275495	3	472.259	A
XLOC_035950	Bra039070	dM5	7.05e-07	1.7e-08	4	2648.22	wM3	3.32e-08	9.97e-11	4	2620.44	A
XLOC_028944	Bra003389	dM5	0.000658514	0.000211519	6	93.7518	wM3	0.000640495	0.000211519	4	64.4372	A
XLOC_034169	Bra014024	dM5	0.00101527	0.000356905	4	190.551	wM3	0.000253031	6.95e-05	4	160.419	A
XLOC_014962	Bra001661	dM5	2.33e-06	1.1e-07	6	131.178	wM5	4.86e-06	3.95e-07	8	100.145	A
XLOC_026377	Bra026098_Bra026099	dM5	4.07e-06	2.61e-07	6	823.188	wM3	6.7e-07	1.7e-08	6	791.22	A
XLOC_046296	Bra034466	dM5	0.00725001	0.0036379	2	86.074	wM3	0.000799029	0.000275495	4	50.6065	A
XLOC_015165	Bra013183	dM5	3.53e-09	5.65e-12	4	1498.22	wM3	4.38e-08	1.91e-10	4	1462.29	A
XLOC_016541	Bra032749	dM5	0.000820427	0.000275495	5	111.325	wM5	9.34e-05	2.07e-05	6	74.3595	A
XLOC_028693	Bra012127	dM5	2.56e-07	3.6e-09	4	289.343	wM3	5.01e-07	1.03e-08	4	250.657	A
XLOC_009984	Bra005964	dM5	7.05e-07	1.7e-08	4	188.399	wM3	6.7e-07	1.7e-08	4	148.925	A
XLOC_035560	Bra016720	dM5	1.27e-05	1.29e-06	6	110.033	wM5	3.67e-06	2.61e-07	6	66.2925	A
XLOC_028949	Bra003396	dM5	3.15e-06	1.71e-07	4	112.325	wM3	1.6e-06	7.04e-08	4	66.2432	A
XLOC_018832	Bra021650	dM5	0.00503389	0.00237097	5	96.3044	wM3	9.34e-05	2.07e-05	4	49.7697	A
XLOC_022011	Bra005424	dM5	1.05e-08	2.52e-11	4	910.893	wM3	5.18e-09	5.65e-12	4	859.128	A
XLOC_018183	Bra032672	dM5	0.00188574	0.000752483	6	389.39	wM3	8.51e-06	8.78e-07	4	333.274	A
XLOC_020338	Bra037103_Bra037104	dM5	0.00503389	0.00237097	4	357.287	wM3	0.00602704	0.00294312	4	291.547	A
XLOC_032016	Bra030843	dM5	0.000263727	6.95e-05	2	386.01	wM3	2.54e-05	3.88e-06	4	318.658	A
XLOC_007529	Bra028906	dM5	4.07e-06	2.61e-07	6	536.898	wM3	3.82e-10	6.95e-14	6	464.26	A
XLOC_042871	Bra031532_Bra031533_Bra032413_tRNA-Ala	dM5	0.000421201	0.000122629	4	221.636	wM3	1.94e-05	2.71e-06	4	146.594	A
XLOC_039186	Bra031623	dM5	7.05e-07	1.7e-08	4	1888.65	wM3	1.31e-07	1.18e-09	4	1803.83	A
XLOC_041216	Bra032383	dM5	3.66e-05	5.5e-06	2	1223.12	wM3	0.000198087	5.18e-05	4	1135.07	A
XLOC_005701	Bra020448	dM5	7.33e-06	5.92e-07	6	310.336	wM3	1.94e-05	2.71e-06	6	209.799	A
XLOC_044751	Bra015520	dM5	4.77e-05	7.75e-06	2	399.925	wM3	0.000120338	2.83e-05	2	284.264	A
XLOC_030831	Bra003198	dM5	6.1e-08	3.58e-10	4	972.594	wM3	1.31e-07	1.18e-09	4	855.107	A
XLOC_041752	Bra007110	dM5	2.39e-09	2.55e-12	4	1185.23	wM3	1.85e-07	2.08e-09	4	1049.15	A
XLOC_028331	Bra014908	dM5	1.29e-06	4.44e-08	4	678.341	wM3	9.03e-08	6.57e-10	4	539.805	A
XLOC_035830	Bra036240	dM5	1.66e-05	1.88e-06	2	1175.35	wM3	4.86e-06	3.95e-07	2	1010.27	A
XLOC_043488	Bra002999	dM5	7.42e-10	4.62e-13	4	1046.16	wM3	2.56e-07	3.6e-09	4	874.747	A
XLOC_036825	Bra037914	dM5	6.1e-08	3.58e-10	4	1547.81	wM3	3.82e-10	6.95e-14	4	1363.46	A
XLOC_001406	Bra031426	dM5	3.53e-09	5.65e-12	4	1009.78	wM3	7.84e-09	1.21e-11	4	776.113	A
XLOC_036226	Bra037164	dM5	4.77e-05	7.75e-06	4	493.872	wM3	2.54e-05	3.88e-06	4	259.713	A
XLOC_035144	Bra010808	dM5	5.19e-07	1.03e-08	2	1087.23	wM3	6.46e-06	5.92e-07	2	852.721	A
XLOC_040238	Bra027083	dM5	2.17e-05	2.71e-06	2	1745.42	wM3	8.51e-06	8.78e-07	4	1436.35	A
XLOC_032346	Bra034911	dM5	1.73e-08	5.08e-11	4	1055.6	wM3	9.03e-08	6.57e-10	4	552.922	A
XLOC_024538	Bra018144	dM5	2.8e-08	9.97e-11	4	2572.82	wM3	6.46e-08	3.58e-10	4	1823.64	A
XLOC_037594	Bra032344	dM5	2.85e-05	3.88e-06	3	3144.3	wM3	1.47e-05	1.88e-06	4	2305.22	A
XLOC_013942	Bra022976	dM5	2.56e-07	3.6e-09	4	6726.53	wM3	1.85e-07	2.08e-09	4	5561.53	A
XLOC_002487	Bra011674	dM5	0.000333867	9.26e-05	4	4.72715	wM3	0.0103934	0.00549005	4	4.16033	R
XLOC_006358	Bra008343	dM5	0.00503389	0.00237097	5	1.44618	wM5	0.0103934	0.00549005	6	1.26119	R
XLOC_006333	Bra008303	dM5	0.00230246	0.000955433	6	9.2928	wM11	0.0124242	0.00670393	6	9.73364	R
XLOC_011908	Bra001935	dM5	0.00606981	0.00294312	6	3.03681	wM3	0.0124242	0.00670393	5	1.58774	R
XLOC_031086	Bra003665_Bra003666	dM5	0.000820427	0.000275495	6	1.95292	wM3	0.0147373	0.00815436	6	0.413261	R
XLOC_011967	Bra013163	dM5	0.00153479	0.000589779	6	17.348	wM5	0.0147373	0.00815436	5	10.9276	R
XLOC_012544	Bra019118	dM5	0.000421201	0.000122629	2	0.551536	wM3	0.0173944	0.00988072	2	1.16856	R
XLOC_025370	Bra025259_Bra025260	dM5	0.000526591	0.000161509	6	7.72931	wM5	0.0173944	0.00988072	6	6.90787	R
XLOC_031583	Bra016160_Bra016161	dM5	0.000526591	0.000161509	4	2.1279	wM3	0.0173944	0.00988072	2	2.29081	R
XLOC_042516	Bra026716	dM5	0.00101527	0.000356905	2	2.43945	wM3	0.0173944	0.00988072	4	3.4218	R
XLOC_013061	Bra005806	dM5	0.00153479	0.000589779	4	4.10652	wM3	0.0173944	0.00988072	4	3.10222	R
XLOC_011664	Bra001531	dM5	0.003423	0.00151876	4	0.908844	wM3	0.0173944	0.00988072	4	0.854539	R
XLOC_031081	Bra003663	dM5	0.00417337	0.00190181	4	3.65567	wM3	0.0173944	0.00988072	2	6.35477	R
XLOC_043330	Bra033356	dM5	0.00101527	0.000356905	6	1.30532	wM5	0.0204803	0.0119277	6	1.49598	R
XLOC_030933	Bra003355	dM5	0.00153479	0.000589779	4	4.43349	wM5	0.0204803	0.0119277	4	4.62745	R
XLOC_003405	Bra026294	dM5	0.003423	0.00151876	4	23.1288	wM9	0.0204803	0.0119277	2	17.235	R
XLOC_030959	Bra003407	dM5	0.003423	0.00151876	4	1.92078	wM3	0.0204803	0.0119277	6	2.49389	R
XLOC_007920	Bra020067	dM5	0.000263727	6.95e-05	6	7.76997	wM5	0.0241241	0.0143459	4	3.91476	R
XLOC_045092	Bra002995	dM5	0.000421201	0.000122629	6	1.12685	wM3	0.0241241	0.0143459	4	1.30744	R
XLOC_035715	Bra030681	dM5	0.00101527	0.000356905	2	1.46626	wM3	0.0241241	0.0143459	4	3.66155	R
XLOC_008183	Bra035608	dM5	0.00280851	0.00120739	6	0.648629	wM5	0.0241241	0.0143459	7	0.492111	R
XLOC_039460	Bra036262_Bra036263	dM5	0.00280851	0.00120739	4	2.89857	wM3	0.0241241	0.0143459	4	3.18792	R
XLOC_041592	Bra006886	dM5	0.00280851	0.00120739	6	9.09014	wM3	0.0241241	0.0143459	4	0	R
XLOC_043430	Bra003085	dM5	0.003423	0.00151876	2	1.411	wM4	0.0241241	0.0143459	1	3.00834	R
XLOC_011011	Bra000384	dM5	0.00870082	0.00447811	4	6.14737	wM3	0.0241241	0.0143459	6	3.39814	R
XLOC_021131	Bra034744_Bra034745	dM5	0.00870082	0.00447811	4	5.73209	wM5	0.0241241	0.0143459	6	3.41469	R
XLOC_003557	Bra040694_Bra040695	dM5	0.00503389	0.00237097	4	1.91073	wM3	0.0282411	0.0171921	2	1.9227	R
XLOC_014376	Bra000636	dM5	0.00725001	0.0036379	4	1.28651	wM5	0.0282411	0.0171921	6	2.72328	R
XLOC_036479	Bra027703	dM5	0.00870082	0.00447811	3	1.78764	wM3	0.0282411	0.0171921	3	1.81044	R
XLOC_008796	Bra008348	dM5	0.000421201	0.000122629	2	5.91813	wM3	0.0329852	0.0205299	4	5.77558	R
XLOC_003893	Bra031481	dM5	0.00606981	0.00294312	5	1.43918	wM5	0.0329852	0.0205299	6	0.584912	R
XLOC_008028	Bra020237	dM5	0.00606981	0.00294312	4	10.4348	wM5	0.0329852	0.0205299	4	8.29853	R
XLOC_014276	Bra000457	dM5	0.00725001	0.0036379	6	1.29584	wM11	0.0329852	0.0205299	8	0.75915	R
XLOC_006248	Bra008182	dM5	6.13e-05	1.08e-05	4	2.22762	wM5	0.0385429	0.0244305	6	1.26544	R
XLOC_004954	Bra028414_Bra028415	dM5	7.89e-05	1.5e-05	4	10.4457	wM3	0.0385429	0.0244305	6	4.98319	R
XLOC_032957	Bra010351	dM5	0.00606981	0.00294312	2	430.105	wM6	0.0385429	0.0244305	2	1012.77	R
XLOC_035109	Bra010751	dM5	0.000820427	0.000275495	4	21.7081	wM9	0.0447399	0.0289726	2	12.7825	R
XLOC_023915	Bra019950	dM5	0.00280851	0.00120739	2	0	wM3	0.0447399	0.0289726	3	1.9007	R
XLOC_026059	Bra018629	dM5	0.000100996	2.07e-05	2	287.361	wM6	0.0519391	0.0342436	2	159.028	R
XLOC_045802	Bra008785	dM5	0.00153479	0.000589779	2	6.58677	wM3	0.0519391	0.0342436	4	8.1009	R
XLOC_004013	Bra028297	dM5	0.00280851	0.00120739	4	0.963857	wM3	0.0519391	0.0342436	5	2.58334	R
XLOC_011047	Bra000443	dM5	0.00280851	0.00120739	6	3.6491	wM3	0.0519391	0.0342436	4	0.856589	R
XLOC_029678	Bra015968_Bra015969	dM5	0.00606981	0.00294312	4	1.38076	wM3	0.0519391	0.0342436	6	1.40525	R
XLOC_000594	Bra013510	dM5	1.66e-05	1.88e-06	4	1.21762	wM3	0.0601243	0.0403398	4	1.38512	R
XLOC_045446	Bra002354	dM5	0.000100996	2.07e-05	4	16.89	wM9	0.0601243	0.0403398	2	12.3494	R
XLOC_038557	Bra007744	dM5	0.00124721	0.000459966	6	2.36201	wM3	0.0601243	0.0403398	6	1.77583	R
XLOC_046050	Bra009274	dM5	2.17e-05	2.71e-06	6	1.63833	wM5	0.0693755	0.0473666	6	0.768017	R
XLOC_022237	Bra018407	dM5	4.77e-05	7.75e-06	6	1.51179	wM5	0.0693755	0.0473666	6	0.768696	R
XLOC_021529	Bra004475	dM5	0.000820427	0.000275495	4	18.7841	wM3	0.0693755	0.0473666	5	19.2086	R
XLOC_008374	Bra039735	dM5	0.00503389	0.00237097	6	2.37553	wM3	0.0693755	0.0473666	6	1.87369	R
XLOC_015231	Bra013069	dM5	0.00153479	0.000589779	4	1.79867	wM3	0.0800484	0.0554394	6	1.32356	R
XLOC_021738	Bra004887	dM5	0.00417337	0.00190181	4	2.76274	wM11	0.0800484	0.0554394	8	8.70597	R
XLOC_035249	Bra010956_Bra010957	dM5	0.00503389	0.00237097	5	6.1263	wM3	0.0800484	0.0554394	6	0.00523259	R
XLOC_011126	Bra000574	dM5	0.000333867	9.26e-05	2	8.79358	wM6	0.0866995	0.0600616	2	18.4498	R
XLOC_001166	Bra037621	dM5	0.00606981	0.00294312	5	1.3293	wM1	0.0918294	0.0646837	10	1.39467	R
XLOC_017320	Bra021883	dM5	0.00870082	0.00447811	6	2.44716	wM16	0.0918294	0.0646837	5	3.02179	R
XLOC_022649	Bra031351	dM5	0.00870082	0.00447811	2	12.5486	wM4	0.10502	0.0752356	1	6.25532	R
XLOC_030029	Bra038825	dM5	0.00417337	0.00190181	6	9.4782	wM3	0.136948	0.100859	2	5.83618	R
XLOC_034271	Bra039861	dM5	0.000263727	6.95e-05	3	2.51497	wM4	0.175784	0.133615	2	1.81097	R
XLOC_003081	Bra013598	dM5	0.00725001	0.0036379	4	2.12146	wM3	0.224226	0.174982	4	0.962867	R
XLOC_031171	Bra003804	dM5	4.77e-05	7.75e-06	4	1.81543	wM3	0.318627	0.256819	1	0.749321	R
XLOC_041890	Bra007315_Bra007316	dM5	0.00503389	0.00237097	4	2.26774	wM11	0.660684	0.573241	10	0.508014	R
XLOC_023734	Bra018818	dM5	0.00870082	0.00447811	2	0.838098	wM3	0.875121	0.779026	8	0	R
XLOC_011234	Bra000766	dM5	0.00188574	0.000752483	4	1.00423	wM6	1	1	NA	0.167914	R
XLOC_044518	Bra009335	dM5	0.00725001	0.0036379	4	1.24246	wM9	1	1	NA	0	R
XLOC_023129	Bra027403	dM6	0.000100996	2.07e-05	18	28.4545	wM7	1.94e-05	2.71e-06	18	59.011	A
XLOC_000636	Bra013588	dM6	0.00101527	0.000356905	18	11.5099	wM2	0.0033966	0.00151876	20	25.1147	A
XLOC_025012	Bra009841_Bra009842	dM6	0.00230246	0.000955433	18	0	wM7	0.00228097	0.000955433	18	12.1884	A
XLOC_021667	Bra004710	dM6	1.27e-05	1.29e-06	18	32.2231	wM2	1.47e-05	1.88e-06	20	44.0861	A
XLOC_024481	Bra018046	dM6	0.000333867	9.26e-05	18	33.024	wM7	0.000511887	0.000161509	18	43.4321	A
XLOC_024007	Bra019785_Bra019786	dM6	0.000658514	0.000211519	18	25.4725	wM7	0.00412171	0.00190181	18	12.5936	A
XLOC_022332	Bra039503	dM6	6.13e-05	1.08e-05	17	41.9262	wM7	2.54e-05	3.88e-06	18	28.8541	A
XLOC_020046	Bra005542	dM6	0.00230246	0.000955433	20	36.3174	wM10	0.0033966	0.00151876	22	18.0898	A
XLOC_002450	Bra011773_Bra011774	dM6	3.66e-05	5.5e-06	18	29.8041	wM7	3.32e-05	5.5e-06	18	9.18454	A
XLOC_047453	Bra040746	dM6	0.000129226	2.83e-05	20	77.3638	wM2	7.32e-05	1.5e-05	20	53.742	A
XLOC_002616	Bra011460	dM6	0.000421201	0.000122629	17	185.258	wM7	0.00122491	0.000459966	18	161.383	A
XLOC_039737	Bra036119	dM6	0.000333867	9.26e-05	18	1.51576	wM2	0.0103934	0.00549005	18	0	R
XLOC_021323	Bra029697	dM6	0.00101527	0.000356905	18	5.50278	wM9	0.0103934	0.00549005	22	6.24156	R
XLOC_000193	Bra011537	dM6	0.003423	0.00151876	18	8.05359	wM7	0.0103934	0.00549005	16	6.27388	R
XLOC_026378	Bra026095	dM6	0.003423	0.00151876	20	4.53793	wM10	0.0103934	0.00549005	20	4.56685	R
XLOC_033579	Bra016643	dM6	0.003423	0.00151876	16	7.76731	wM10	0.0103934	0.00549005	20	3.98474	R
XLOC_000502	Bra013341_tRNA-Glu	dM6	0.000526591	0.000161509	16	2.56849	wM7	0.0124242	0.00670393	18	0	R
XLOC_006560	Bra021961	dM6	1.66e-05	1.88e-06	20	8.09312	wM10	0.0147373	0.00815436	20	6.68796	R
XLOC_040846	Bra017581	dM6	0.000820427	0.000275495	16	2.52714	wM7	0.0147373	0.00815436	18	0.291872	R
XLOC_027476	Bra037517_Bra037518	dM6	0.00124721	0.000459966	20	1.38048	wM10	0.0147373	0.00815436	18	1.77802	R
XLOC_007675	Bra023317	dM6	0.00188574	0.000752483	18	23.8859	wM2	0.0147373	0.00815436	19	27.1203	R
XLOC_025453	Bra024779	dM6	0.003423	0.00151876	18	3.57895	wM7	0.0147373	0.00815436	18	1.25618	R
XLOC_029535	Bra016236	dM6	0.00725001	0.0036379	18	6.65635	wM7	0.0147373	0.00815436	19	2.36089	R
XLOC_035350	Bra016373	dM6	0.00725001	0.0036379	20	212.054	wM6	0.0147373	0.00815436	21	352.392	R
XLOC_004201	Bra038247_Bra038248	dM6	7.89e-05	1.5e-05	18	1.3539	wM7	0.0173944	0.00988072	18	1.51413	R
XLOC_039603	Bra036522	dM6	0.00188574	0.000752483	18	8.16355	wM7	0.0173944	0.00988072	18	8.50451	R
XLOC_017560	Bra016973	dM6	0.00230246	0.000955433	18	1.43472	wM10	0.0173944	0.00988072	20	1.63561	R
XLOC_007523	Bra028915	dM6	0.00870082	0.00447811	20	3.43592	wM10	0.0173944	0.00988072	20	1.80393	R
XLOC_010371	Bra006738	dM6	2.85e-05	3.88e-06	18	2.21904	wM7	0.0204803	0.0119277	18	0.449791	R
XLOC_026361	Bra026134	dM6	0.000263727	6.95e-05	20	7.37934	wM6	0.0204803	0.0119277	20	8.36335	R
XLOC_008861	Bra008448_Bra008449_Bra008450	dM6	0.000526591	0.000161509	18	4.72291	wM2	0.0204803	0.0119277	20	9.91738	R
XLOC_025248	Bra037479	dM6	0.00280851	0.00120739	18	2.20709	wM6	0.0204803	0.0119277	21	36.4993	R
XLOC_034382	Bra035536	dM6	0.003423	0.00151876	18	6.89773	wM7	0.0204803	0.0119277	19	2.18044	R
XLOC_025165	Bra010116	dM6	0.000333867	9.26e-05	18	15.1952	wM10	0.0241241	0.0143459	20	11.735	R
XLOC_016585	Bra032687	dM6	0.000658514	0.000211519	19	4.13015	wM7	0.0241241	0.0143459	18	0.968984	R
XLOC_011171	Bra000662	dM6	0.003423	0.00151876	16	2.14409	wM2	0.0241241	0.0143459	18	0.399657	R
XLOC_042627	Bra026889	dM6	0.00503389	0.00237097	18	2.20106	wM12	0.0282411	0.0171921	18	1.75745	R
XLOC_026524	Bra025757	dM6	0.00280851	0.00120739	18	0.990105	wM2	0.0329852	0.0205299	21	1.60938	R
XLOC_022624	Bra031382	dM6	0.00725001	0.0036379	19	1.54719	wM10	0.0329852	0.0205299	18	1.83469	R
XLOC_025655	Bra025105	dM6	0.00870082	0.00447811	18	8.4997	wM12	0.0329852	0.0205299	16	2.6939	R
XLOC_034050	Bra014216	dM6	0.00870082	0.00447811	18	6.47377	wM7	0.0329852	0.0205299	18	3.98101	R
XLOC_033412	Bra016356	dM6	0.000333867	9.26e-05	18	22.7731	wM6	0.0385429	0.0244305	20	52.8789	R
XLOC_001730	Bra021314	dM6	0.003423	0.00151876	18	9.13405	wM2	0.0693755	0.0473666	23	8.91432	R
XLOC_032153	Bra014288	dM6	0.00503389	0.00237097	18	1.68454	wM2	0.0693755	0.0473666	18	0.618577	R
XLOC_029149	Bra003733_Bra003734_tRNA-Glu	dM6	0.00606981	0.00294312	18	0.809779	wM2	0.0800484	0.0554394	20	2.22142	R
XLOC_047416	Bra040716	dM6	0.00725001	0.0036379	18	2.56581	wM2	0.0918294	0.0646837	22	3.23602	R
XLOC_023047	Bra027264	dM6	6.13e-05	1.08e-05	18	4.80875	wM6	0.10502	0.0752356	19	1.55093	R
XLOC_016992	Bra032034	dM6	0.00230246	0.000955433	18	1.64933	wM7	0.10502	0.0752356	16	1.52556	R
XLOC_032045	Bra030890	dM6	0.00280851	0.00120739	18	6.02059	wM2	0.10502	0.0752356	18	7.50163	R
XLOC_004947	Bra028401	dM6	0.00870082	0.00447811	18	1.49086	wM7	0.175784	0.133615	16	2.02528	R
XLOC_038192	Bra007250	dM6	0.00725001	0.0036379	16	6.57447	wM7	0.198669	0.153123	18	2.74888	R
XLOC_001246	Bra029917	dM6	0.00870082	0.00447811	19	5.50493	wM7	0.318627	0.256819	16	2.0615	R
XLOC_004246	Bra037560	dM6	0.00280851	0.00120739	18	18.6028	wM6	0.441589	0.36793	20	18.6558	R
XLOC_013307	Bra006221	dM6	0.003423	0.00151876	20	4.02301	wM10	0.441589	0.36793	20	1.63028	R
XLOC_019553	Bra004671	dM6	0.00188574	0.000752483	18	2.09332	wM8	0.490306	0.412622	18	0.995182	R
XLOC_041901	Bra007333	dM6	0.00153479	0.000589779	18	2.93072	wM10	0.542604	0.461566	18	0.911842	R
XLOC_033807	Bra030622	dM6	0.000100996	2.07e-05	18	4.54005	wM10	1	1	NA	0.0783003	R
XLOC_033887	Bra030818	dM6	0.00503389	0.00237097	18	0.699986	wM10	1	1	NA	0.0279661	R
XLOC_019928	Bra005337	dM7	0.000100996	2.07e-05	15	45.2089	wM8	1.11e-05	1.29e-06	16	32.7192	A
XLOC_004929	Bra040514	dM7	5.45e-06	3.95e-07	14	32.7404	wM1	0.000987752	0.000356905	14	19.9201	A
XLOC_041583	Bra006873	dM7	6.13e-05	1.08e-05	14	105.674	wM1	6.46e-06	5.92e-07	14	91.8397	A
XLOC_027707	Bra025141_Bra025142	dM7	0.000263727	6.95e-05	16	39.8199	wM8	2.54e-05	3.88e-06	18	22.4612	A
XLOC_021119	Bra034729_Bra034731	dM7	0.00124721	0.000459966	14	70.4724	wM8	0.000987752	0.000356905	16	52.1809	A
XLOC_047012	Bra039648	dM7	0.000207844	5.18e-05	12	58.9359	wM1	0.00015476	3.84e-05	12	40.1212	A
XLOC_047174	Bra040406	dM7	0.000421201	0.000122629	15	36.6865	wM8	0.00150923	0.000589779	16	16.6283	A
XLOC_023794	Bra018700	dM7	6.13e-05	1.08e-05	14	69.9965	wM8	2.54e-05	3.88e-06	16	43.6992	A
XLOC_029845	Bra015639	dM7	3.15e-06	1.71e-07	14	107.928	wM8	0.000799029	0.000275495	14	80.2375	A
XLOC_020823	Bra022379	dM7	0.000263727	6.95e-05	16	76.0396	wM12	9.34e-05	2.07e-05	16	46.1158	A
XLOC_009691	Bra032012	dM7	0.000263727	6.95e-05	14	61.2847	wM1	0.000322366	9.26e-05	14	30.996	A
XLOC_015694	Bra019210	dM7	4.77e-05	7.75e-06	16	84.7977	wM8	0.00150923	0.000589779	16	37.2327	A
XLOC_038418	Bra007555_Bra007556	dM7	6.13e-05	1.08e-05	16	129.518	wM8	3.32e-05	5.5e-06	16	78.9548	A
XLOC_042153	Bra007732	dM7	0.00188574	0.000752483	14	143.519	wM1	0.00412171	0.00190181	14	73.5165	A
XLOC_020698	Bra031272	dM7	2.85e-05	3.88e-06	14	5.36406	wM8	0.0103934	0.00549005	13	3.98129	R
XLOC_036539	Bra027017	dM7	0.000421201	0.000122629	14	151.061	wM8	0.0103934	0.00549005	14	165.303	R
XLOC_010531	Bra029090	dM7	0.000526591	0.000161509	16	2.89356	wM1	0.0103934	0.00549005	14	0	R
XLOC_017809	Bra014402	dM7	0.00230246	0.000955433	14	2.78025	wM8	0.0103934	0.00549005	14	1.96554	R
XLOC_021387	Bra029588_Bra029589	dM7	0.00230246	0.000955433	12	34.4867	wM1	0.0103934	0.00549005	12	15.6341	R
XLOC_033216	Bra010786	dM7	0.00417337	0.00190181	14	8.70583	wM8	0.0103934	0.00549005	14	19.6067	R
XLOC_028799	Bra011919	dM7	0.000421201	0.000122629	14	70.9905	wM8	0.0124242	0.00670393	16	40.5568	R
XLOC_002009	Bra021386	dM7	0.00124721	0.000459966	14	5.32597	wM12	0.0124242	0.00670393	16	1.9775	R
XLOC_011533	Bra001291	dM7	0.00124721	0.000459966	17	13.1781	wM7	0.0124242	0.00670393	18	6.69192	R
XLOC_035005	Bra010567	dM7	0.00124721	0.000459966	14	10.8061	wM8	0.0124242	0.00670393	14	8.38947	R
XLOC_045974	Bra009121	dM7	0.00153479	0.000589779	15	1.73298	wM1	0.0124242	0.00670393	14	2.19302	R
XLOC_036907	Bra032803	dM7	0.00280851	0.00120739	16	4.42543	wM1	0.0124242	0.00670393	14	4.17334	R
XLOC_029593	Bra016123	dM7	0.003423	0.00151876	14	6.02809	wM8	0.0124242	0.00670393	14	4.12215	R
XLOC_035585	Bra016758	dM7	2.17e-05	2.71e-06	14	2.68712	wM8	0.0147373	0.00815436	14	2.21134	R
XLOC_036062	Bra036143	dM7	0.000164103	3.84e-05	16	4.36827	wM12	0.0147373	0.00815436	16	3.6023	R
XLOC_045576	Bra002113	dM7	0.00124721	0.000459966	14	77.008	wM8	0.0147373	0.00815436	14	54.2323	R
XLOC_027670	Bra025178_Bra025179_Bra025180_Bra025181	dM7	0.00230246	0.000955433	16	2.83437	wM12	0.0147373	0.00815436	17	1.81458	R
XLOC_033783	Bra030664_Bra030665_Bra030666_tRNA-Gly	dM7	0.00280851	0.00120739	16	1.6151	wM8	0.0147373	0.00815436	18	3.13008	R
XLOC_024138	Bra026135	dM7	0.00503389	0.00237097	16	4.25374	wM8	0.0147373	0.00815436	14	7.73999	R
XLOC_006790	Bra026671	dM7	0.000164103	3.84e-05	16	2.54905	wM8	0.0173944	0.00988072	16	4.11451	R
XLOC_017681	Bra037669	dM7	0.000263727	6.95e-05	16	8.24699	wM2	0.0173944	0.00988072	18	8.11044	R
XLOC_040861	Bra029577	dM7	0.000333867	9.26e-05	14	0.888897	wM8	0.0173944	0.00988072	16	0.0738927	R
XLOC_019339	Bra037671	dM7	0.000421201	0.000122629	14	3.15466	wM8	0.0173944	0.00988072	14	3.06299	R
XLOC_020754	Bra035785_Bra035786	dM7	0.00153479	0.000589779	14	46.0574	wM7	0.0173944	0.00988072	16	17.8608	R
XLOC_000958	Bra026275	dM7	0.000333867	9.26e-05	14	2.26004	wM8	0.0204803	0.0119277	14	1.34345	R
XLOC_011518	Bra001264	dM7	0.000820427	0.000275495	14	17.5971	wM8	0.0204803	0.0119277	16	6.01479	R
XLOC_025936	Bra018845	dM7	0.003423	0.00151876	14	2.22675	wM1	0.0204803	0.0119277	14	3.1904	R
XLOC_036139	Bra035836	dM7	0.00503389	0.00237097	14	22.9267	wM8	0.0204803	0.0119277	14	9.76309	R
XLOC_014923	Bra001600	dM7	0.00870082	0.00447811	16	13.7686	wM12	0.0225528	0.0131368	16	2.60907	R
XLOC_021730	Bra004865	dM7	1.75e-06	7.04e-08	14	5.89812	wM8	0.0241241	0.0143459	15	0.955726	R
XLOC_011143	Bra000610	dM7	6.13e-05	1.08e-05	16	1.52377	wM8	0.0241241	0.0143459	16	0.962104	R
XLOC_034952	Bra010500	dM7	0.000129226	2.83e-05	16	10.0053	wM1	0.0241241	0.0143459	14	3.25481	R
XLOC_002609	Bra011478	dM7	0.00280851	0.00120739	16	2.64139	wM8	0.0241241	0.0143459	16	2.14558	R
XLOC_027111	Bra009649	dM7	0.003423	0.00151876	16	1.63172	wM12	0.0241241	0.0143459	16	1.33713	R
XLOC_035573	Bra016740_Bra016741	dM7	0.003423	0.00151876	14	0.856738	wM7	0.0241241	0.0143459	20	0.591665	R
XLOC_031340	Bra004082	dM7	0.00417337	0.00190181	16	2.22795	wM8	0.0241241	0.0143459	14	3.17013	R
XLOC_012997	Bra005678	dM7	0.000658514	0.000211519	14	8.35256	wM8	0.0282411	0.0171921	14	4.30119	R
XLOC_016548	Bra032738	dM7	0.000820427	0.000275495	16	3.24288	wM8	0.0282411	0.0171921	16	2.48804	R
XLOC_029896	Bra035109	dM7	0.00230246	0.000955433	14	2.83069	wM7	0.0282411	0.0171921	16	1.72428	R
XLOC_047553	Bra040850	dM7	0.00230246	0.000955433	15	7.73172	wM8	0.0282411	0.0171921	17	6.54399	R
XLOC_015974	Bra037010_Bra037011	dM7	0.00606981	0.00294312	16	1.17493	wM8	0.0282411	0.0171921	16	1.84215	R
XLOC_013115	Bra005897	dM7	0.00870082	0.00447811	16	2.52218	wM12	0.0282411	0.0171921	16	1.71113	R
XLOC_033855	Bra030545_Bra030546_Bra030547	dM7	0.000100996	2.07e-05	16	8.36663	wM8	0.0329852	0.0205299	14	4.144	R
XLOC_041932	Bra007383	dM7	0.00101527	0.000356905	14	7.76736	wM8	0.0329852	0.0205299	16	7.30371	R
XLOC_032947	Bra010332_Bra010333	dM7	0.00417337	0.00190181	16	1.55487	wM8	0.0329852	0.0205299	18	3.49095	R
XLOC_024374	Bra025830	dM7	0.00503389	0.00237097	16	1.65958	wM13	0.0329852	0.0205299	18	4.79418	R
XLOC_025596	Bra025025	dM7	0.00503389	0.00237097	14	3.72723	wM8	0.0329852	0.0205299	15	2.13122	R
XLOC_008300	Bra022597	dM7	0.00606981	0.00294312	15	13.3137	wM8	0.0329852	0.0205299	16	10.4178	R
XLOC_002308	Bra040279_Bra040281	dM7	0.00870082	0.00447811	16	3.72151	wM12	0.0329852	0.0205299	16	2.78909	R
XLOC_008119	Bra020403	dM7	0.000820427	0.000275495	14	11.1924	wM8	0.0385429	0.0244305	16	2.92693	R
XLOC_021087	Bra027429_Bra027430	dM7	0.00153479	0.000589779	16	2.58101	wM8	0.0385429	0.0244305	19	1.73775	R
XLOC_022295	Bra018531	dM7	0.00230246	0.000955433	16	9.93697	wM8	0.0385429	0.0244305	16	0	R
XLOC_005626	Bra020323	dM7	0.00280851	0.00120739	14	2.75768	wM2	0.0385429	0.0244305	18	3.37018	R
XLOC_015317	Bra012918	dM7	0.000100996	2.07e-05	16	10.1438	wM12	0.0447399	0.0289726	16	4.40266	R
XLOC_017905	Bra014562	dM7	0.00280851	0.00120739	14	4.85061	wM8	0.0447399	0.0289726	14	4.29164	R
XLOC_004463	Bra021592	dM7	0.00417337	0.00190181	14	20.4669	wM8	0.0447399	0.0289726	13	17.4007	R
XLOC_024163	Bra026094_tRNA-Leu	dM7	2.17e-05	2.71e-06	16	2.43011	wM8	0.0519391	0.0342436	18	1.66764	R
XLOC_013247	Bra006124	dM7	6.13e-05	1.08e-05	18	7.63216	wM8	0.0519391	0.0342436	16	2.05676	R
XLOC_025230	Bra037501_Bra037502	dM7	0.00124721	0.000459966	16	29.3619	wM13	0.0519391	0.0342436	17	15.4807	R
XLOC_043823	Bra002435	dM7	0.00606981	0.00294312	16	1.68748	wM8	0.0519391	0.0342436	14	6.14453	R
XLOC_027552	Bra025392	dM7	0.00725001	0.0036379	16	3.09875	wM8	0.0519391	0.0342436	16	3.22469	R
XLOC_030108	Bra015170	dM7	0.000263727	6.95e-05	16	6.94973	wM10	0.0601243	0.0403398	18	0	R
XLOC_003841	Bra035434	dM7	0.00280851	0.00120739	14	2.28473	wM1	0.0601243	0.0403398	10	0.829153	R
XLOC_029136	Bra003710	dM7	0.00124721	0.000459966	16	17.4645	wM6	0.0693755	0.0473666	18	3.4301	R
XLOC_000386	Bra011148_Bra011150	dM7	0.00725001	0.0036379	16	2.09947	wM12	0.0693755	0.0473666	16	6.09194	R
XLOC_000711	Bra013747	dM7	0.00280851	0.00120739	14	6.85278	wM8	0.0800484	0.0554394	15	2.97936	R
XLOC_011402	Bra001035_Bra001036	dM7	0.00417337	0.00190181	14	2.60986	wM1	0.0800484	0.0554394	15	2.63673	R
XLOC_029889	Bra035101	dM7	0.00503389	0.00237097	16	0.960887	wM6	0.0800484	0.0554394	20	0.573322	R
XLOC_040425	Bra038389	dM7	0.00503389	0.00237097	14	22.605	wM8	0.0800484	0.0554394	14	17.7052	R
XLOC_033603	Bra016679_Bra016680_Bra016681_Bra016682	dM7	0.000421201	0.000122629	14	4.81151	wM8	0.0918294	0.0646837	14	2.58037	R
XLOC_010582	Bra029190_Bra029191	dM7	0.000820427	0.000275495	16	2.111	wM8	0.0918294	0.0646837	15	1.69048	R
XLOC_019865	Bra005235	dM7	0.00230246	0.000955433	17	23.5311	wM13	0.0918294	0.0646837	18	10.0204	R
XLOC_015499	Bra012606	dM7	0.00725001	0.0036379	16	2.42106	wM8	0.0918294	0.0646837	15	1.28697	R
XLOC_000239	Bra011442	dM7	1.27e-05	1.29e-06	16	5.46721	wM7	0.10502	0.0752356	18	0.215809	R
XLOC_028927	Bra003365	dM7	0.00124721	0.000459966	14	1.58246	wM8	0.10502	0.0752356	16	0.130327	R
XLOC_008867	Bra008462_Bra008463_Bra008464	dM7	0.00153479	0.000589779	15	3.28858	wM1	0.10502	0.0752356	14	1.94073	R
XLOC_001377	Bra031484	dM7	0.00280851	0.00120739	16	2.80325	wM8	0.10502	0.0752356	16	0	R
XLOC_002802	Bra011105	dM7	0.00280851	0.00120739	16	1.8161	wM8	0.10502	0.0752356	16	0.541997	R
XLOC_027053	Bra024402	dM7	0.00606981	0.00294312	13	4.40417	wM1	0.10502	0.0752356	14	1.01029	R
XLOC_010257	Bra006482	dM7	1.75e-06	7.04e-08	14	7.1273	wM1	0.136948	0.100859	14	0.193252	R
XLOC_045205	Bra002804	dM7	0.00124721	0.000459966	16	21.448	wM6	0.136948	0.100859	16	17.124	R
XLOC_037059	Bra017354_Bra017355	dM7	0.003423	0.00151876	18	19.5006	wM13	0.136948	0.100859	18	3.82022	R
XLOC_010036	Bra006067	dM7	0.00725001	0.0036379	16	2.56814	wM6	0.136948	0.100859	18	2.21685	R
XLOC_035616	Bra016808	dM7	0.00725001	0.0036379	14	3.67499	wM8	0.136948	0.100859	16	0.341674	R
XLOC_016896	Bra030219	dM7	0.00280851	0.00120739	12	4.99684	wM8	0.155156	0.116257	14	0.0762261	R
XLOC_010283	Bra006529	dM7	0.00606981	0.00294312	16	0.604718	wM7	0.175784	0.133615	16	0	R
XLOC_023538	Bra039120	dM7	0.000421201	0.000122629	16	12.2605	wM6	0.198669	0.153123	20	11.5421	R
XLOC_020041	Bra005531	dM7	0.00101527	0.000356905	16	3.83167	wM9	0.198669	0.153123	18	1.14693	R
XLOC_030185	Bra015061	dM7	0.00188574	0.000752483	12	8.14637	wM1	0.224226	0.174982	12	5.9665	R
XLOC_016183	Bra014386	dM7	0.000207844	5.18e-05	16	1.23935	wM12	0.252664	0.199403	16	0.823355	R
XLOC_032028	Bra030858	dM7	0.00188574	0.000752483	14	171.371	wM8	0.252664	0.199403	16	34.5726	R
XLOC_029164	Bra003758	dM7	0.00124721	0.000459966	16	3.52677	wM8	0.284122	0.226605	18	0	R
XLOC_011329	Bra000919	dM7	0.00503389	0.00237097	14	1.44862	wM1	0.318627	0.256819	10	0.0866913	R
XLOC_031052	Bra003604	dM7	0.000129226	2.83e-05	16	3.66295	wM8	0.355768	0.290281	17	1.13208	R
XLOC_037515	Bra023169	dM7	0.00101527	0.000356905	14	1.39095	wM8	0.441589	0.36793	15	0.951801	R
XLOC_008064	Bra020297	dM7	0.000164103	3.84e-05	16	12.154	wM8	0.490306	0.412622	18	0	R
XLOC_020584	Bra033875_Bra033876	dM7	0.000820427	0.000275495	16	2.33366	wM13	0.490306	0.412622	17	0.0919946	R
XLOC_047091	Bra040201	dM7	0.000333867	9.26e-05	14	13.9087	wM1	0.542604	0.461566	14	1.68956	R
XLOC_015877	Bra024075	dM7	0.00503389	0.00237097	14	8.46096	wM1	0.660684	0.573241	18	1.39724	R
XLOC_021797	Bra005003	dM7	0.00188574	0.000752483	14	5.95412	wM12	0.727477	0.636484	18	0	R
XLOC_021666	Bra004708	dM7	0.00230246	0.000955433	14	3.34546	wM8	0.798814	0.704998	16	1.0049	R
XLOC_003128	Bra013675	dM7	0.000164103	3.84e-05	14	16.6693	wM1	1	1	NA	0	R
XLOC_012215	Bra012724	dM7	0.00101527	0.000356905	14	18.313	wM1	1	1	NA	1.2006	R
XLOC_021320	Bra029701	dM7	0.00153479	0.000589779	14	23.0411	wM6	1	1	NA	9.26362	R
XLOC_033841	Bra030576	dM7	0.003423	0.00151876	16	2.97579	wM4	1	1	NA	1.12239	R
XLOC_010043	Bra006076	dM7	0.00417337	0.00190181	16	0.585767	wM1	1	1	NA	0	R
XLOC_011568	Bra001350_Bra001351	dM7	0.00503389	0.00237097	16	1.17882	wM9	1	0.944541	20	0.342805	R
XLOC_033834	Bra030587	dM7	0.00503389	0.00237097	16	6.84154	wM10	1	1	NA	1.63917	R
XLOC_027188	Bra009758	dM7	0.00725001	0.0036379	16	0.00544472	wM8	1	1	NA	0	R
XLOC_027027	Bra024372	dM7	0.00870082	0.00447811	14	4.56402	wM6	1	1	NA	0.241053	R
XLOC_032197	Bra014214	dM8	7.89e-05	1.5e-05	18	158.777	wM2	0.000198087	5.18e-05	20	397.212	A
XLOC_005079	Bra028624	dM8	7.05e-07	1.7e-08	18	127.026	wM7	8.51e-06	8.78e-07	20	240.882	A
XLOC_008900	Bra008533	dM8	4.3e-08	1.91e-10	18	104.265	wM7	1.6e-06	7.04e-08	18	151.422	A
XLOC_024169	Bra026087	dM8	3.15e-06	1.71e-07	18	54.863	wM2	6.46e-08	3.58e-10	20	99.8901	A
XLOC_000229	Bra011457	dM8	0.00230246	0.000955433	18	25.1744	wM2	0.00602704	0.00294312	19	66.5568	A
XLOC_046145	Bra009459_Bra009460_Bra009461	dM8	0.000207844	5.18e-05	18	6.92116	wM2	0.00412171	0.00190181	18	46.4463	A
XLOC_001816	Bra021171	dM8	0.00101527	0.000356905	18	73.0873	wM7	0.00602704	0.00294312	18	103.341	A
XLOC_007464	Bra028524	dM8	0.000129226	2.83e-05	18	21.3044	wM10	7.32e-05	1.5e-05	18	50.4259	A
XLOC_026720	Bra018123	dM8	3.66e-05	5.5e-06	20	36.433	wM2	0.00412171	0.00190181	20	65.1399	A
XLOC_020956	Bra027181	dM8	0.00101527	0.000356905	18	63.4607	wM7	0.00228097	0.000955433	18	83.7087	A
XLOC_008973	Bra033195	dM8	1.24e-07	1.18e-09	18	22.8289	wM7	3.32e-05	5.5e-06	20	35.4775	A
XLOC_022921	Bra022247_Bra022248	dM8	2.85e-05	3.88e-06	16	9.68022	wM7	1.11e-05	1.29e-06	16	21.0772	A
XLOC_027974	Bra033640_Bra033641_Bra033642	dM8	0.000100996	2.07e-05	18	13.5119	wM2	0.000120338	2.83e-05	19	24.3619	A
XLOC_044096	Bra008569	dM8	1.24e-07	1.18e-09	18	146.329	wM7	2.07e-06	1.1e-07	20	157.166	A
XLOC_014158	Bra000234	dM8	0.00503389	0.00237097	20	37.6343	wM6	0.00228097	0.000955433	22	48.1455	A
XLOC_010118	Bra006227	dM8	4.07e-06	2.61e-07	16	20.5697	wM7	2.56e-07	3.6e-09	18	9.55245	A
XLOC_028035	Bra036480	dM8	0.000129226	2.83e-05	17	17.7966	wM7	0.000253031	6.95e-05	18	6.59745	A
XLOC_030325	Bra030155_Bra030156	dM8	0.000526591	0.000161509	18	52.9793	wM7	0.00040536	0.000122629	18	39.2473	A
XLOC_013816	Bra022748	dM8	3.15e-06	1.71e-07	16	45.2029	wM7	9.34e-05	2.07e-05	18	27.9215	A
XLOC_009199	Bra026649	dM8	7.05e-07	1.7e-08	16	72.6566	wM7	2.07e-06	1.1e-07	18	52.427	A
XLOC_031733	Bra015885_Bra015886	dM8	7.33e-06	5.92e-07	19	127.953	wM10	6.46e-06	5.92e-07	20	96.9776	A
XLOC_047882	Bra041108	dM8	0.000526591	0.000161509	19	6.08458	wM2	0.0103934	0.00549005	22	6.1036	R
XLOC_036676	Bra027866	dM8	0.000820427	0.000275495	18	27.9958	wM2	0.0103934	0.00549005	18	12.3496	R
XLOC_040643	Bra027470	dM8	4.07e-06	2.61e-07	18	2.35905	wM10	0.0124242	0.00670393	20	1.39689	R
XLOC_015841	Bra024142	dM8	0.000207844	5.18e-05	18	42.0368	wM6	0.0124242	0.00670393	20	49.74	R
XLOC_025387	Bra025232_Bra025233	dM8	0.00417337	0.00190181	16	1.23447	wM7	0.0124242	0.00670393	18	3.58411	R
XLOC_047124	Bra040260	dM8	0.000263727	6.95e-05	16	5.55079	wM7	0.0147373	0.00815436	16	2.66968	R
XLOC_044835	Bra015342	dM8	0.000526591	0.000161509	16	1.60886	wM7	0.0147373	0.00815436	16	1.44669	R
XLOC_027515	Bra037439	dM8	0.00153479	0.000589779	18	1.80843	wM8	0.0147373	0.00815436	18	1.45848	R
XLOC_030455	Bra012444	dM8	0.00153479	0.000589779	18	4.39707	wM2	0.0147373	0.00815436	20	6.01698	R
XLOC_005671	Bra020400_Bra020401	dM8	4.77e-05	7.75e-06	16	6.10261	wM2	0.0173944	0.00988072	20	11.1697	R
XLOC_027548	Bra025404	dM8	0.000333867	9.26e-05	16	12.8816	wM7	0.0173944	0.00988072	18	3.76619	R
XLOC_047948	Bra041132	dM8	0.000421201	0.000122629	20	2.49813	wM2	0.0173944	0.00988072	20	1.65793	R
XLOC_043450	Bra003059	dM8	0.00124721	0.000459966	17	2.60696	wM9	0.0173944	0.00988072	22	2.10435	R
XLOC_034413	Bra038437	dM8	0.00503389	0.00237097	16	5.25402	wM7	0.0173944	0.00988072	18	11.3706	R
XLOC_032413	Bra039707	dM8	0.000658514	0.000211519	16	2.97678	wM2	0.0204803	0.0119277	18	2.60258	R
XLOC_039060	Bra026969	dM8	9.63e-06	8.78e-07	18	6.07617	wM10	0.0241241	0.0143459	20	4.1317	R
XLOC_046507	Bra035397	dM8	3.66e-05	5.5e-06	18	1.7409	wM7	0.0241241	0.0143459	18	2.00207	R
XLOC_025217	Bra037526	dM8	0.00153479	0.000589779	20	2.95762	wM2	0.0241241	0.0143459	20	1.98421	R
XLOC_013112	Bra005893	dM8	0.003423	0.00151876	16	7.76651	wM7	0.0241241	0.0143459	16	12.6149	R
XLOC_023932	Bra019915	dM8	0.000333867	9.26e-05	18	4.60022	wM6	0.0282411	0.0171921	20	5.89769	R
XLOC_046623	Bra036931	dM8	0.00124721	0.000459966	14	1.46307	wM7	0.0282411	0.0171921	16	1.76098	R
XLOC_013987	Bra023056_tRNA-Tyr	dM8	0.00188574	0.000752483	17	2.65144	wM10	0.0282411	0.0171921	20	0.904814	R
XLOC_015842	Bra024138_Bra024139	dM8	0.000263727	6.95e-05	18	1.80581	wM7	0.0329852	0.0205299	18	3.09649	R
XLOC_021135	Bra034751	dM8	0.000658514	0.000211519	16	2.18666	wM2	0.0329852	0.0205299	18	2.46964	R
XLOC_009717	Bra031966	dM8	0.003423	0.00151876	18	8.84803	wM10	0.0329852	0.0205299	19	7.52609	R
XLOC_039806	Bra035843	dM8	0.00870082	0.00447811	18	2.24018	wM10	0.0329852	0.0205299	18	1.80397	R
XLOC_032031	Bra030866	dM8	0.000207844	5.18e-05	18	2.50061	wM7	0.0385429	0.0244305	18	0	R
XLOC_003420	Bra026271	dM8	0.00101527	0.000356905	16	5.0206	wM7	0.0385429	0.0244305	16	1.23191	R
XLOC_034134	Bra014091	dM8	0.00101527	0.000356905	16	4.6039	wM7	0.0447399	0.0289726	18	0.678964	R
XLOC_021084	Bra027421_Bra027422	dM8	0.00188574	0.000752483	17	2.10852	wM7	0.0447399	0.0289726	18	0.568655	R
XLOC_008253	Bra022682	dM8	0.000207844	5.18e-05	16	1.43624	wM8	0.0519391	0.0342436	18	0.332482	R
XLOC_007720	Bra023388	dM8	0.00153479	0.000589779	17	2.76429	wM2	0.0519391	0.0342436	20	0.687237	R
XLOC_004684	Bra038666	dM8	0.00417337	0.00190181	16	12.5302	wM7	0.0519391	0.0342436	18	9.11602	R
XLOC_034637	Bra020847	dM8	0.00870082	0.00447811	16	1.91909	wM7	0.0519391	0.0342436	16	2.65773	R
XLOC_042405	Bra031084_Bra031085	dM8	0.003423	0.00151876	16	1.14905	wM7	0.0601243	0.0403398	18	0.429214	R
XLOC_030510	Bra012350	dM8	0.000658514	0.000211519	16	1.11076	wM7	0.0693755	0.0473666	18	0.981181	R
XLOC_015242	Bra013053	dM8	0.00153479	0.000589779	16	56.4066	wM6	0.0693755	0.0473666	18	27.1444	R
XLOC_007442	Bra028483	dM8	0.00124721	0.000459966	18	9.03951	wM10	0.0800484	0.0554394	18	10.0329	R
XLOC_017715	Bra040316_Bra040317_Bra040318_Bra040319	dM8	0.00230246	0.000955433	19	10.302	wM6	0.0800484	0.0554394	20	9.55619	R
XLOC_033982	Bra014342	dM8	0.003423	0.00151876	16	1.81677	wM7	0.0800484	0.0554394	16	5.19426	R
XLOC_030867	Bra003250_Bra003251	dM8	7.89e-05	1.5e-05	18	13.0588	wM1	0.10502	0.0752356	14	17.5039	R
XLOC_014478	Bra000820	dM8	0.00417337	0.00190181	16	2.30298	wM2	0.155156	0.116257	20	4.36363	R
XLOC_020172	Bra018353	dM8	0.00188574	0.000752483	16	6.1951	wM6	0.284122	0.226605	20	9.42969	R
XLOC_038425	Bra007566	dM8	0.00101527	0.000356905	16	2.02805	wM6	1	1	NA	0.471829	R
XLOC_031438	Bra004256_Bra004257	dM8	0.00417337	0.00190181	16	0.181444	wM6	1	1	NA	1.65984	R
XLOC_019294	Bra016866	dM9	0.000658514	0.000211519	4	5.88525	wM3	0.00015476	3.84e-05	2	56.7064	A
XLOC_000676	Bra013674	dM9	0.000526591	0.000161509	4	51.0977	wM11	0.00726063	0.0036379	4	63.5378	A
XLOC_011305	Bra000884	dM9	1.27e-05	1.29e-06	22	37.096	wM2	2.54e-05	3.88e-06	22	20.5299	A
XLOC_039018	Bra026903	dM9	0.00725001	0.0036379	2	3.80499	wM3	0.0103934	0.00549005	2	2.26865	R
XLOC_007406	Bra028399	dM9	0.00153479	0.000589779	22	2.57271	wM4	0.0124242	0.00670393	22	1.7281	R
XLOC_013515	Bra006611_Bra006612	dM9	0.000164103	3.84e-05	22	2.30798	wM2	0.0147373	0.00815436	20	1.66985	R
XLOC_019498	Bra004540	dM9	0.00188574	0.000752483	22	6.70333	wM2	0.0147373	0.00815436	20	4.23739	R
XLOC_007956	Bra020125	dM9	0.00124721	0.000459966	2	2.21155	wM3	0.0241241	0.0143459	0	1.43939	R
XLOC_005942	Bra034037_Bra034039_Bra034040	dM9	0.00503389	0.00237097	22	3.10745	wM15	0.0241241	0.0143459	22	8.91181	R
XLOC_014237	Bra000382	dM9	0.00725001	0.0036379	22	3.88291	wM15	0.0329852	0.0205299	20	5.38748	R
XLOC_030805	Bra003149	dM9	0.000263727	6.95e-05	22	3.34285	wM2	0.0447399	0.0289726	22	3.13404	R
XLOC_029745	Bra015843	dM9	0.000820427	0.000275495	0	3.27687	wM4	0.0519391	0.0342436	22	0.782767	R
XLOC_016367	Bra014692	dM9	0.00101527	0.000356905	0	4.90421	wM4	0.0519391	0.0342436	1	5.13331	R
XLOC_030859	Bra003239	dM9	0.00188574	0.000752483	2	14.0666	wM5	0.0519391	0.0342436	6	2.44e-15	R
XLOC_011255	Bra000796_Bra000797_Bra000798_Bra000799_Bra000800	dM9	0.00230246	0.000955433	22	0.984194	wM4	0.0519391	0.0342436	0	1.51386	R
XLOC_012042	Bra013034	dM9	0.000164103	3.84e-05	22	3.46365	wM4	0.10502	0.0752356	0	1.45545	R
XLOC_002481	Bra011703	dM9	0.00153479	0.000589779	0	5.79099	wM2	0.396903	0.327235	22	4.93935	R
XLOC_043414	Bra003114_Bra003115	dM9	0.00606981	0.00294312	22	6.58338	wM15	0.660684	0.573241	22	0.844073	R
XLOC_007325	Bra031899	dM9	0.00188574	0.000752483	0	2.52008	wM15	1	1	NA	0.0782013	R
