# Supplementary figures and images for: Temporal network analysis identifies early physiological and transcriptomic indicators of mild drought in Brassica rapa
Source: eLife journal article supplement (doi:10.7554/elife.29655), 2017-08-18

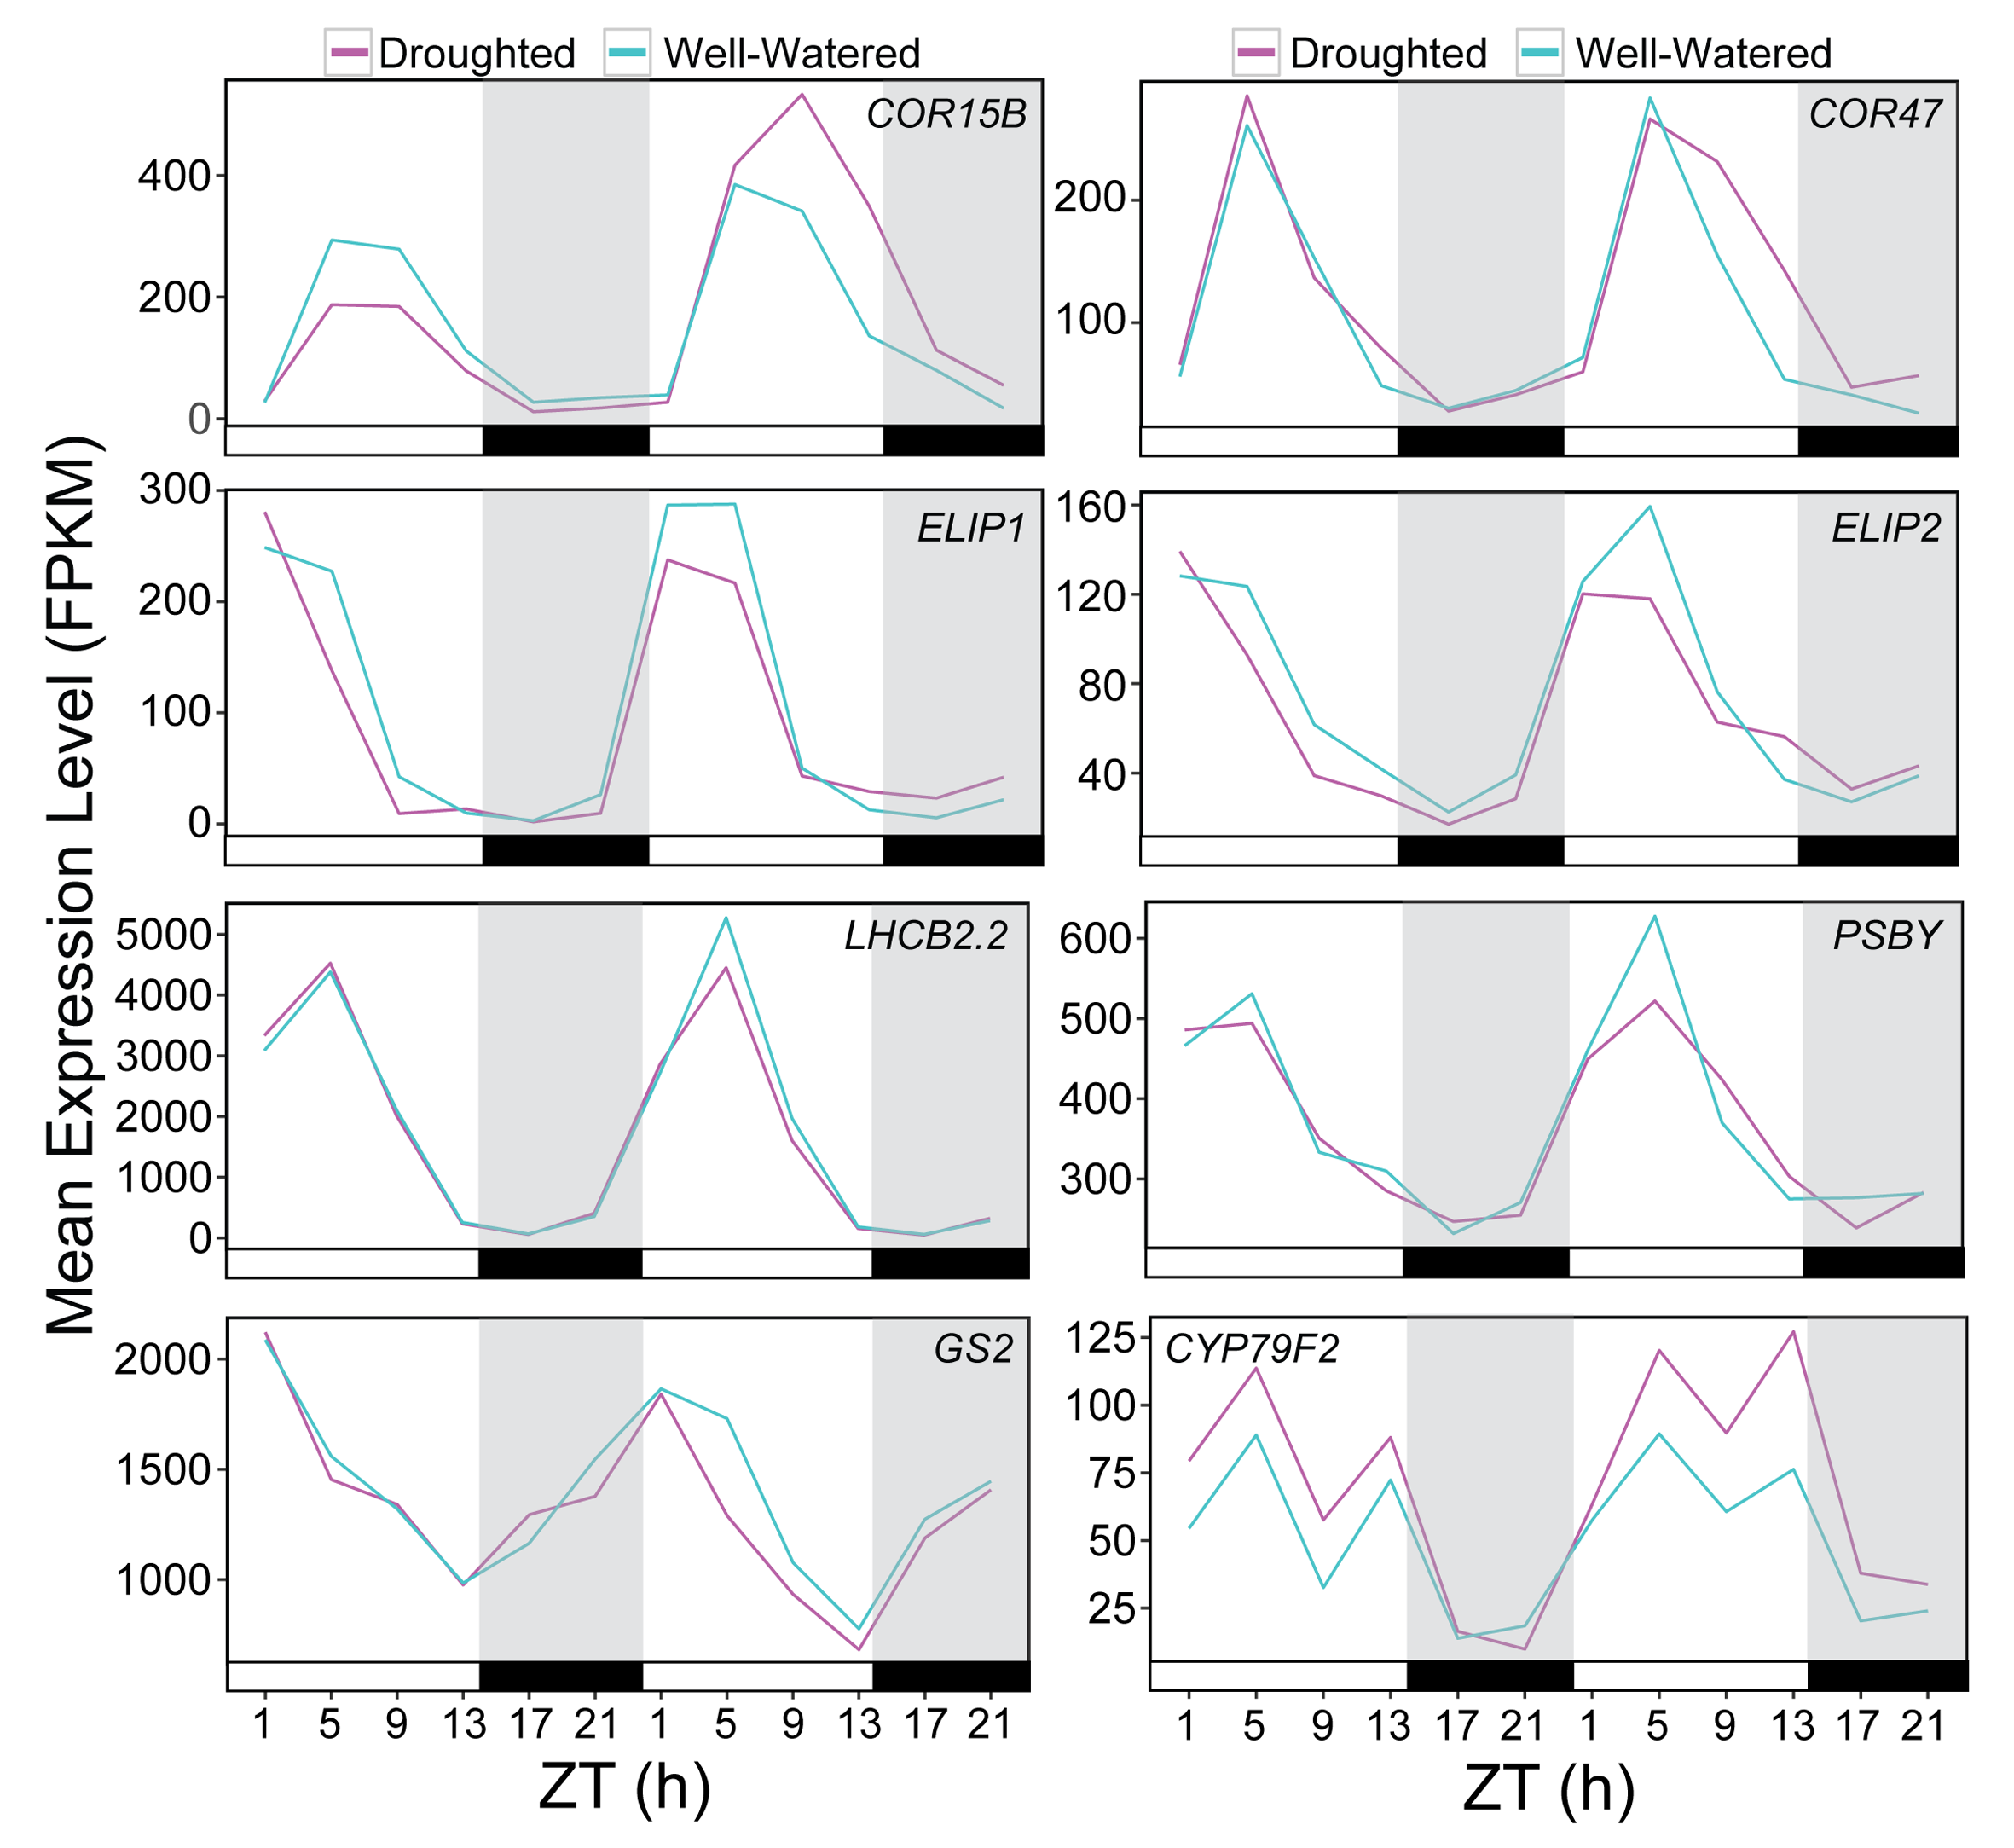

Supplement: supp [file elife-29655-supp-v1.zip › elife_poa_e29655_Figure_10_figure_supplement_2.tif]

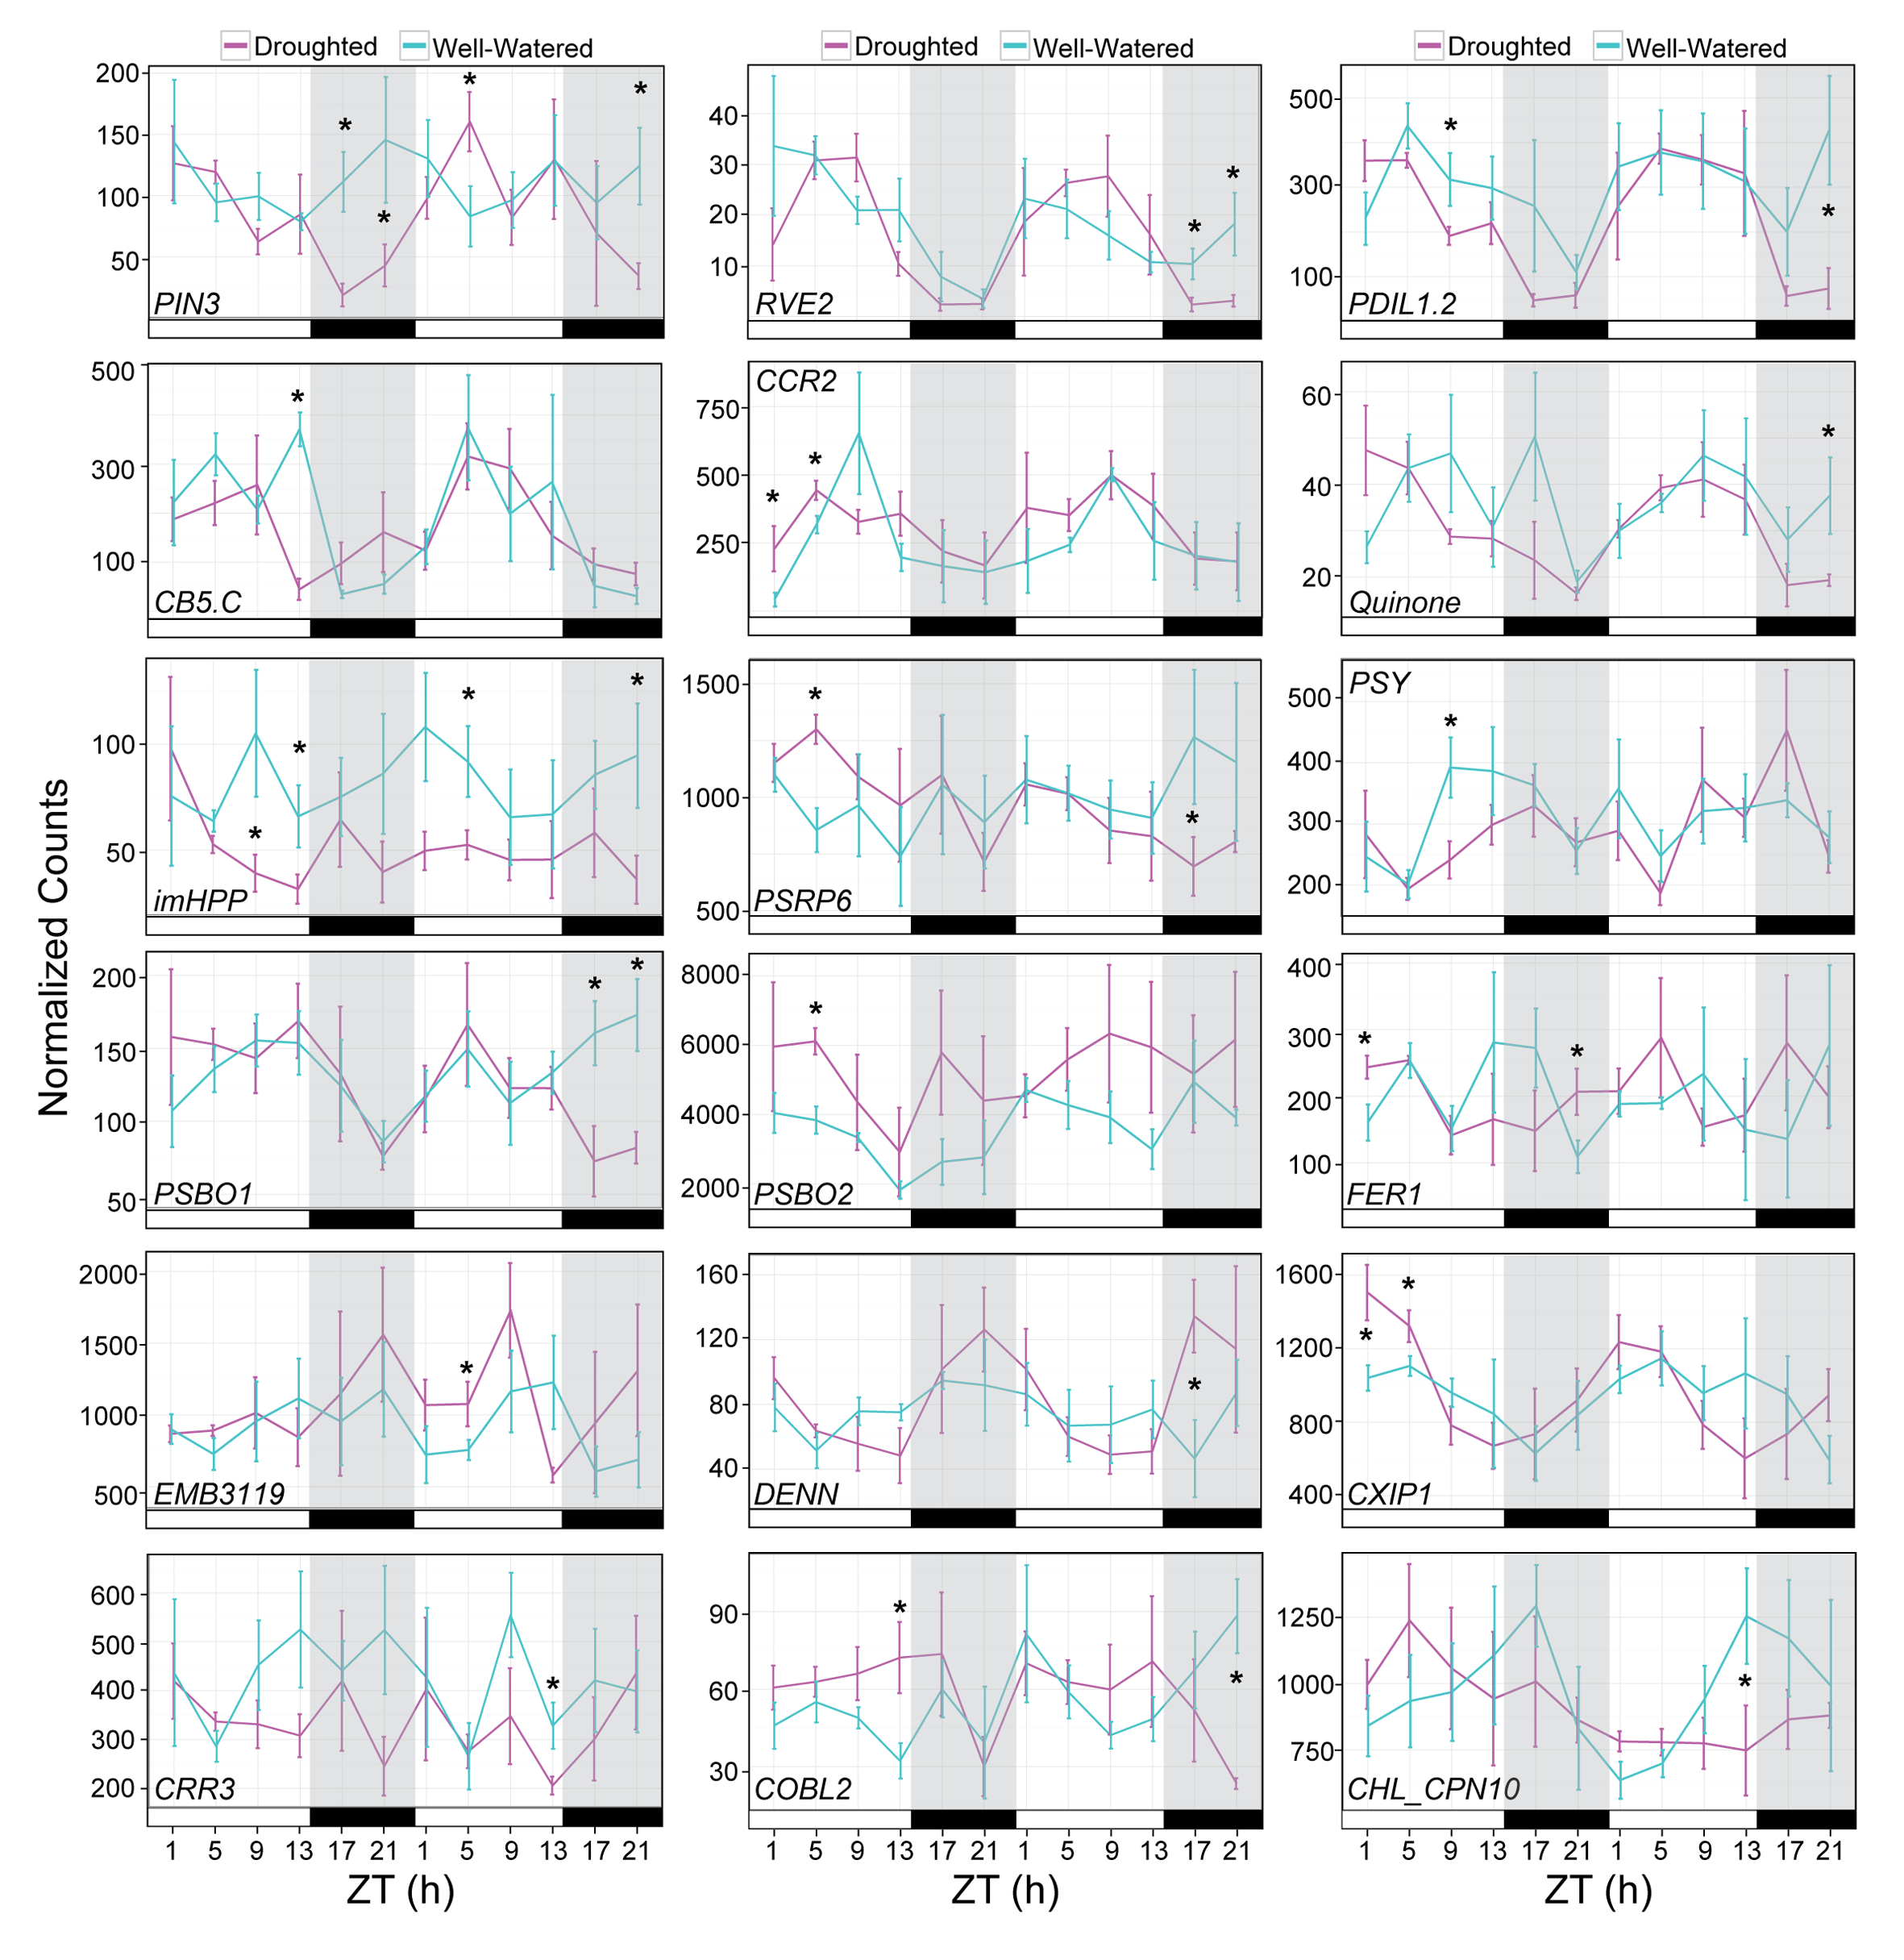

Supplement: supp [file elife-29655-supp-v1.zip › elife_poa_e29655_Figure_10_figure_supplement_1.tif]

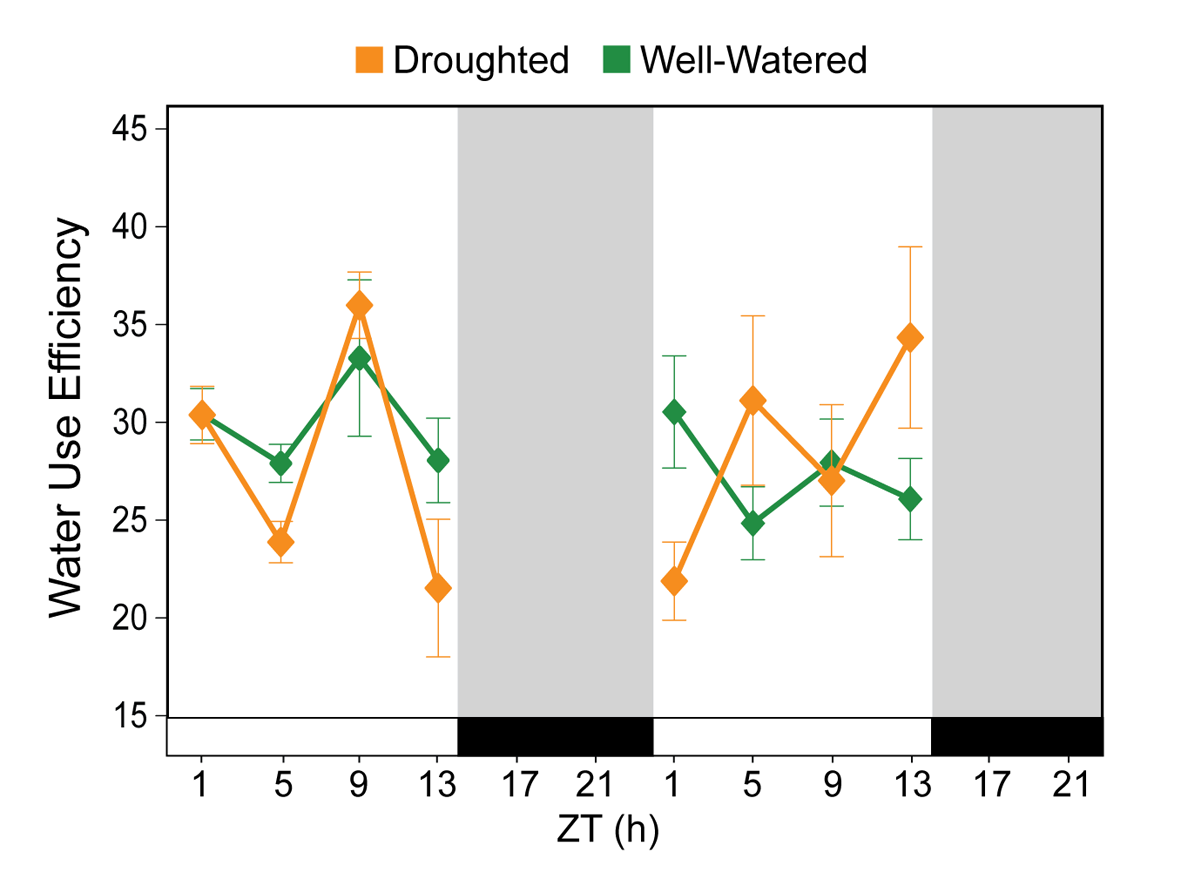

Supplement: supp [file elife-29655-supp-v1.zip › elife_poa_e29655_Figure_3_figure_supplement_1.tif]
